# Supplementary material for: A Polyol-Polyol Super-Carbon-Chain Compound Containing Thirty-Six Carbon Stereocenters from the Dinoflagellate Amphidinium gibbosum: Absolute Configuration and Multi-Segment Modification
Source: PubMed Central journal article supplement (PMC7759953; doi:10.3390/md18120590), 2020-11-26

## Supporting Information-I

### Table of Contents:

|                                                                                                                 |       |
|-----------------------------------------------------------------------------------------------------------------|-------|
| <b>Table S1.</b> $^3J_{\text{H,H}}$ (Hz) of the 1,2,3,4-tetraol moiety in <b>1c</b> (CD <sub>3</sub> OD) .....  | S2    |
| <b>Table S2.</b> $^1\text{H}$ (700 MHz) and $^{13}\text{C}$ (175 MHz) NMR data for the fragment <b>1a</b> ..... | S3    |
| <b>Table S3.</b> $^1\text{H}$ (700 Hz) and $^{13}\text{C}$ (175 Hz) NMR data for the fragment <b>1b</b> .....   | S3-S4 |
| <b>Table S4.</b> $^1\text{H}$ (700 MHz) and $^{13}\text{C}$ (175 MHz) NMR data for the fragment <b>1c</b> ..... | S4-S5 |
| <b>Table S5.</b> $^1\text{H}$ (400 MHz) NMR data for <b>1as/r</b> in CD <sub>3</sub> OD .....                   | S6    |

**Table S1.**  $^3J_{H,H}$  (Hz) of the 1,2,3,4-tetraol moiety in **1c** (CD<sub>3</sub>OD).<sup>1</sup>

|  | <b>1c</b>           | Kishi's universal NMR database |     |     |      |            |            |     |      |      |
|--|---------------------|--------------------------------|-----|-----|------|------------|------------|-----|------|------|
|  |                     | SSS                            | AAA | ASA | SAS  | <b>SAA</b> | AAS        | SSA | ASS  |      |
|  | $^3J_{H-39,H-40}$   | 1.8                            | 4.4 | 5.1 | 8.7  | 1.8        | <b>2.0</b> | 4.4 | 4.7  | 8.1  |
|  | $^3J_{H-40,H-41}$   | 8.1                            | 4.8 | 6.7 | 1.0  | 9.2        | <b>8.5</b> | 8.5 | 2.3  | 2.3  |
|  | $^3J_{H-41,H-42}$   | 4.9                            | 4.0 | 5.8 | 8.9  | 1.4        | <b>4.4</b> | 2.0 | 8.1  | 4.7  |
|  | $\Sigma \Delta Hz $ | N/A                            | 6.8 | 5.6 | 18.0 | 4.6        | <b>1.1</b> | 5.9 | 11.9 | 12.3 |

A: *anti*; S: *syn*

## Reference

[1]. Seike, I. Ghoshi, Y. Kishi, Attempts to assemble a universal NMR database without synthesis of NMR database compounds. *Org. Lett.* **2006**, 8, 3861-3864.

**Table S2.**  $^1\text{H}$  (700 MHz) and  $^{13}\text{C}$  (175 MHz) NMR data for the fragment **1a** in  $\text{CD}_3\text{OD}$  ( $\delta$  in ppm and  $J$  in Hz).

| No. | $\delta_{\text{H}}$ | $\delta_{\text{C}}$ |
|-----|---------------------|---------------------|
| 1a  | 3.41 dd (11.2, 6.3) | 67.4 $\text{CH}_2$  |
| 1b  | 3.46 dd (11.2, 4.2) |                     |
| 2   | 3.54 m              | 73.5 CH             |
| 3a  | 1.39 m              | 31.8 $\text{CH}_2$  |
| 3b  | 1.51 m              |                     |
| 4a  | 1.32 m              | 34.8 $\text{CH}_2$  |
| 4b  | 1.36 m              |                     |
| 5   | 1.69 m              | 30.3 CH             |
| 6a  | 1.17 m              | 46.2 $\text{CH}_2$  |
| 6b  | 1.43 m              |                     |
| 7   | 3.76 m              | 68.1 CH             |
| 8a  | 1.28 m              | 43.2 $\text{CH}_2$  |
| 8b  | 1.48 m              |                     |
| 9   | 1.78 m              | 33.7 CH             |
| 10a | 3.38 dd (10.5, 6.3) | 68.0 $\text{CH}_2$  |
| 10b | 3.44 dd (10.5, 5.6) |                     |
| 71  | 0.91 d (7.0)        | 19.5 $\text{CH}_3$  |
| 72  | 0.94 d (7.0)        | 18.0 $\text{CH}_3$  |

**Table S3.**  $^1\text{H}$  (700 Hz) and  $^{13}\text{C}$  (175 Hz) NMR data for the fragment **1b** in  $\text{CD}_3\text{OD}$  ( $\delta$  in ppm,  $J$  in Hz).

| No.       | $\delta_{\text{H}}$ | $\delta_{\text{C}}$ |
|-----------|---------------------|---------------------|
| 13        | 3.74 m              | 68.6 CH             |
| 13'       | 3.73 m              | 68.9 CH             |
| 14a/14b   | 1.48 m/1.65 m       | 36.5 $\text{CH}_2$  |
| 14a'/14b' |                     | 36.7 $\text{CH}_2$  |
| 15a/15b   | 1.46 m/1.66 m       | 29.9 $\text{CH}_2$  |
| 15a'/15b' | 1.38 m/1.73 m       | 30.2 $\text{CH}_2$  |
| 16        | 3.41 m              | 76.3 CH             |
| 16'       | 3.40 m              | 76.5 CH             |
| 17        | 3.69 m              | 72.8 CH             |
| 18a       | 1.50 m              | 41.3 $\text{CH}_2$  |
| 18b       | 1.67 m              |                     |
| 19        | 4.10 m              | 66.5 CH             |
| 20a       | 1.58 m              | 46.9 $\text{CH}_2$  |
| 20b       | 1.58 m              |                     |
| 21        | 4.11 m              | 66.44 CH            |
| 22a       | 1.58 m              | 46.9 $\text{CH}_2$  |
| 22b       | 1.58 m              |                     |

|     |                          |                       |
|-----|--------------------------|-----------------------|
| 23  | 4.11 m                   | 66.36 CH              |
| 24a | 1.55 m                   | 41.5 CH <sub>2</sub>  |
| 24b | 1.80 m                   |                       |
| 25  | 3.89 ddd (9.8, 6.3, 2.1) | 70.7 CH               |
| 26  | 3.37 t (6.3)             | 78.7 CH               |
| 27  | 3.85 ddd (9.1, 6.3, 2.8) | 73.3 CH               |
| 28a | 1.58 m                   | 40.4 CH <sub>2</sub>  |
| 28b | 1.86 m                   |                       |
| 29  | 3.97 m                   | 69.9 CH               |
| 30a | 1.32 m                   | 42.6 CH <sub>2</sub>  |
| 30b | 1.56 m                   |                       |
| 31  | 1.81 m                   | 33.4 CH               |
| 32a | 3.39 dd (10.5, 6.3)      | 68.0 CH <sub>2</sub>  |
| 32b | 3.47 dd (10.5, 5.6)      |                       |
| 74  |                          | 23.58 CH <sub>3</sub> |
| 74' | 1.16 d (6.3)             | 23.63 CH <sub>3</sub> |
| 75  | 0.96 d (6.3)             | 18.2 CH <sub>3</sub>  |

**Table S4.** <sup>1</sup>H (700 MHz) and <sup>13</sup>C (175 MHz) NMR data for the fragment **1c** in CD<sub>3</sub>OD ( $\delta$  in ppm,  $J$  in Hz).

| No.       | $\delta_{\text{H}}$       | $\delta_{\text{C}}$  |
|-----------|---------------------------|----------------------|
| 33        |                           | 68.49 CH             |
| 33'       | 3.75 m                    | 68.54 CH             |
| 34a/34b   | 1.50 m/1.61 m             | 36.5 CH <sub>2</sub> |
| 34a'/34b' | 1.49 m/1.63 m             | 36.7 CH <sub>2</sub> |
| 35a/35b   | 1.58 m/1.60 m             | 30.2 CH <sub>2</sub> |
| 35a'/35b' | 1.47 m/1.68 m             | 30.4 CH <sub>2</sub> |
| 36        | 3.44 m                    | 75.4 CH              |
| 37        | 3.68 m                    | 73.6 CH              |
| 38a       | 1.78 m                    |                      |
| 38b       | 1.82 m                    | 37.3 CH <sub>2</sub> |
| 39        | 4.13 ddd (9.2, 5.3, 1.8)  | 70.3 CH              |
| 40        | 3.45 dd (8.1, 1.8)        | 74.6 CH              |
| 41        | 3.69 dd (8.1, 4.9)        | 75.6 CH              |
| 42        | 4.04 ddd (10.5, 4.9, 2.1) | 70.0 CH              |
| 43a       | 1.77 m                    |                      |
| 43b       | 1.98 m                    | 34.8 CH <sub>2</sub> |
| 44        | 3.67 m                    | 70.9 CH              |
| 45        | 3.03 t (8.4)              | 77.6 CH              |
| 46        | 3.74 m                    | 70.3 CH              |
| 47a       | 1.70 m                    |                      |
| 47b       | 1.88 m                    | 37.6 CH <sub>2</sub> |
| 48        | 3.93 m                    | 73.1 CH              |

---

|     |                          |                      |
|-----|--------------------------|----------------------|
| 49a | 1.38 m                   | 32.4 CH <sub>2</sub> |
| 49b | 1.92 m                   |                      |
| 50a | 1.52 m                   | 23.3 CH <sub>2</sub> |
| 50b |                          |                      |
| 51a | 1.52 m                   | 32.7 CH <sub>2</sub> |
| 51b | 1.75 m                   |                      |
| 52  | 3.41 m                   | 76.4 CH              |
| 53  | 3.14 t (7.7)             | 75.2 CH              |
| 54  | 3.72 t (7.7)             | 75.1 CH              |
| 55  | 3.78 dd (7.7, 4.9)       | 73.8 CH              |
| 56  | 3.60 dd (9.1, 4.9)       | 75.7 CH              |
| 57  | 4.40 m                   | 67.7 CH              |
| 58a | 1.52 m                   | 42.0 CH <sub>2</sub> |
| 58b | 1.86 m                   |                      |
| 59  | 4.10 m                   | 67.1 CH              |
| 60a | 1.67 m                   | 42.6 CH <sub>2</sub> |
| 60b | 1.84 m                   |                      |
| 61  | 4.09 m                   | 69.7 CH              |
| 62  | 3.25 dd (7.7, 1.4)       | 77.1 CH              |
| 63  | 3.83 ddd (9.8, 7.7, 2.8) | 71.8 CH              |
| 64a | 1.63 m                   | 42.5 CH <sub>2</sub> |
| 64b | 1.94 m                   |                      |
| 65  | 4.11 m                   | 68.8 CH              |
| 66a | 1.55 m                   | 41.7 CH <sub>2</sub> |
| 66b | 1.59 m                   |                      |
| 67  | 3.87 m                   | 70.1 CH              |
| 68a | 3.46 dd (11.2, 6.3)      | 67.9 CH <sub>2</sub> |
| 68b | 3.49 dd (11.2, 4.2)      |                      |
| 76  |                          | 23.6 CH <sub>3</sub> |
| 76' | 1.17 d (6.3)             | 23.5 CH <sub>3</sub> |

---

**Table S5.** <sup>1</sup>H (400 MHz) NMR data for **1as** and **1ar** in CD<sub>3</sub>OD ( $\delta$  in ppm, *J* in Hz).

| No. | <b>1as</b>          | <b>1ar</b>          |
|-----|---------------------|---------------------|
| 1a  | 4.34 dd (12.8, 6.0) | 4.22 dd (12.4, 4.4) |
| 1b  | 4.71 dd (12.8, 2.4) | 4.55 dd (12.4, 2.4) |
| 2   | 5.26 m              | 5.19 m              |
| 3a  | 1.49 m              | 1.50 m              |
| 3b  | 1.49 m              | 1.50 m              |
| 4a  | 0.95 m              | 1.05 m              |
| 4b  | 1.09 m              | 1.10 m              |
| 5   | 1.24 m              | 1.06 m              |
| 6a  | 1.11 m              | 1.10 m              |
| 6b  | 1.46 m              | 1.43 m              |
| 7   | 5.16 m              | 5.19 m              |
| 8a  | 1.48 m              | 1.56 m              |
| 8b  | 1.48 m              | 1.56 m              |
| 9   | 1.69 m              | 1.84 m              |
| 10a | 4.13 dd (10.8, 4.8) | 4.18 dd (10.8, 6.0) |
| 10b | 4.18 dd (10.8, 5.6) | 4.29 dd (10.8, 5.2) |
| 71  | 0.74 d (6.4)        | 0.73 d (5.2)        |
| 72  | 0.86 d (6.4)        | 0.96 d (6.8)        |

# Supporting Information-II

Copies of High Performance Liquid Chromatogram, the UV spectrum, HR-ESI-MS for **1**; LR-ESI-MS for **1a–1c**, **1as**, and **1ar**; and 1D and 2D NMR spectra for **1**, **1a–1c**, **1as**, and **1ar**.

## Table of Contents:

|                                                                                                                                          |         |
|------------------------------------------------------------------------------------------------------------------------------------------|---------|
| 1. High Performance Liquid Chromatogram and the UV spectrum for compound <b>1</b> .....                                                  | S5      |
| 2. HR-ESI-MS for compound <b>1</b> .....                                                                                                 | S6-S7   |
| 3. <sup>1</sup> H (700 MHz) NMR spectrum of compound <b>1</b> in CD <sub>3</sub> OD.....                                                 | S8-S14  |
| 4. <sup>13</sup> C (175 MHz) NMR spectrum of compound <b>1</b> in CD <sub>3</sub> OD.....                                                | S15-S21 |
| 5. DEPT135 (175 MHz) spectrum of compound <b>1</b> in CD <sub>3</sub> OD .....                                                           | S22-S26 |
| 6. <sup>1</sup> H- <sup>1</sup> H COSY (700 MHz) spectrum of compound <b>1</b> in CD <sub>3</sub> OD .....                               | S27-S30 |
| 7. HSQC (700 MHz) spectrum of compound <b>1</b> in CD <sub>3</sub> OD .....                                                              | S31-S34 |
| 8. Selective-HSQC (700 MHz) spectrum of compound <b>1</b> in CD <sub>3</sub> OD.....                                                     | S35-S41 |
| 9. HMBC (700 MHz) spectrum of compound <b>1</b> in CD <sub>3</sub> OD .....                                                              | S42-S47 |
| 10. H2BC (700 MHz) spectrum of compound <b>1</b> in CD <sub>3</sub> OD .....                                                             | S48-S53 |
| 11. NOESY (700 MHz) spectrum of compound <b>1</b> in CD <sub>3</sub> OD .....                                                            | S54-S56 |
| 12. <sup>13</sup> C (175 MHz) NMR spectrum of compound <b>1</b> in CD <sub>3</sub> OH.....                                               | S57     |
| 13. Comparison of <sup>13</sup> C (175 MHz) NMR spectrum of compound <b>1</b> in CD <sub>3</sub> OH with that in CD <sub>3</sub> OD..... | S58-S60 |
| 14. LR-ESI-MS for the fragment <b>1a</b> .....                                                                                           | S61     |
| 15. <sup>1</sup> H (700 MHz) NMR spectrum of the fragment <b>1a</b> in CD <sub>3</sub> OD.....                                           | S62-S64 |
| 16. <sup>13</sup> C (175 MHz) NMR spectrum of the fragment <b>1a</b> in CD <sub>3</sub> OD.....                                          | S65-S66 |
| 17. DEPT135 (175 MHz) spectrum of the fragment <b>1a</b> in CD <sub>3</sub> OD .....                                                     | S67-S68 |
| 18. <sup>1</sup> H- <sup>1</sup> H COSY (700 MHz) spectrum of the fragment <b>1a</b> in CD <sub>3</sub> OD .....                         | S69-S72 |
| 19. HSQC (700 MHz) spectrum of the fragment <b>1a</b> in CD <sub>3</sub> OD .....                                                        | S73-S75 |
| 20. HMBC (700 MHz) spectrum of the fragment <b>1a</b> in CD <sub>3</sub> OD .....                                                        | S76-S77 |
| 21. 2D JRES (700 MHz) spectrum of the fragment <b>1a</b> in CD <sub>3</sub> OD .....                                                     | S78-S81 |



|                                                                                                                  |           |
|------------------------------------------------------------------------------------------------------------------|-----------|
| 21. HECADE (700 MHz) spectrum of the fragment <b>1a</b> in CD <sub>3</sub> OD .....                              | S82-S86   |
| 22. LR-ESI-MS for the fragment <b>1b</b> .....                                                                   | S87       |
| 23. <sup>1</sup> H (700 MHz) NMR spectrum of the fragment <b>1b</b> in CD <sub>3</sub> OD .....                  | S88-S90   |
| 24. <sup>13</sup> C (175 MHz) NMR spectrum of the fragment <b>1b</b> in CD <sub>3</sub> OD .....                 | S91-S93   |
| 25. DEPT135 (175 MHz) spectrum of the fragment <b>1b</b> in CD <sub>3</sub> OD .....                             | S94-S96   |
| 26. <sup>1</sup> H- <sup>1</sup> H COSY (700 MHz) spectrum of the fragment <b>1b</b> in CD <sub>3</sub> OD ..... | S97-S100  |
| 27. HSQC (700 MHz) spectrum of the fragment <b>1b</b> in CD <sub>3</sub> OD .....                                | S101-S103 |
| 28. HMBC (700 MHz) spectrum of the fragment <b>1b</b> in CD <sub>3</sub> OD .....                                | S104-S107 |
| 29. 2D JRES (700 MHz) spectrum of the fragment <b>1b</b> in CD <sub>3</sub> OD .....                             | S108-S113 |
| 30. HETLOC (700 MHz) spectrum of the fragment <b>1b</b> in CD <sub>3</sub> OD .....                              | S114-S122 |
| 31. HECADE (700 MHz) spectrum of the fragment <b>1b</b> in CD <sub>3</sub> OD .....                              | S123-S130 |
| 32. LR-ESI-MS for the fragment <b>1c</b> .....                                                                   | S131      |
| 33. <sup>1</sup> H (700 MHz) NMR spectrum of the fragment <b>1c</b> in CD <sub>3</sub> OD .....                  | S132-S134 |
| 34. <sup>13</sup> C (175 MHz) NMR spectrum of the fragment <b>1c</b> in CD <sub>3</sub> OD .....                 | S135-S137 |
| 35. DEPT135 (175 MHz) spectrum of the fragment <b>1c</b> in CD <sub>3</sub> OD .....                             | S138-S140 |
| 36. <sup>1</sup> H- <sup>1</sup> H COSY (700 MHz) spectrum of the fragment <b>1c</b> in CD <sub>3</sub> OD ..... | S141-S144 |
| 37. HSQC (700 MHz) spectrum of the fragment <b>1c</b> in CD <sub>3</sub> OD .....                                | S145-S147 |
| 38. HMBC (700 MHz) spectrum of the fragment <b>1c</b> in CD <sub>3</sub> OD .....                                | S148-S151 |
| 39. NOESY (700 MHz) spectrum of the fragment <b>1c</b> in CD <sub>3</sub> OD .....                               | S152-S155 |
| 40. 2D JRES (700 MHz) spectrum of the fragment <b>1c</b> in CD <sub>3</sub> OD .....                             | S156-S158 |

41. HECADE (700 MHz) spectrum of the fragment **1c** in CD<sub>3</sub>OD ..... S159-S163  
42. LR-ESI-MS for the fragment **1as**.....S164  
43. <sup>1</sup>H (400 MHz) NMR spectrum of the fragment **1as** in CD<sub>3</sub>OD.....S165-S167  
44. <sup>1</sup>H-<sup>1</sup>H COSY (400 MHz) spectrum of the fragment **1as** in CD<sub>3</sub>OD .....S168-S171  
45. LR-ESI-MS for the fragment **1ar**.....S172  
46. <sup>1</sup>H (400 MHz) NMR spectrum of the fragment **1ar** in CD<sub>3</sub>OD.....S173-S175  
47. <sup>1</sup>H-<sup>1</sup>H COSY (400 MHz) spectrum of the fragment **1ar** in CD<sub>3</sub>OD .....S176-S179

# High Performance Liquid Chromatogram and the UV spectrum for compound 1

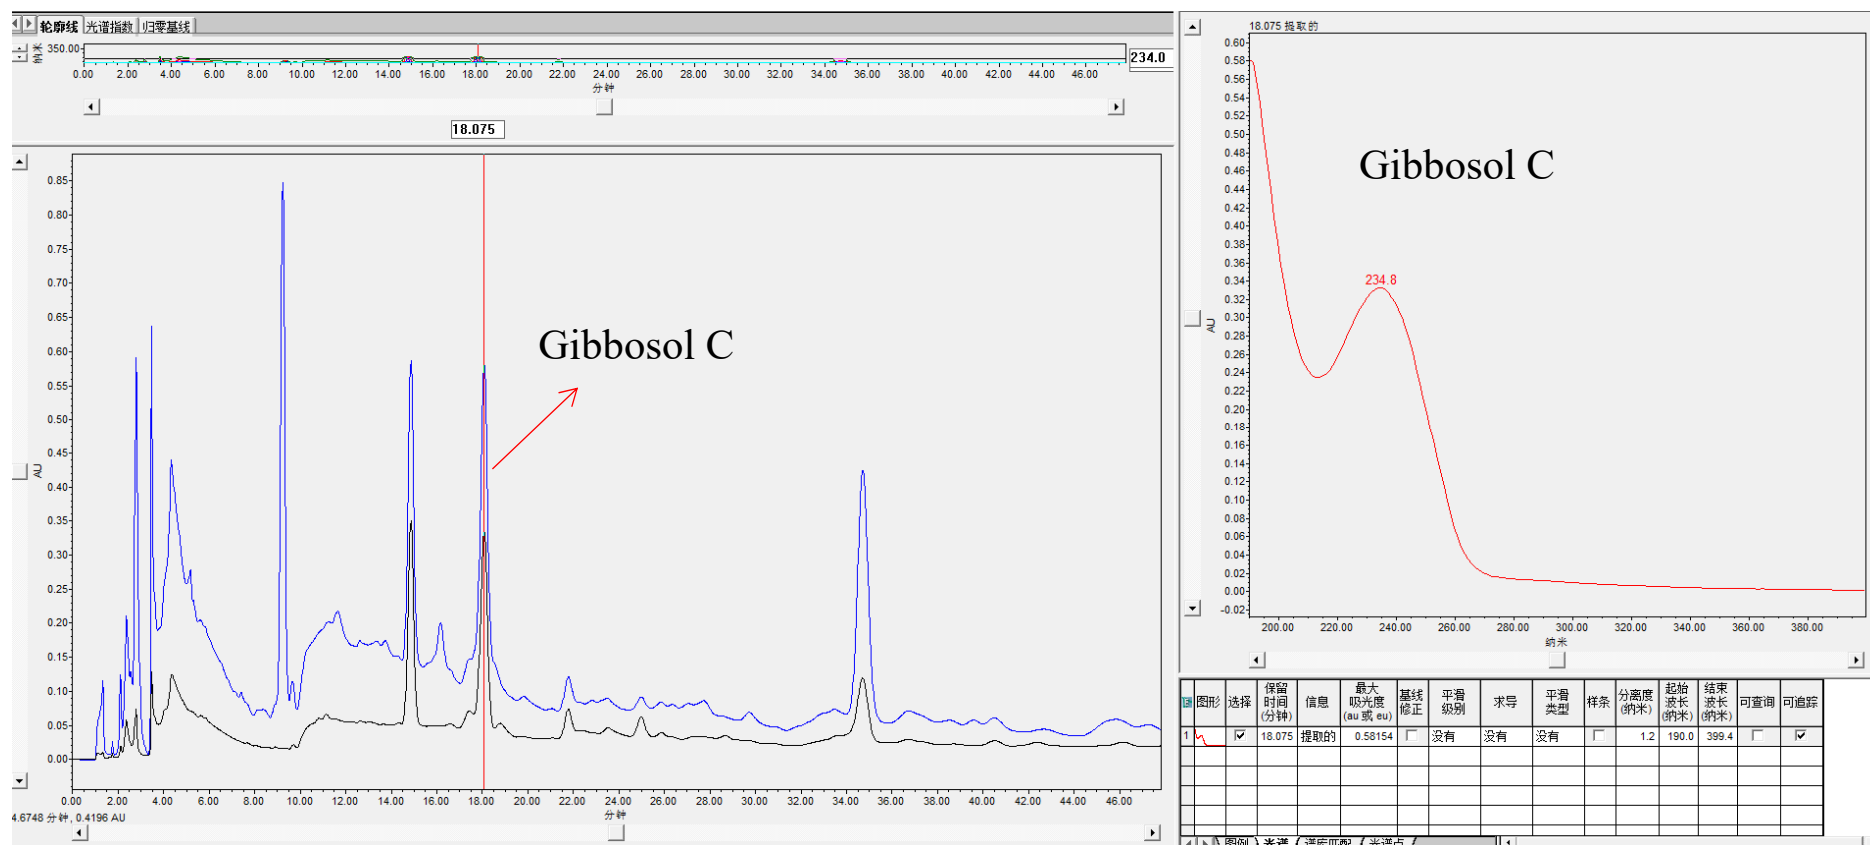

Mobile Phase: MeCN/H<sub>2</sub>O, 21:79; Flow Rate: 1.0 mL/min

# HR-ESI-MS for compound 1

## Mass Spectrum SmartFormula Report

### Analysis Info

Analysis Name D:\Data\MS\data\201905\liwanshan\_40-2-2\_pos\_37\_01\_6600.d  
 Method LC\_Direct Infusion\_pos\_100-3000mz.m  
 Sample Name liwanshan\_40-2-2\_pos  
 Comment

Acquisition Date 5/6/2019 5:10:36 PM  
 Operator SCSIO  
 Instrument maXis 255552.00029

### Acquisition Parameter

|             |          |                      |          |                  |           |
|-------------|----------|----------------------|----------|------------------|-----------|
| Source Type | ESI      | Ion Polarity         | Positive | Set Nebulizer    | 0.4 Bar   |
| Focus       | Active   | Set Capillary        | 4500 V   | Set Dry Heater   | 180 °C    |
| Scan Begin  | 100 m/z  | Set End Plate Offset | 0 V      | Set Dry Gas      | 4.0 l/min |
| Scan End    | 3500 m/z | Set Charging Voltage | 0 V      | Set Divert Valve | Waste     |
|             |          | Set Corona           | 0 nA     | Set APCI Heater  | 0 °C      |

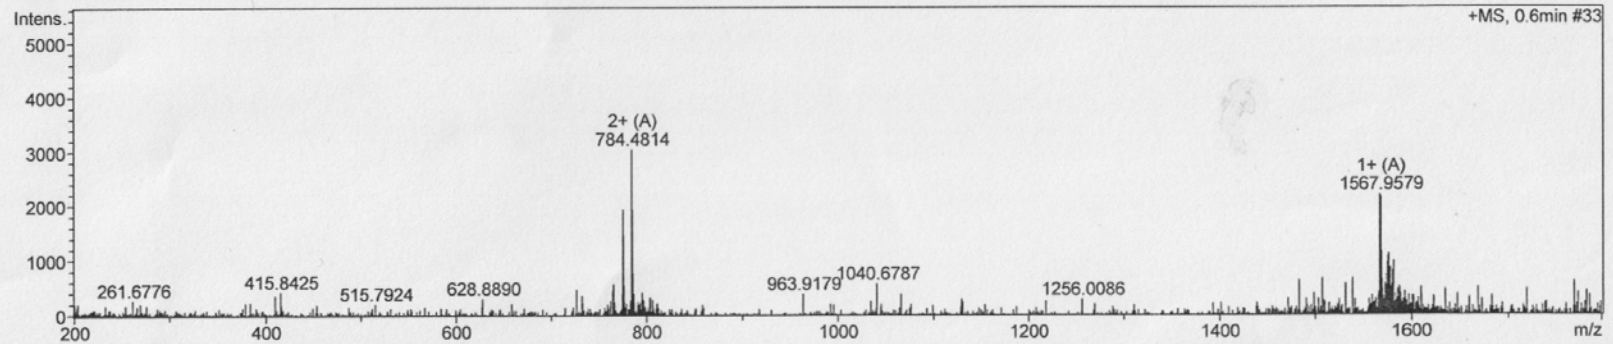

| Meas. m/z | # | Ion Formula | Score  | m/z       | err [ppm] | err [mDa] | mSigma | rdb | e <sup>-</sup> Conf | N-Rule |
|-----------|---|-------------|--------|-----------|-----------|-----------|--------|-----|---------------------|--------|
| 784.4814  | 1 | C76H144O32  | 100.00 | 784.4815  | 0.1       | 0.1       | 118.4  | 5.0 | even                | ok     |
| 1567.9579 | 1 | C76H143O32  | 100.00 | 1567.9557 | 1.4       | 2.2       | 79.1   | 5.5 | even                | ok     |

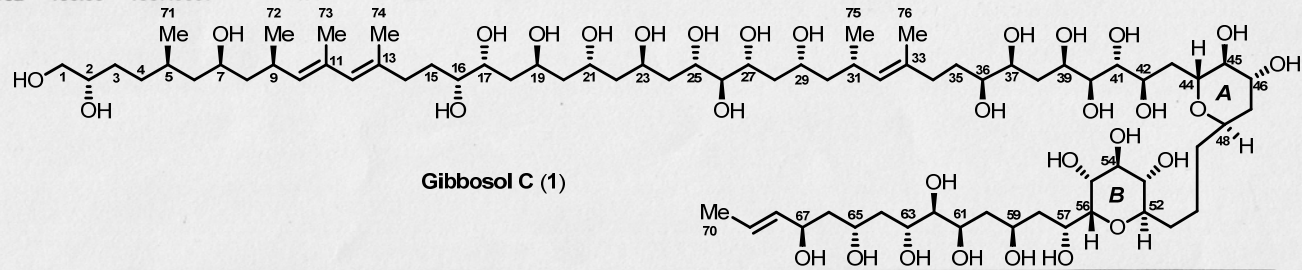

# HR-ESI-MS for compound 1

## Generic Display Report

### Analysis Info

Analysis Name D:\Data\MS\data\201905\liwanshan\_40-2-2\_pos\_37\_01\_6600.d  
Method LC\_Direct Infusion\_pos\_100-3000mz.m  
Sample Name liwanshan\_40-2-2\_pos  
Comment

Acquisition Date 5/6/2019 5:10:36 PM

Operator SCSIO  
Instrument maXis

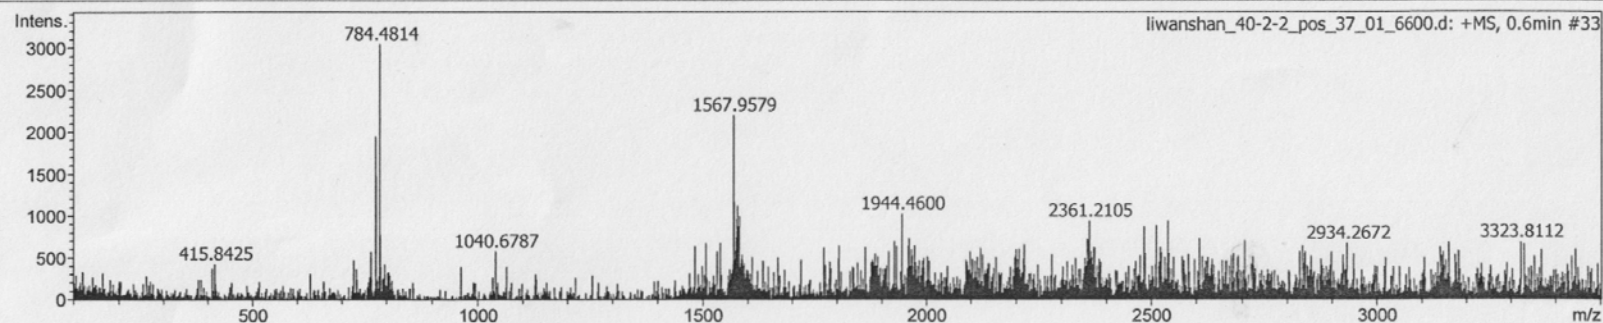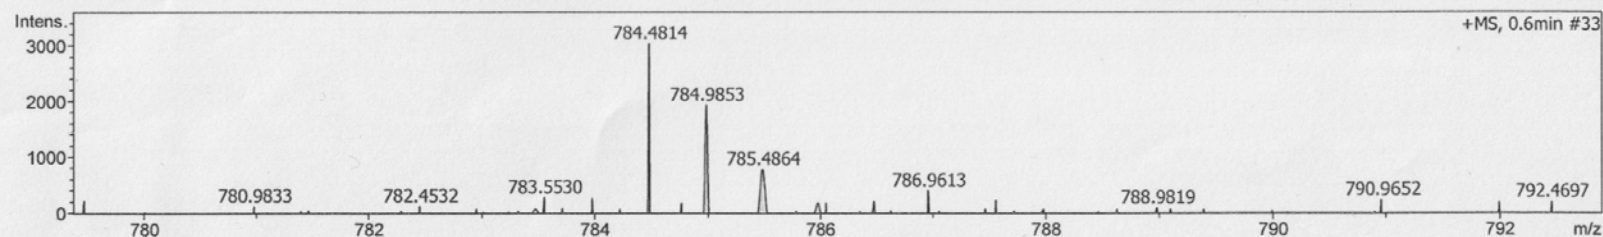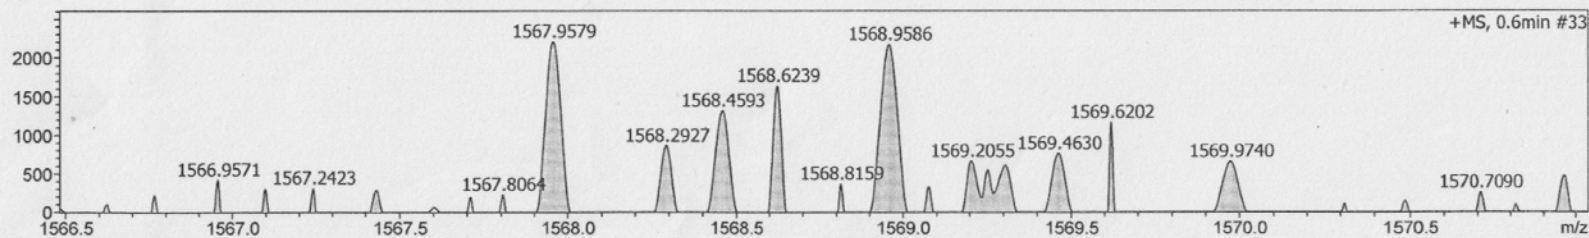

# $^1\text{H}$ (700 MHz) NMR spectrum of compound **1** in $\text{CD}_3\text{OD}$

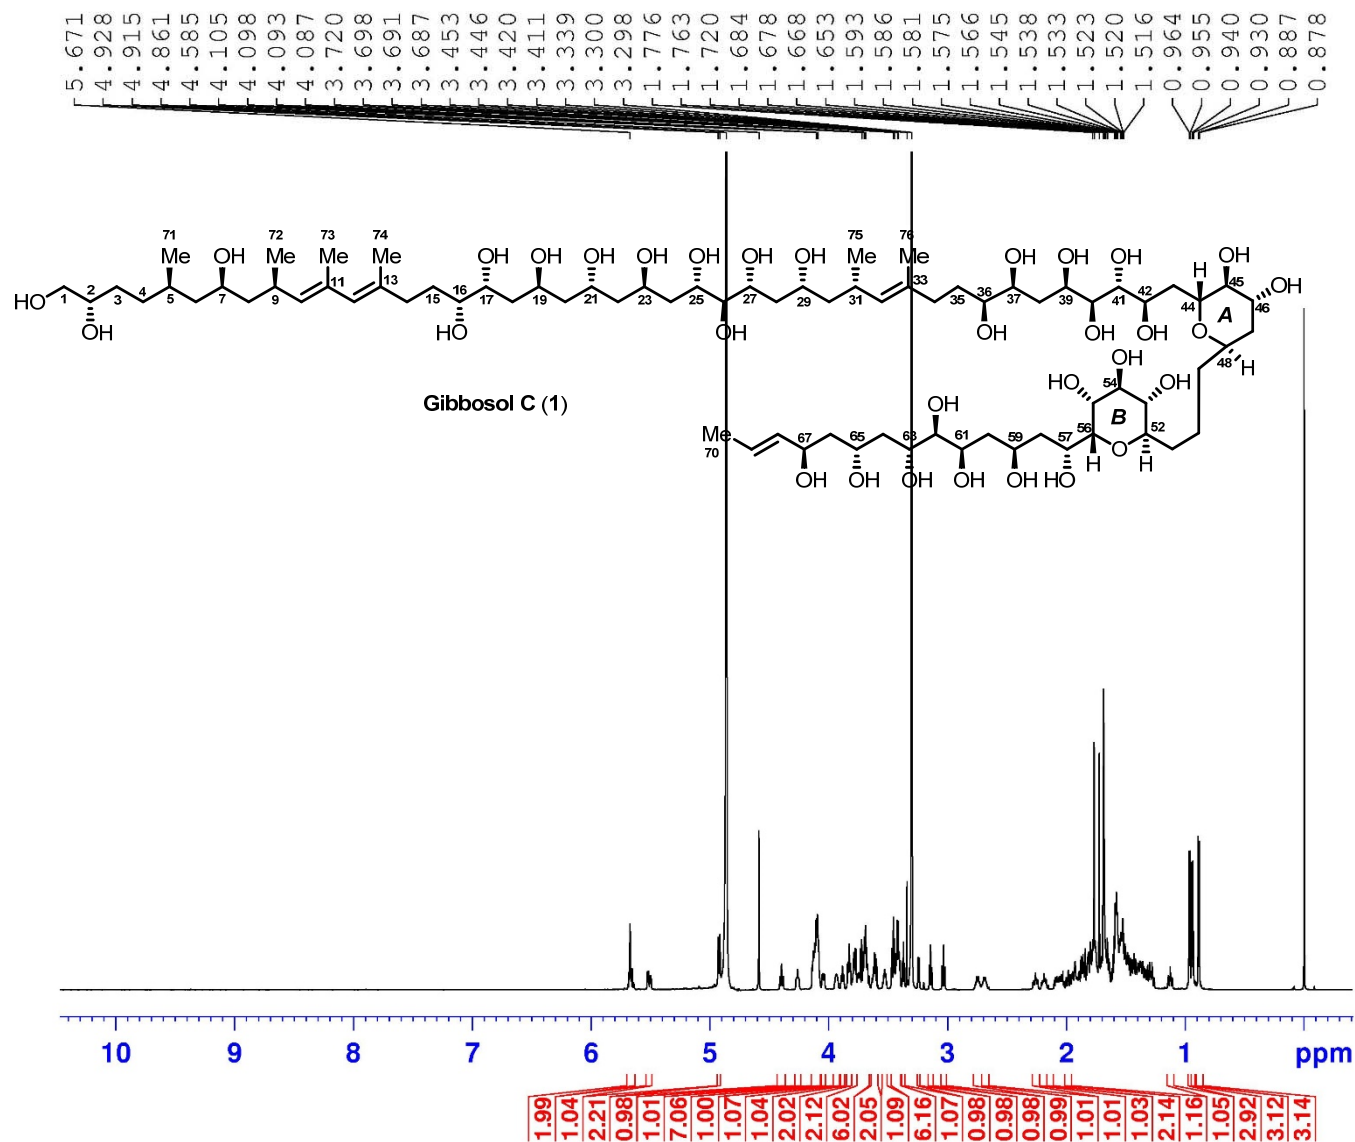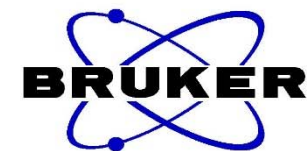

```

NAME      liwanshan-40-2-2
EXPNO     10
PROCNO    1
Date_     20190507
Time      17.44 h
INSTRUM   spect
PROBHD    Z120187_0028 (
PULPROG   zg30
TD         65536
SOLVENT   MeOD
NS         32
DS         2
SWH       14097.744 Hz
FIDRES    0.430229 Hz
AQ        2.3243935 sec
RG         4.87
DW        35.467 usec
DE        10.00 usec
TE        298.0 K
D1        1.50000000 sec
TD0       1
SF01      700.1843236 MHz
NUC1      1H
P1        8.10 usec
SI        65536
SF        700.1800207 MHz
WDW       EM
SSB       0
LB        0.30 Hz
GB        0
PC        1.00
    
```

$^1\text{H}$  (700 MHz) NMR spectrum of compound **1** in  $\text{CD}_3\text{OD}$

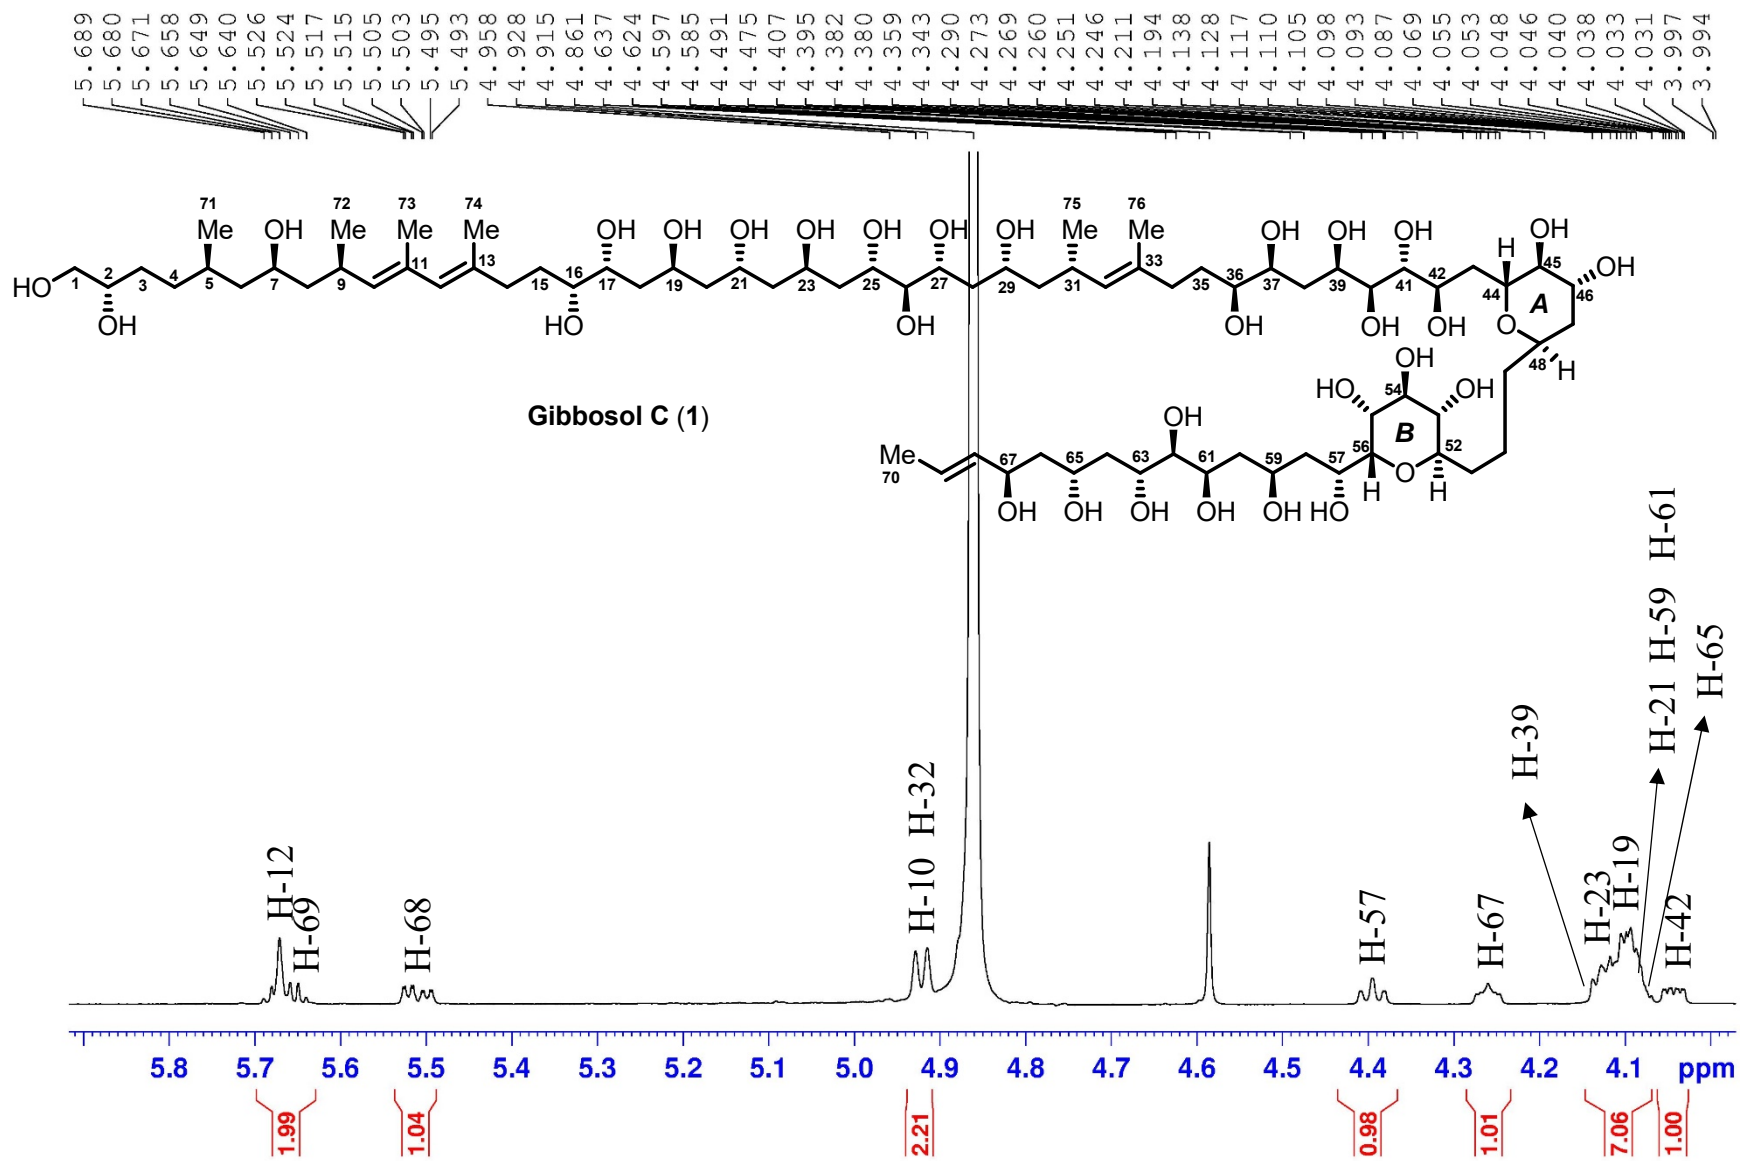

# $^1\text{H}$ (700 MHz) NMR spectrum of compound **1** in $\text{CD}_3\text{OD}$

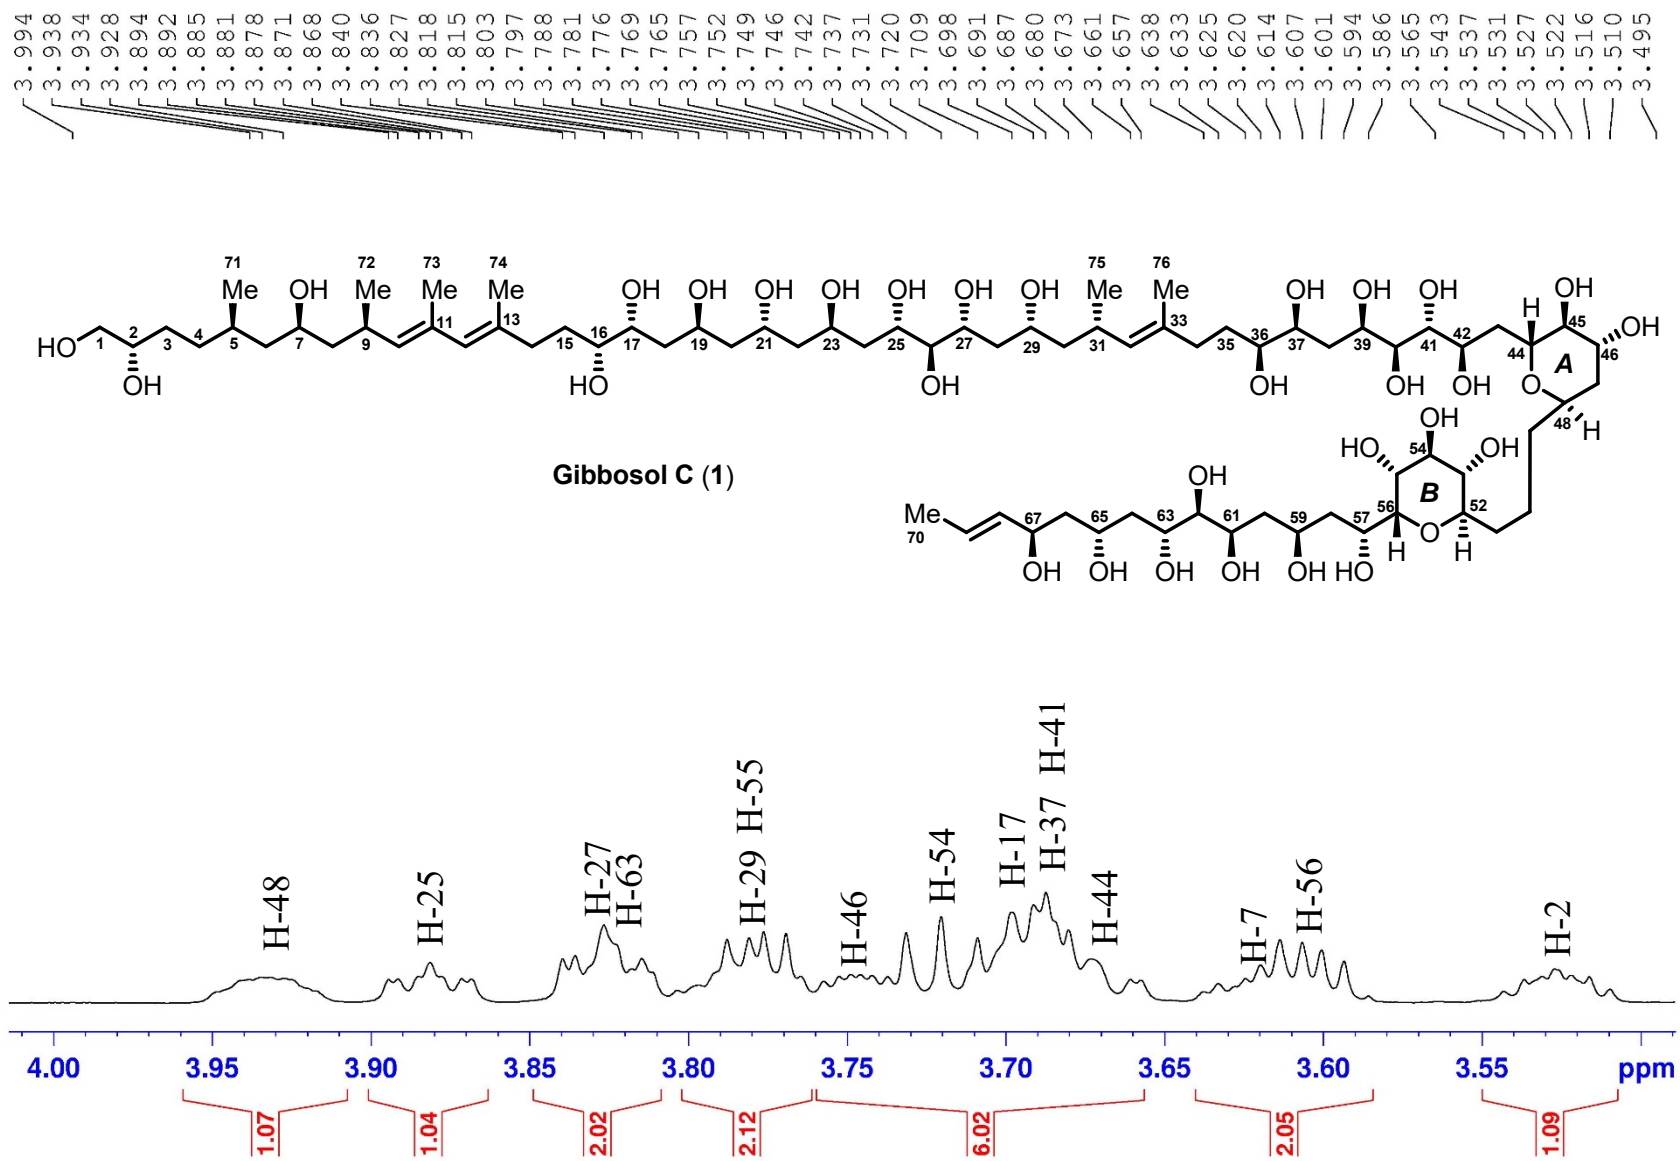



$^1\text{H}$  (700 MHz) NMR spectrum of compound **1** in  $\text{CD}_3\text{OD}$

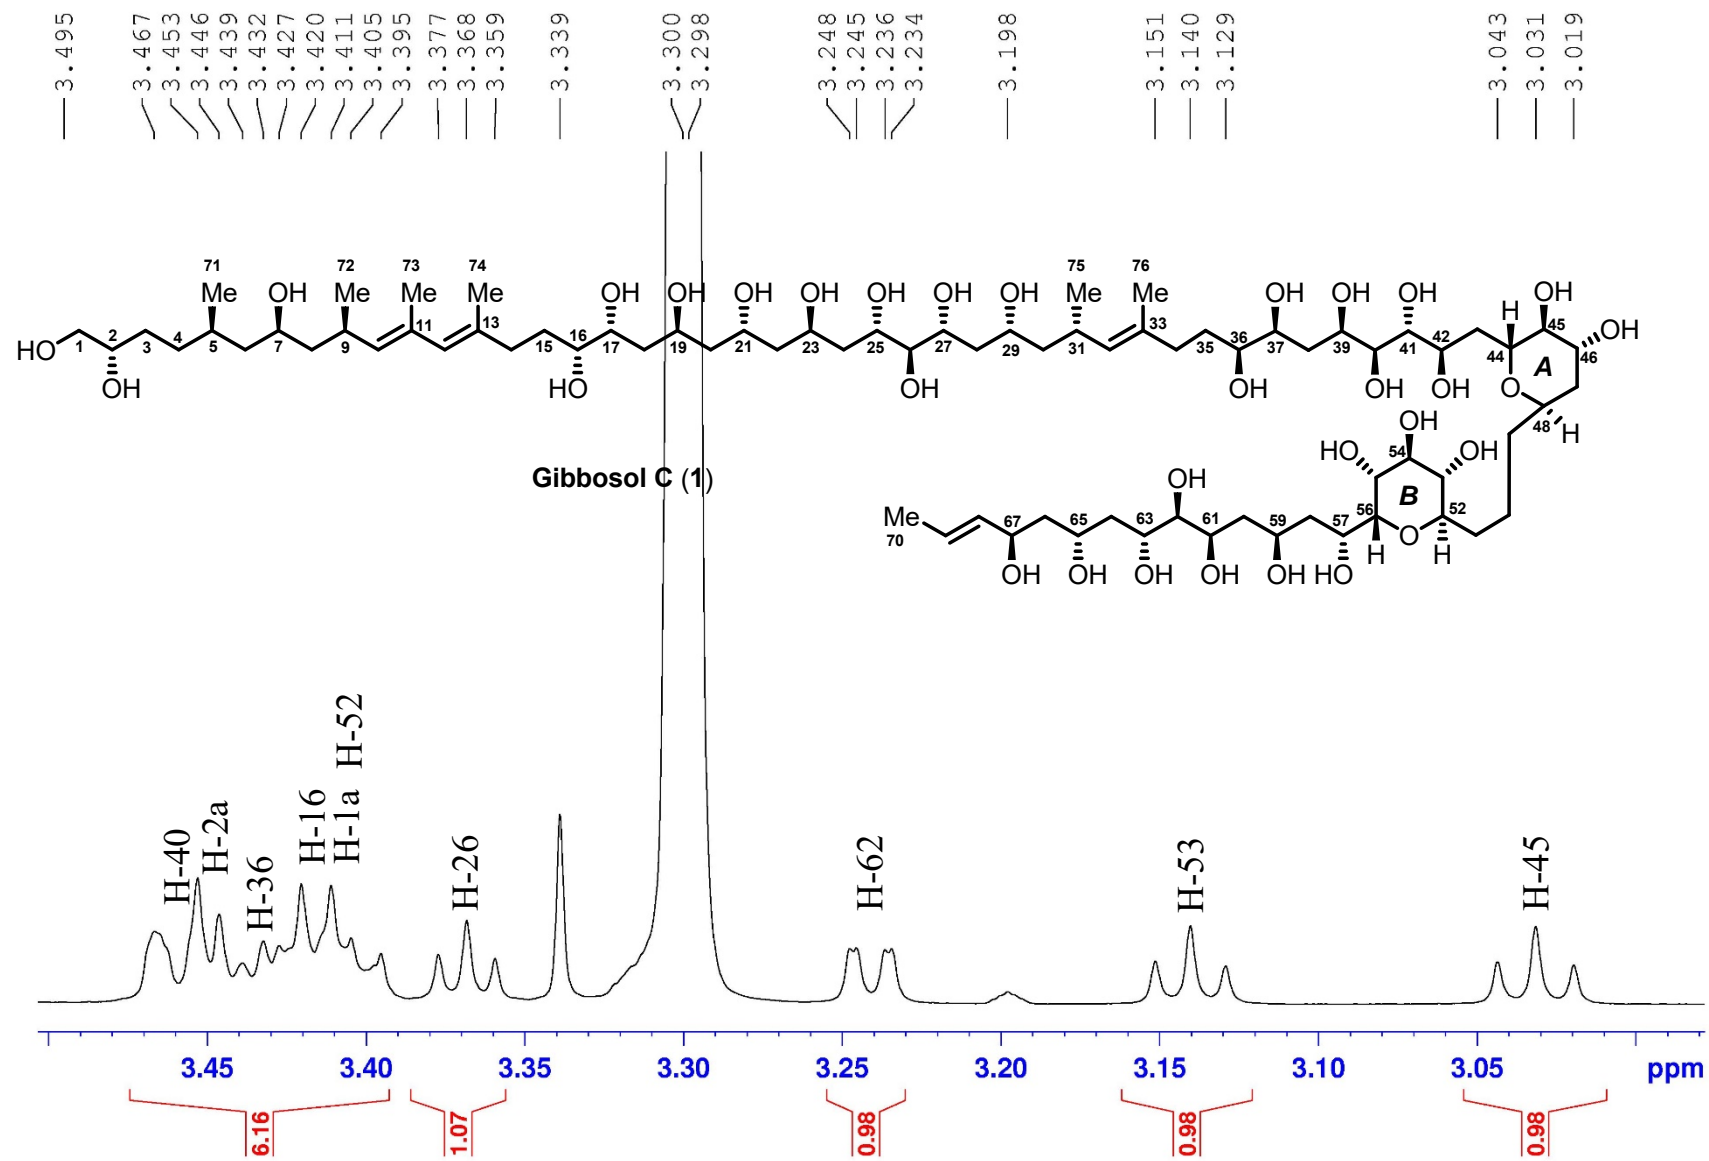

$^1\text{H}$  (700 MHz) NMR spectrum of compound **1** in  $\text{CD}_3\text{OD}$

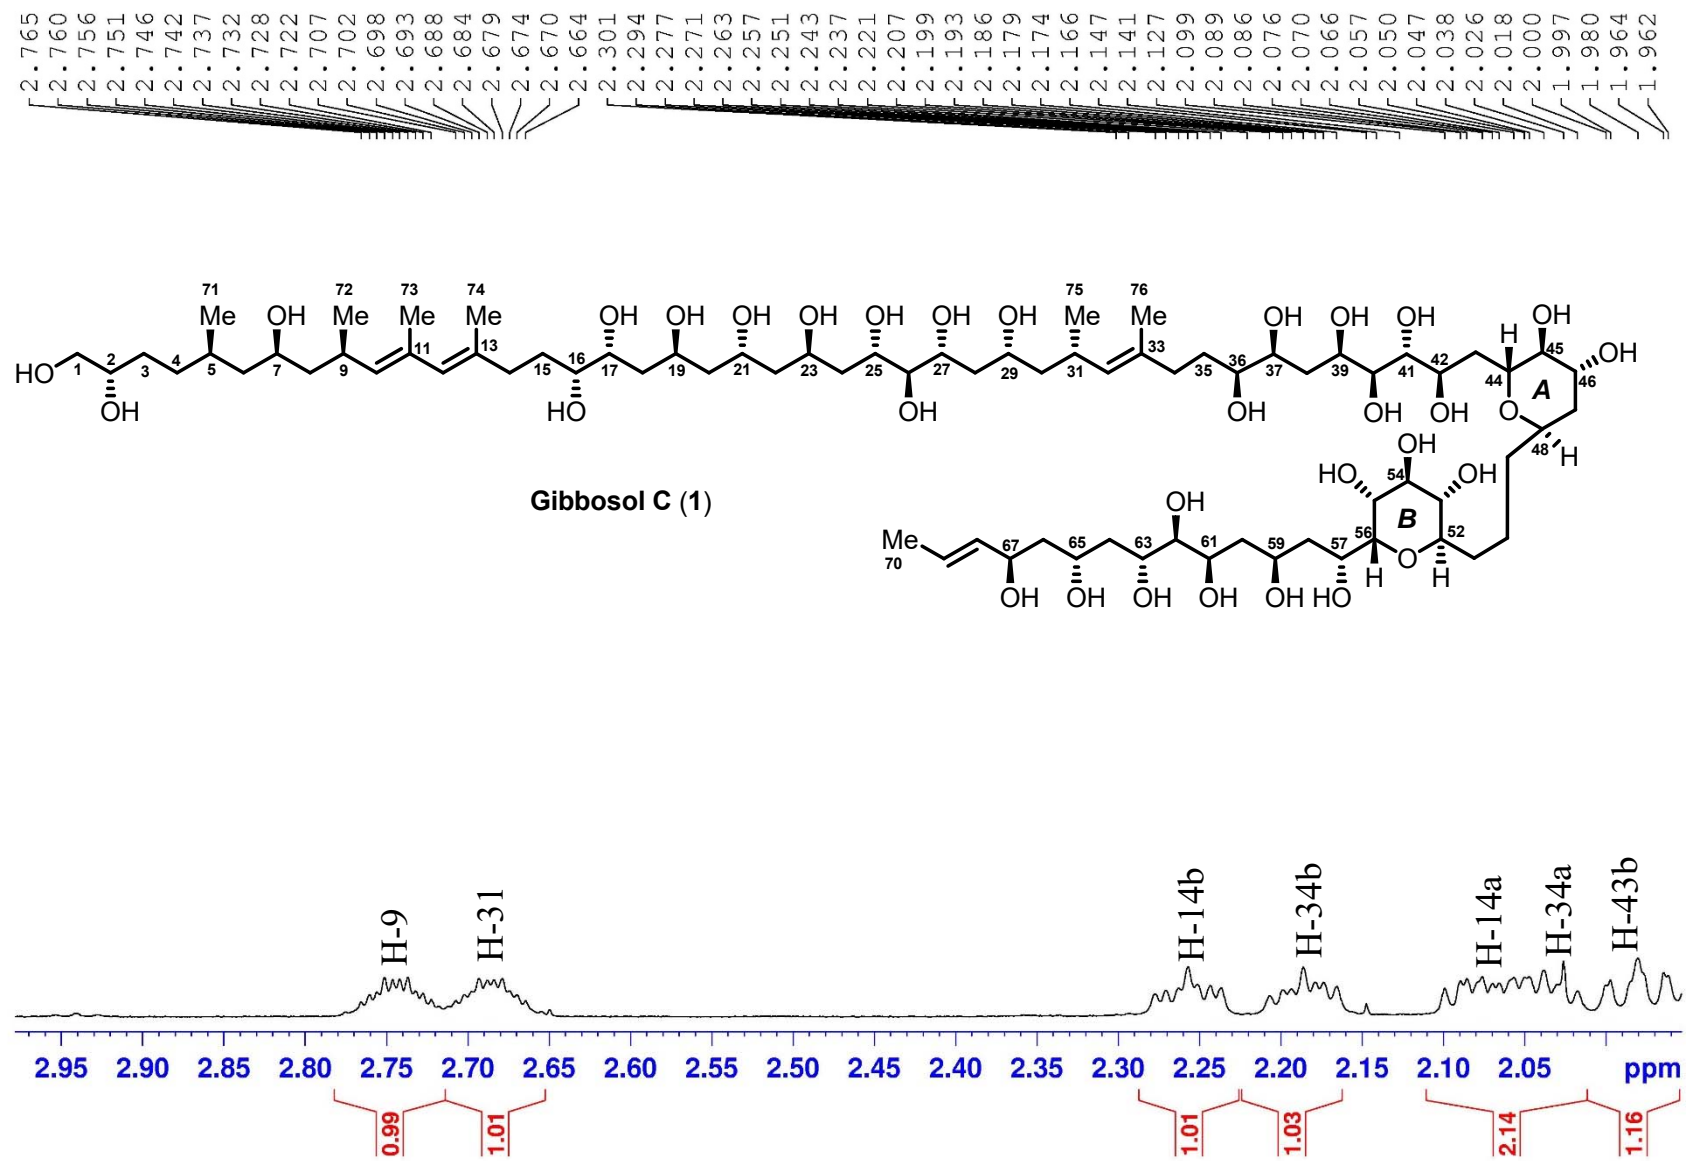

$^1\text{H}$  (700 MHz) NMR spectrum of compound **1** in  $\text{CD}_3\text{OD}$

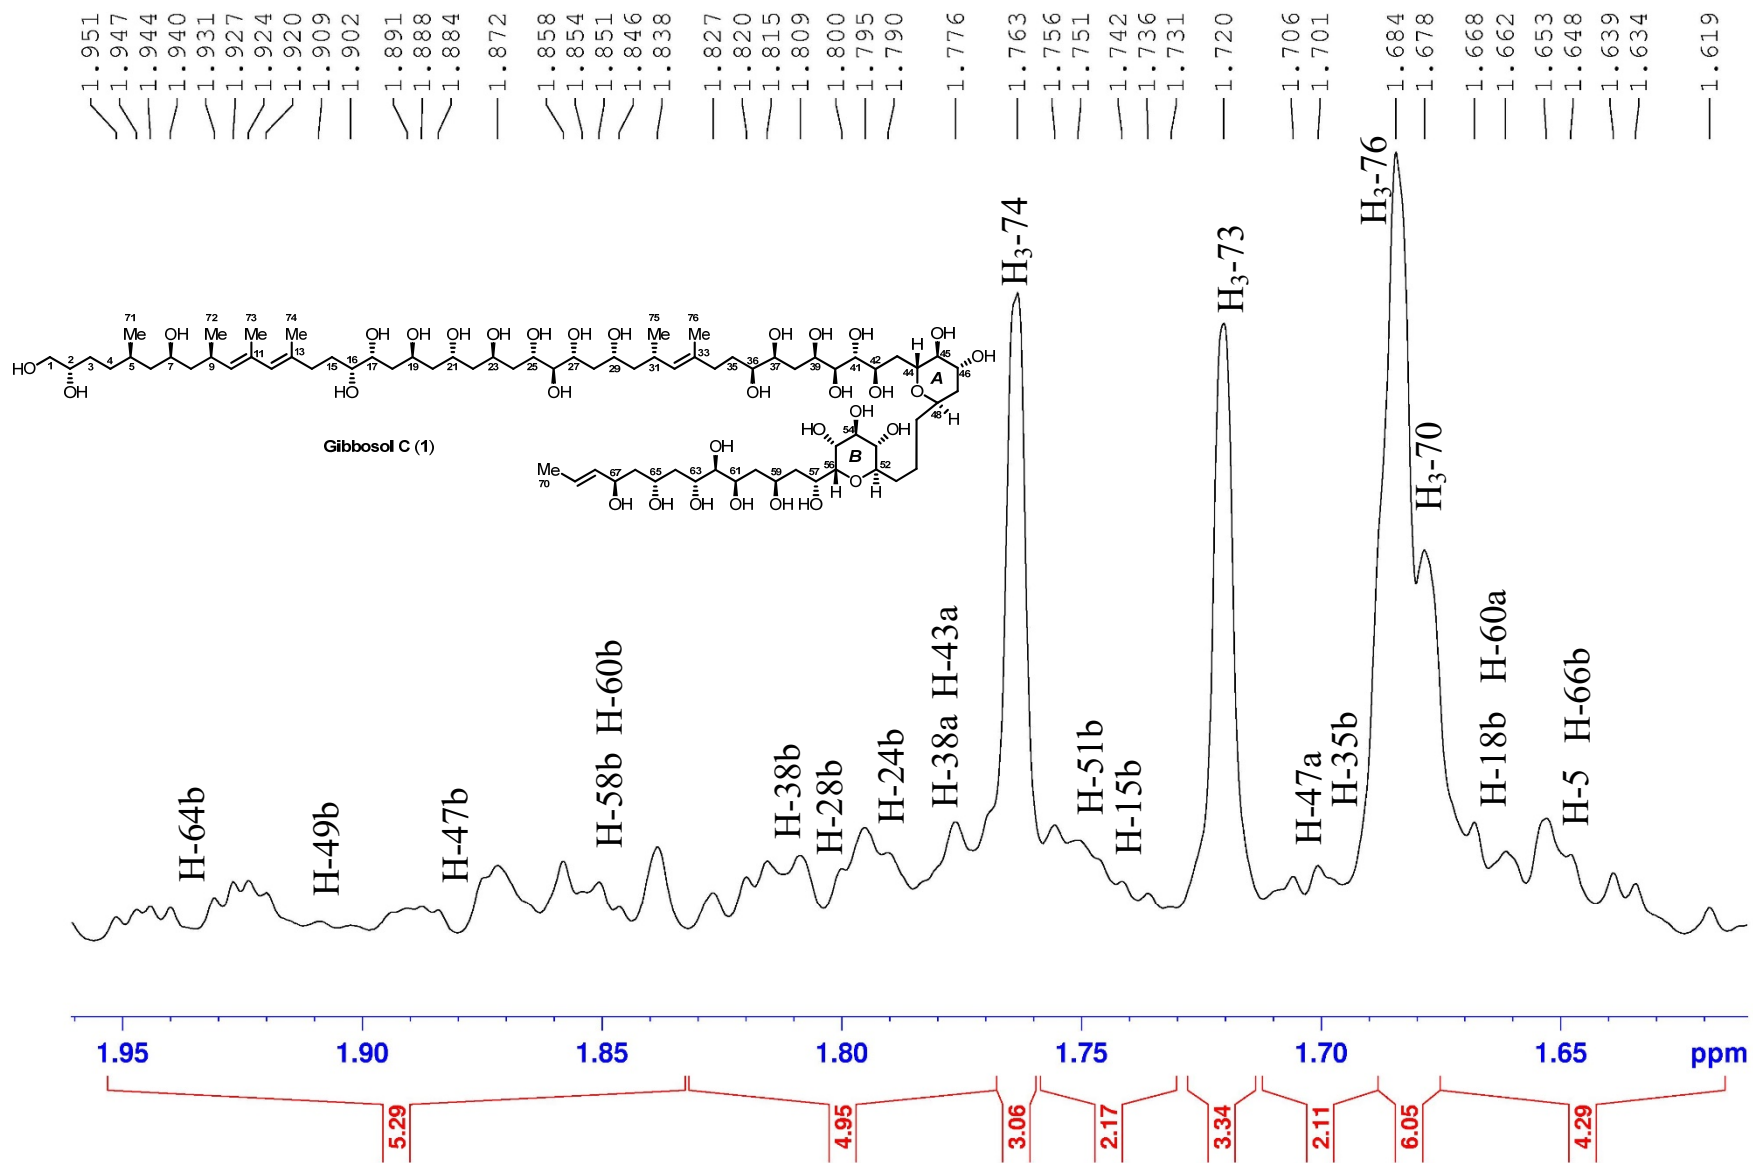

$^1\text{H}$  (700 MHz) NMR spectrum of compound **1** in  $\text{CD}_3\text{OD}$

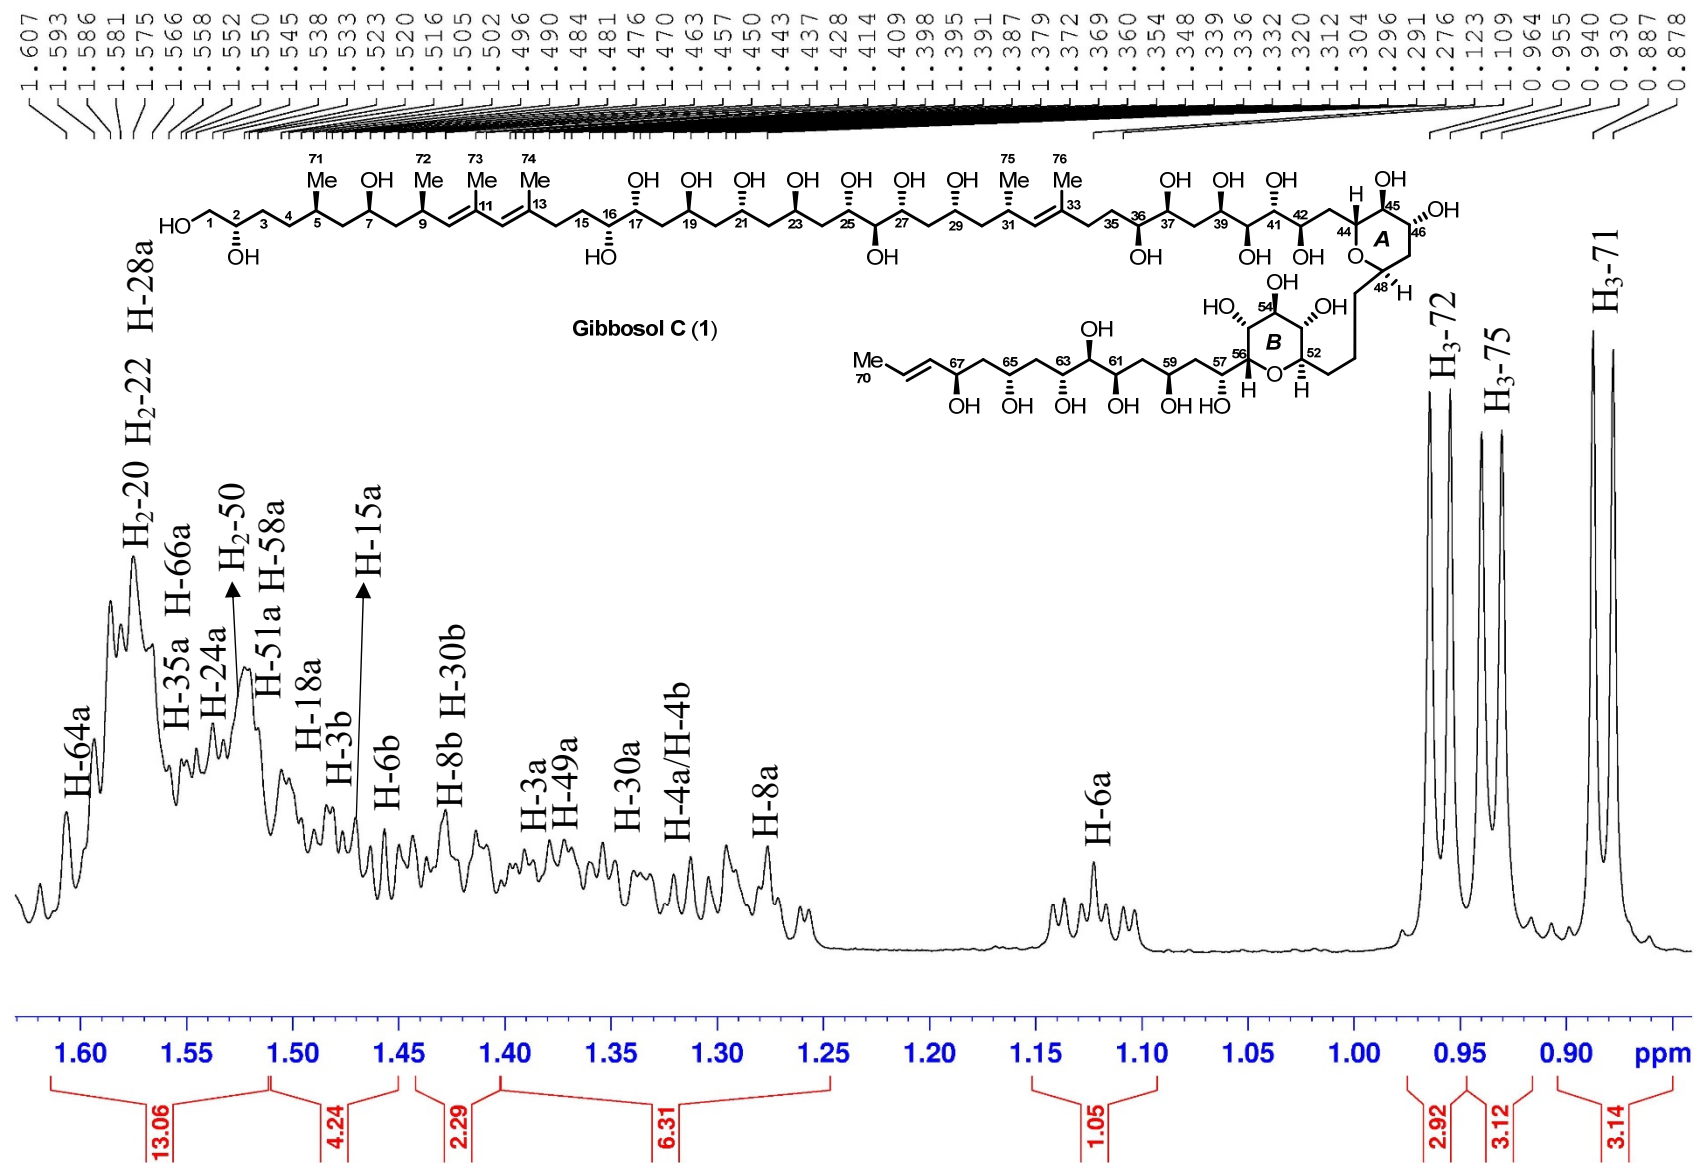

$^{13}\text{C}$  (175 MHz) NMR spectrum of compound **1** in  $\text{CD}_3\text{OD}$

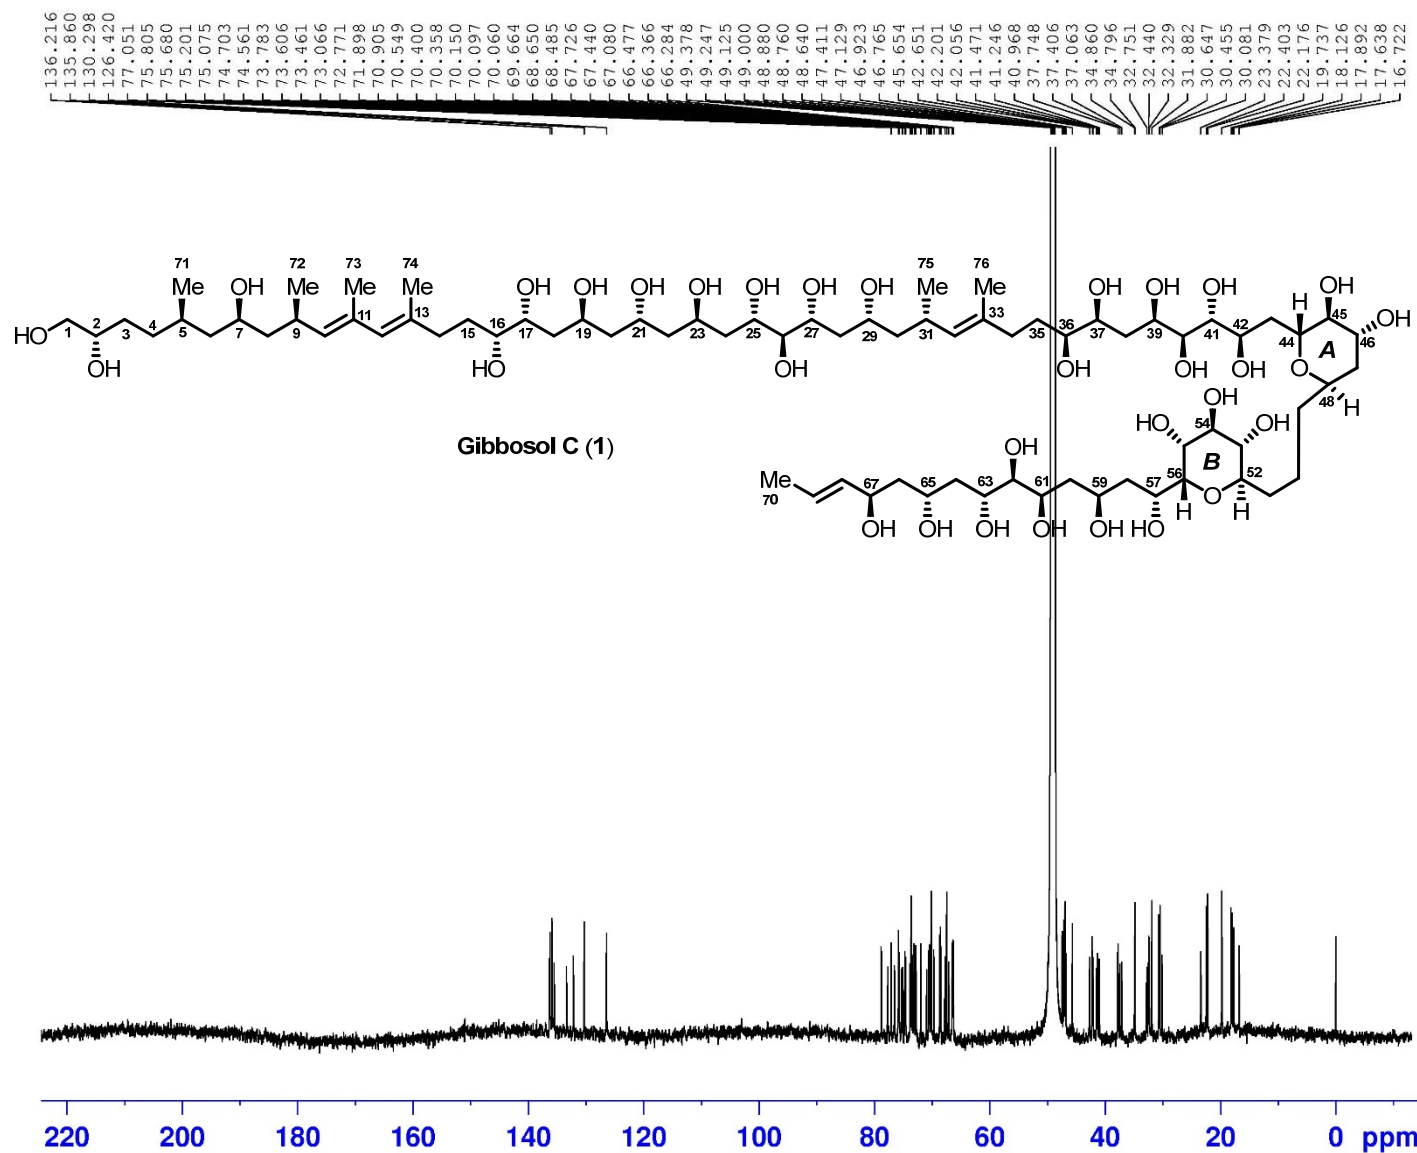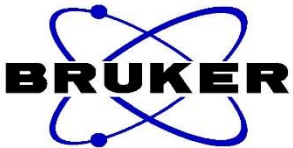

|         |                  |
|---------|------------------|
| NAME    | liwanshan-40-2-2 |
| EXPNO   | 13               |
| PROCNO  | 1                |
| Date_   | 20190507         |
| Time    | 23.49 h          |
| INSTRUM | spect            |
| PROBHD  | Z120187_0028 (   |
| PULPROG | zgpg30           |
| TD      | 32768            |
| SOLVENT | MeOD             |
| NS      | 8000             |
| DS      | 8                |
| SWH     | 43859.648 H:     |
| FIDRES  | 2.676980 H:      |
| AQ      | 0.3736052 s:     |
| RG      | 181.26           |
| DW      | 11.400 u:        |
| DE      | 18.00 u:         |
| TE      | 298.0 K          |
| D1      | 1.00000000 s:    |
| D11     | 0.03000000 s:    |
| TD0     | 1                |
| SFO1    | 176.0797677 M:   |
| NUC1    | 13C              |
| P1      | 11.90 u:         |
| SI      | 32768            |
| SF      | 176.0601526 M:   |
| WDW     | EM               |
| SSB     | 0                |
| LB      | 5.00 H:          |
| GB      | 0                |
| PC      | 1.40             |

$^{13}\text{C}$  (175 MHz) NMR spectrum of compound **1** in  $\text{CD}_3\text{OD}$

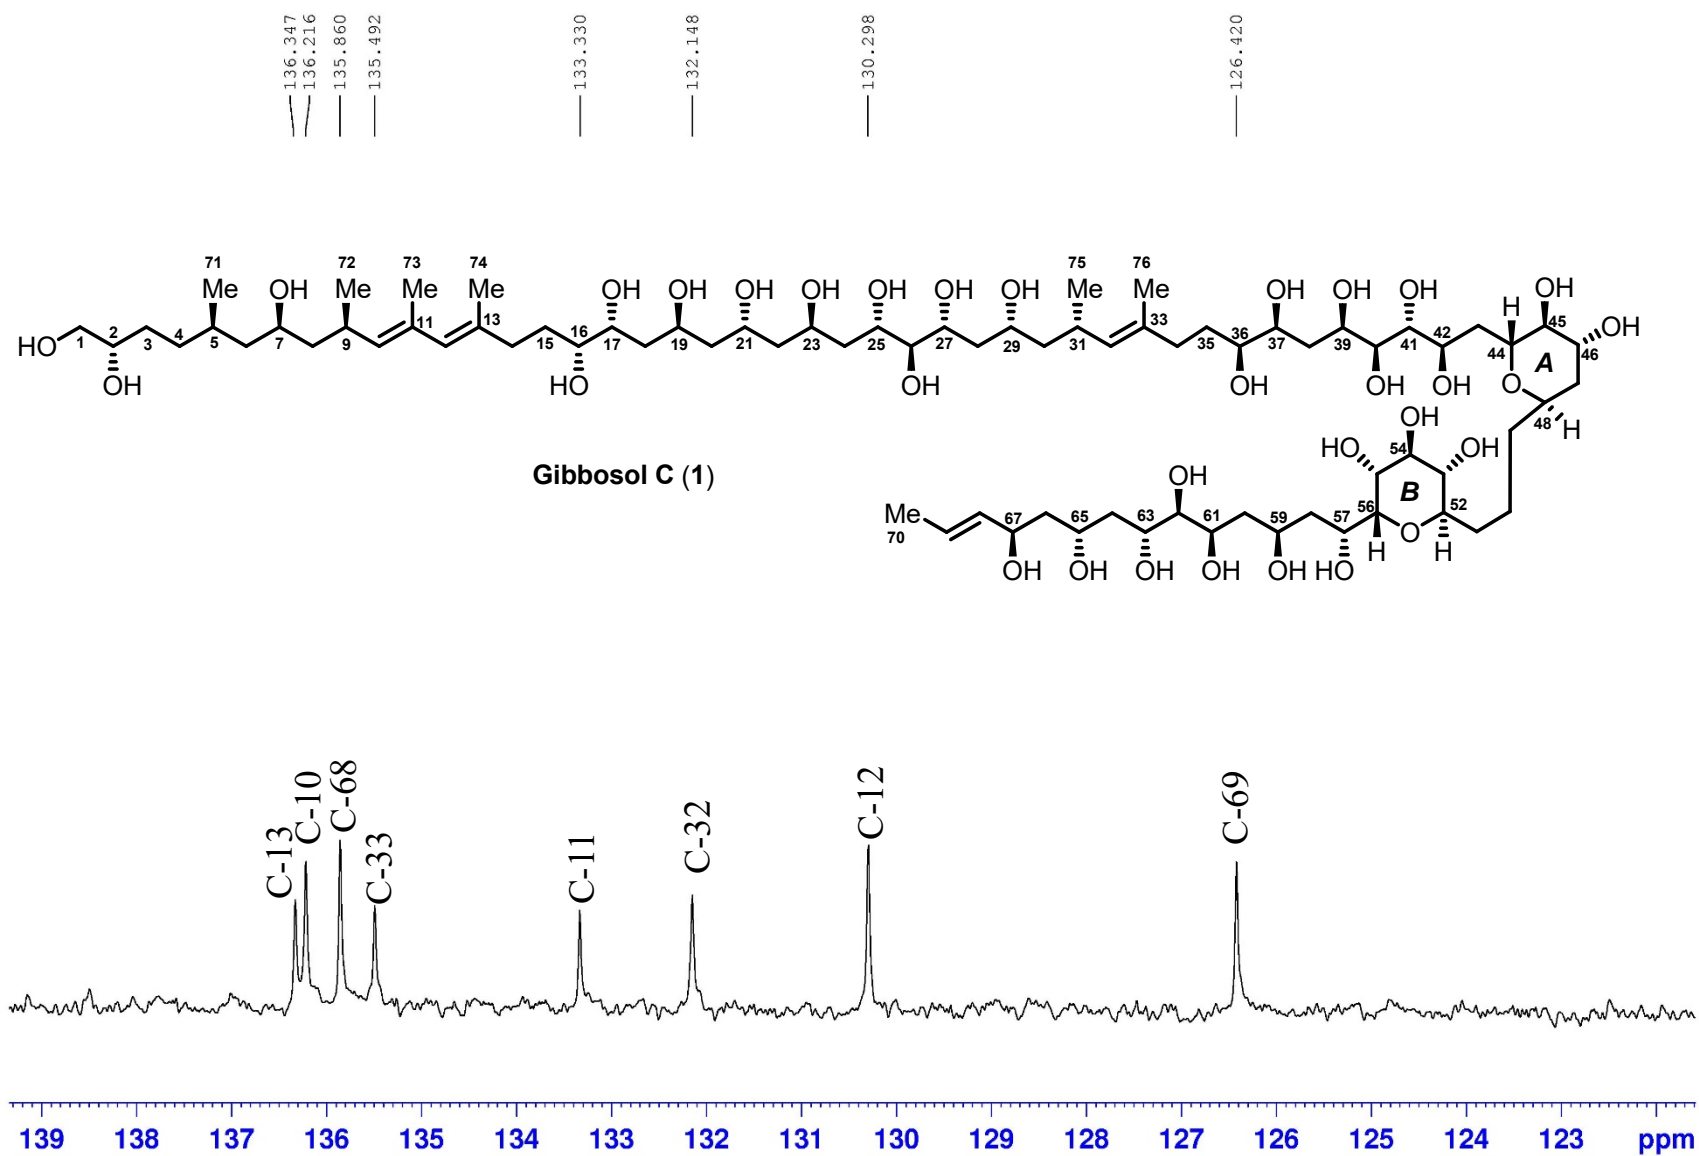

$^{13}\text{C}$  (175 MHz) NMR spectrum of compound **1** in  $\text{CD}_3\text{OD}$

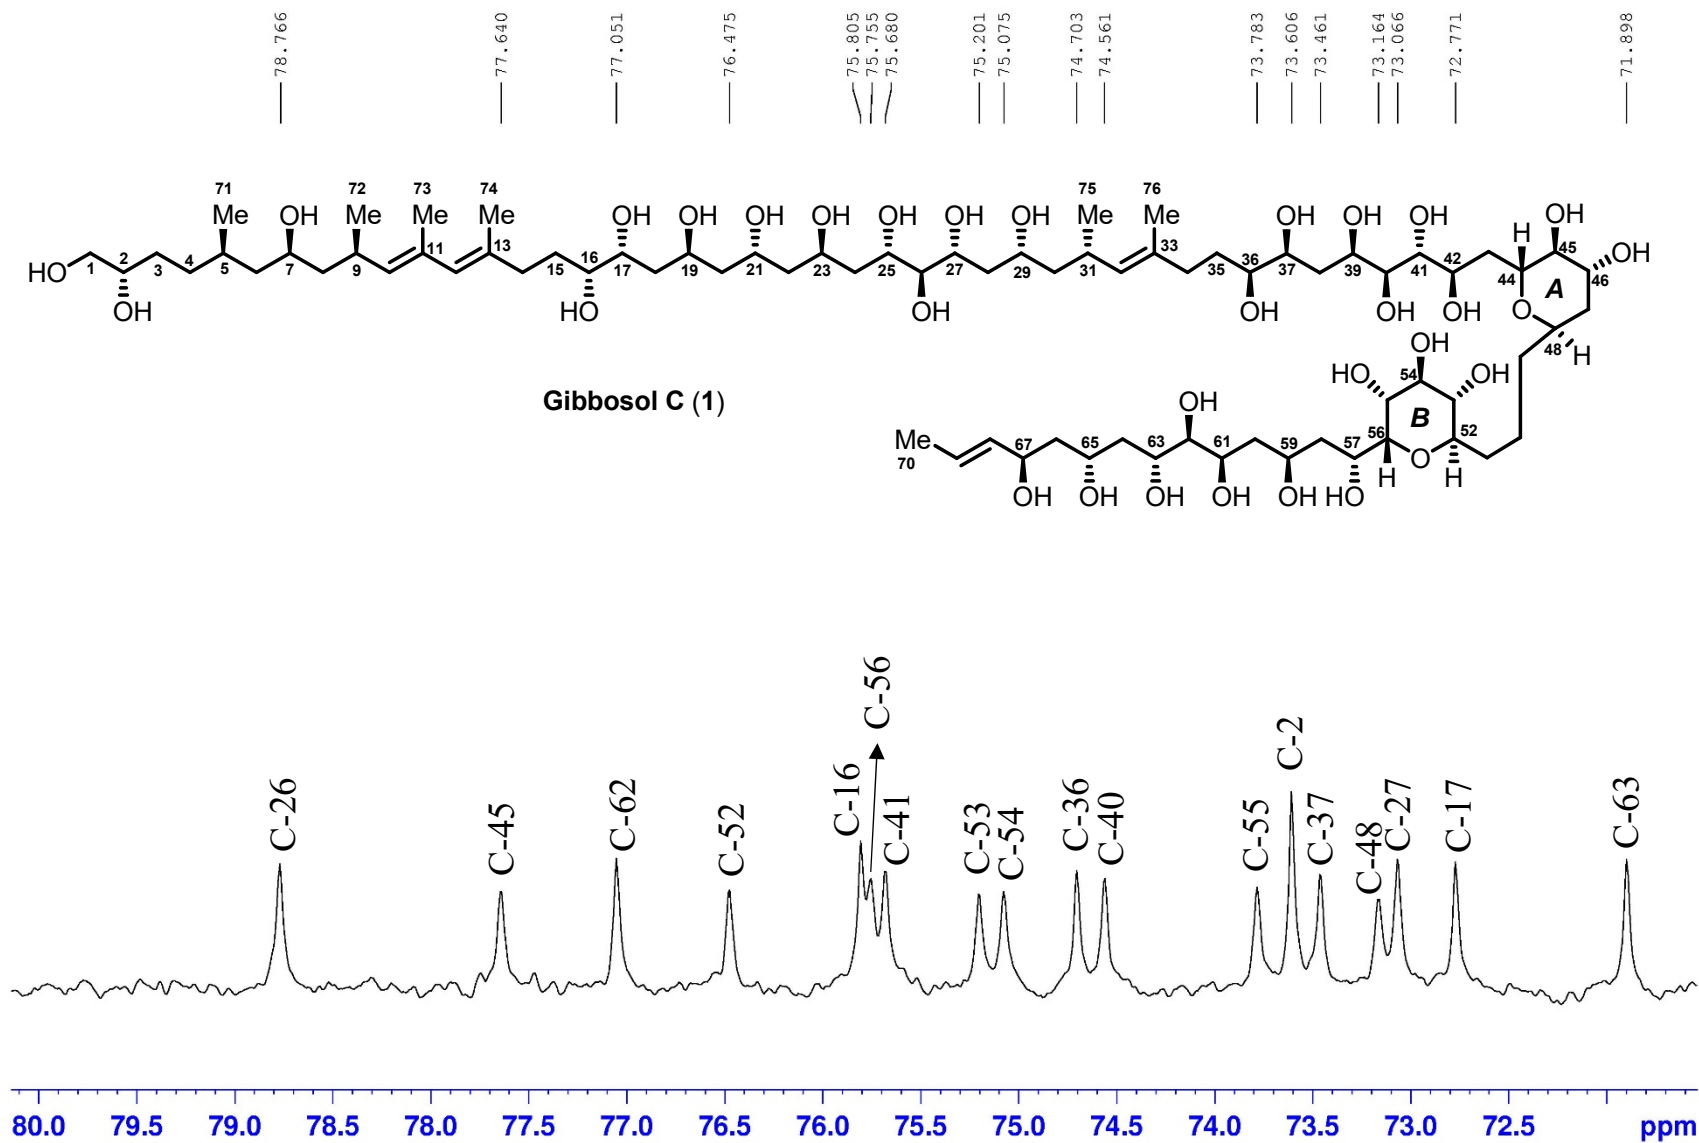

$^{13}\text{C}$  (175 MHz) NMR spectrum of compound **1** in  $\text{CD}_3\text{OD}$

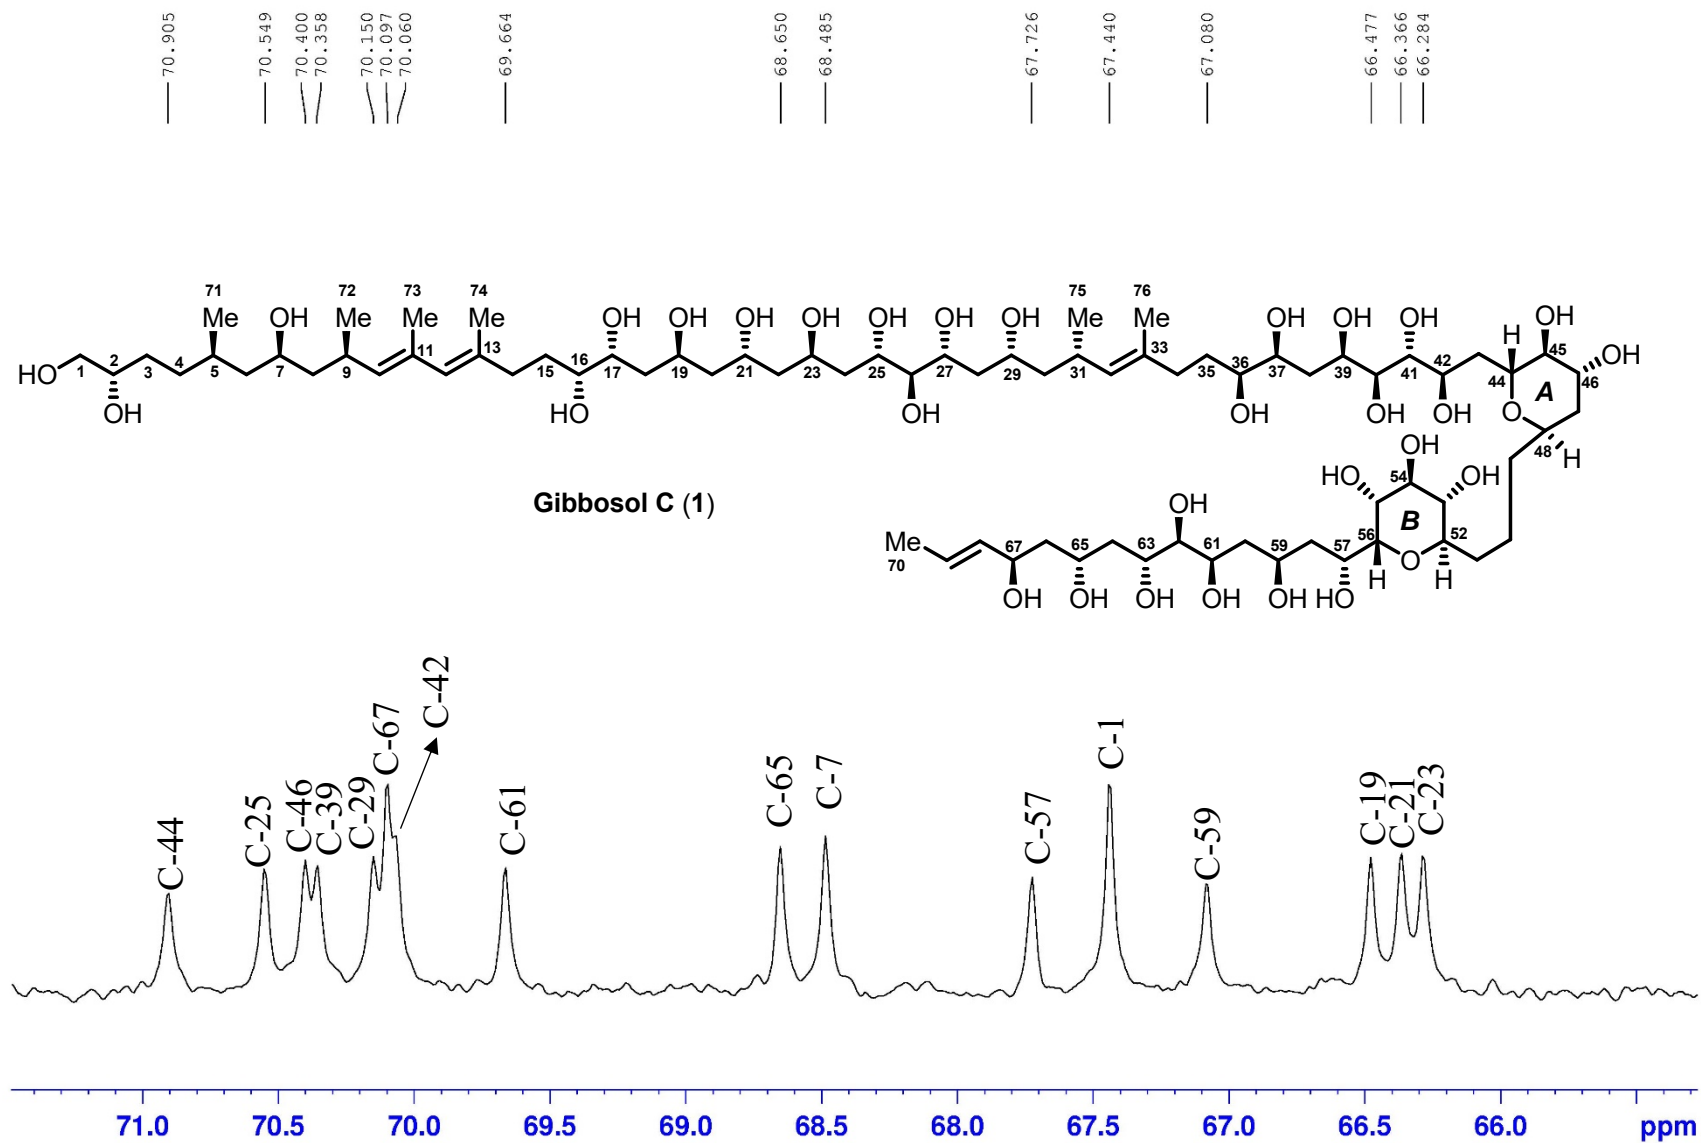



$^{13}\text{C}$  (175 MHz) NMR spectrum of compound **1** in  $\text{CD}_3\text{OD}$

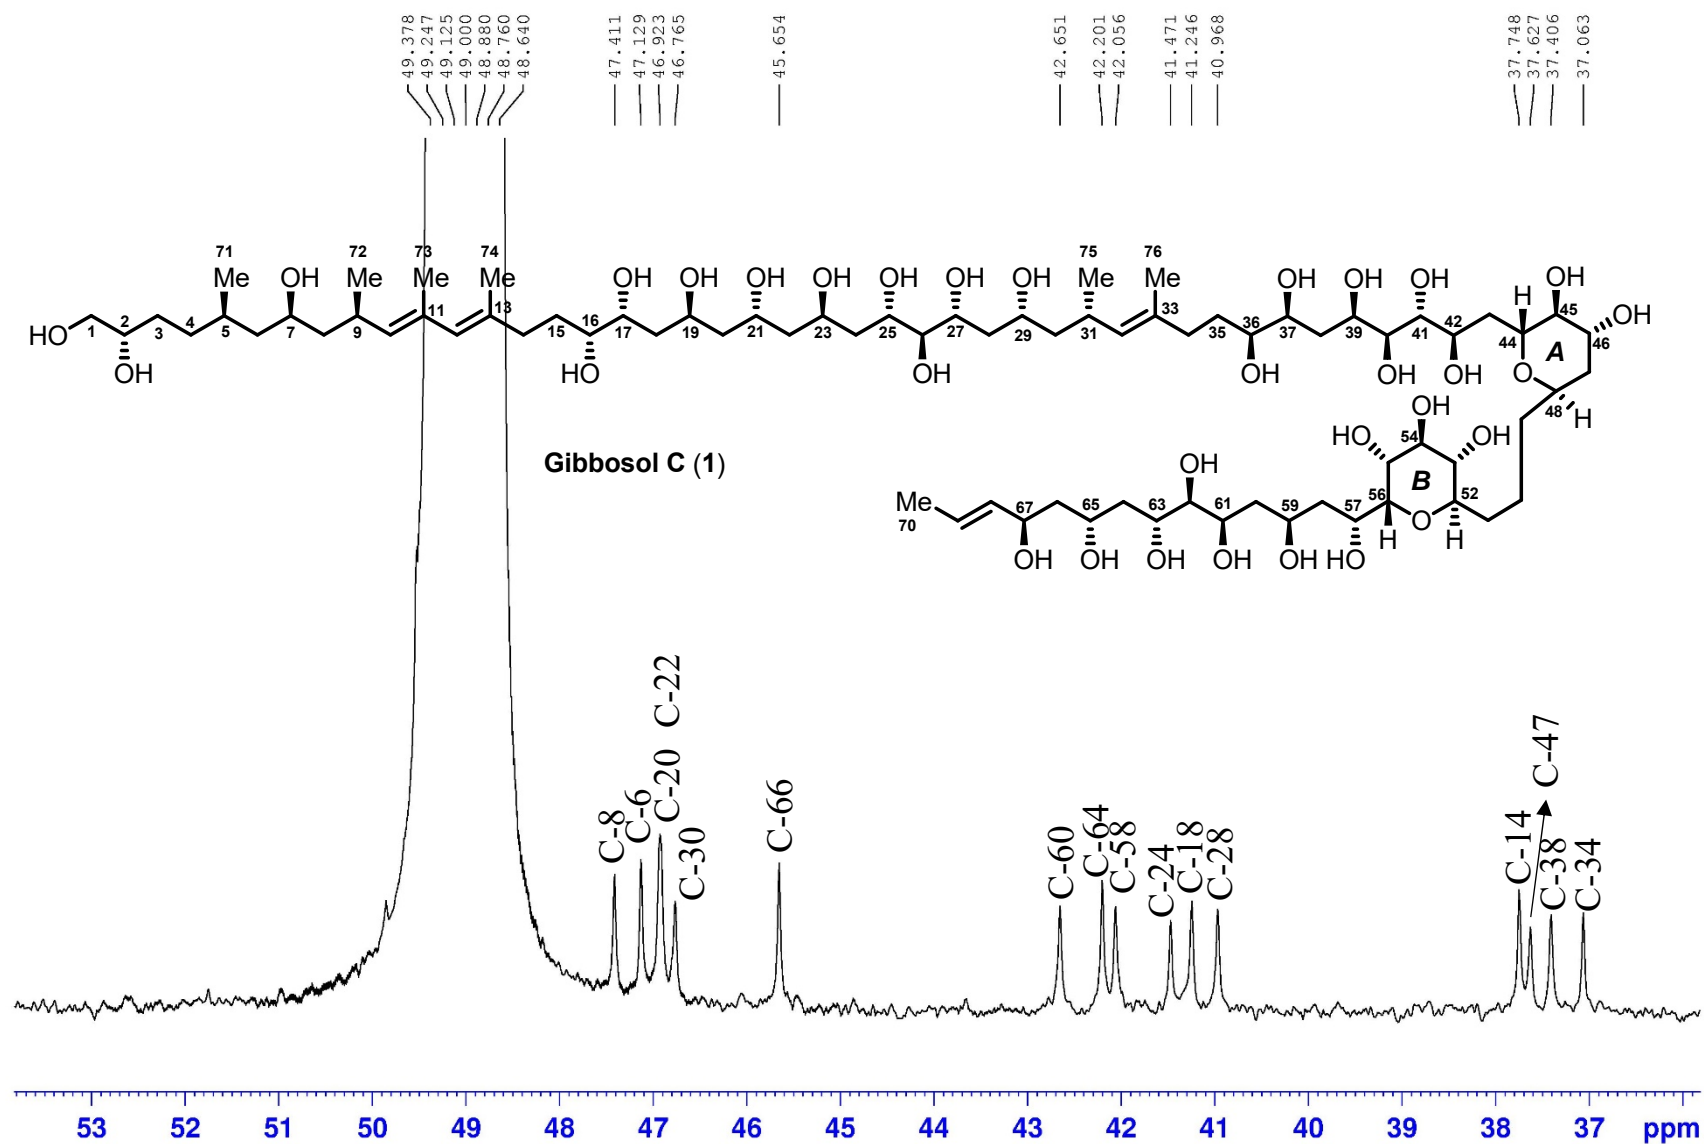

$^{13}\text{C}$  (175 MHz) NMR spectrum of compound **1** in  $\text{CD}_3\text{OD}$

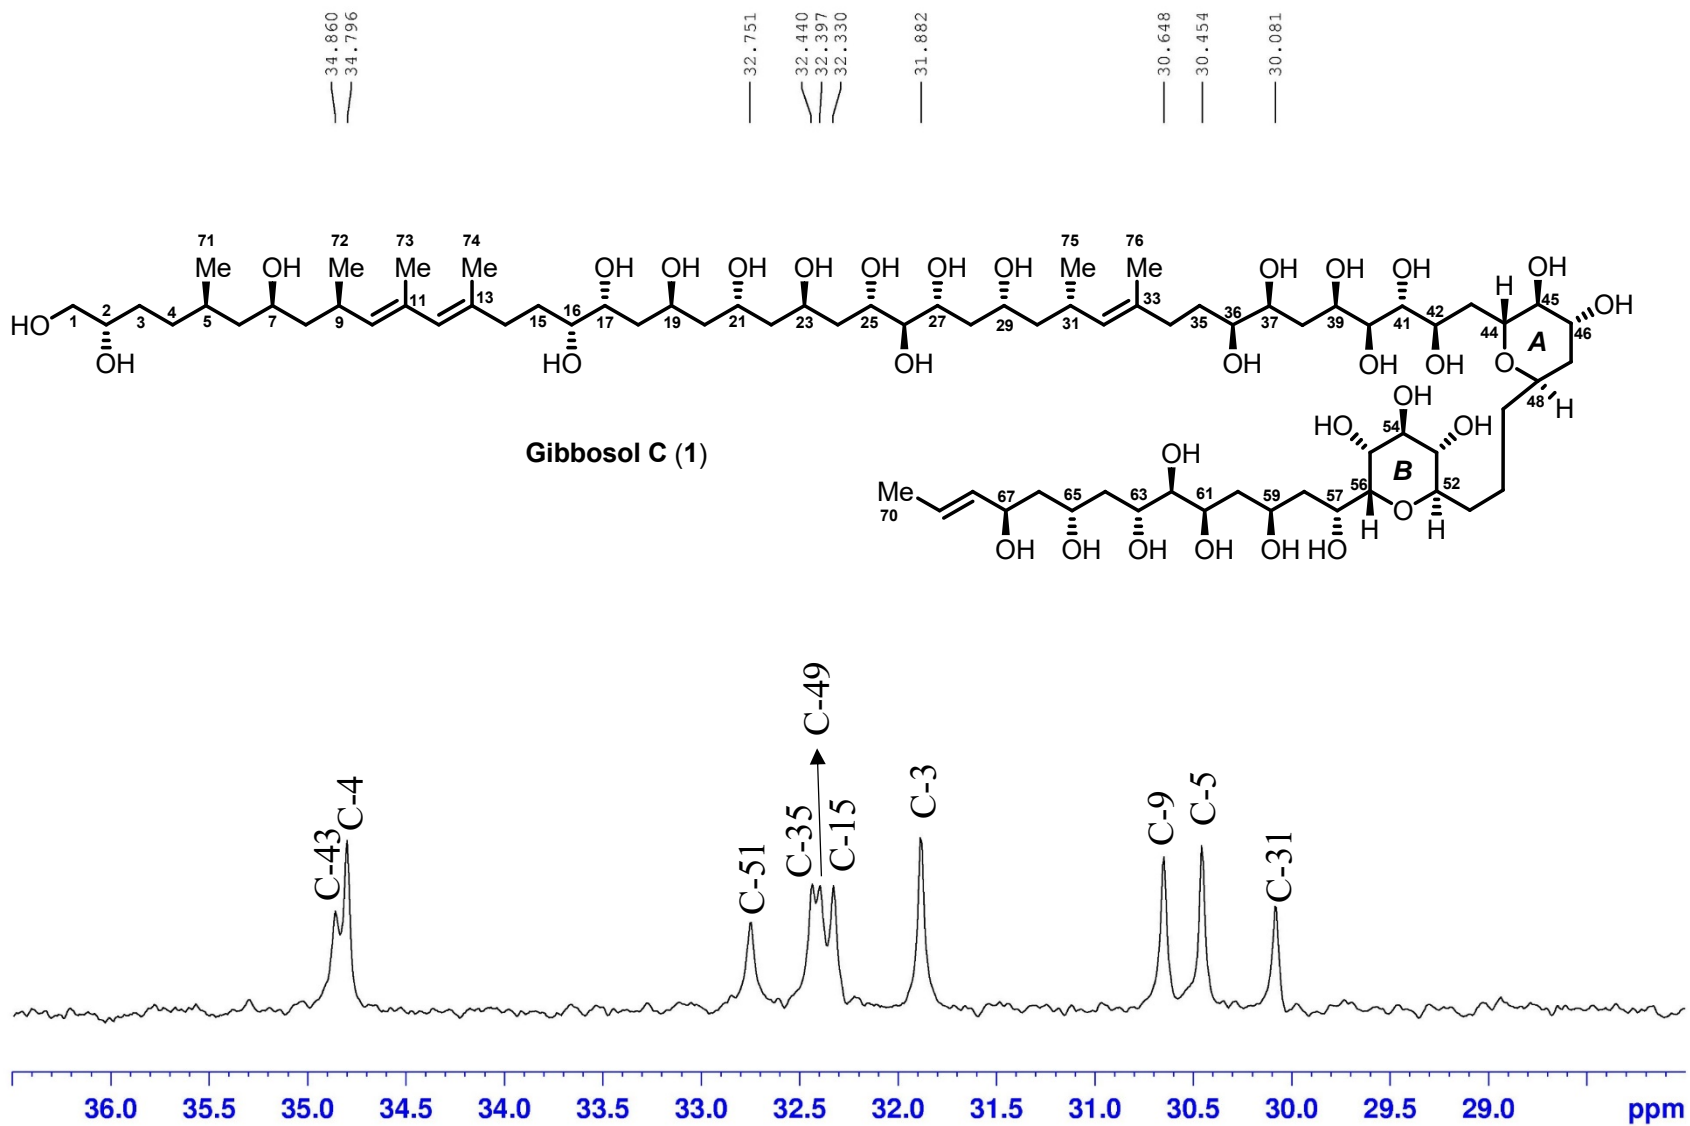

$^{13}\text{C}$  (175 MHz) NMR spectrum of compound **1** in  $\text{CD}_3\text{OD}$

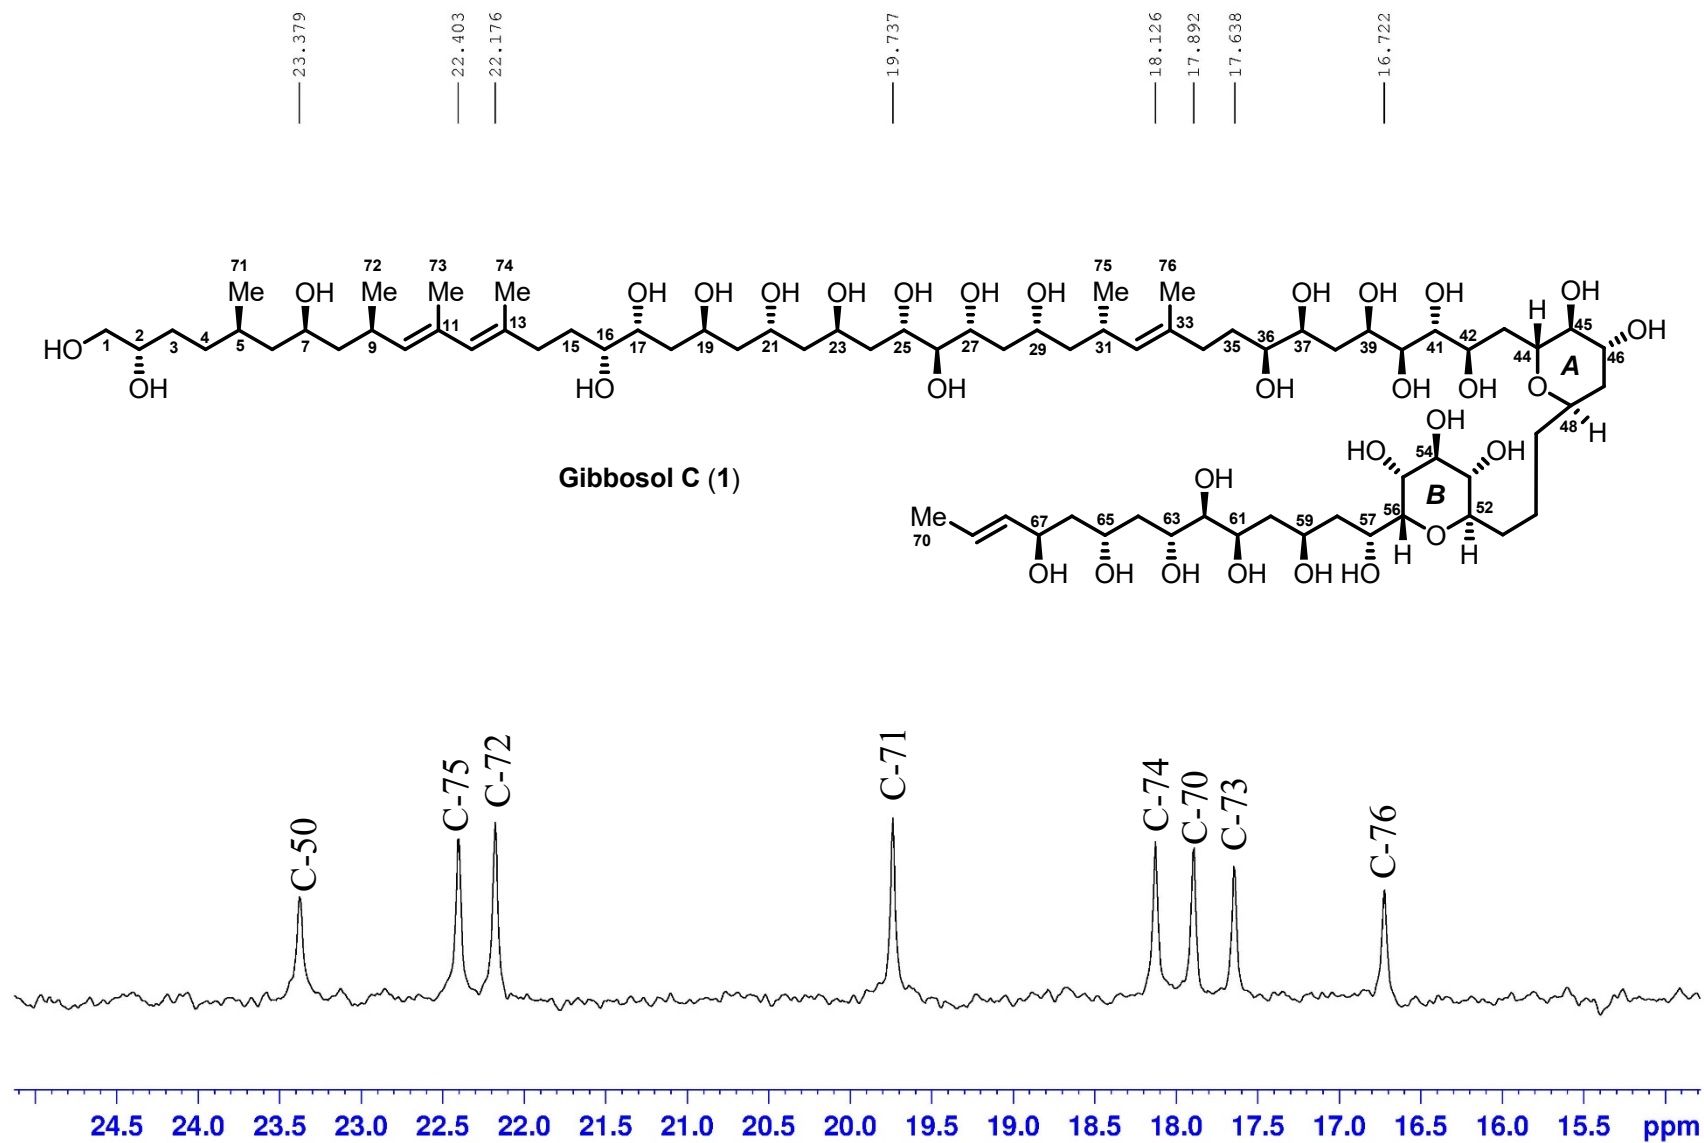

# DEPT135 (175 MHz) spectrum of compound 1 in CD<sub>3</sub>OD

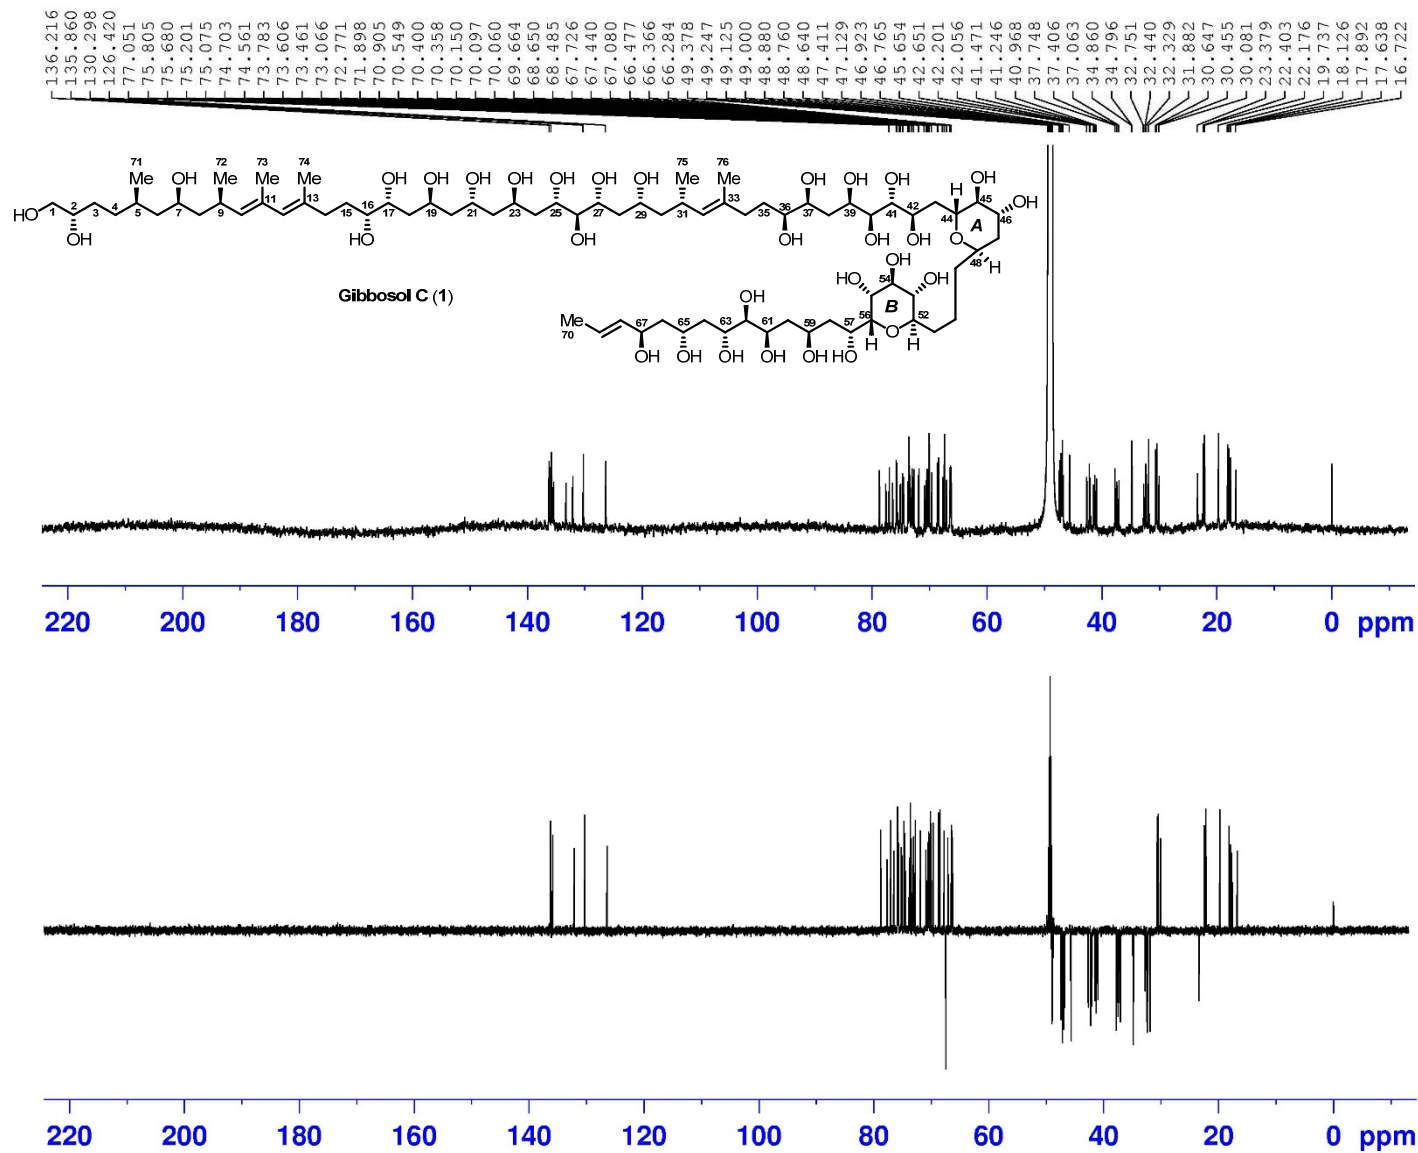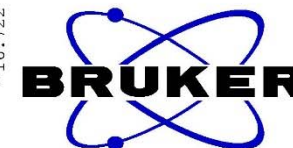

```

NAME      liwanshan-40-2-2
EXPNO     14
PROCNO    1
Date_     20190508
Time      1.25 h
INSTRUM   spect
PROBHD    Z120187_0028 (
PULPROG   deptspl35
TD         32768
SOLVENT   MeOD
NS         4000
DS         8
SWH        43859.648 F
FIDRES     2.676980 F
AQ         0.3736052 s
RG         181.26
DW         11.400 u
DE         18.00 u
TE         298.0 F
CNST2     145.0000000
D1         1.0000000 s
D2         0.00344828 s
D12        0.00002000 s
TD0        1
SF01      176.0797677 M
NUC1       13C
P1         11.90 u
P13        2000.00 u
SI         32768
SF         176.0601540 M
WDW        EM
SSB        0
LB         1.00 F
GB         0
PC         1.40
    
```

# DEPT135 (175 MHz) spectrum of compound **1** in CD<sub>3</sub>OD

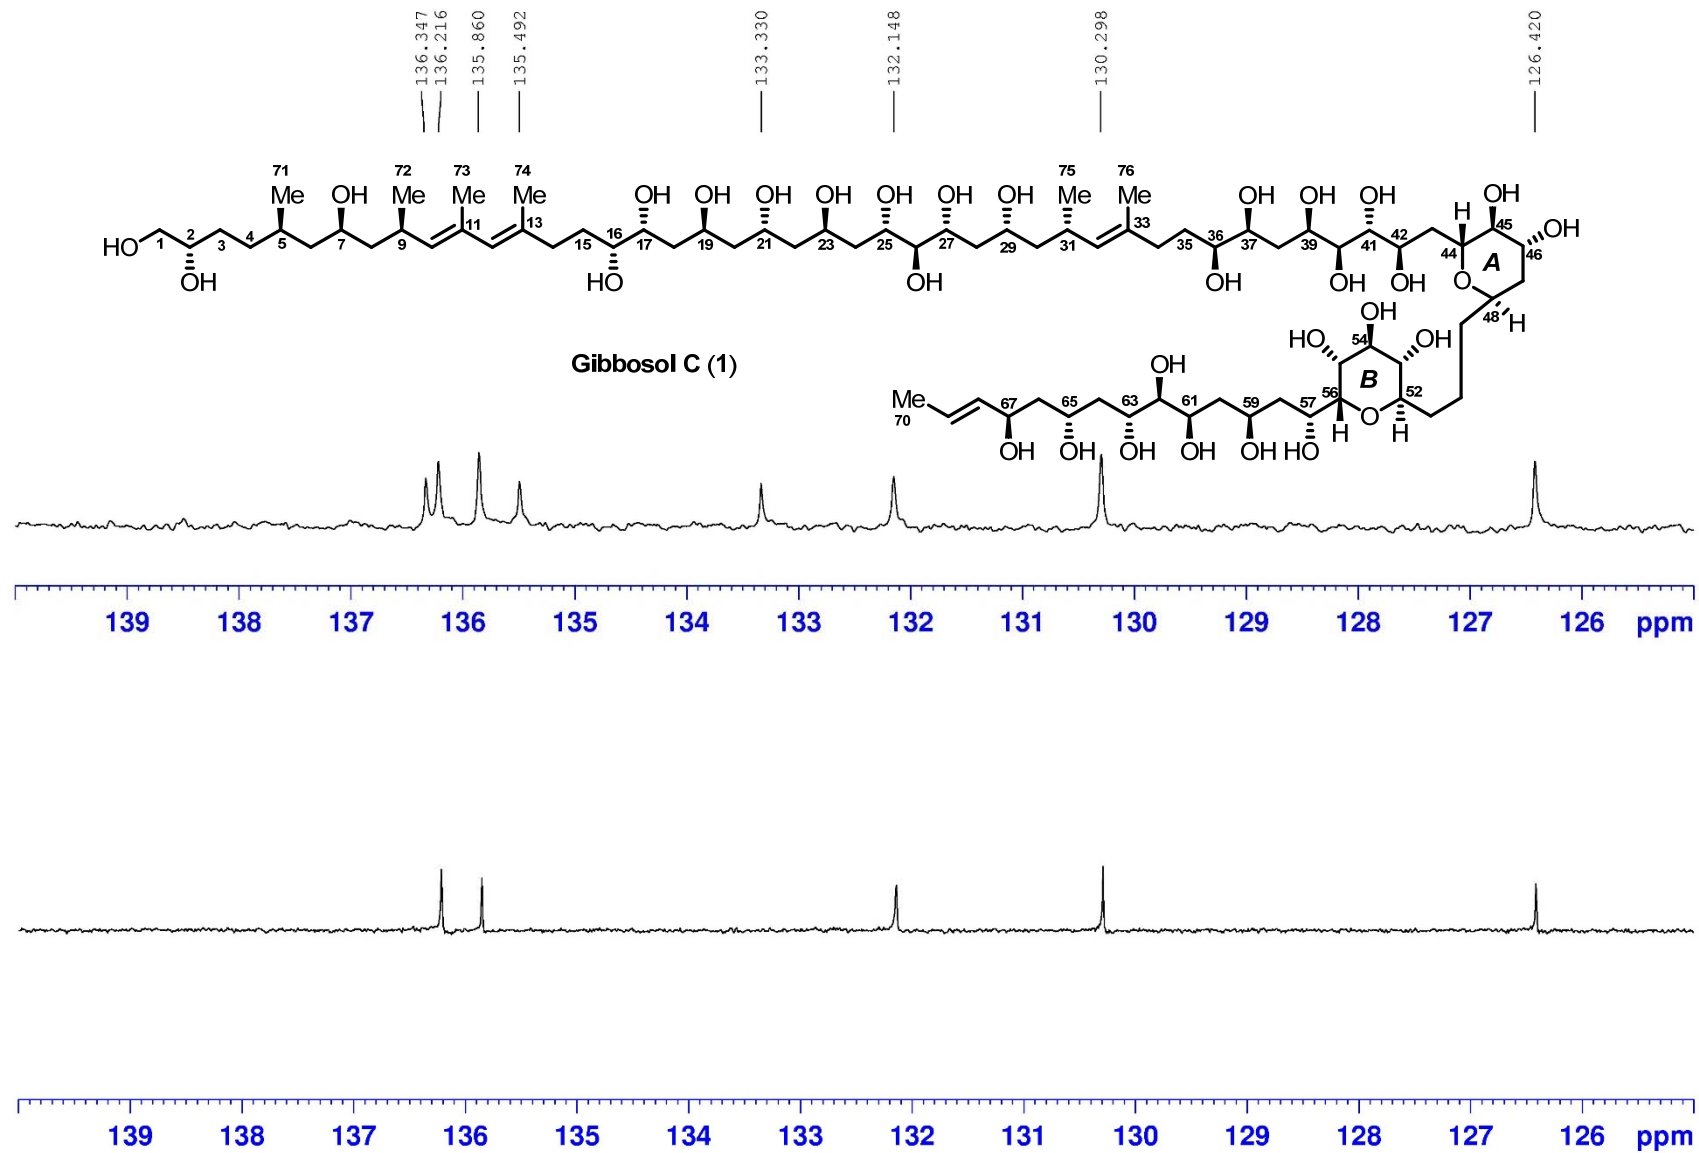

# DEPT135 (175 MHz) spectrum of compound 1 in CD<sub>3</sub>OD

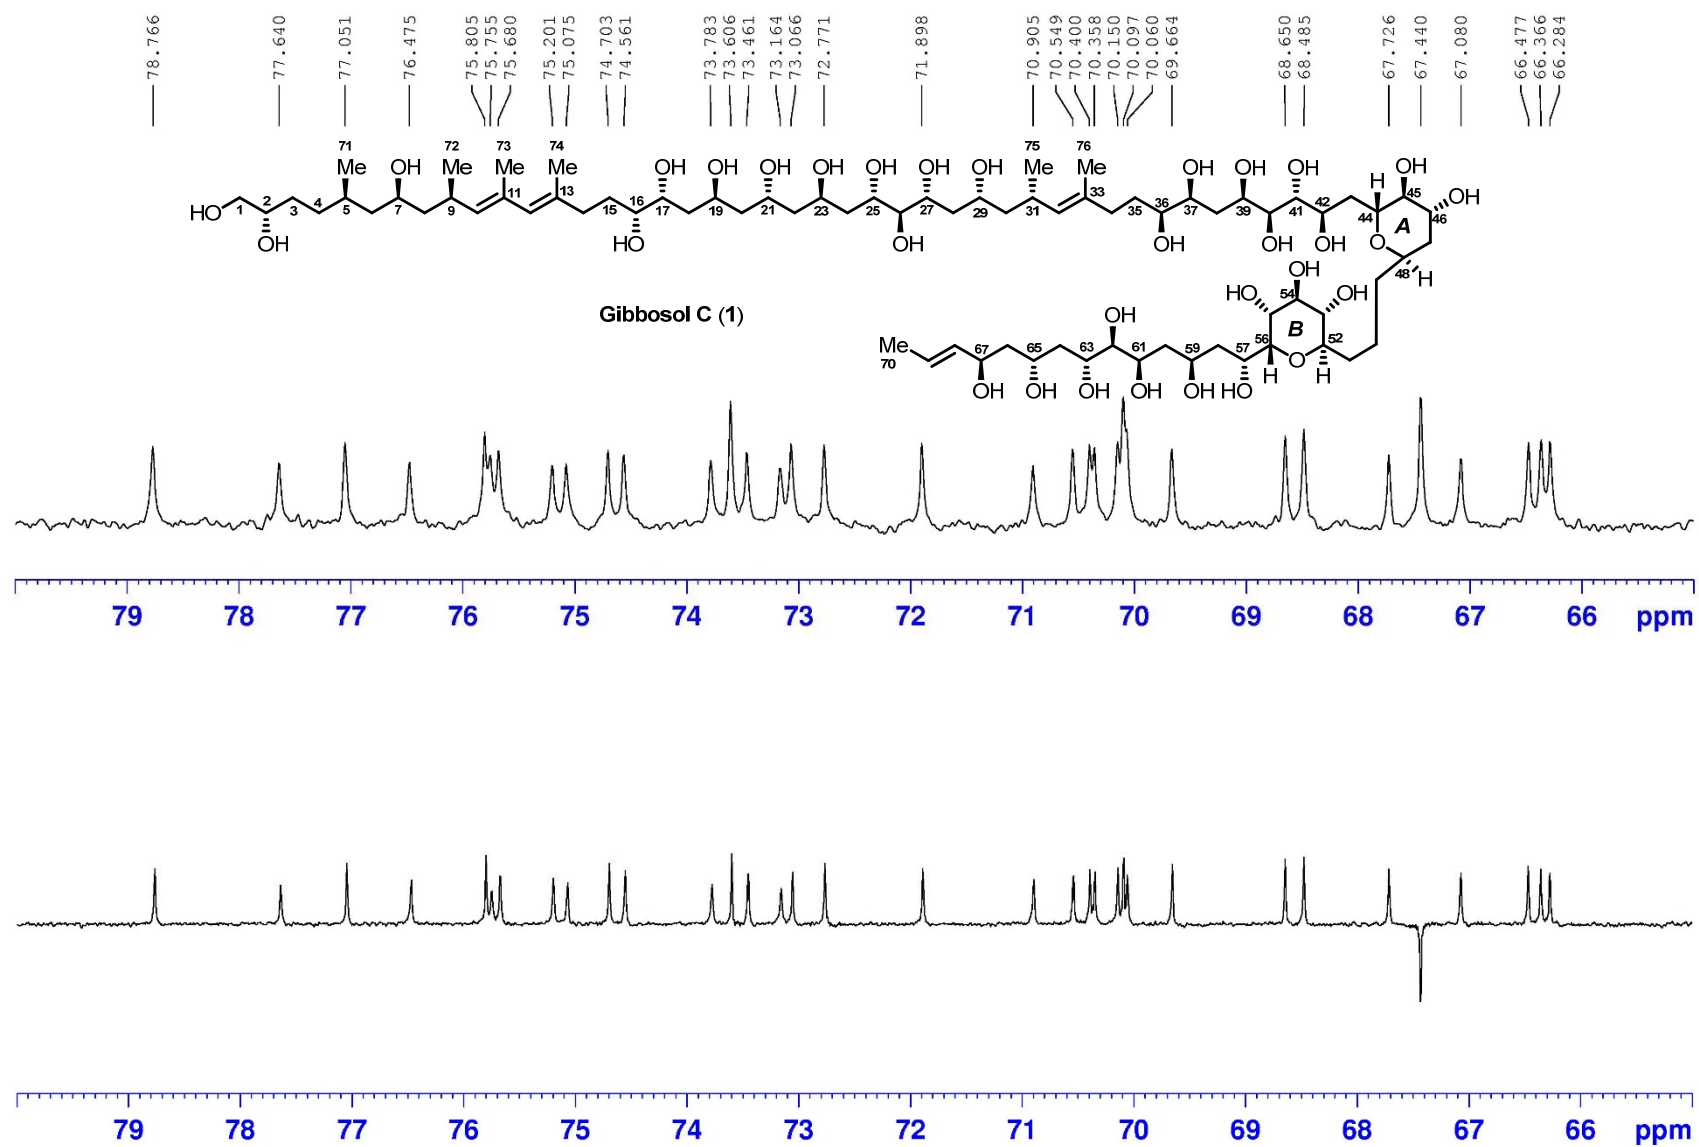

# DEPT135 (175 MHz) spectrum of compound **1** in CD<sub>3</sub>OD

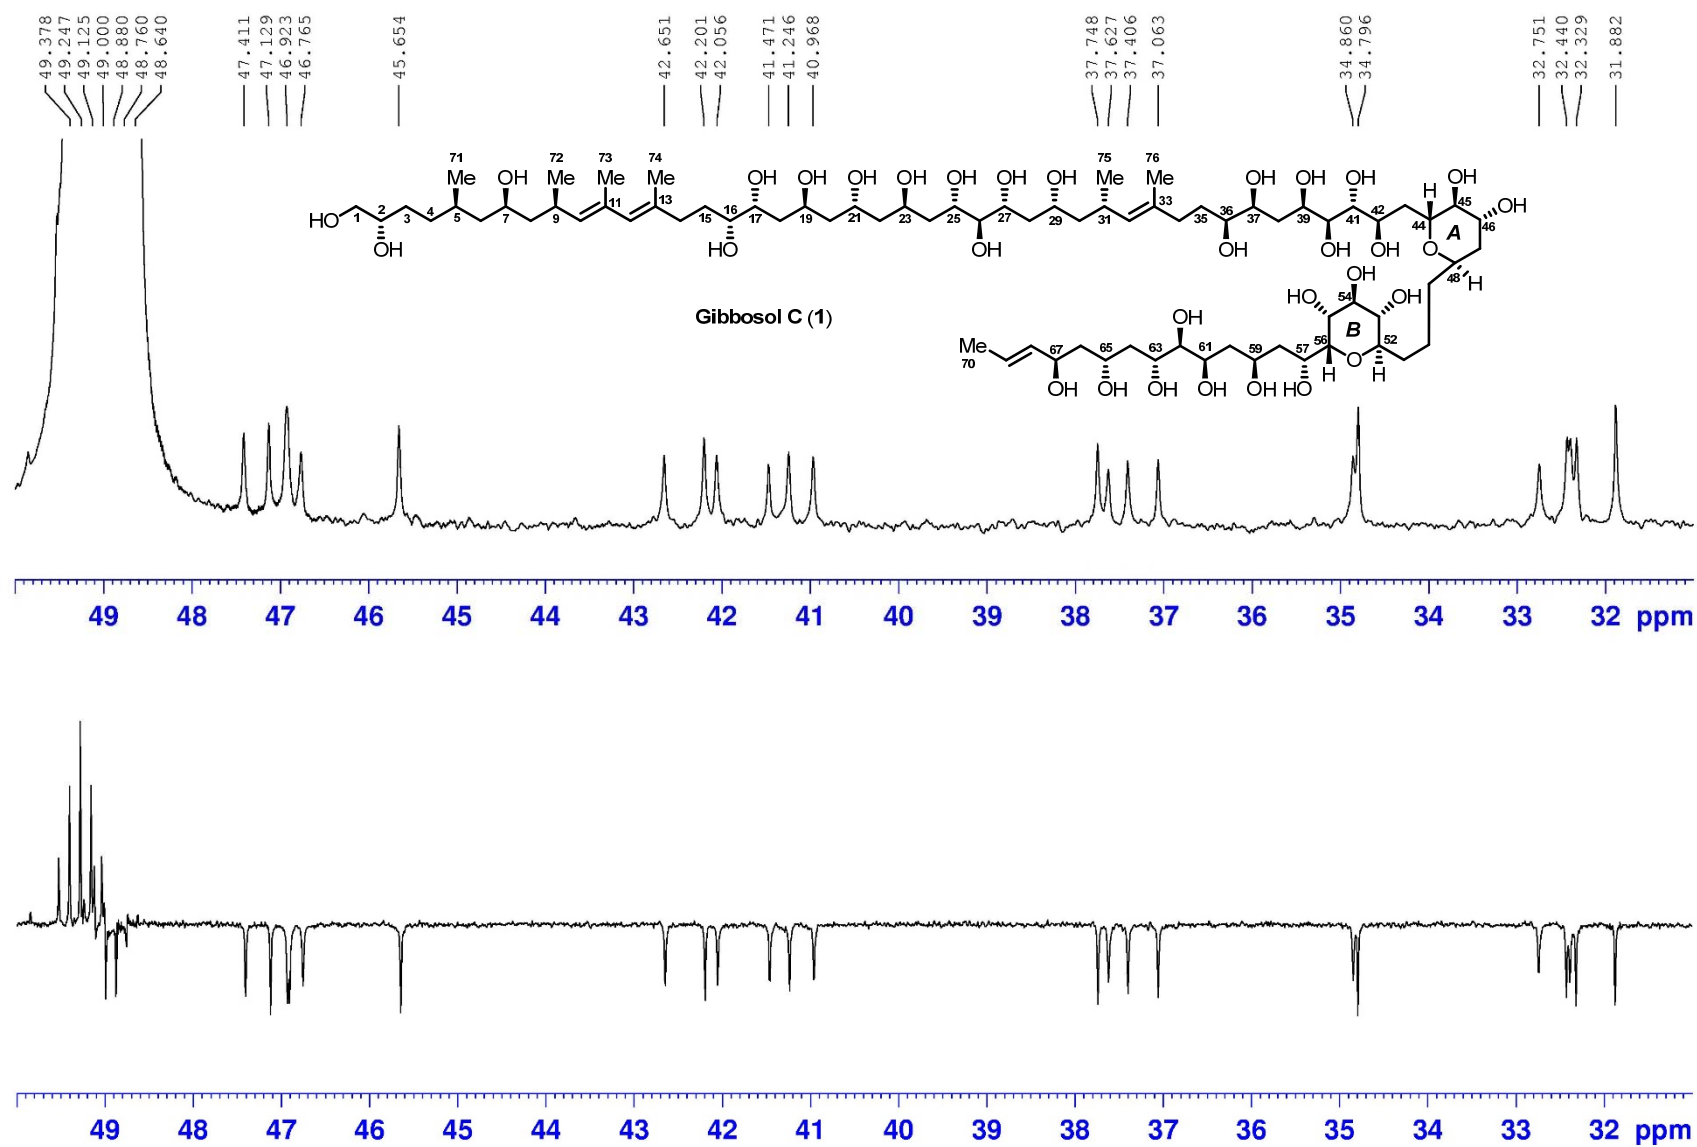

# DEPT135 (175 MHz) spectrum of compound **1** in CD<sub>3</sub>OD

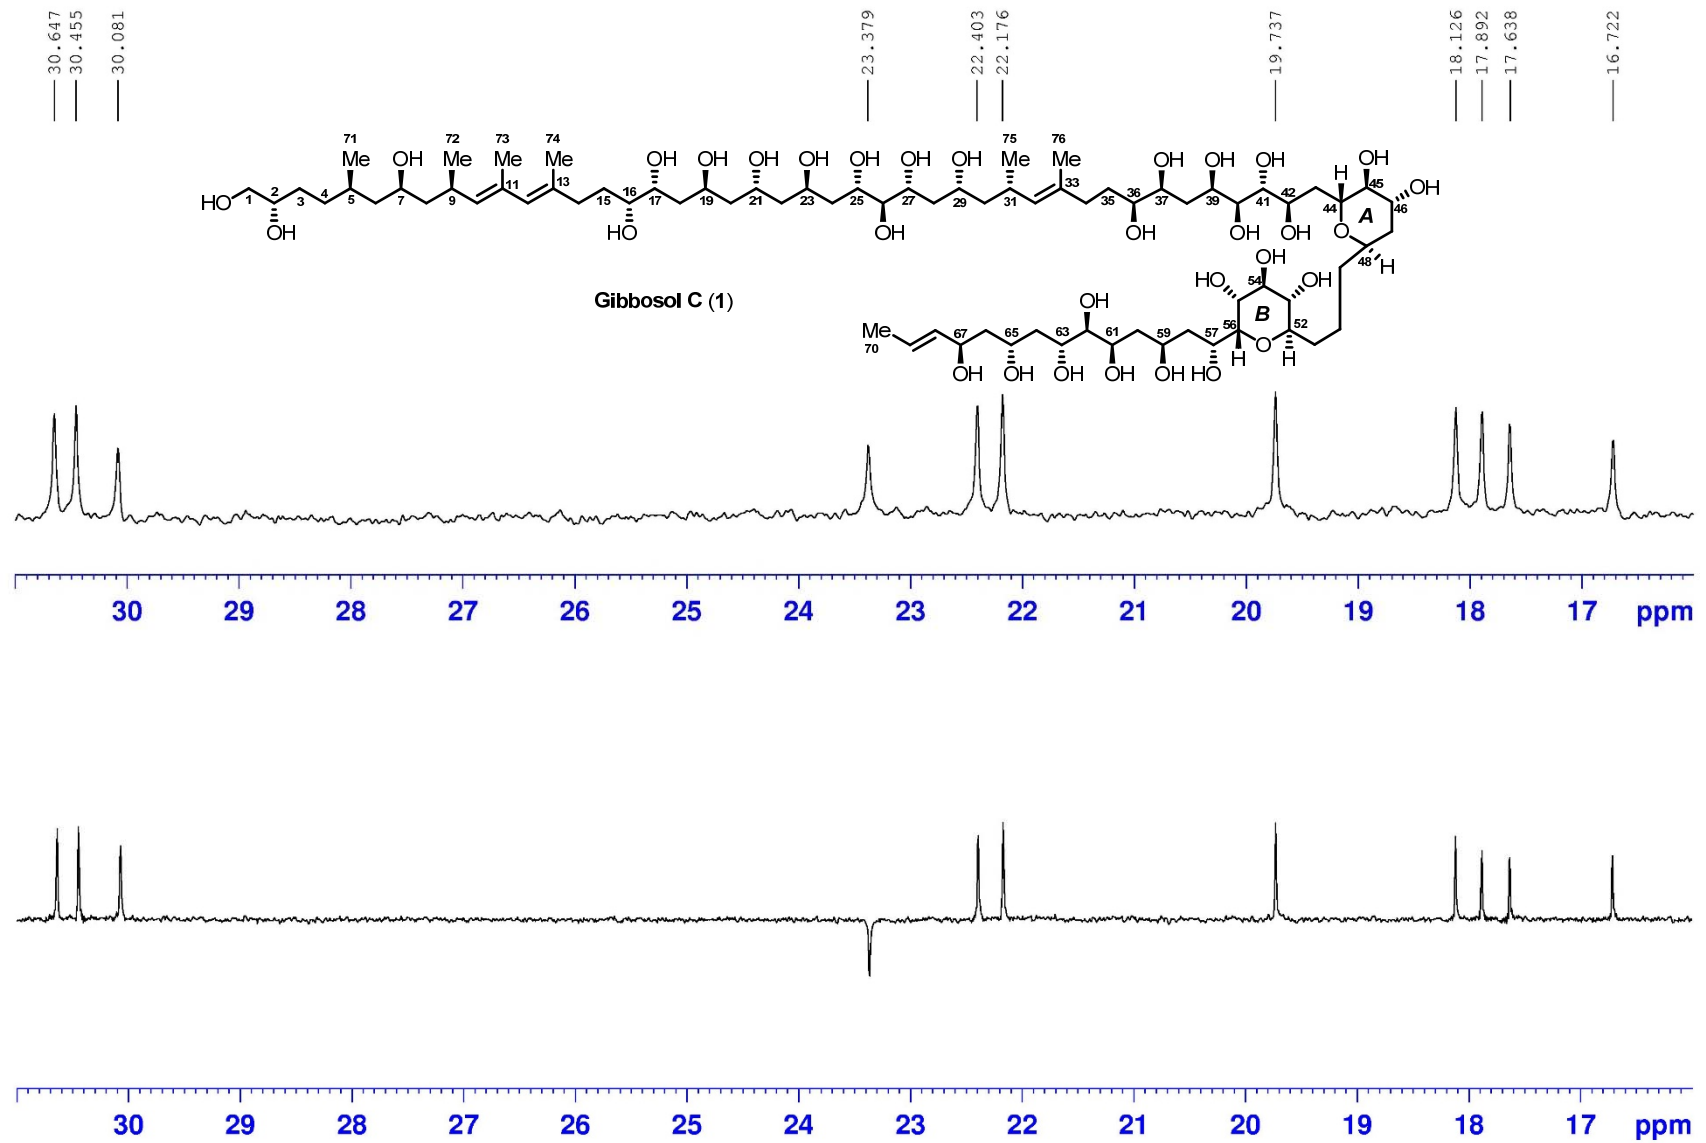



$^1\text{H}$ - $^1\text{H}$  COSY (700 MHz) spectrum of compound 1 in  $\text{CD}_3\text{OD}$

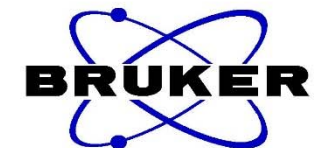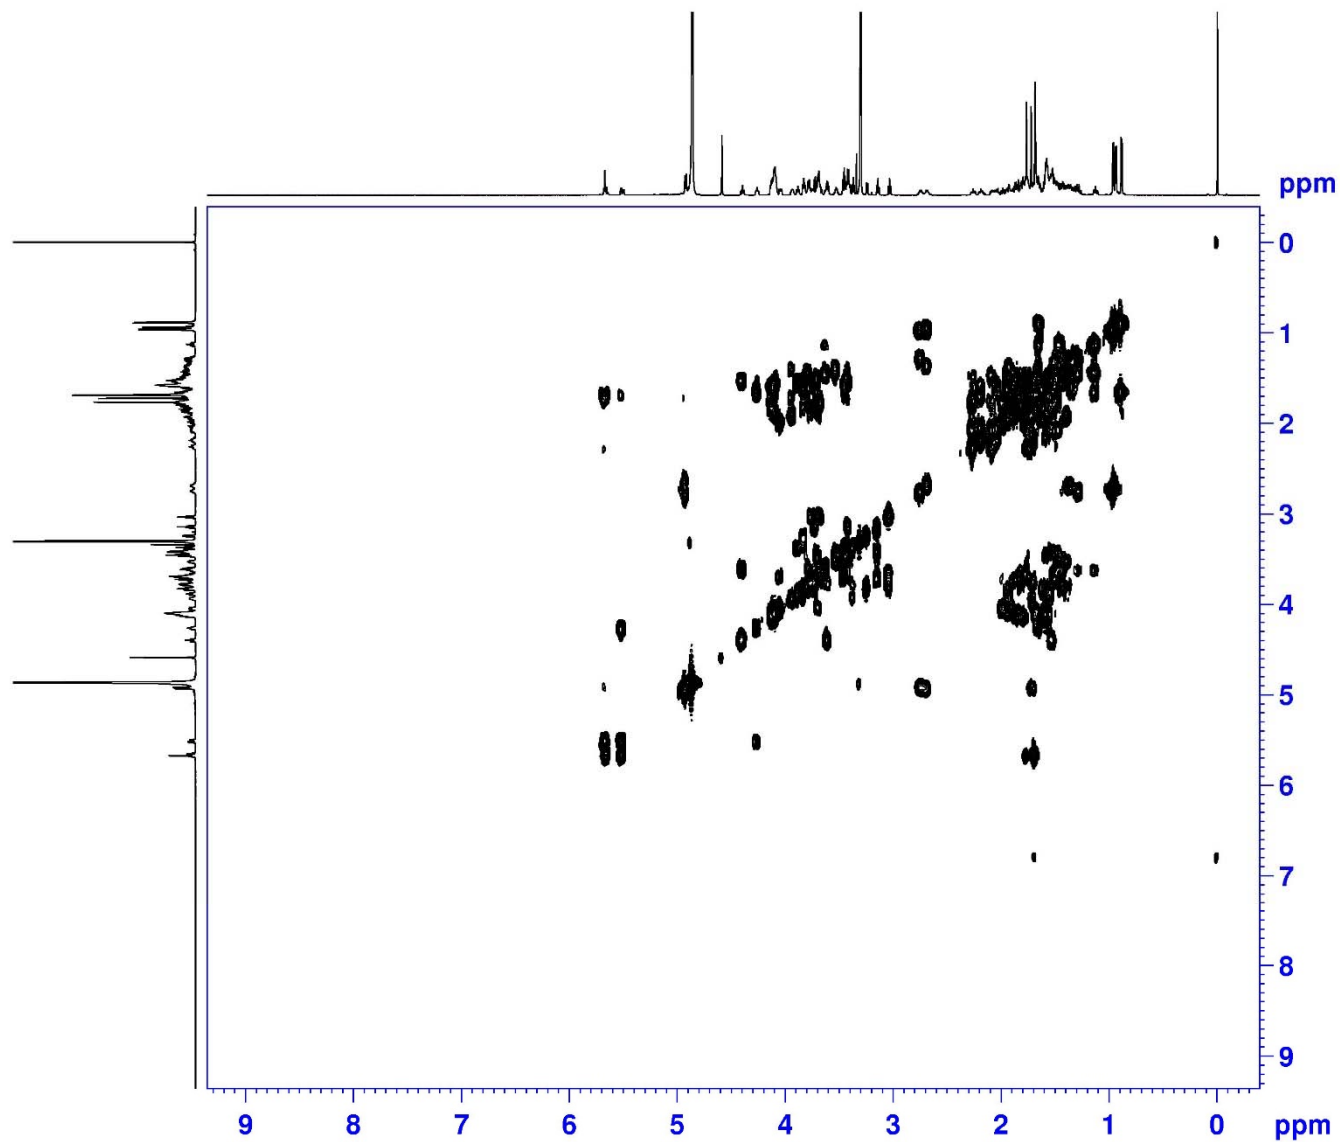

```
NAME      liwanshan-40-2-2
EXPNO     11
PROCNO    1
Date_     20190507
Time      17.46 h
INSTRUM   spect
PROBHD    Z120187_0028 (
PULPROG   cosygpmfzf
TD         2048
SOLVENT   MeOD
NS         24
DS         16
SWH        10653.409 Hz
FIDRES     10.403720 Hz
AQ         0.0961695 sec
RG         181.26
DW         46.933 usec
DE         10.00 usec
TE         298.0 K
D0         0.00000300 sec
D1         1.00000000 sec
D13        0.00000400 sec
D16        0.00020000 sec
IN0        0.00009380 sec
ND0        1
TD         128
SFO1       700.1848 MHz
FIDRES     83.288910 Hz
SW         15.226 ppm
FnMODE     QF
SI         1024
SF         700.1800160 MHz
WDW        SINE
SSB        0
LB         0.00 Hz
GB         0
PC         1.40
SI         1024
MC2        QF
SF         700.1800140 MHz
WDW        SINE
SSB        0
LB         0.00 Hz
GB         0
```

$^1\text{H}$ - $^1\text{H}$  COSY (700 MHz) spectrum of compound **1** in  $\text{CD}_3\text{OD}$

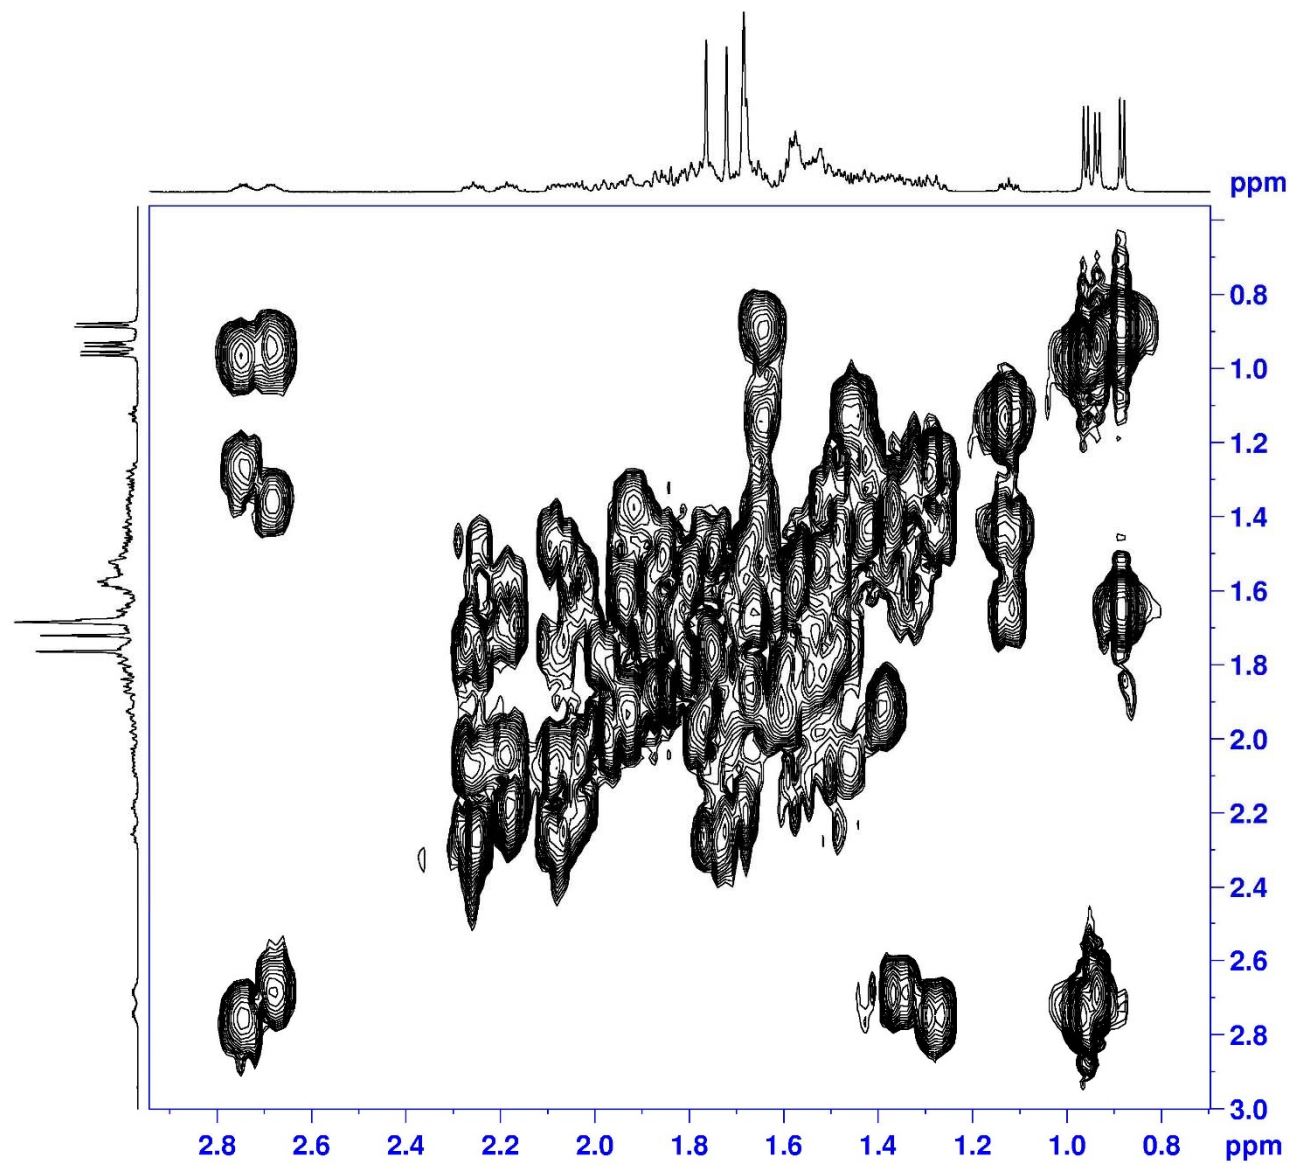

$^1\text{H}$ - $^1\text{H}$  COSY (700 MHz) spectrum of compound **1** in  $\text{CD}_3\text{OD}$

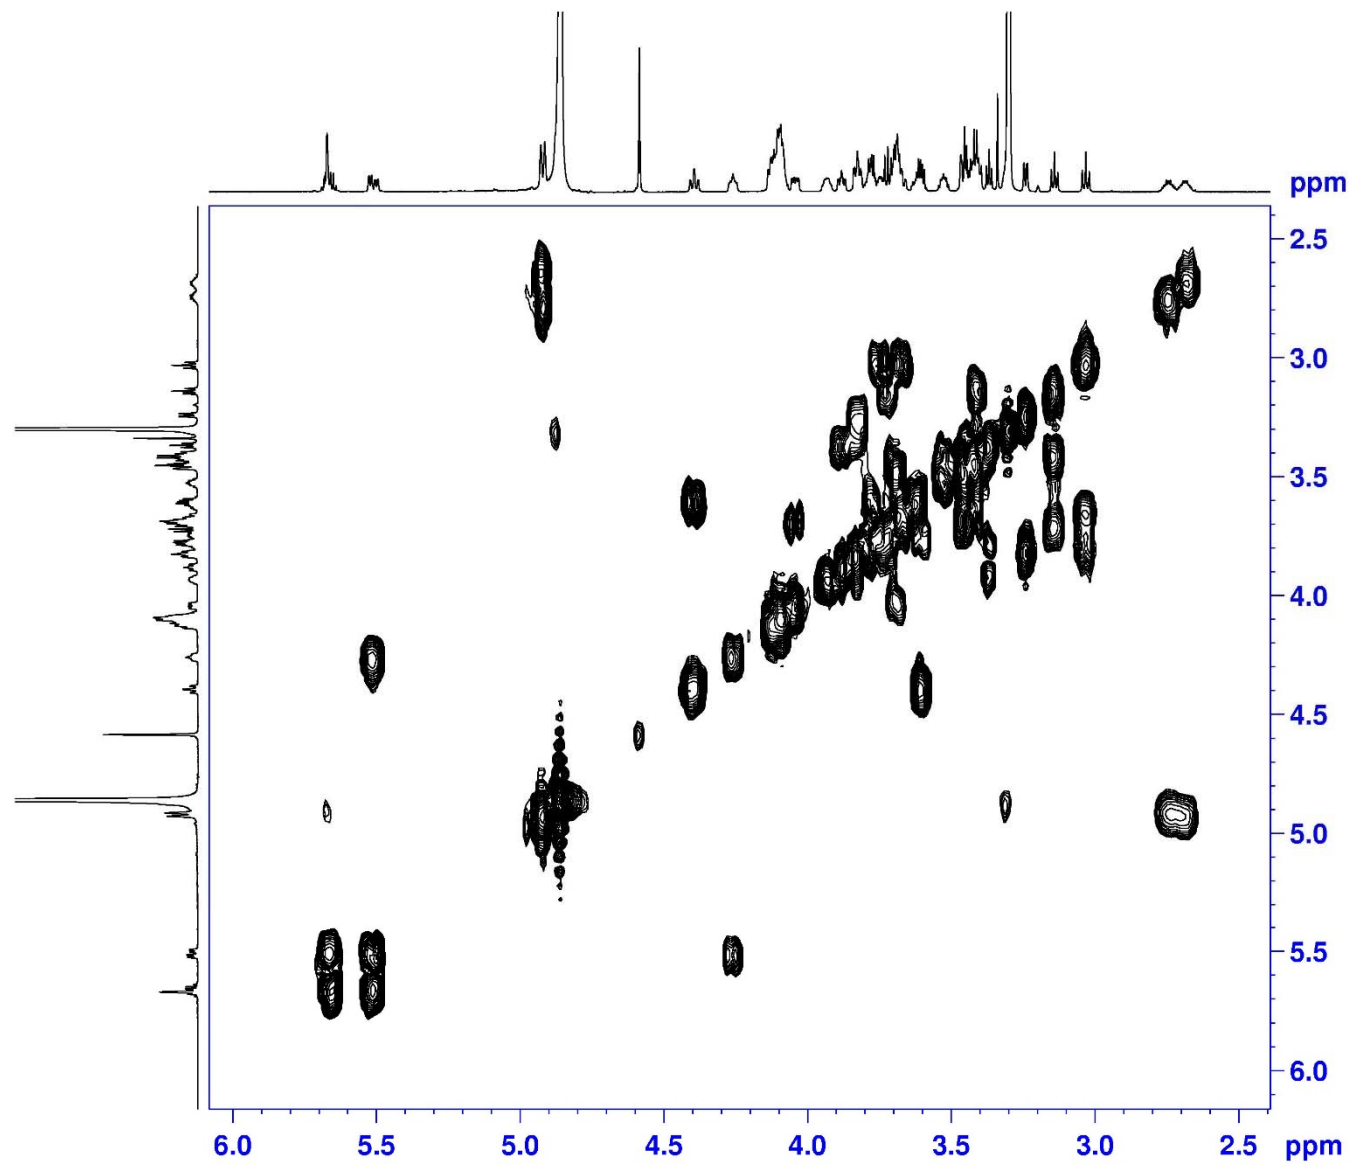

$^1\text{H}$ - $^1\text{H}$  COSY (700 MHz) spectrum of compound **1** in  $\text{CD}_3\text{OD}$

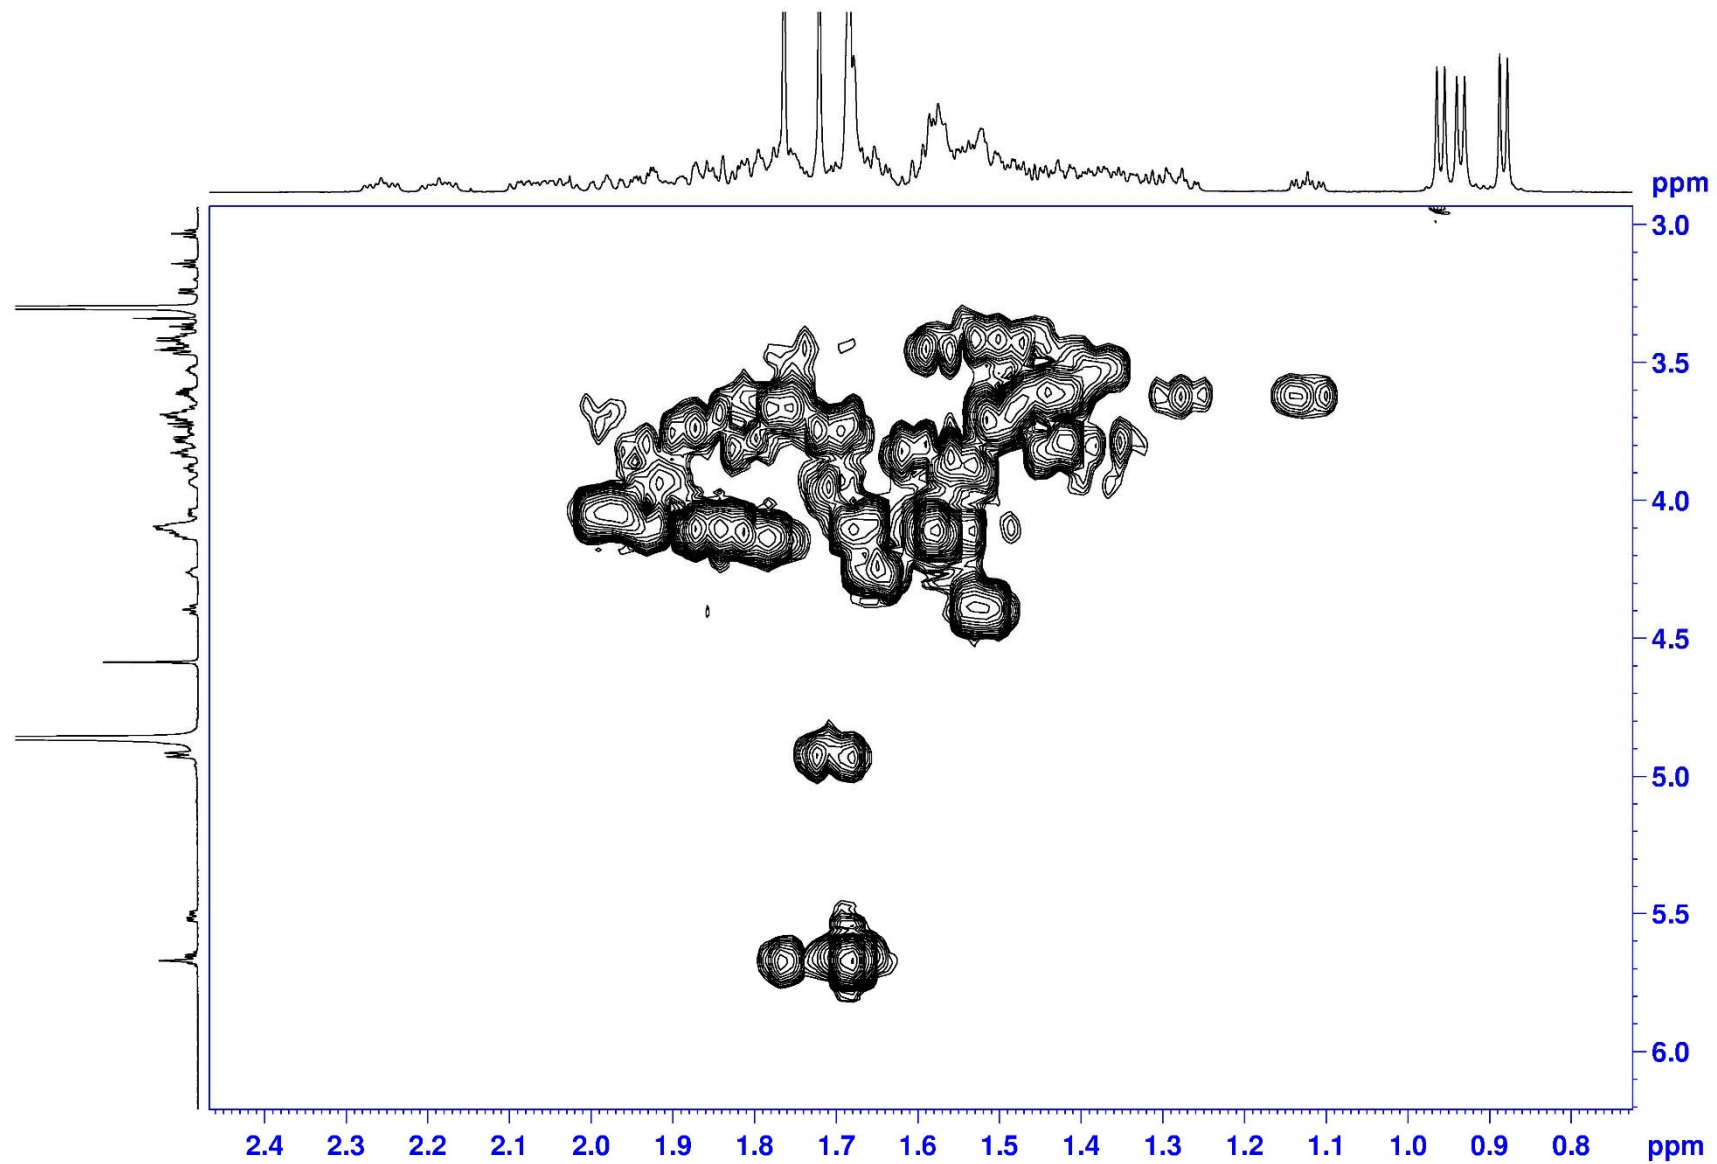

# HSQC (700 MHz) spectrum of compound 1 in CD<sub>3</sub>OD

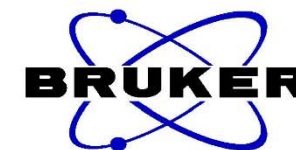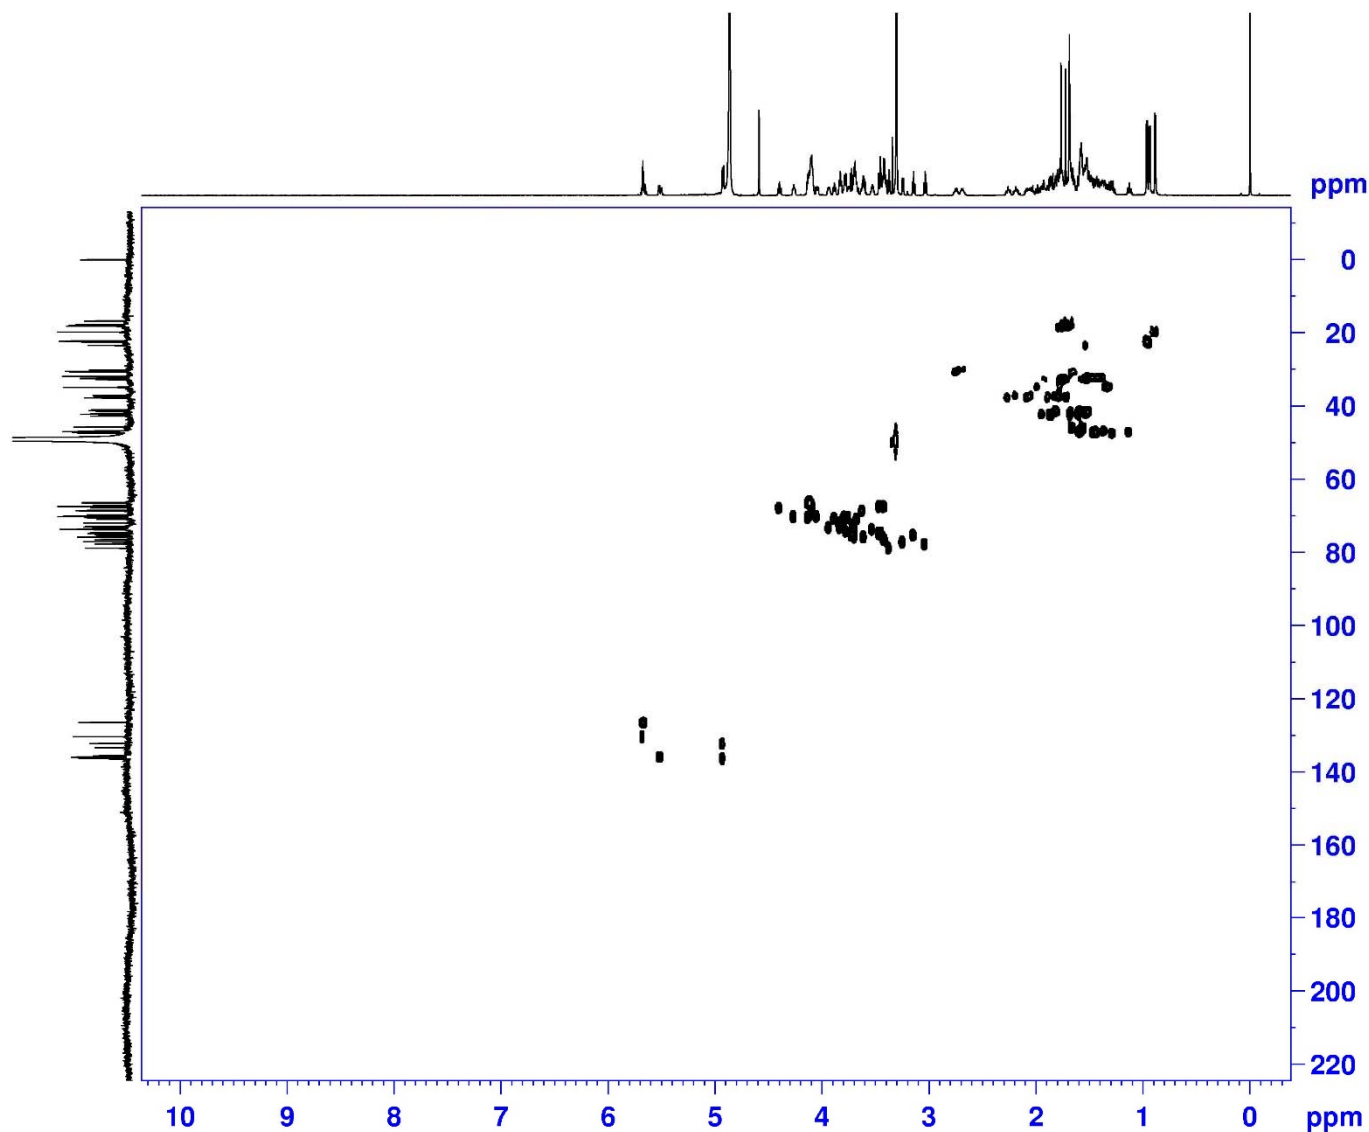

|         |                  |
|---------|------------------|
| NAME    | liwanshan-40-2-2 |
| EXPNO   | 16               |
| PROCNO  | 1                |
| Date_   | 20190508         |
| Time    | 3.38             |
| INSTRUM | spect            |
| PROBHD  | Z120187_0028 (   |
| PULPROG | hsqcetgp         |
| TD      | 2048             |
| SOLVENT | MeOD             |
| NS      | 32               |
| DS      | 16               |
| SWH     | 10504.202 F      |
| FIDRES  | 10.258010 F      |
| AQ      | 0.0975348 s      |
| RG      | 181.26           |
| DW      | 47.600 u         |
| DE      | 10.00 u          |
| TE      | 298.0 F          |
| CNST2   | 145.0000000      |
| D0      | 0.00000300 s     |
| D1      | 1.50000000 s     |
| D4      | 0.00172414 s     |
| D11     | 0.03000000 s     |
| D16     | 0.00020000 s     |
| IN0     | 0.00001230 s     |
| ND0     | 2                |
| TD      | 128              |
| SFO1    | 176.078 M        |
| FIDRES  | 317.581299 F     |
| SW      | 230.866 F        |
| FnMODE  | Echo-Antiecho    |
| SI      | 2048             |
| SF      | 700.1800170 M    |
| WDW     | QSINE            |
| SSB     | 2                |
| LB      | 0.00 F           |
| GB      | 0                |
| PC      | 1.40             |
| SI      | 2048             |
| MC2     | echo-antiecho    |
| SF      | 176.0601526 M    |
| WDW     | QSINE            |
| SSB     | 2                |
| LB      | 0.00 F           |
| GB      | 0                |

HSQC (700 MHz) spectrum of compound **1** in CD<sub>3</sub>OD

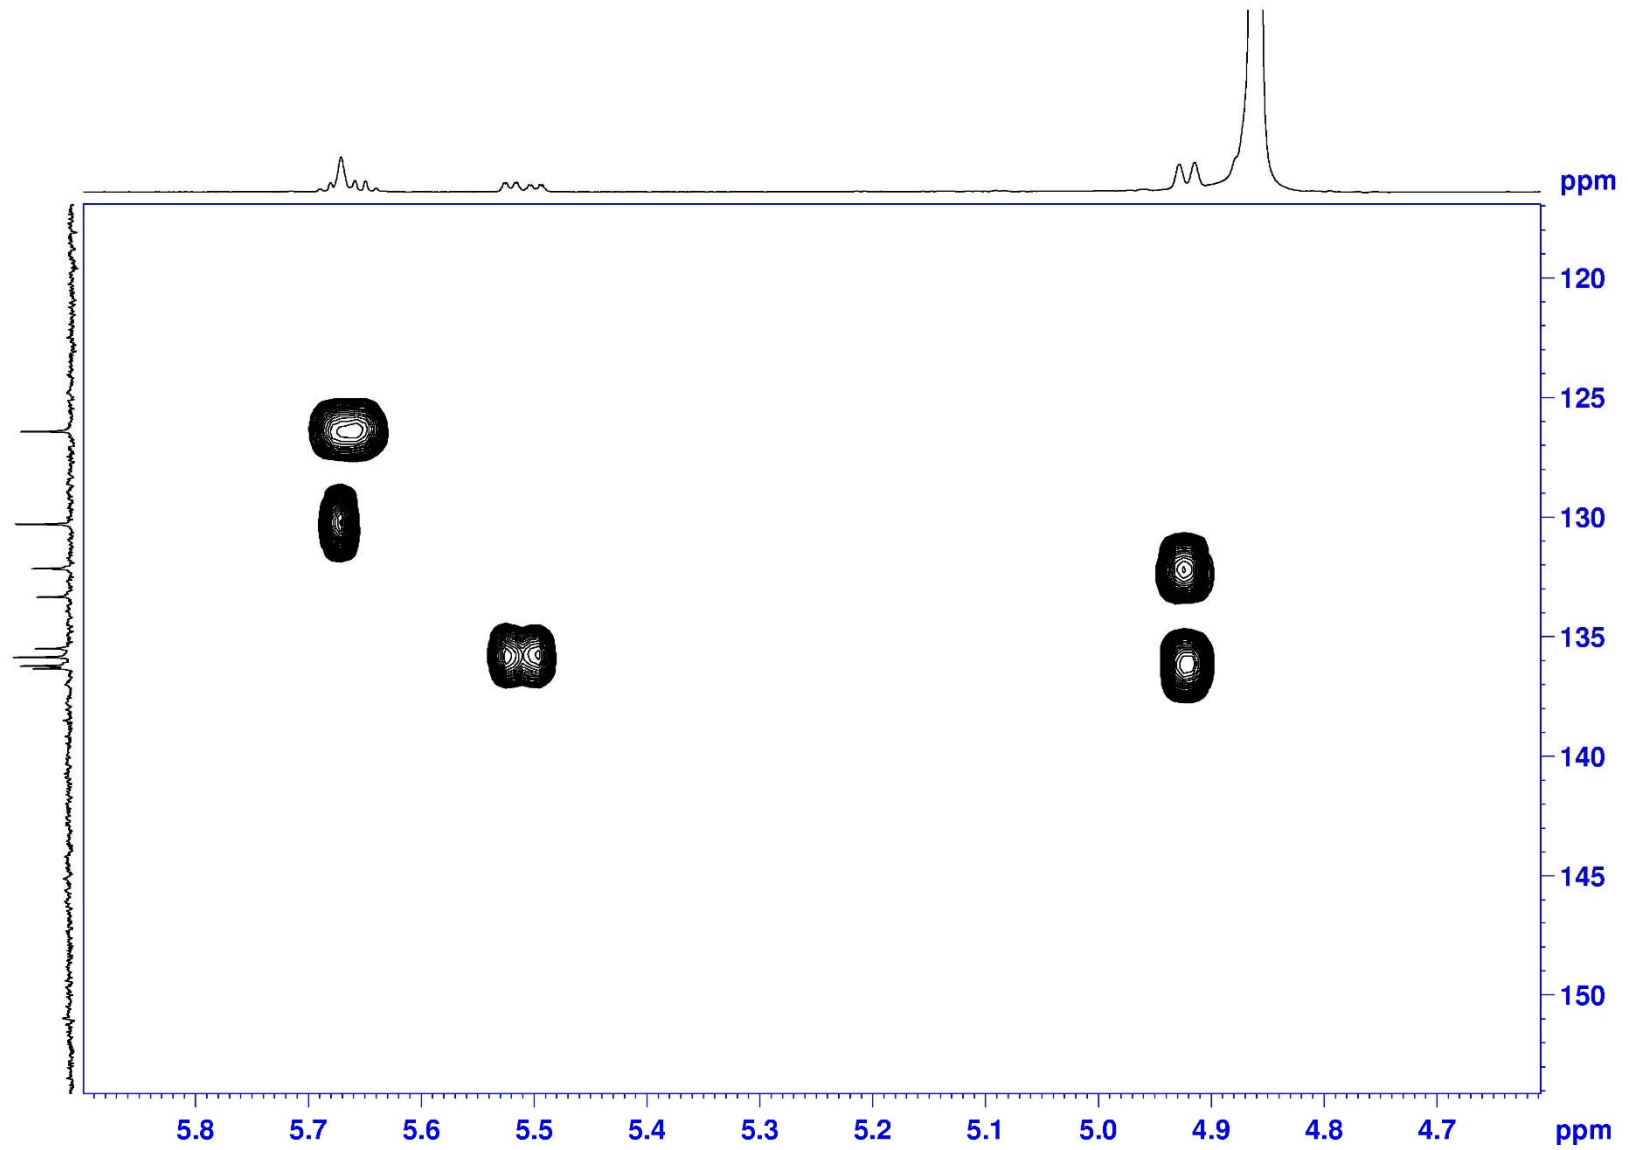

# HSQC (700 MHz) spectrum of compound 1 in CD<sub>3</sub>OD

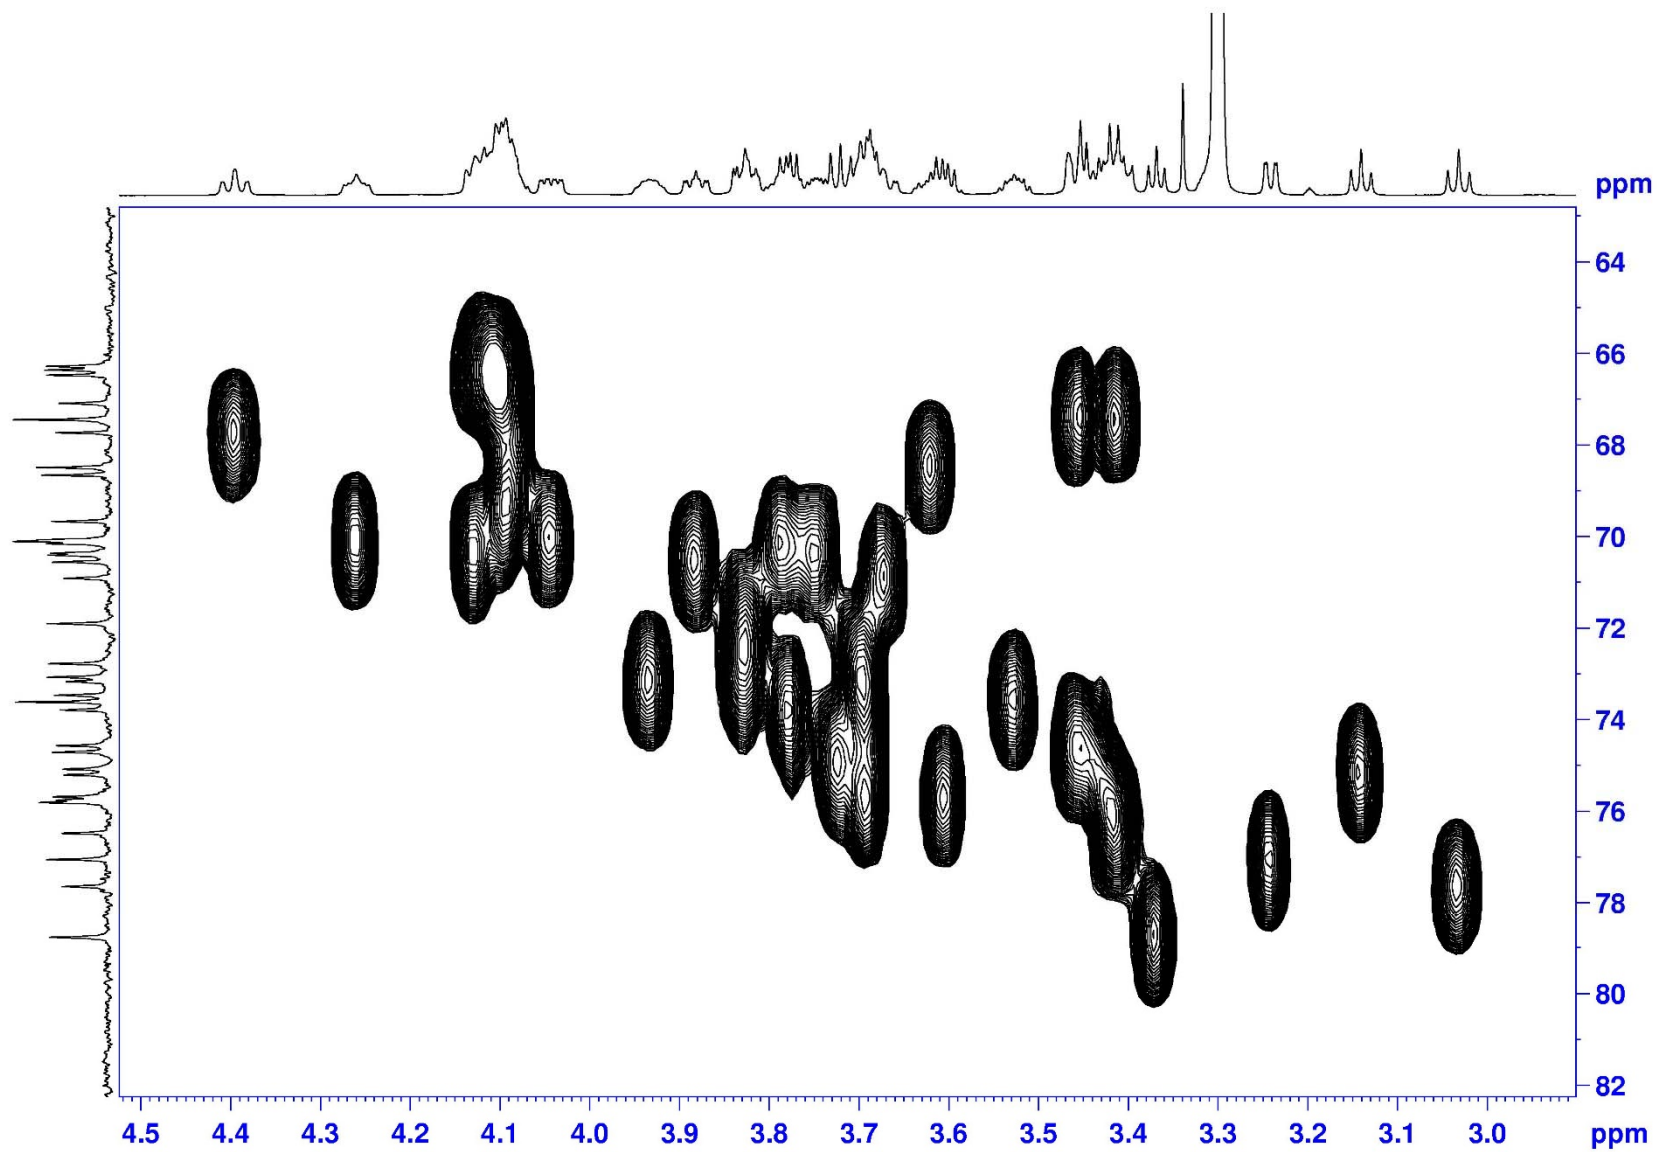

# HSQC (700 MHz) spectrum of compound **1** in CD<sub>3</sub>OD

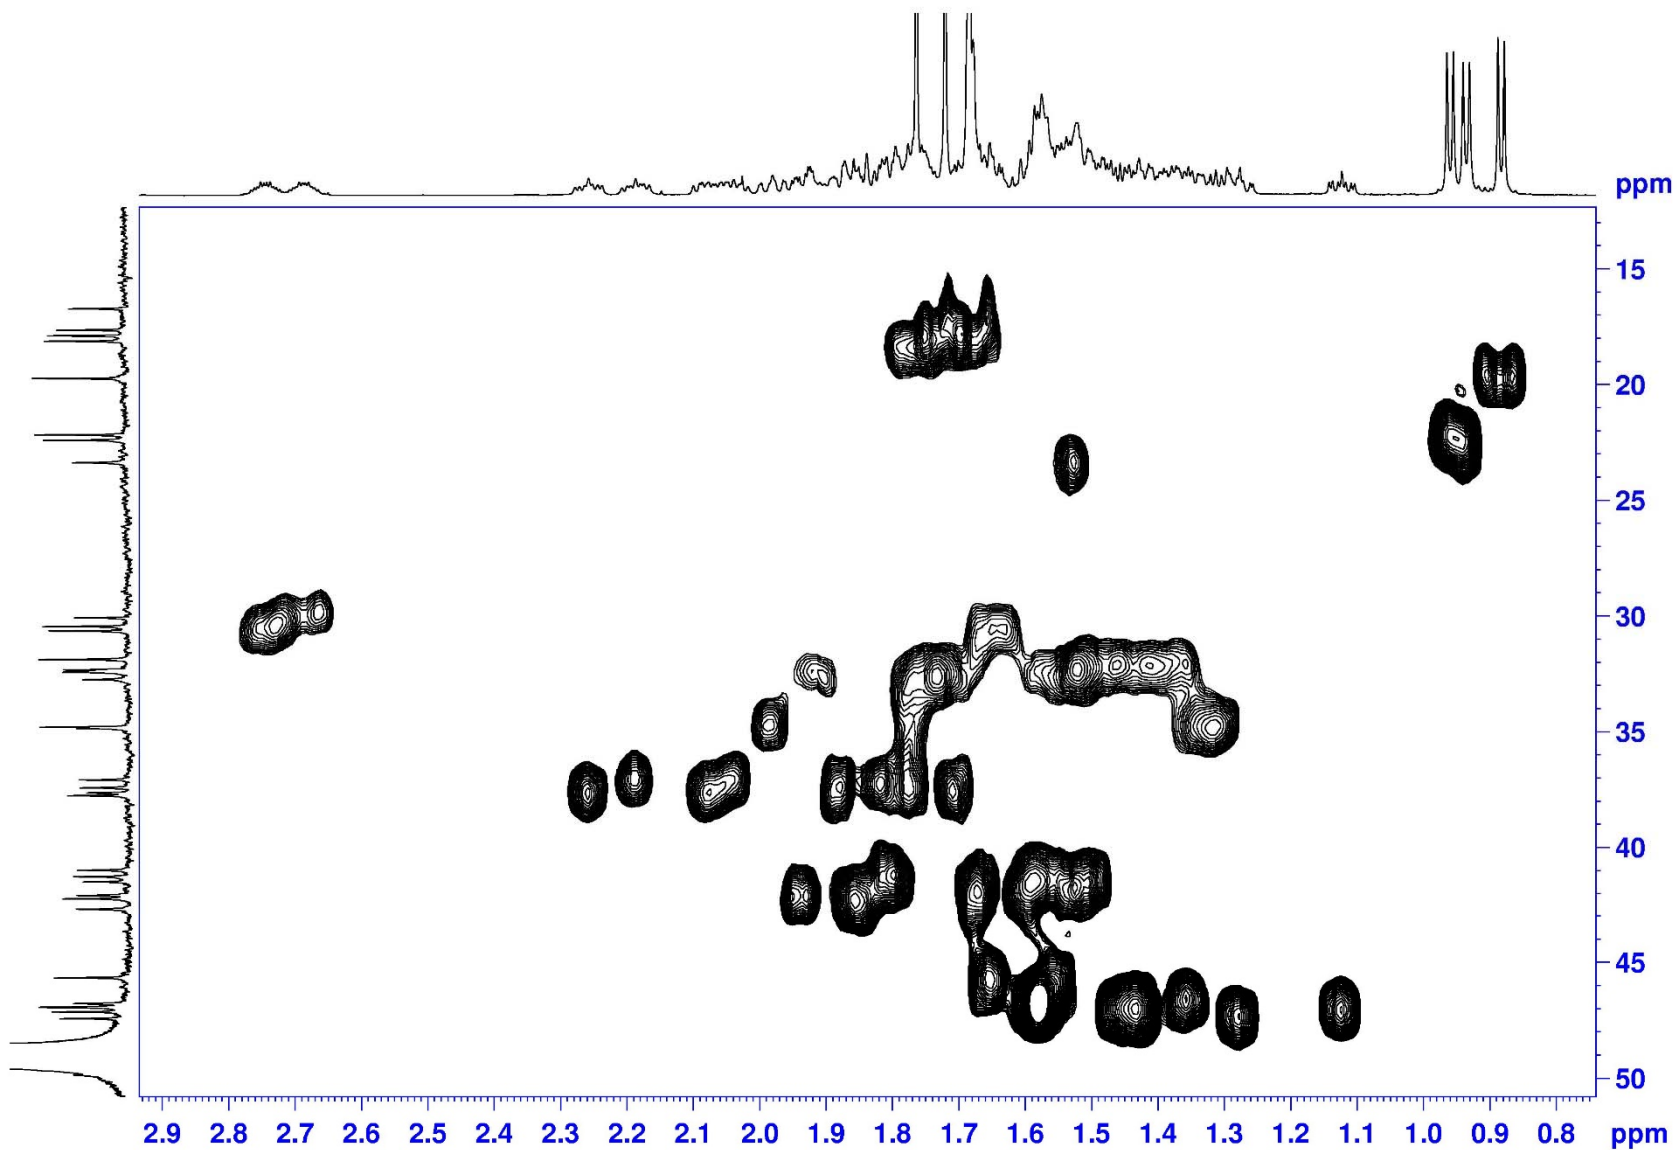



# Selective-HSQC (700 MHz) spectrum of compound 1 in CD<sub>3</sub>OD

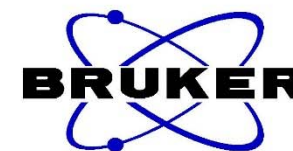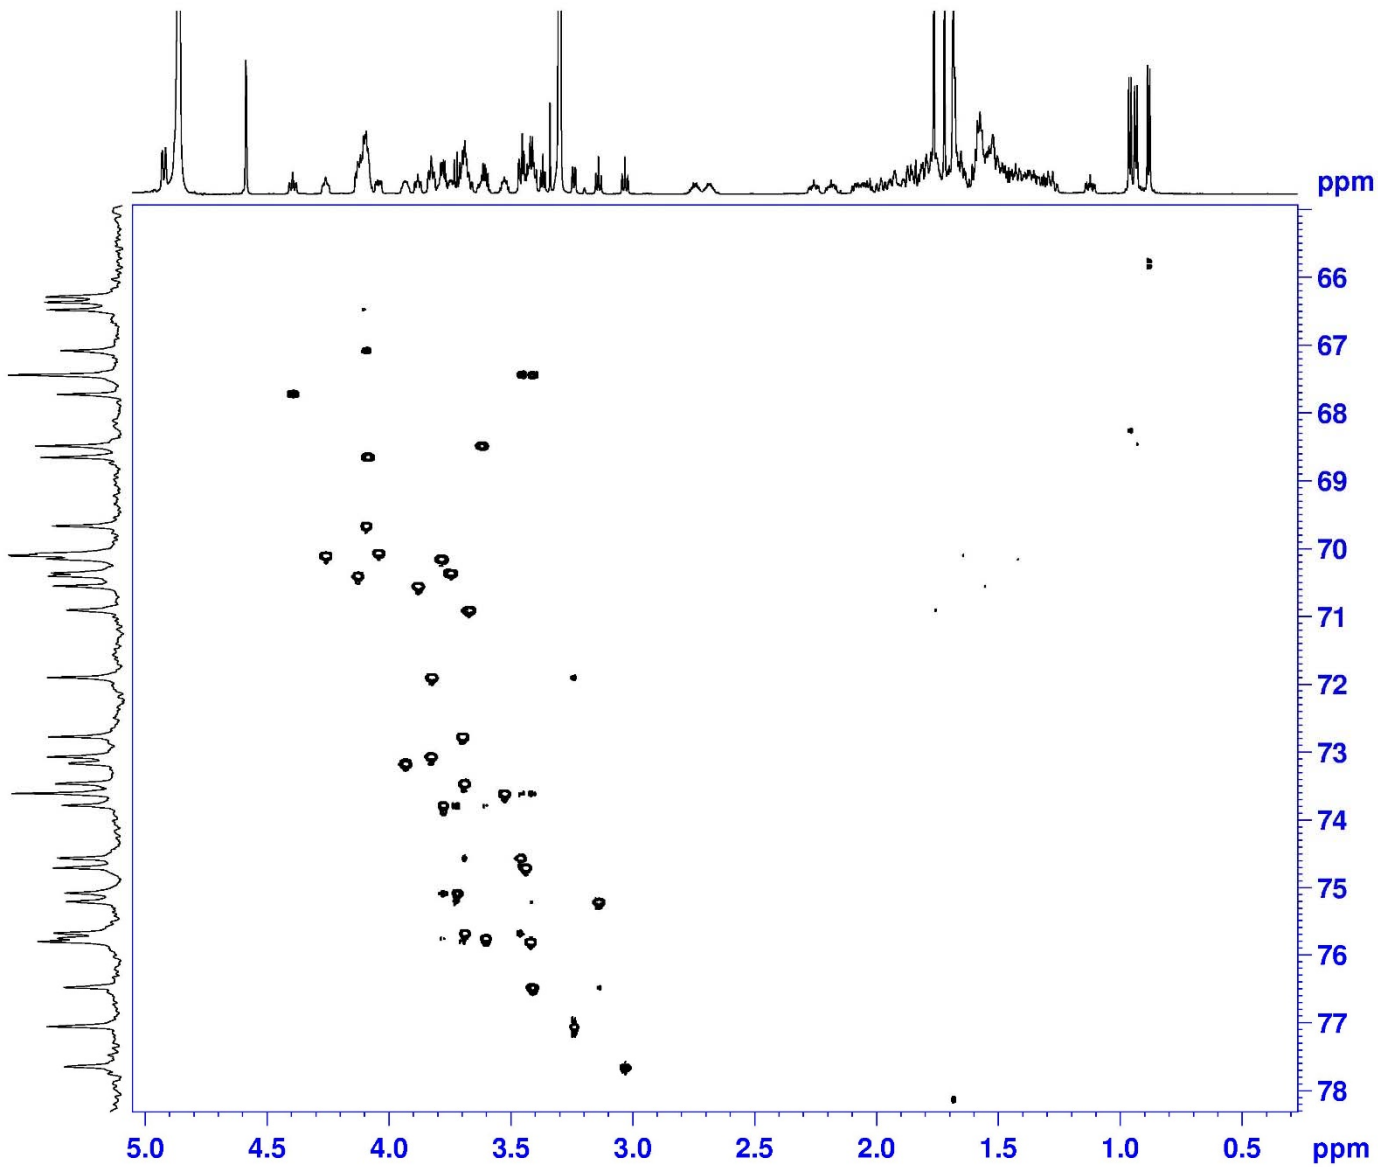

|         |                  |
|---------|------------------|
| NAME    | liwanshan-40-2-2 |
| EXPNO   | 17               |
| PROCNO  | 1                |
| Date_   | 20190510         |
| Time    | 15.49 h          |
| INSTRUM | spect            |
| PROBHD  | Z120187_0028 (   |
| PULPROG | shsqcetgpsisp2.2 |
| TD      | 2048             |
| SOLVENT | MeOD             |
| NS      | 32               |
| DS      | 16               |
| SWH     | 4340.278 Hz      |
| FIDRES  | 4.238553 Hz      |
| AQ      | 0.2359796 s      |
| RG      | 181.26           |
| DW      | 115.200 us       |
| DE      | 10.00 us         |
| TE      | 298.0 K          |
| CNST2   | 145.0000000      |
| CNST17  | -0.5000000       |
| D0      | 0.00000300 s     |
| D1      | 1.00000000 s     |
| D4      | 0.00172414 s     |
| D11     | 0.03000000 s     |
| D16     | 0.00020000 s     |
| D24     | 0.00089000 s     |
| IN0     | 0.00018500 s     |
| ND0     | 2                |
| TD      | 256              |
| SFO1    | 176.0729 MHz     |
| FIDRES  | 10.557432 Hz     |
| SW      | 15.350 MHz       |
| FnMODE  | Echo-Antiecho    |
| SI      | 1024             |
| SF      | 700.1800207 MHz  |
| WDW     | QSINE            |
| SSB     | 2                |
| LB      | 0.00 Hz          |
| GB      | 0                |
| PC      | 1.40             |
| SI      | 1024             |
| MC2     | echo-antiecho    |
| SF      | 176.0601526 MHz  |
| WDW     | QSINE            |
| SSB     | 2                |
| LB      | 0.00 Hz          |
| --      | ^                |

Selective-HSQC (700 MHz) spectrum of compound **1** in CD<sub>3</sub>OD

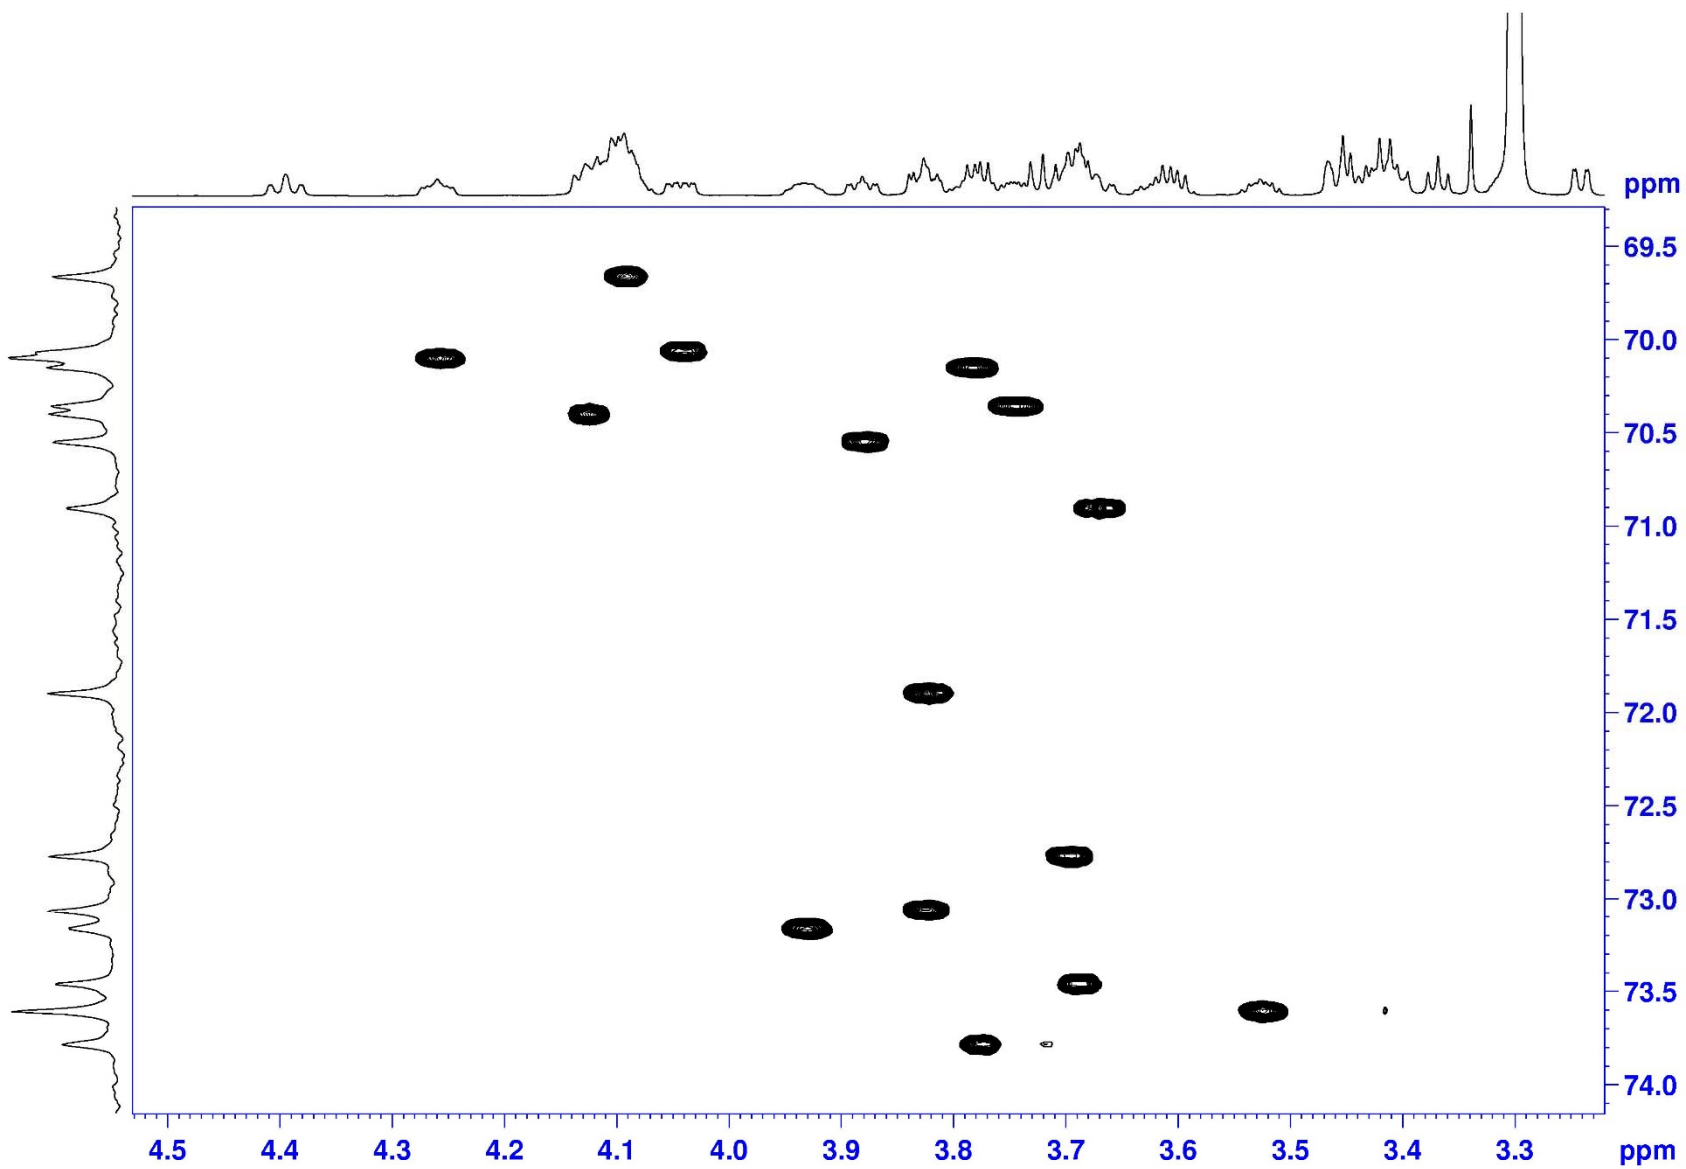

Selective-HSQC (700 MHz) spectrum of compound **1** in CD<sub>3</sub>OD

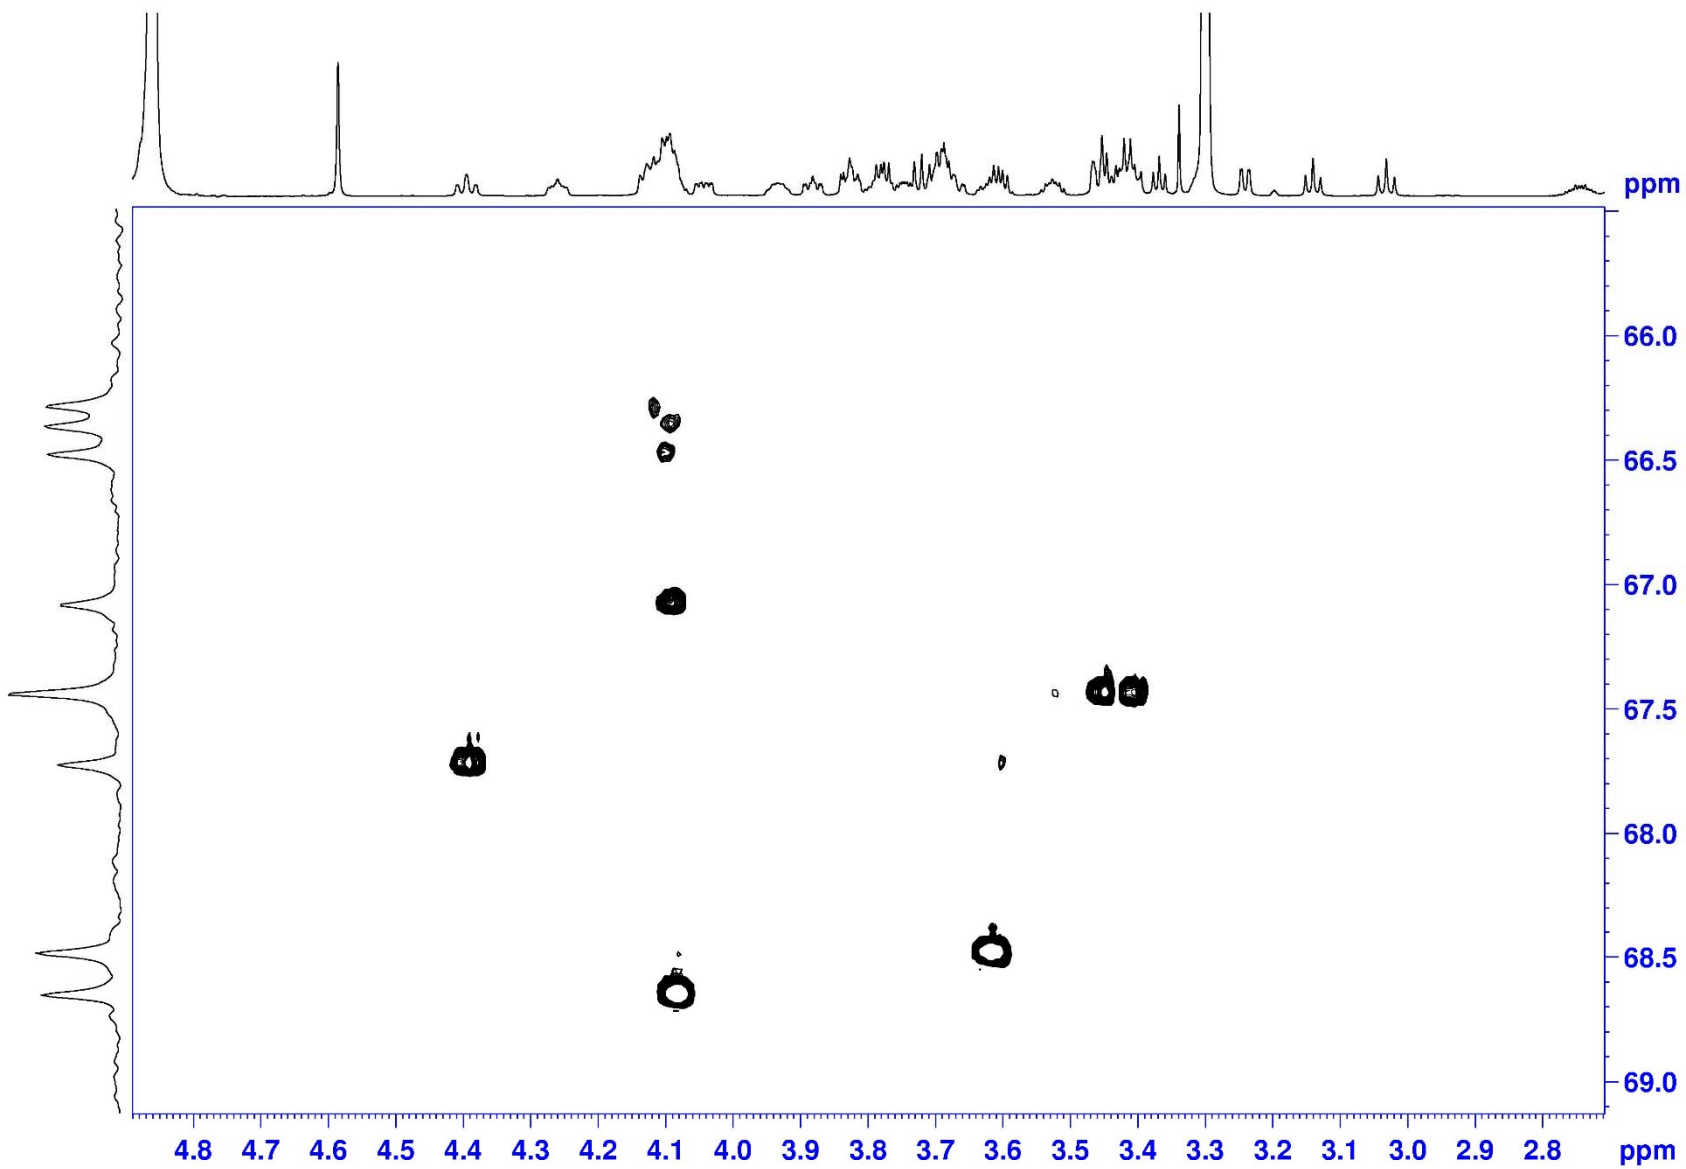

# Selective-HSQC (700 MHz) spectrum of compound 1 in CD<sub>3</sub>OD

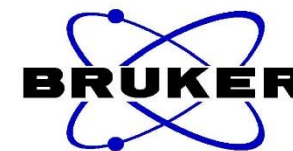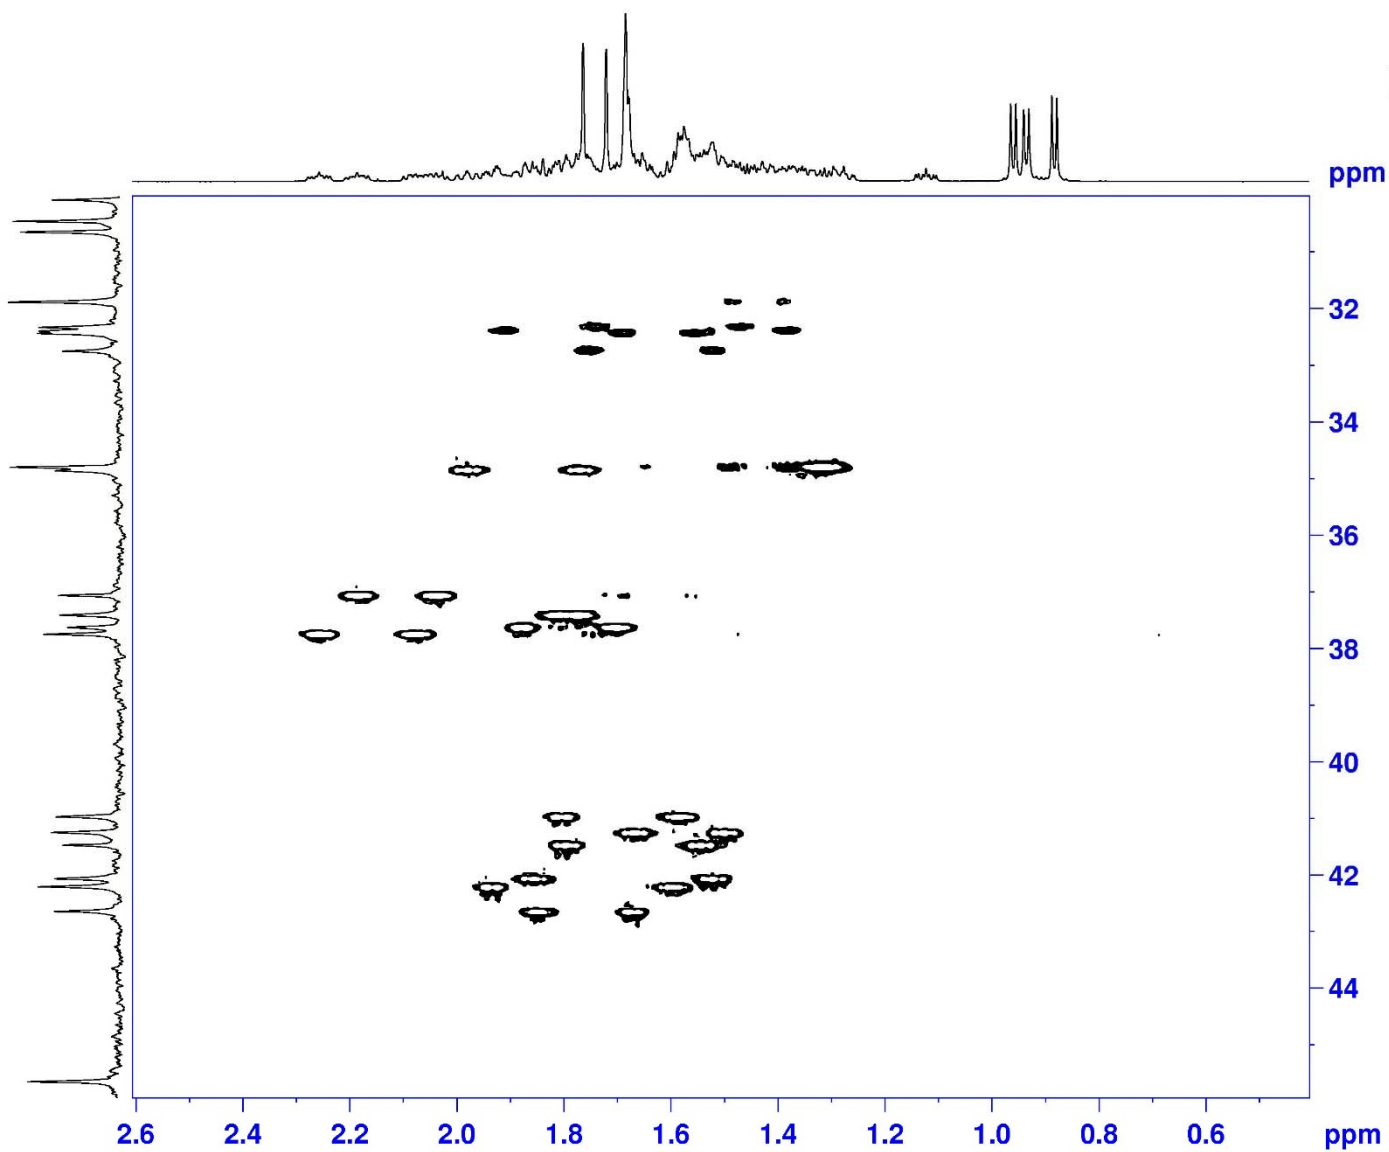

```

NAME      liwanshan-40-2-2
EXPNO     18
PROCNO    1
Date_     20190510
Time      18.45 h
INSTRUM   spect
PROBHD    Z120187_0028 (
PULPROG   shsqcetgpsisp2.2
TD        2048
SOLVENT   MeOD
NS        32
DS        16
SWH       4340.278 H
FIDRES    4.238553 H
AQ        0.2359796 s
RG        181.26
DW        115.200 u
DE        10.00 u
TE        298.0 K
CNST2     145.0000000
CNST17    -0.5000000
D0        0.00000300 s
D1        1.00000000 s
D4        0.00172414 s
D11       0.03000000 s
D16       0.00020000 s
D24       0.00089000 s
IN0       0.00014230 s
ND0       2
TD        256
SFO1      176.0669 M
FIDRES    13.725404 H
SW        19.957 p
F1MODE    Echo-Antiecho
SI        1024
SF        700.1800207 M
WDW       QSINE
SSB       2
LB        0.00 H
GB        0
PC        1.40
SI        1024
MC2       echo-antiecho
SF        176.0601526 M
WDW       QSINE
SSB       2
LB        0.00 H
GB        0
    
```

Selective-HSQC (700 MHz) spectrum of compound **1** in CD<sub>3</sub>OD

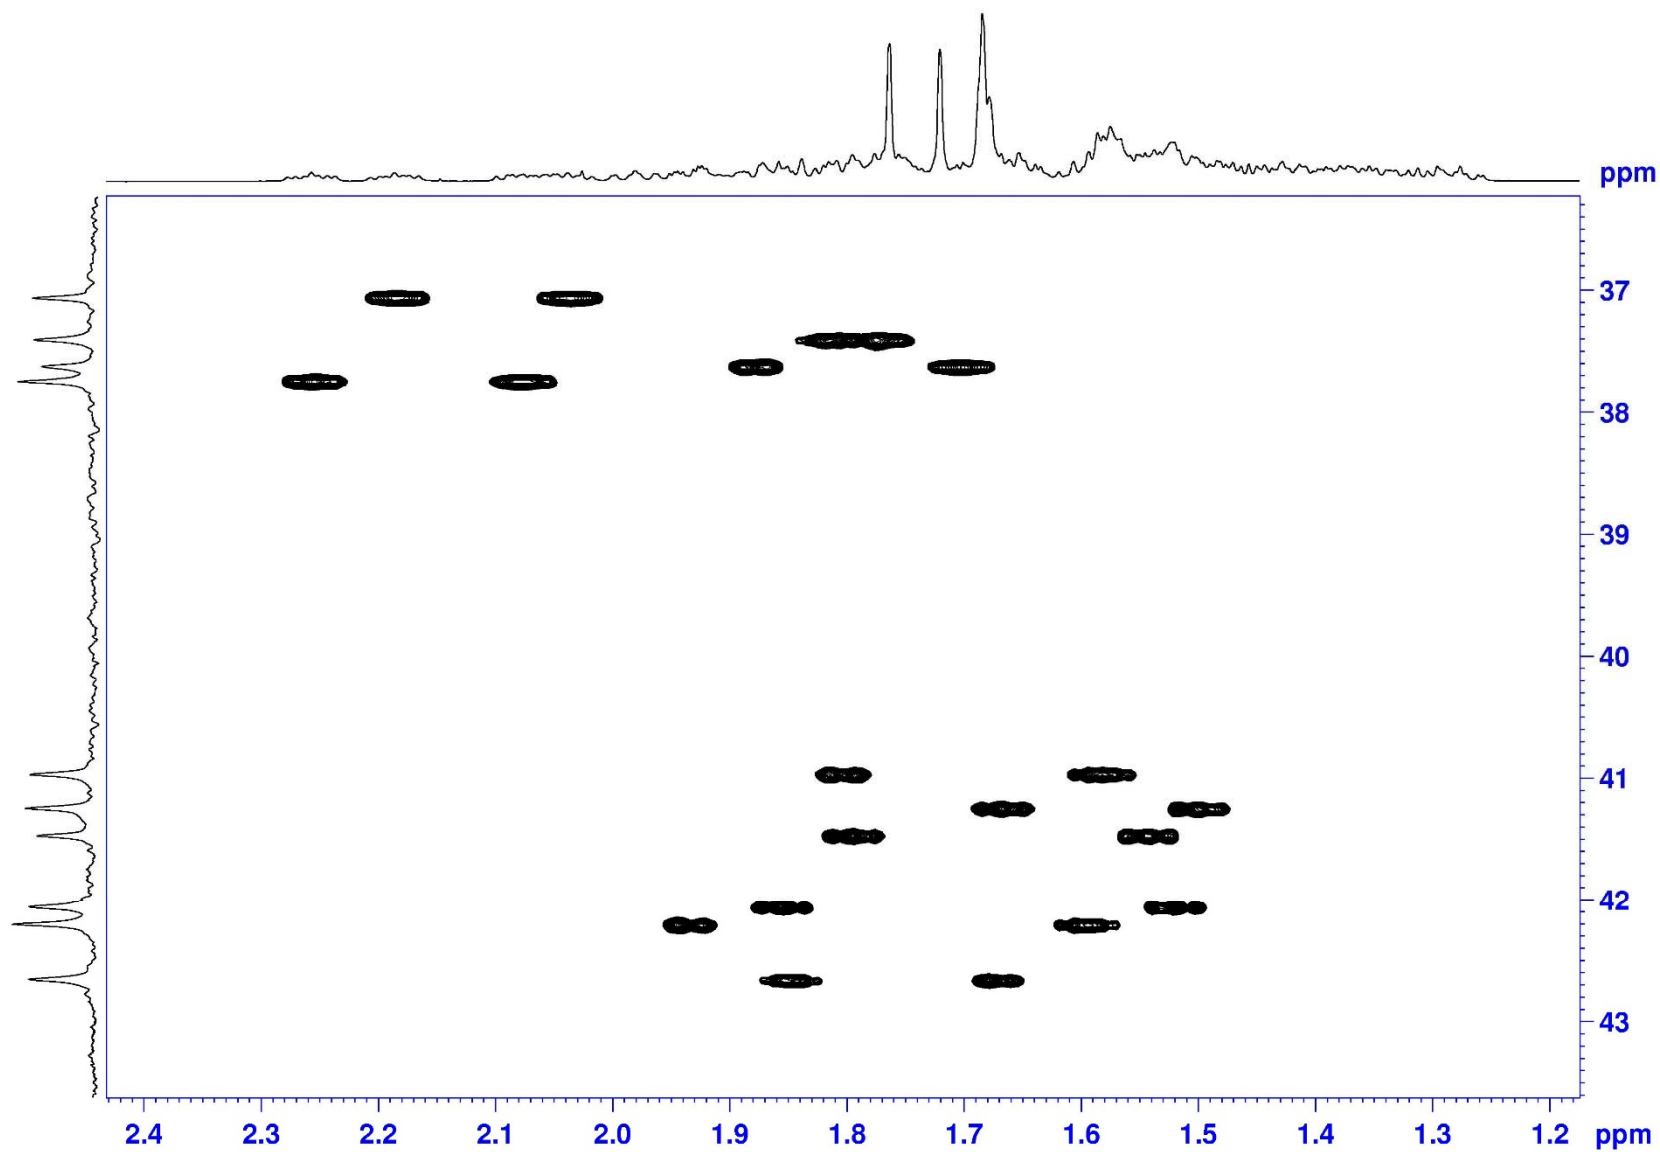

Selective-HSQC (700 MHz) spectrum of compound **1** in CD<sub>3</sub>OD

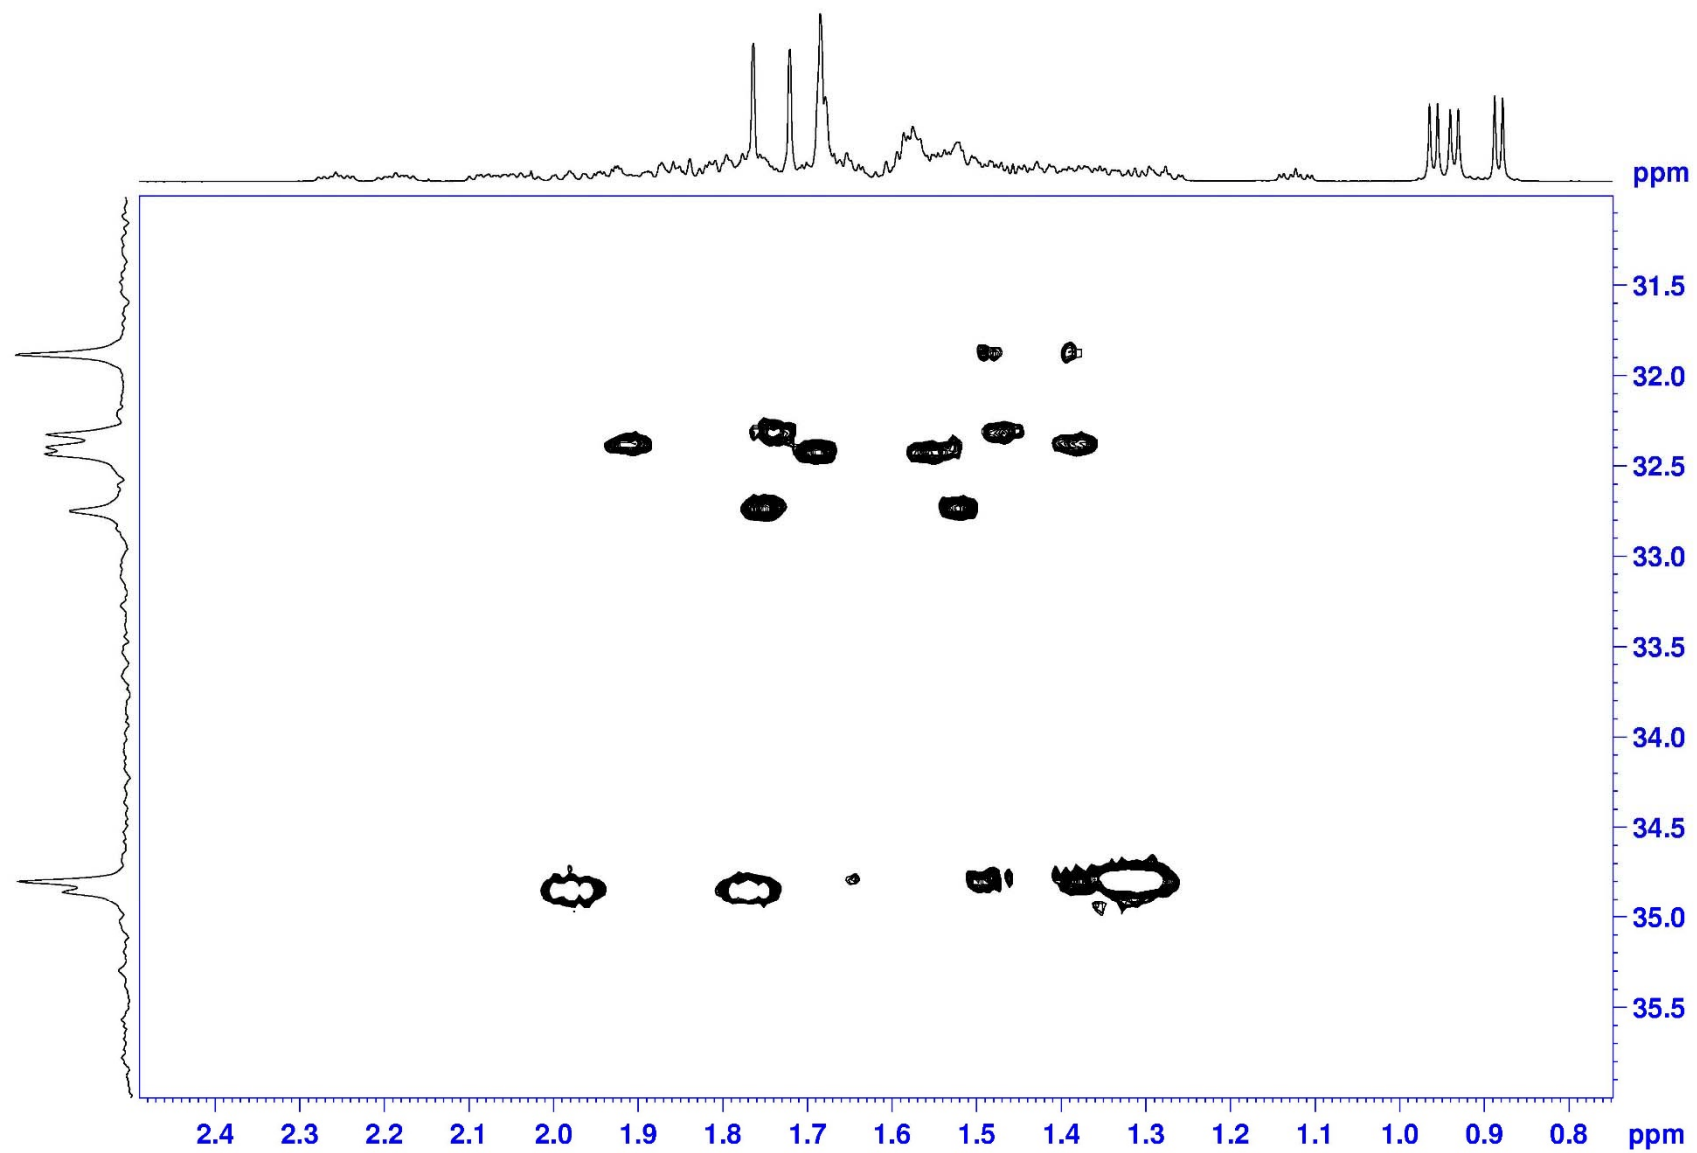

# Selective-HSQC (700 MHz) spectrum of compound 1 in CD<sub>3</sub>OD

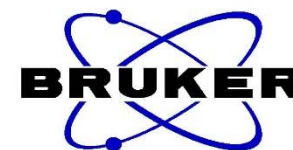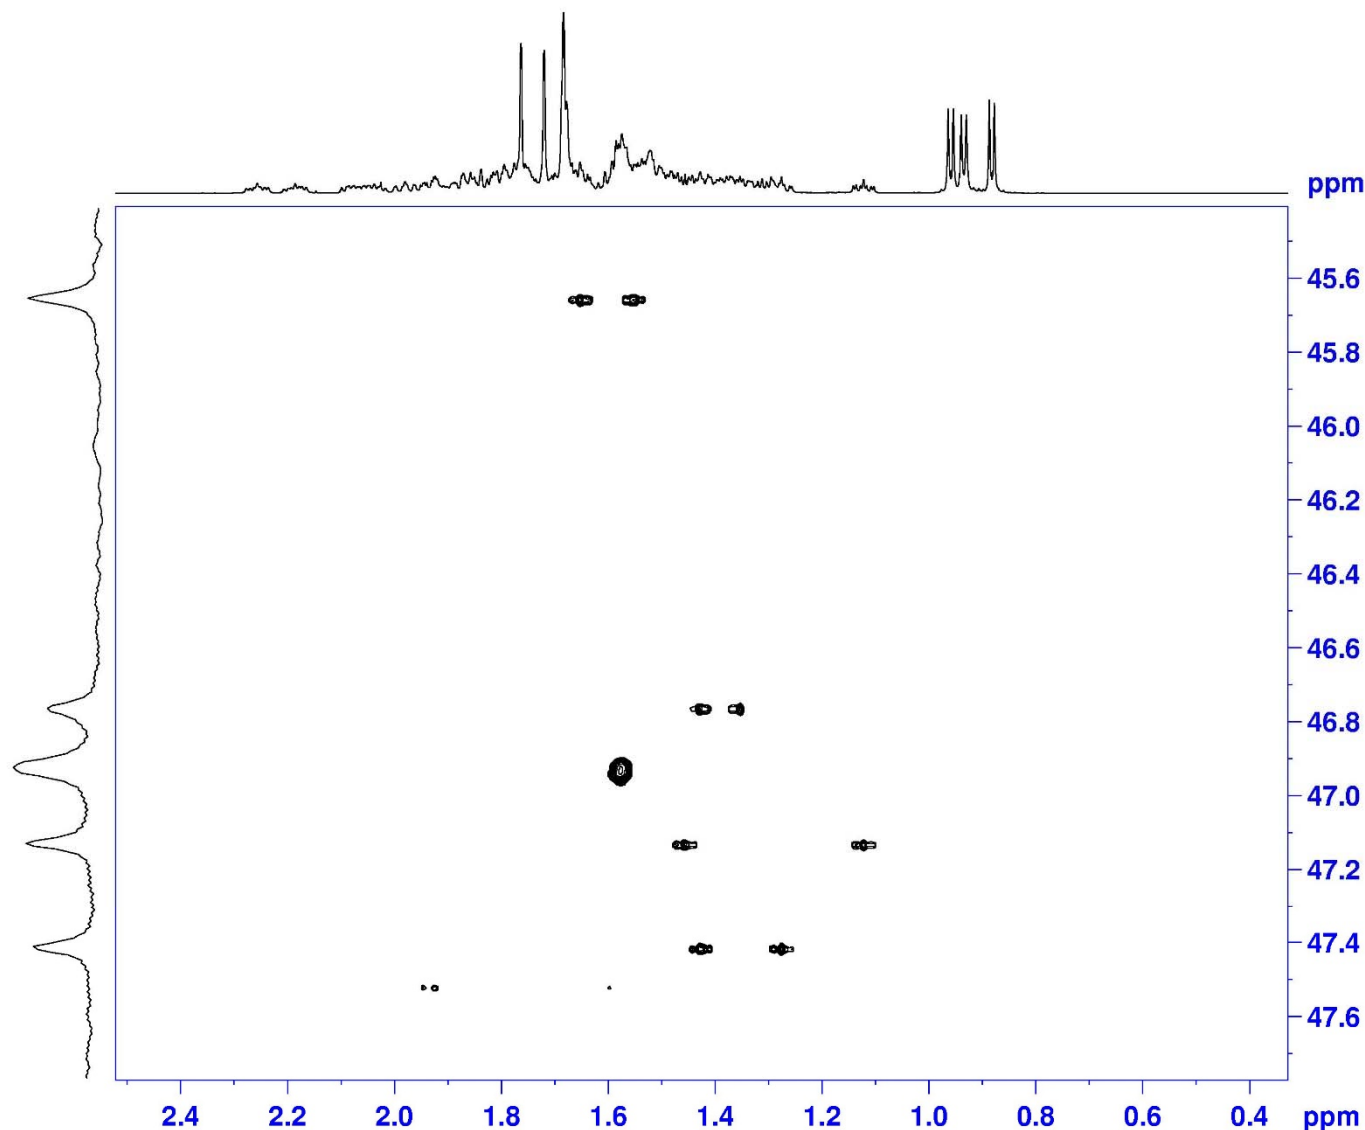

ppm

|         |                  |
|---------|------------------|
| NAME    | liwanshan-40-2-2 |
| EXPNO   | 19               |
| PROCNO  | 1                |
| Date_   | 20190518         |
| Time    | 19.20 h          |
| INSTRUM | spect            |
| PROBHD  | Z120187_0028 {   |
| PULPROG | shsqcetgpsisp2.2 |
| TD      | 2048             |
| SOLVENT | MeOD             |
| NS      | 64               |
| DS      | 16               |
| SWH     | 5013.369 H       |
| FIDRES  | 4.895868 H       |
| AQ      | 0.2043039 s      |
| RG      | 181.26           |
| DW      | 99.733 u         |
| DE      | 10.00 u          |
| TE      | 298.0 K          |
| CNST2   | 145.0000000      |
| CNST17  | -0.5000000       |
| D0      | 0.00000300 s     |
| D1      | 1.00000000 s     |
| D4      | 0.00172414 s     |
| D11     | 0.03000000 s     |
| D16     | 0.00020000 s     |
| D24     | 0.00089000 s     |
| IN0     | 0.00106830 s     |
| ND0     | 2                |
| TD      | 128              |
| SFO1    | 176.0683 M       |
| FIDRES  | 3.656510 H       |
| SW      | 2.658 p          |
| FnMODE  | Echo-Antiecho    |
| SI      | 1024             |
| SF      | 700.1800207 M    |
| WDW     | QSINE            |
| SSB     | 2                |
| LB      | 0.00 H           |
| GB      | 0                |
| PC      | 1.40             |
| SI      | 1024             |
| MC2     | echo-antiecho    |
| SF      | 176.0601526 M    |
| WDW     | QSINE            |
| SSB     | 2                |
| LB      | 0.00 H           |
| GB      | 0                |

ppm

# HMBC (700 MHz) spectrum of compound **1** in CD<sub>3</sub>OD

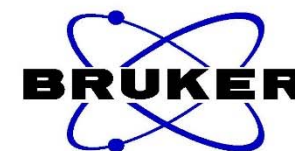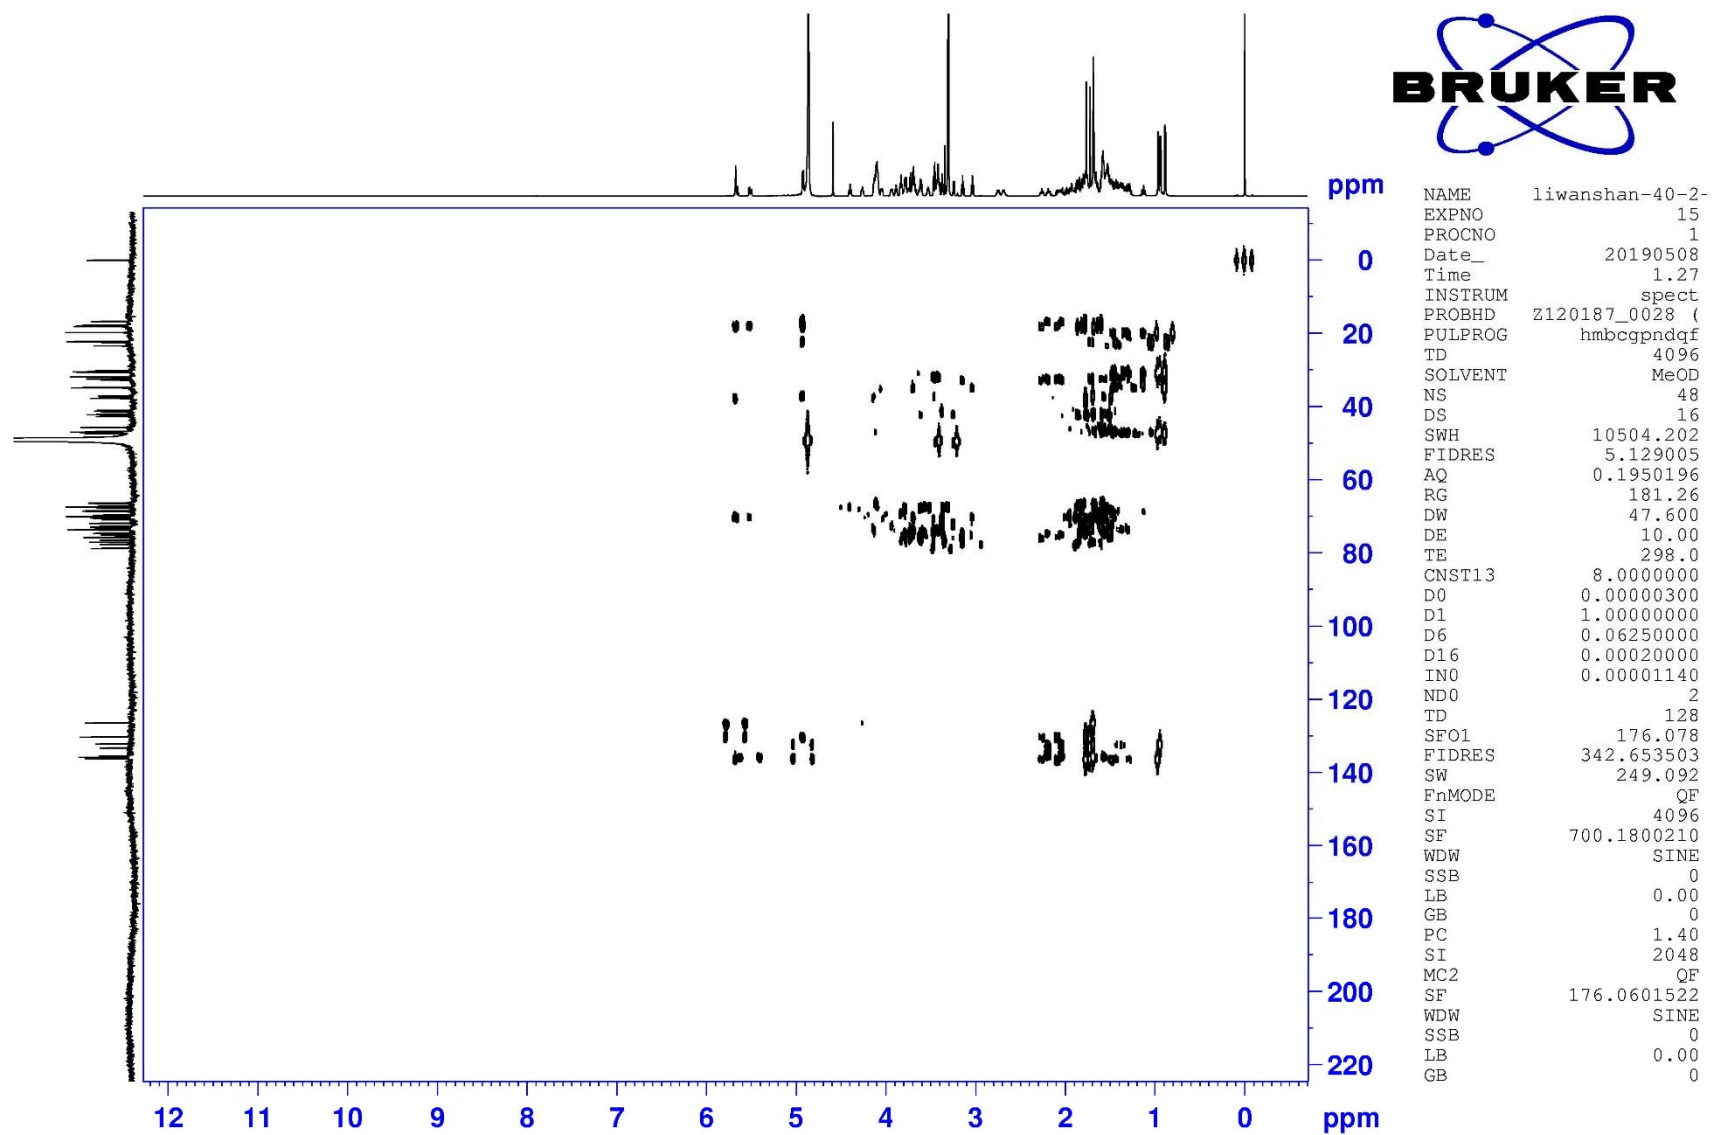



HMBC (700 MHz) spectrum of compound **1** in CD<sub>3</sub>OD

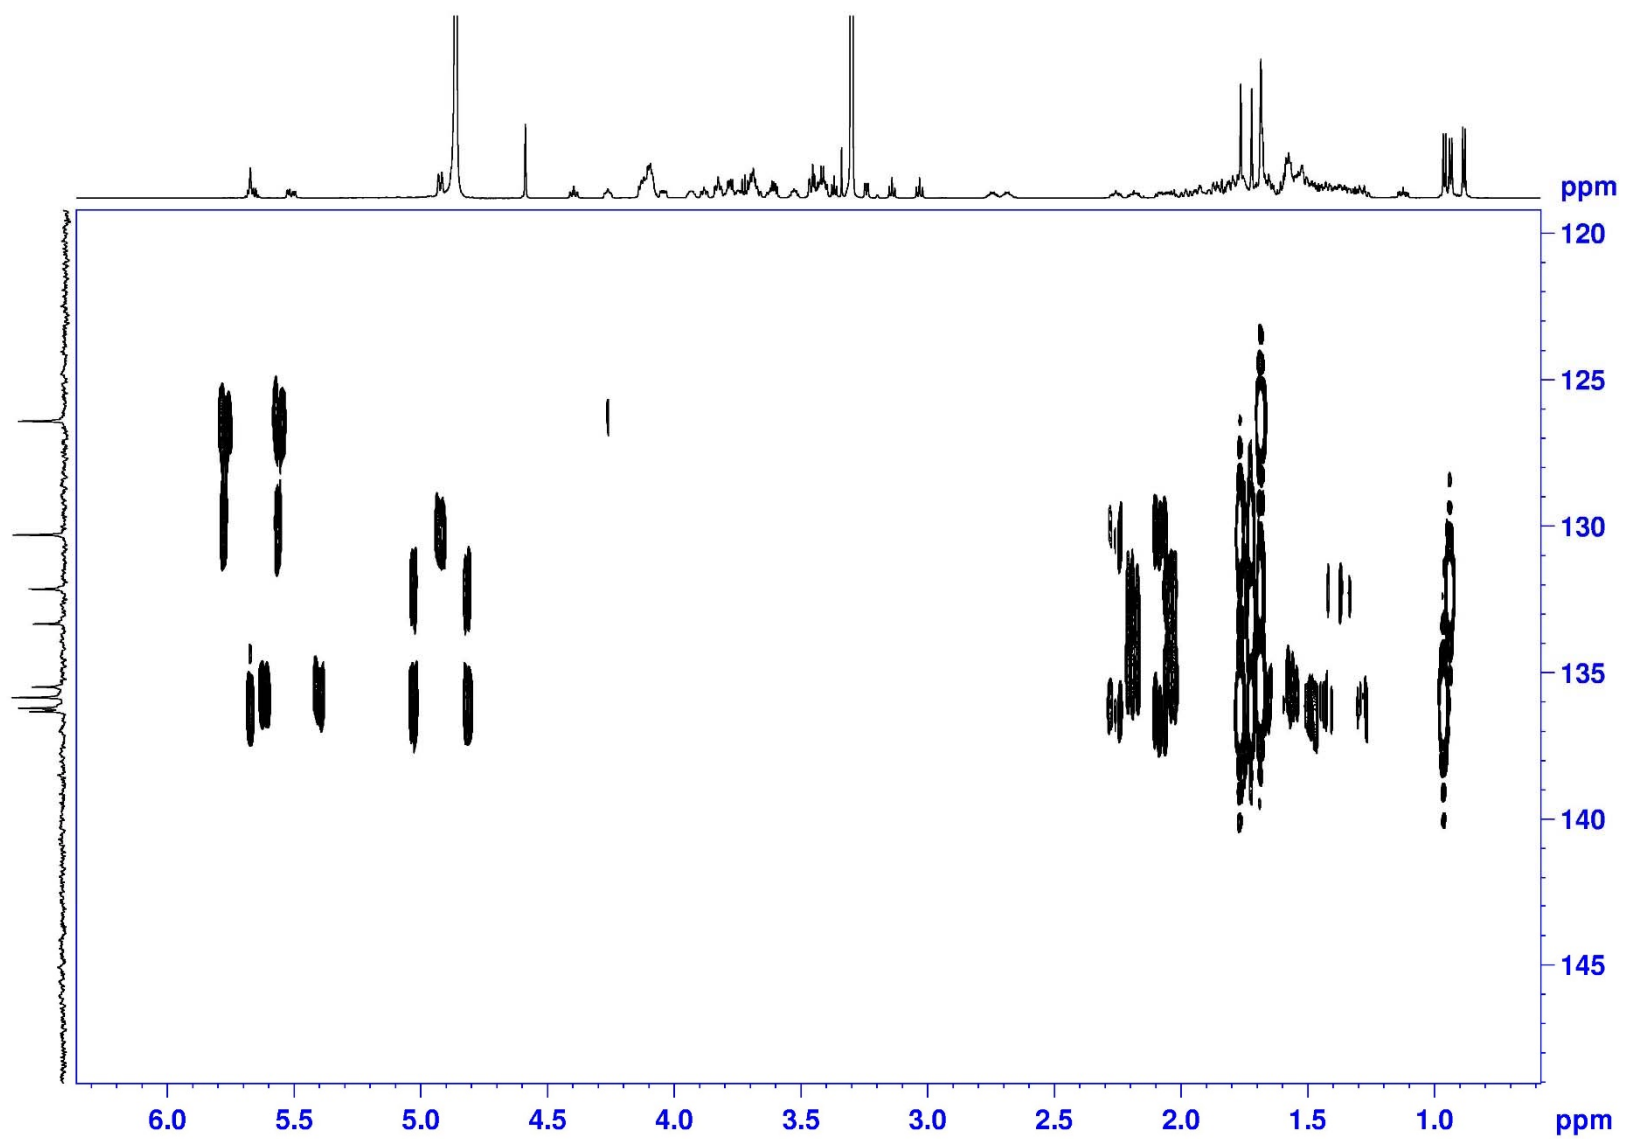

HMBC (700 MHz) spectrum of compound **1** in CD<sub>3</sub>OD

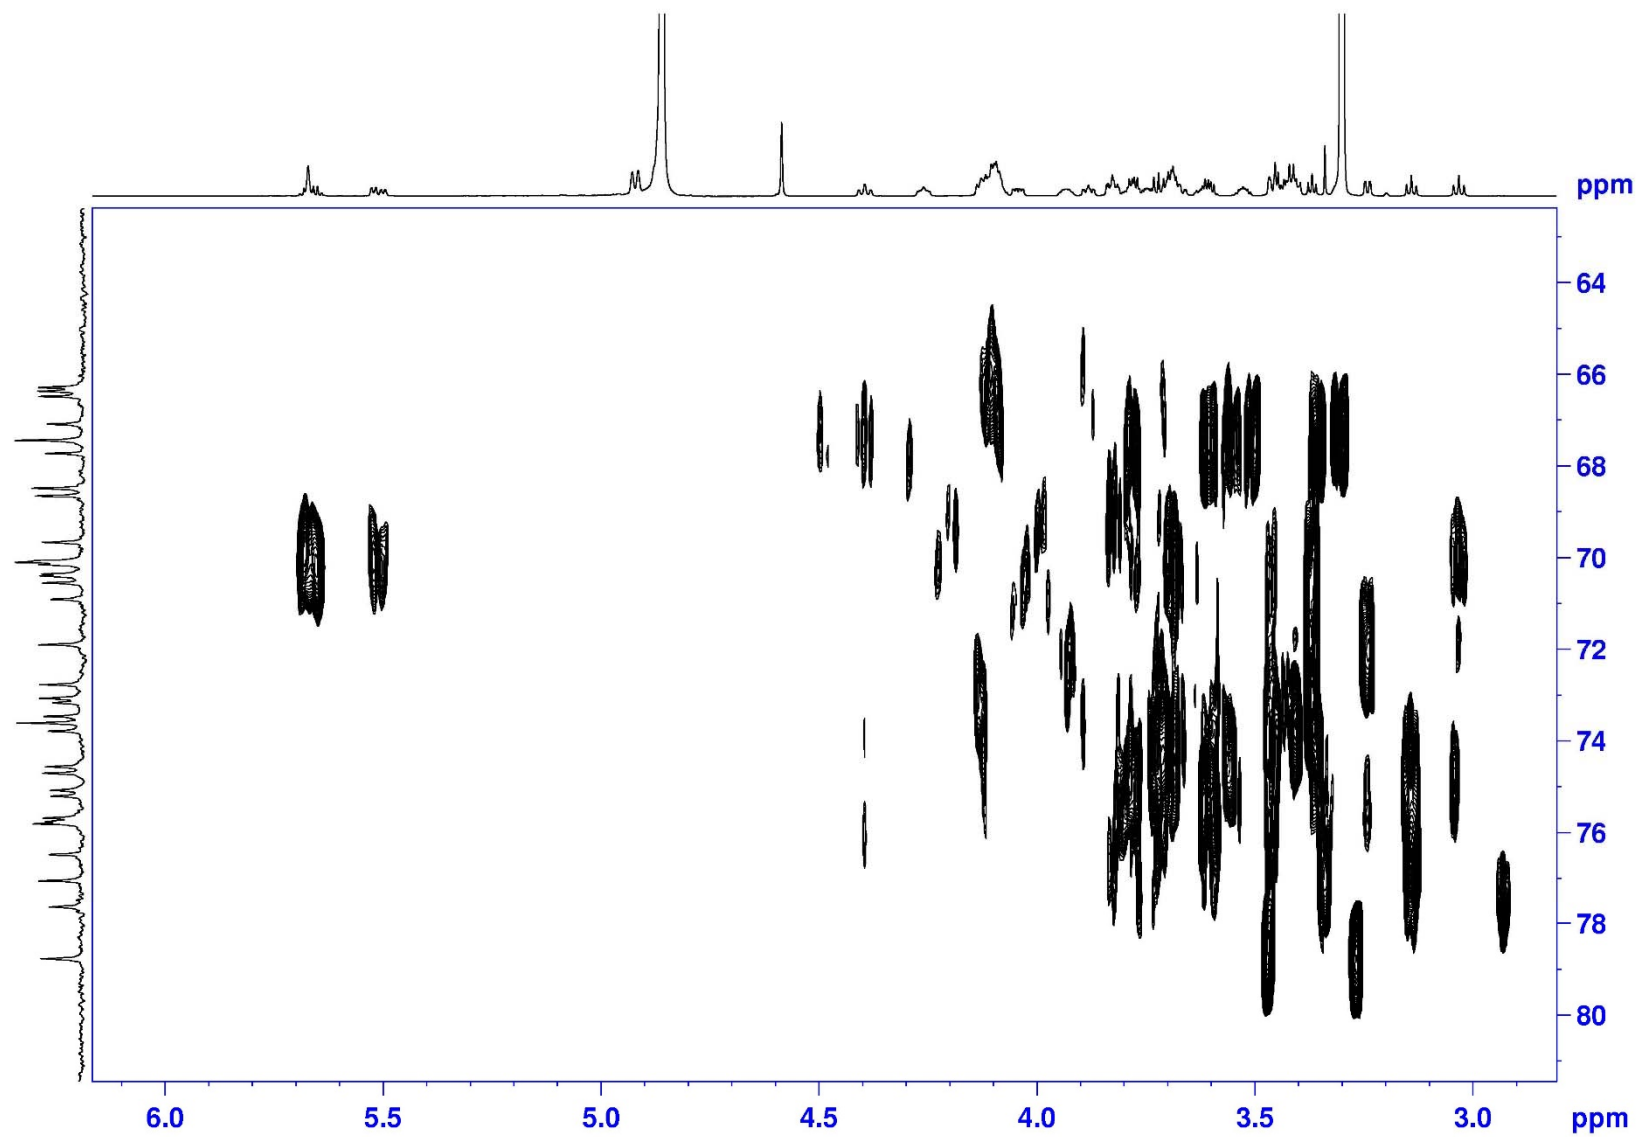

HMBC (700 MHz) spectrum of compound **1** in CD<sub>3</sub>OD

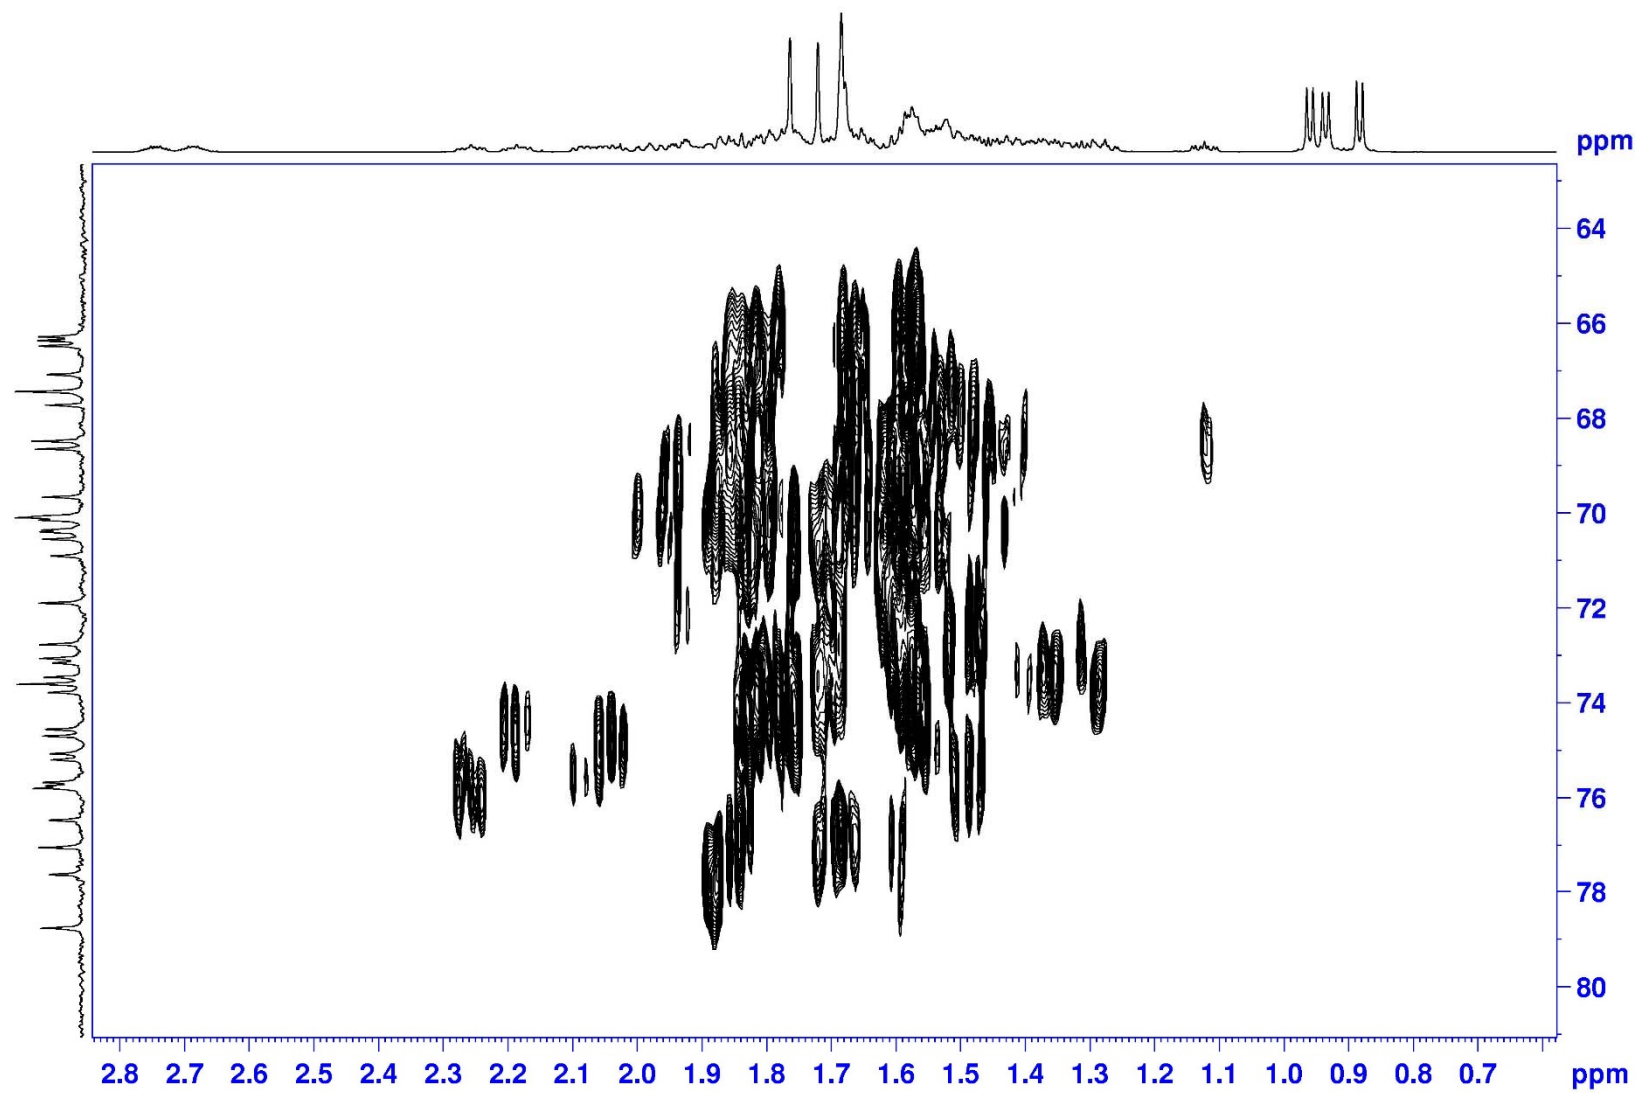

HMBC (700 MHz) spectrum of compound **1** in CD<sub>3</sub>OD

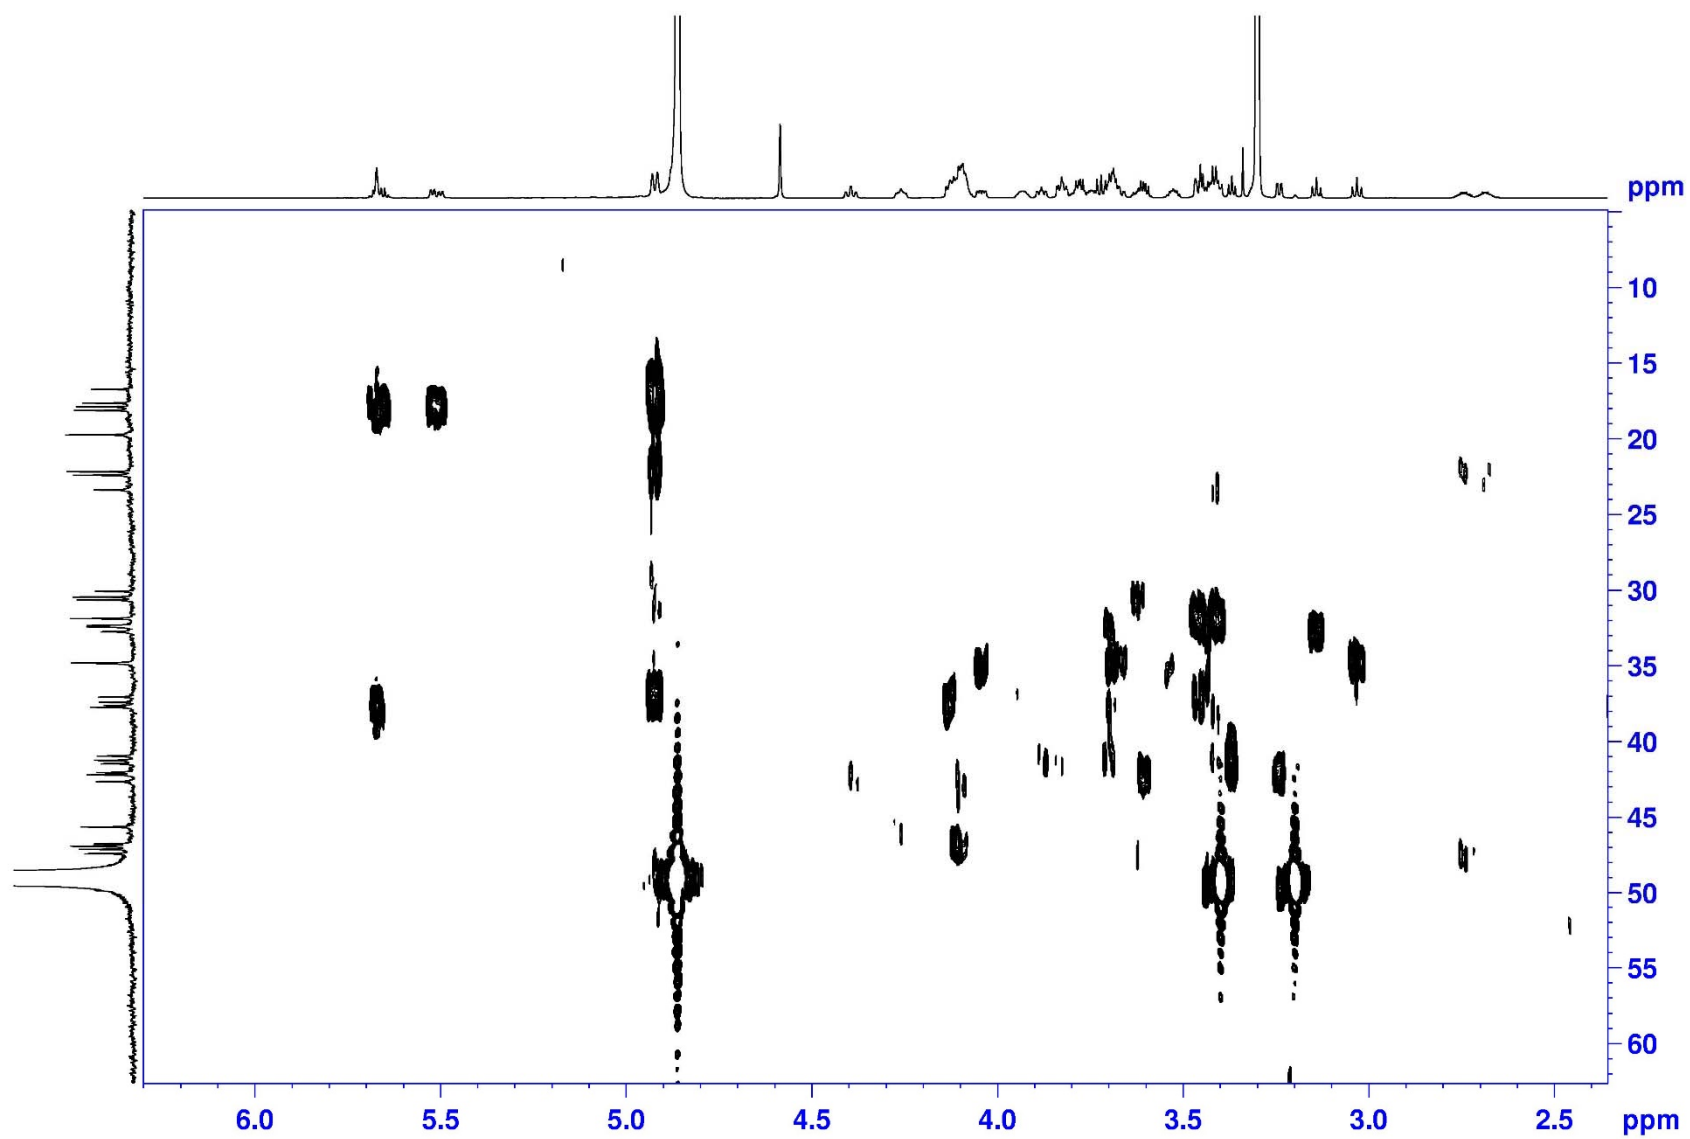

HMBC (700 MHz) spectrum of compound **1** in CD<sub>3</sub>OD

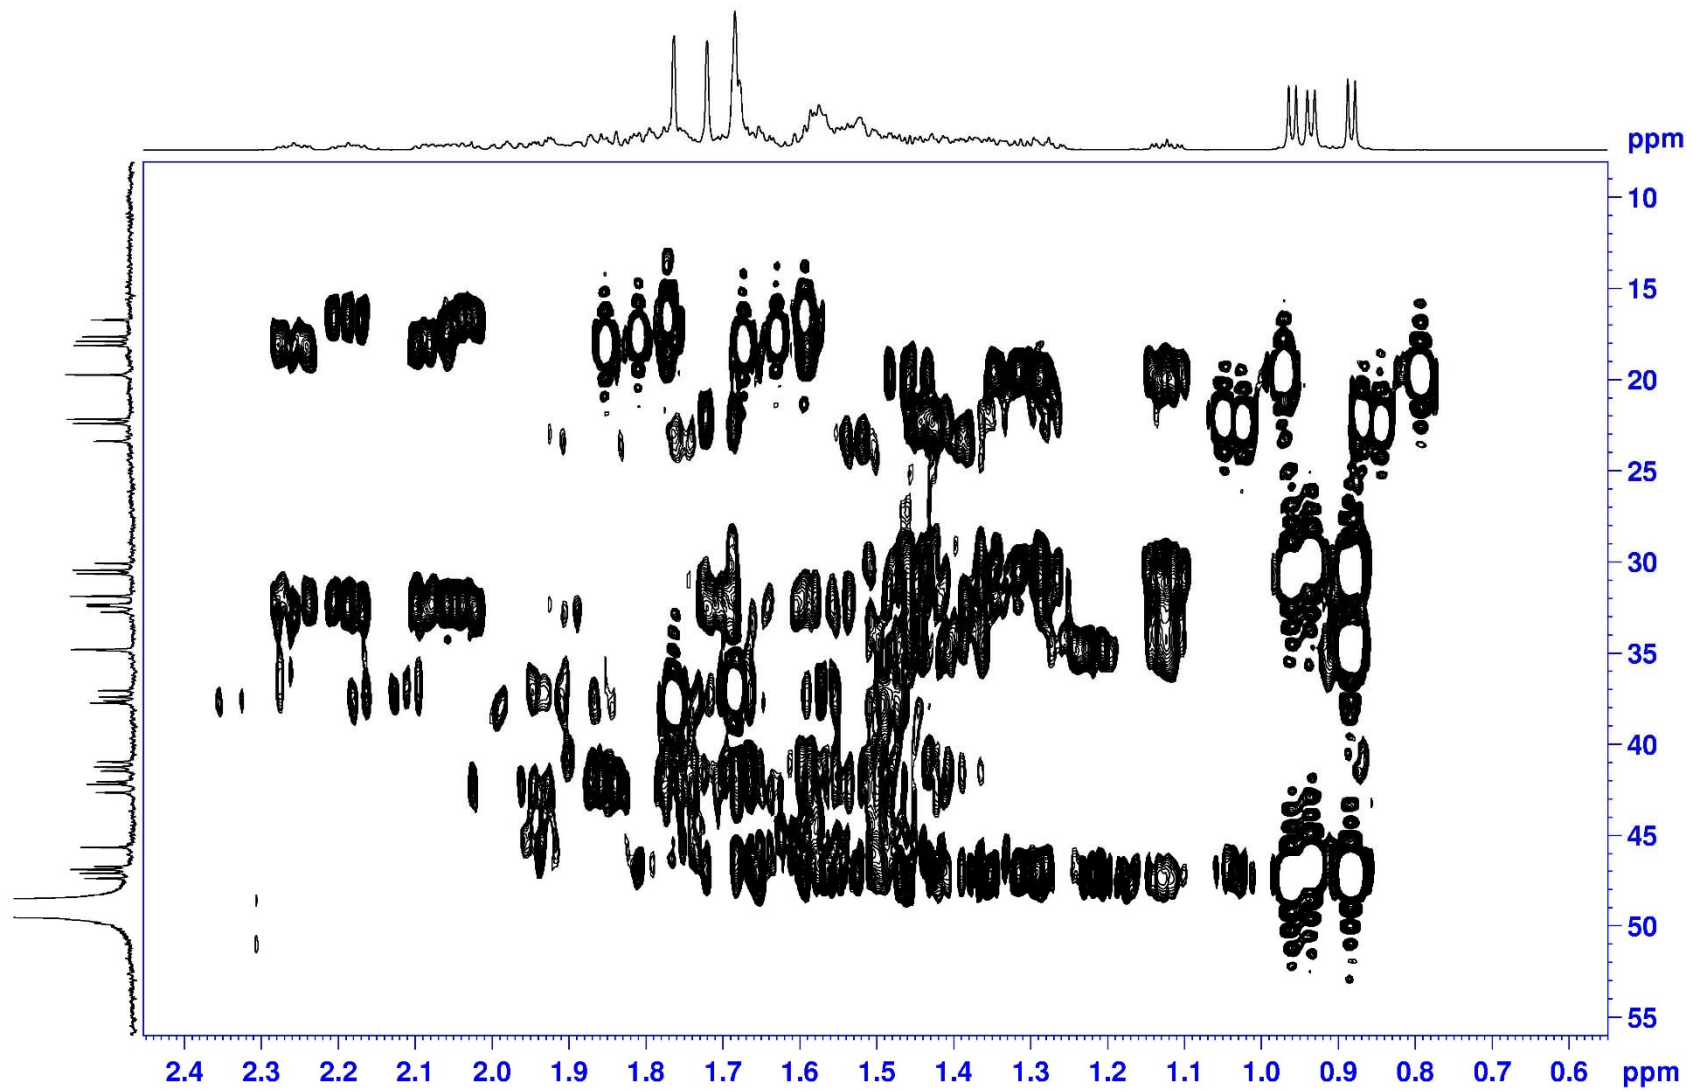

# H2BC (700 MHz) spectrum of compound 1 in CD<sub>3</sub>OD

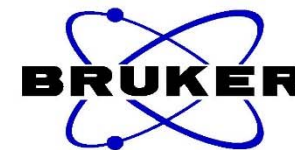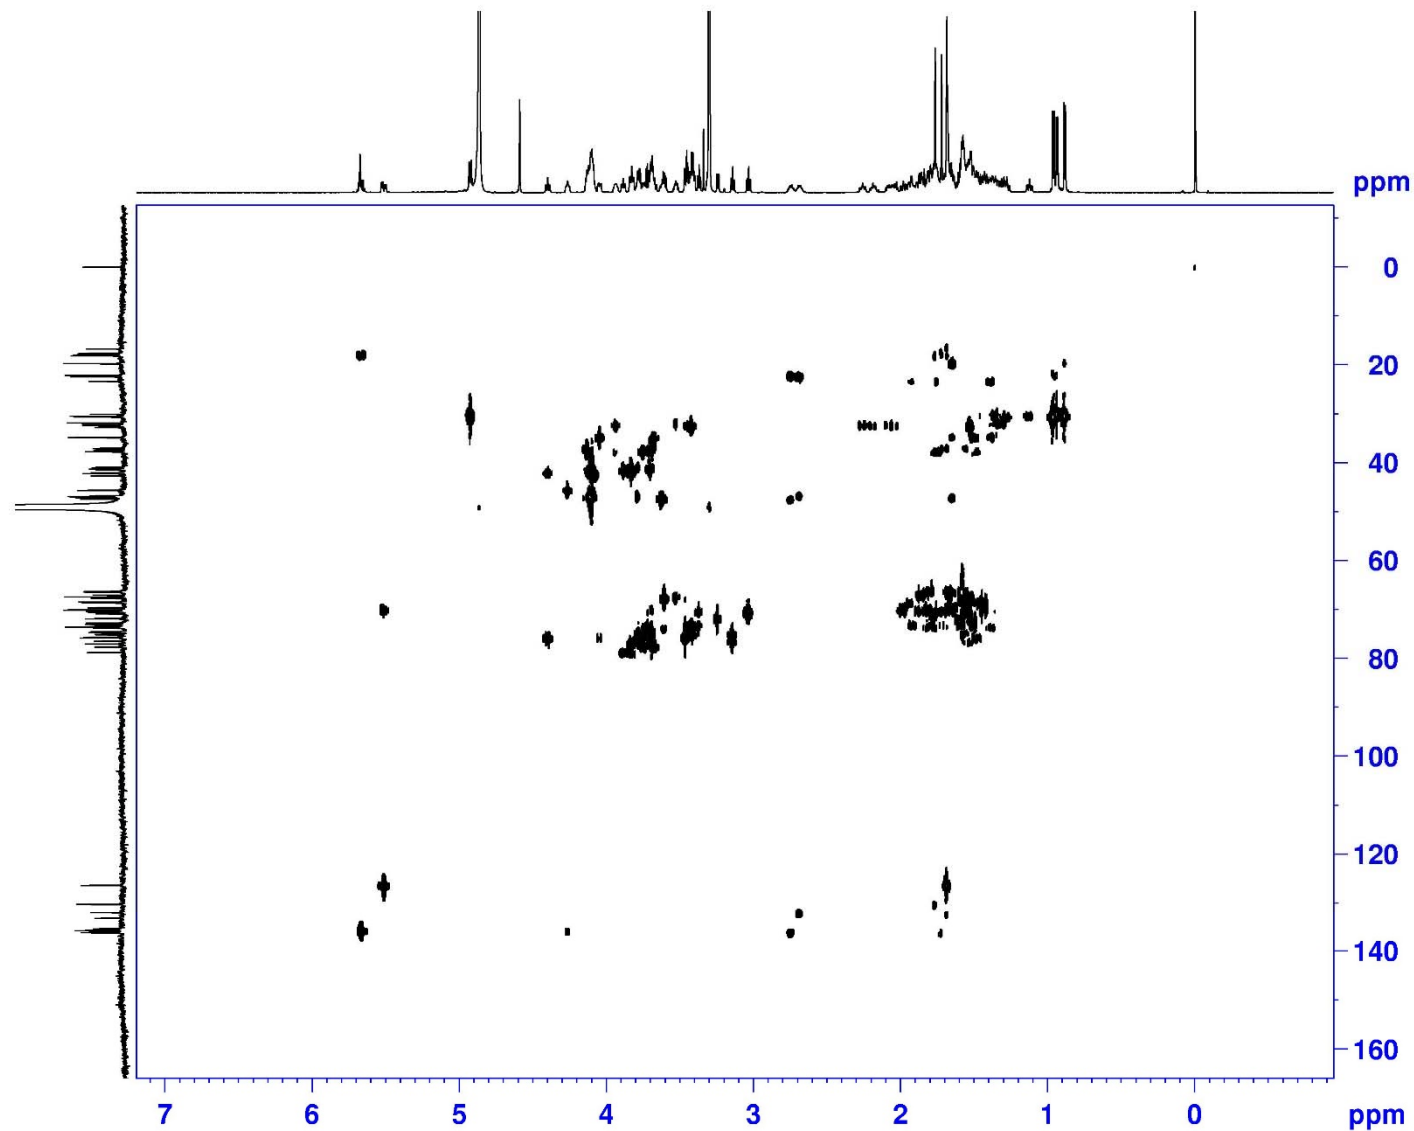

ppm

0

20

40

60

80

100

120

140

160

ppm

|         |                  |
|---------|------------------|
| NAME    | liwanshan-40-2-2 |
| EXPNO   | 20               |
| PROCNO  | 1                |
| Date_   | 20190529         |
| Time    | 11.06 h          |
| INSTRUM | spect            |
| PROBHD  | Z120187_0028 (   |
| PULPROG | h2bcetgp13       |
| TD      | 1024             |
| SOLVENT | MeOD             |
| NS      | 24               |
| DS      | 16               |
| SWH     | 5699.088 Hz      |
| FIDRES  | 11.131032 Hz     |
| AQ      | 0.0898889 s      |
| RG      | 181.26           |
| DW      | 87.733 us        |
| DE      | 10.00 us         |
| TE      | 298.0 K          |
| CNST6   | 120.000000       |
| CNST7   | 170.000000       |
| D0      | 0.00000300 s     |
| D1      | 1.50000000 s     |
| D11     | 0.03000000 s     |
| D16     | 0.00020000 s     |
| D20     | 0.00211462 s     |
| D21     | 0.02000000 s     |
| D28     | 0.00653282 s     |
| IN0     | 0.00001590 s     |
| IN20    | 0.00001590 s     |
| IN28    | 0.00001590 s     |
| ND0     | 2                |
| TD      | 256              |
| SFO1    | 176.0739 MHz     |
| FIDRES  | 122.838051 Hz    |
| SW      | 178.599 MHz      |
| FnMODE  | Echo-Antiecho    |
| SI      | 1024             |
| SF      | 700.1800207 MHz  |
| WDW     | SINE             |
| SSB     | 4                |
| LB      | 0.00 Hz          |
| GB      | 0                |
| PC      | 1.40             |
| SI      | 8192             |
| MC2     | echo-antiecho    |
| SF      | 176.0601526 MHz  |
| WDW     | SINE             |
| SSB     | 2                |

# H2BC (700 MHz) spectrum of compound 1 in CD<sub>3</sub>OD

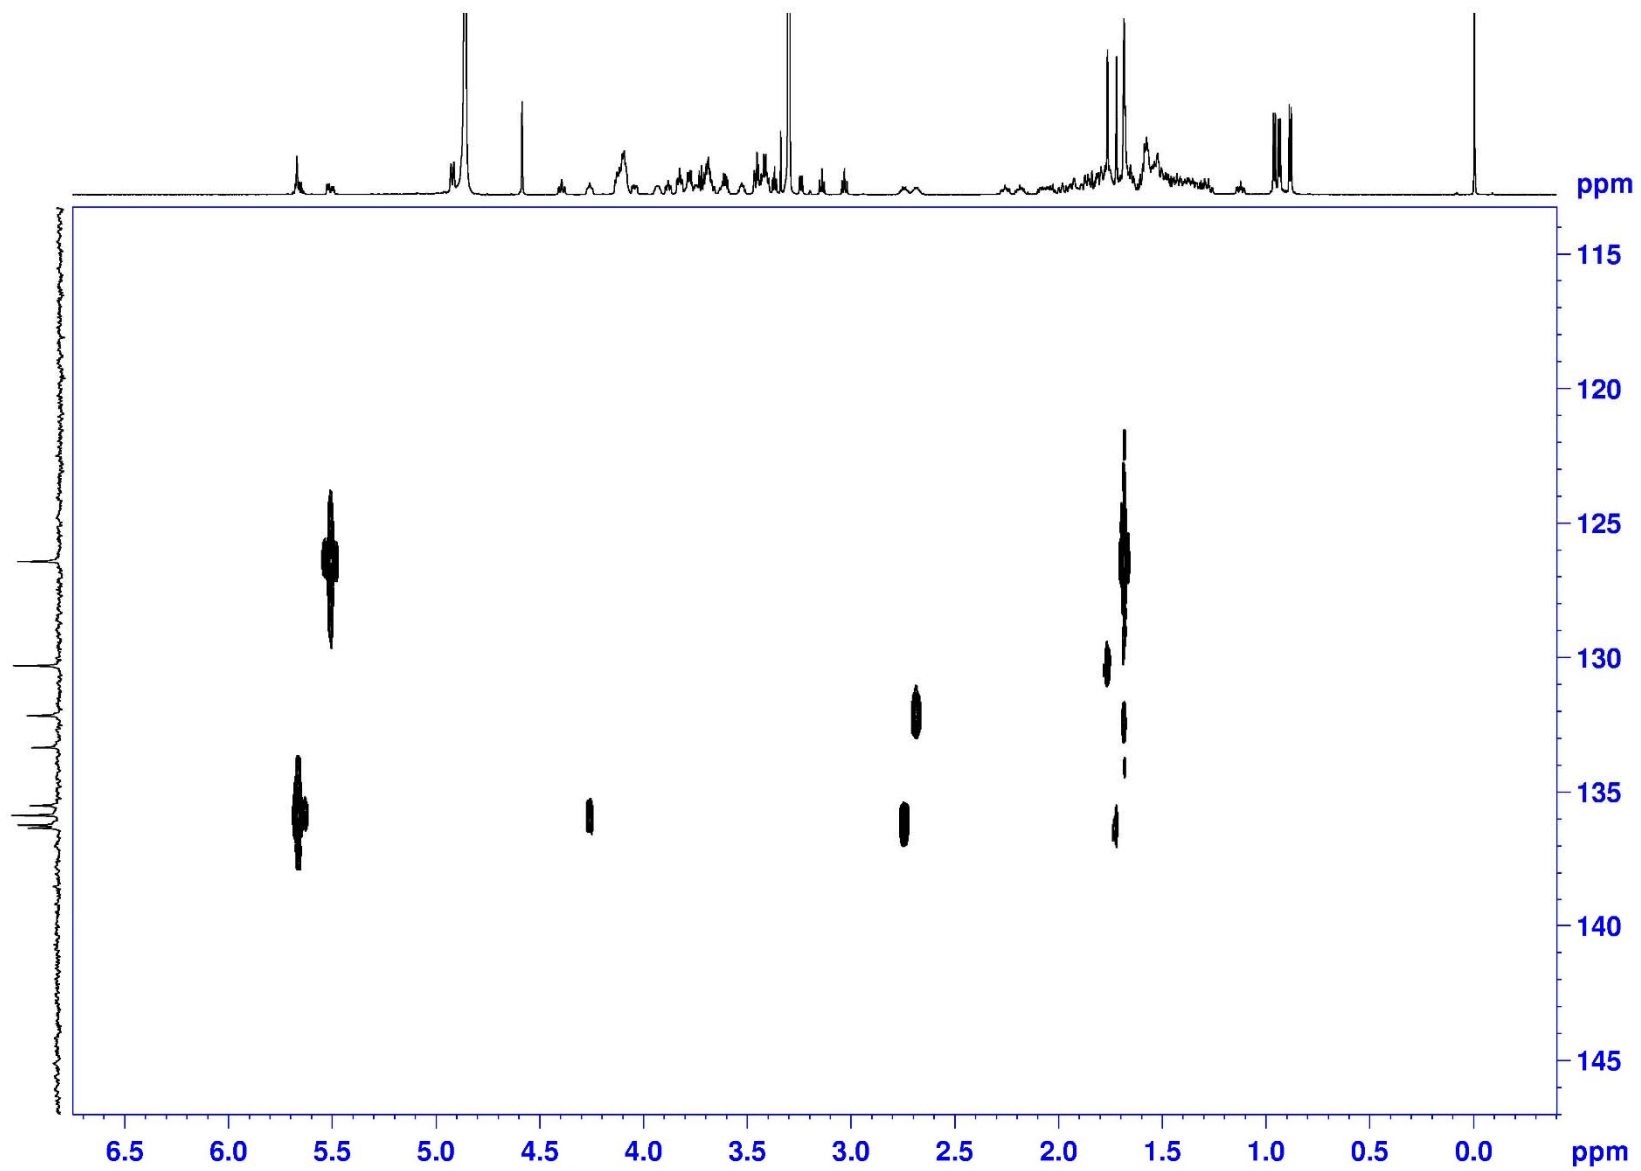

H2BC (700 MHz) spectrum of compound **1** in CD<sub>3</sub>OD

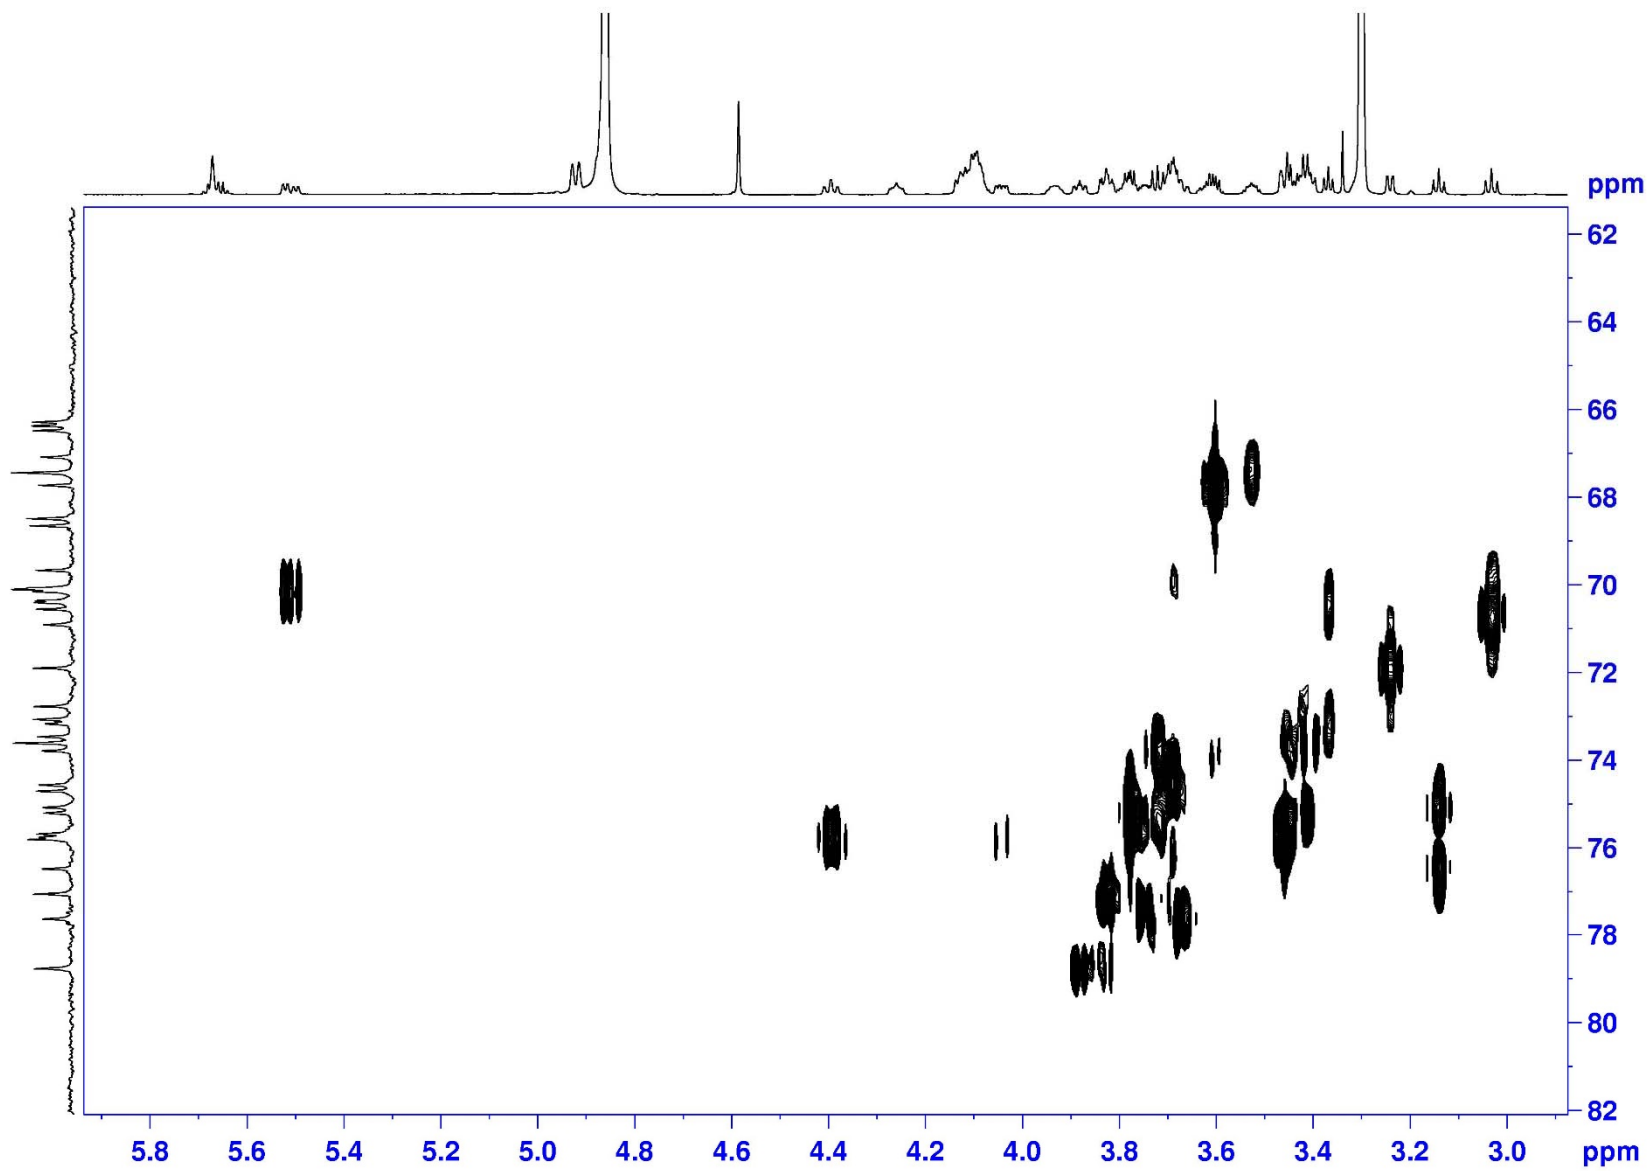



# H2BC (700 MHz) spectrum of compound 1 in CD<sub>3</sub>OD

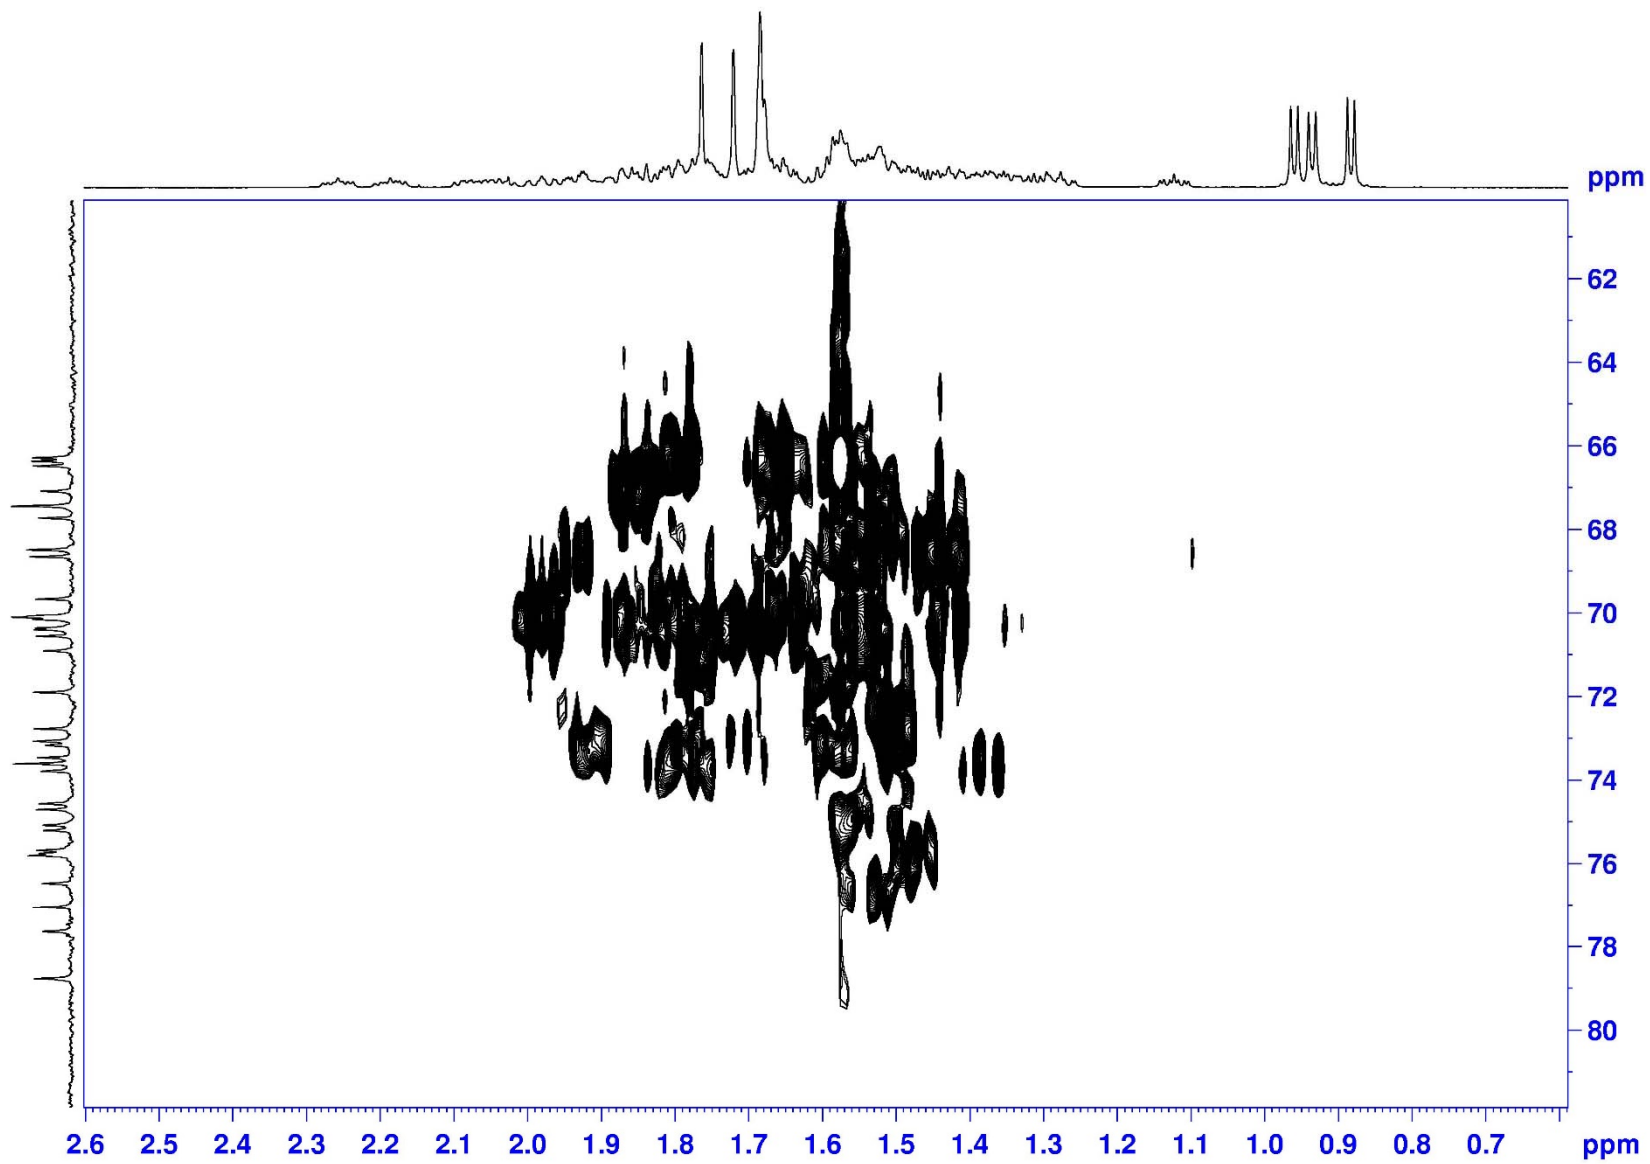

H2BC (700 MHz) spectrum of compound **1** in CD<sub>3</sub>OD

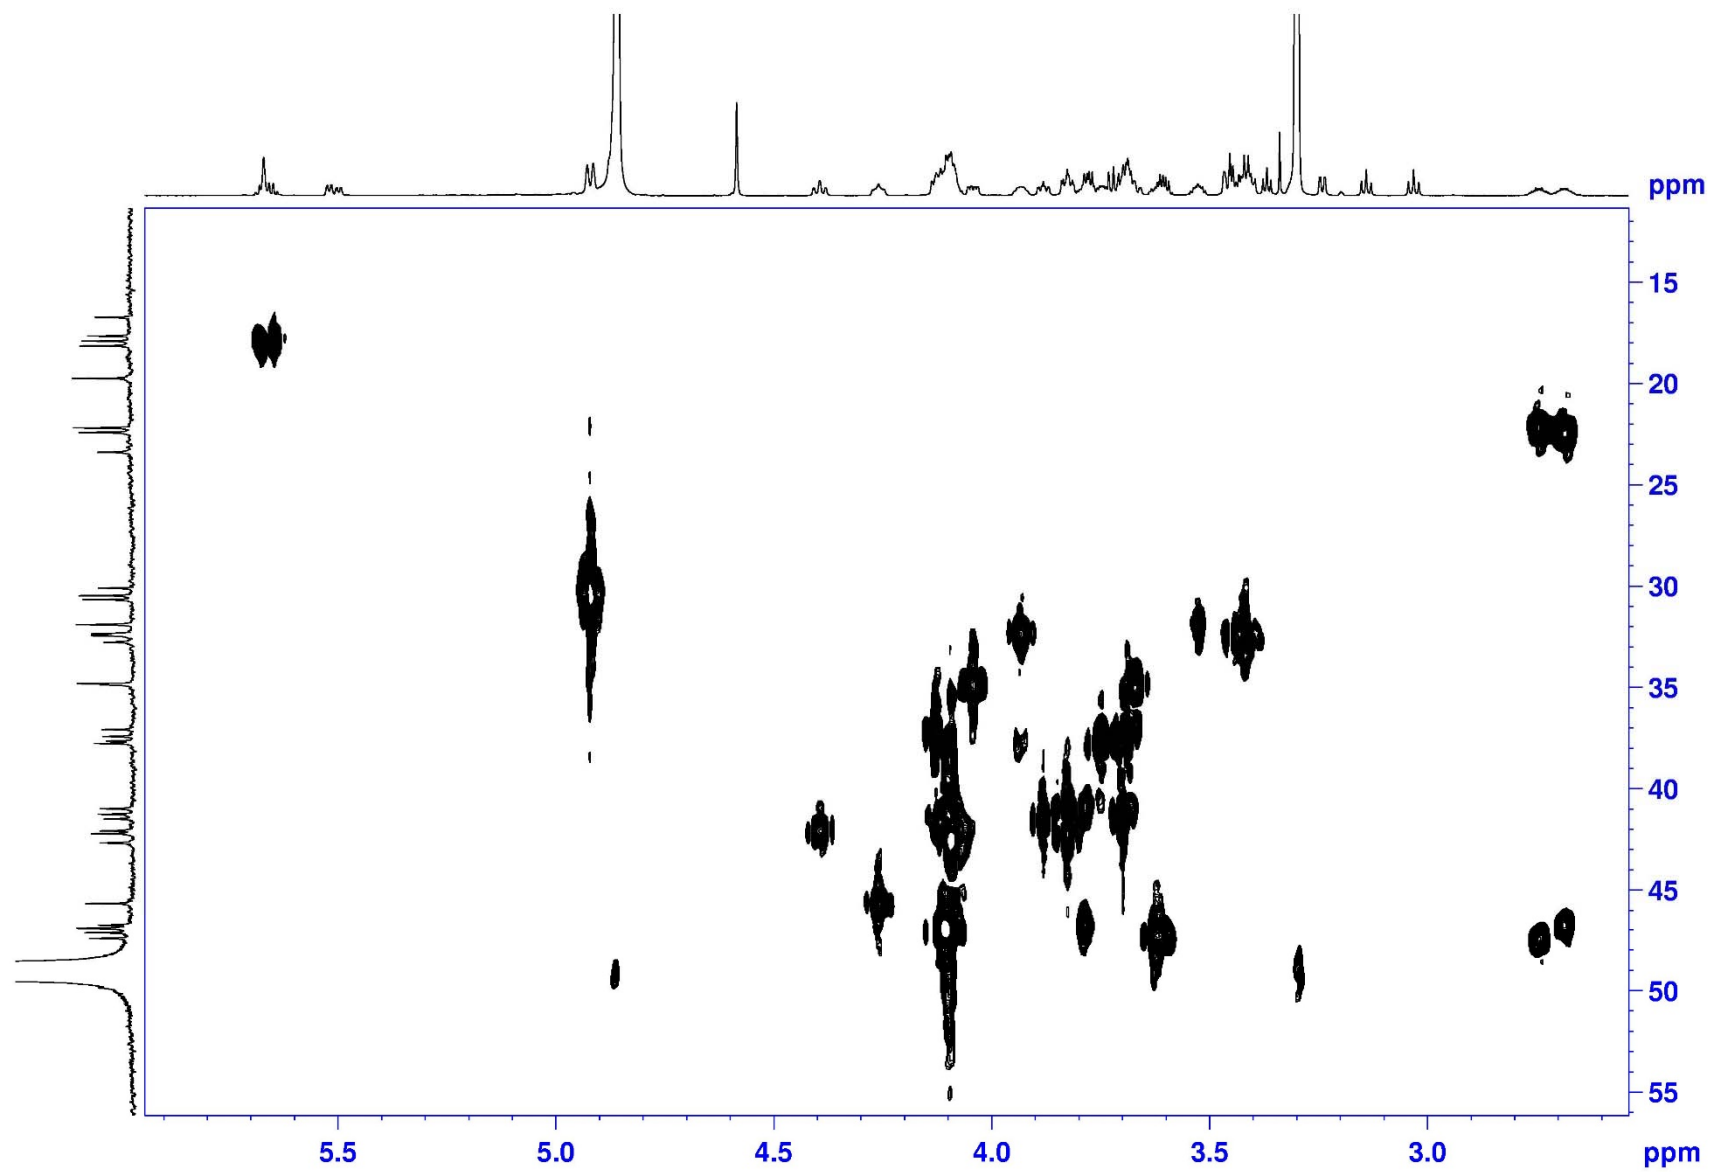

H2BC (700 MHz) spectrum of compound **1** in CD<sub>3</sub>OD

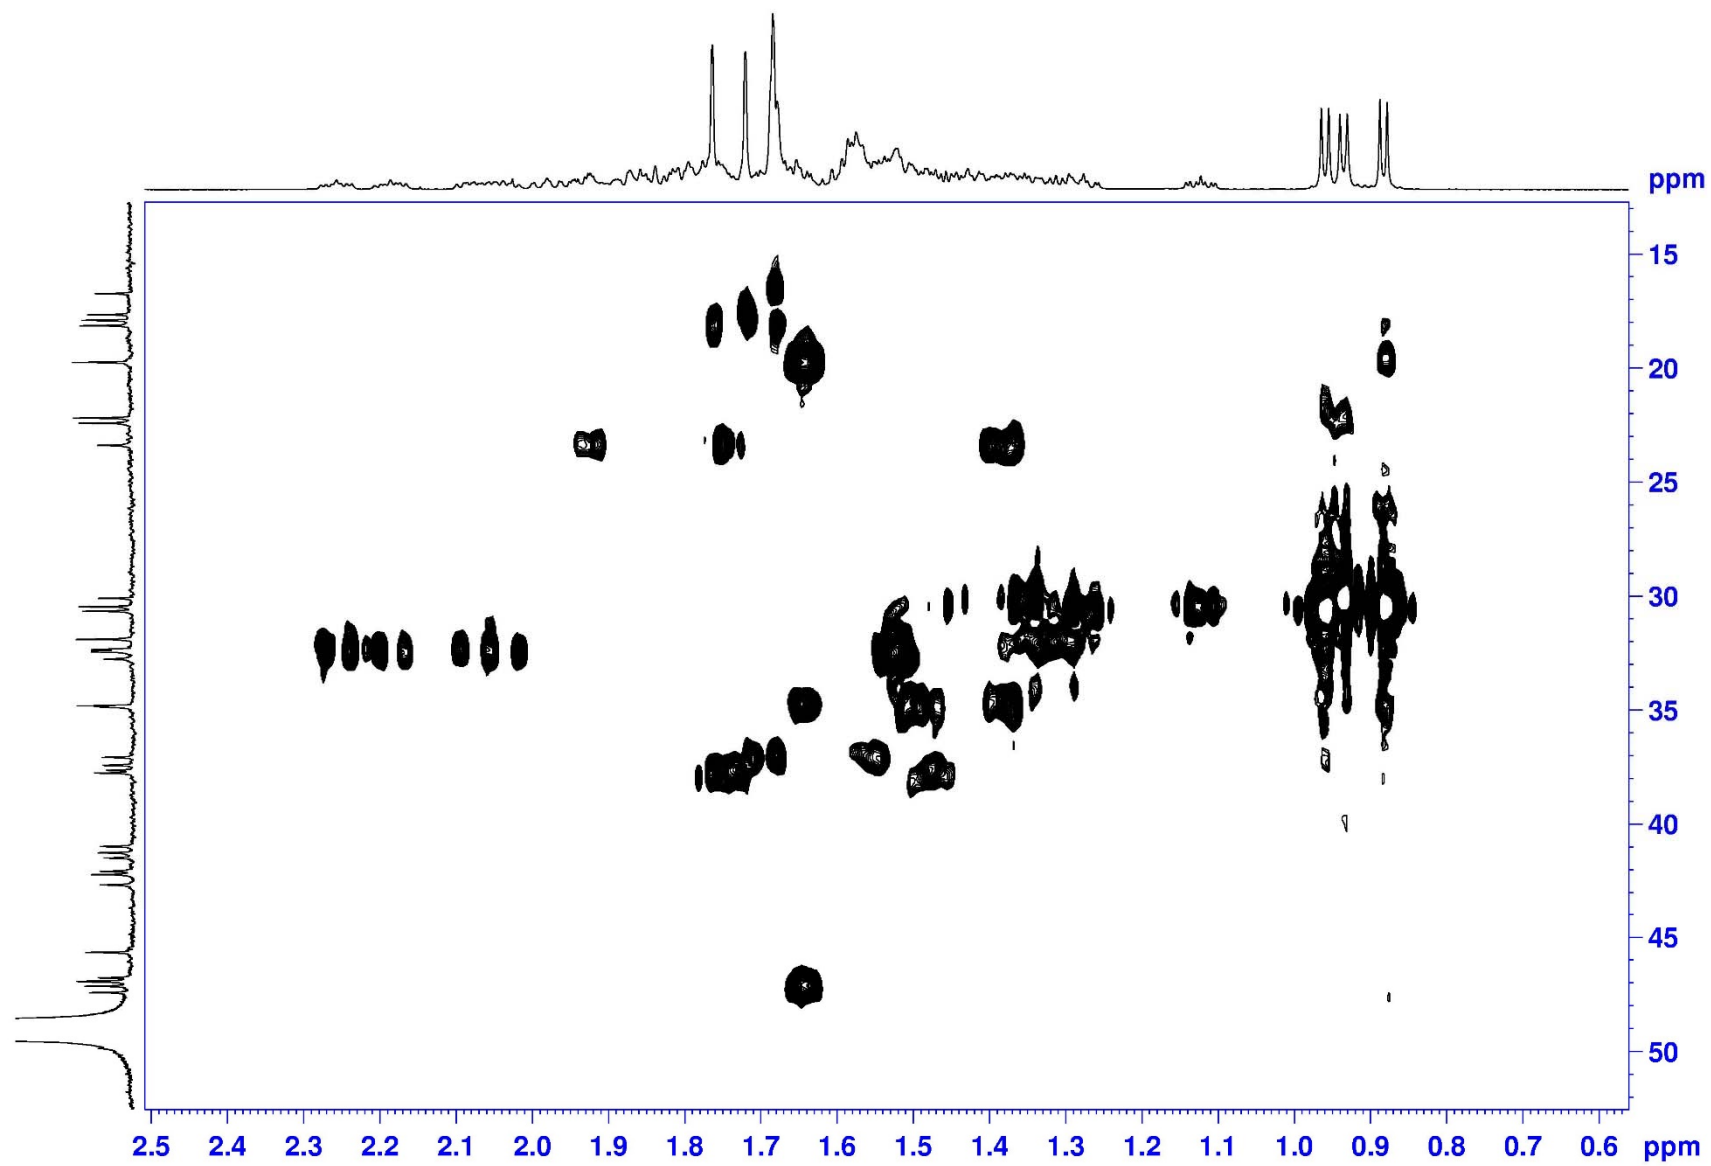

# NOESY (700 MHz) spectrum of compound 1 in CD<sub>3</sub>OD

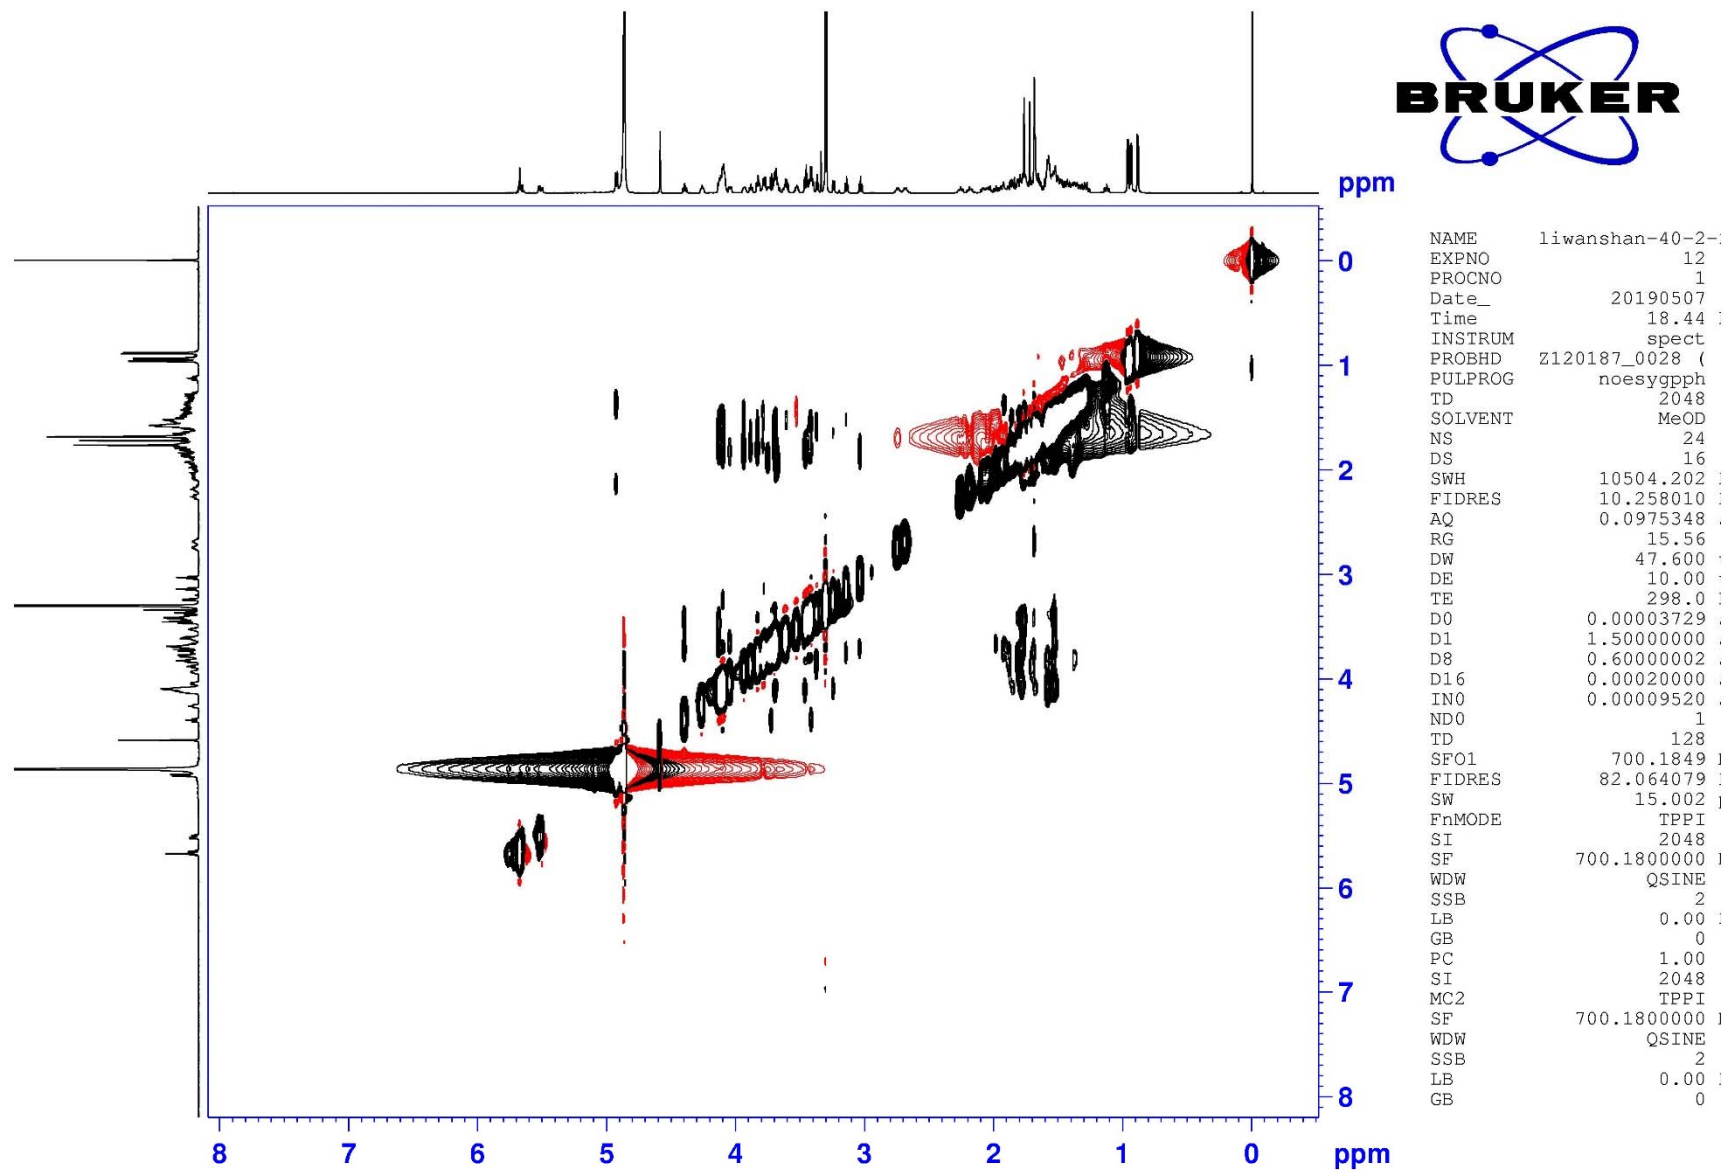

NOESY (700 MHz) spectrum of compound **1** in CD<sub>3</sub>OD

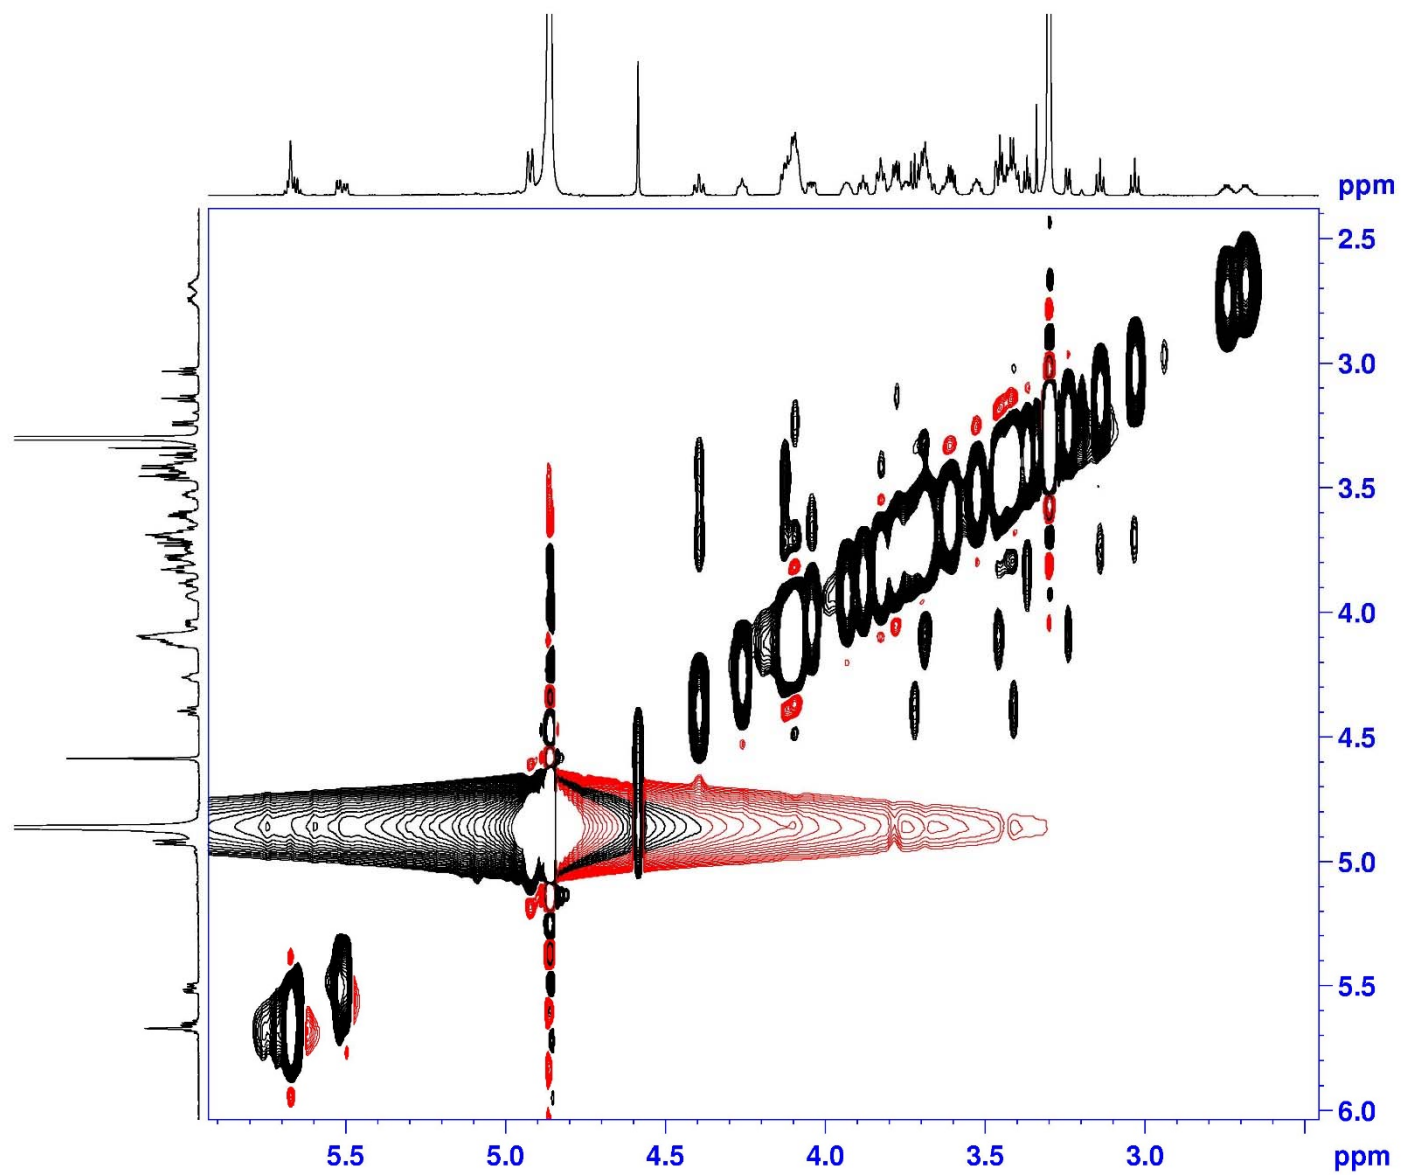

NOESY (700 MHz) spectrum of compound **1** in CD<sub>3</sub>OD

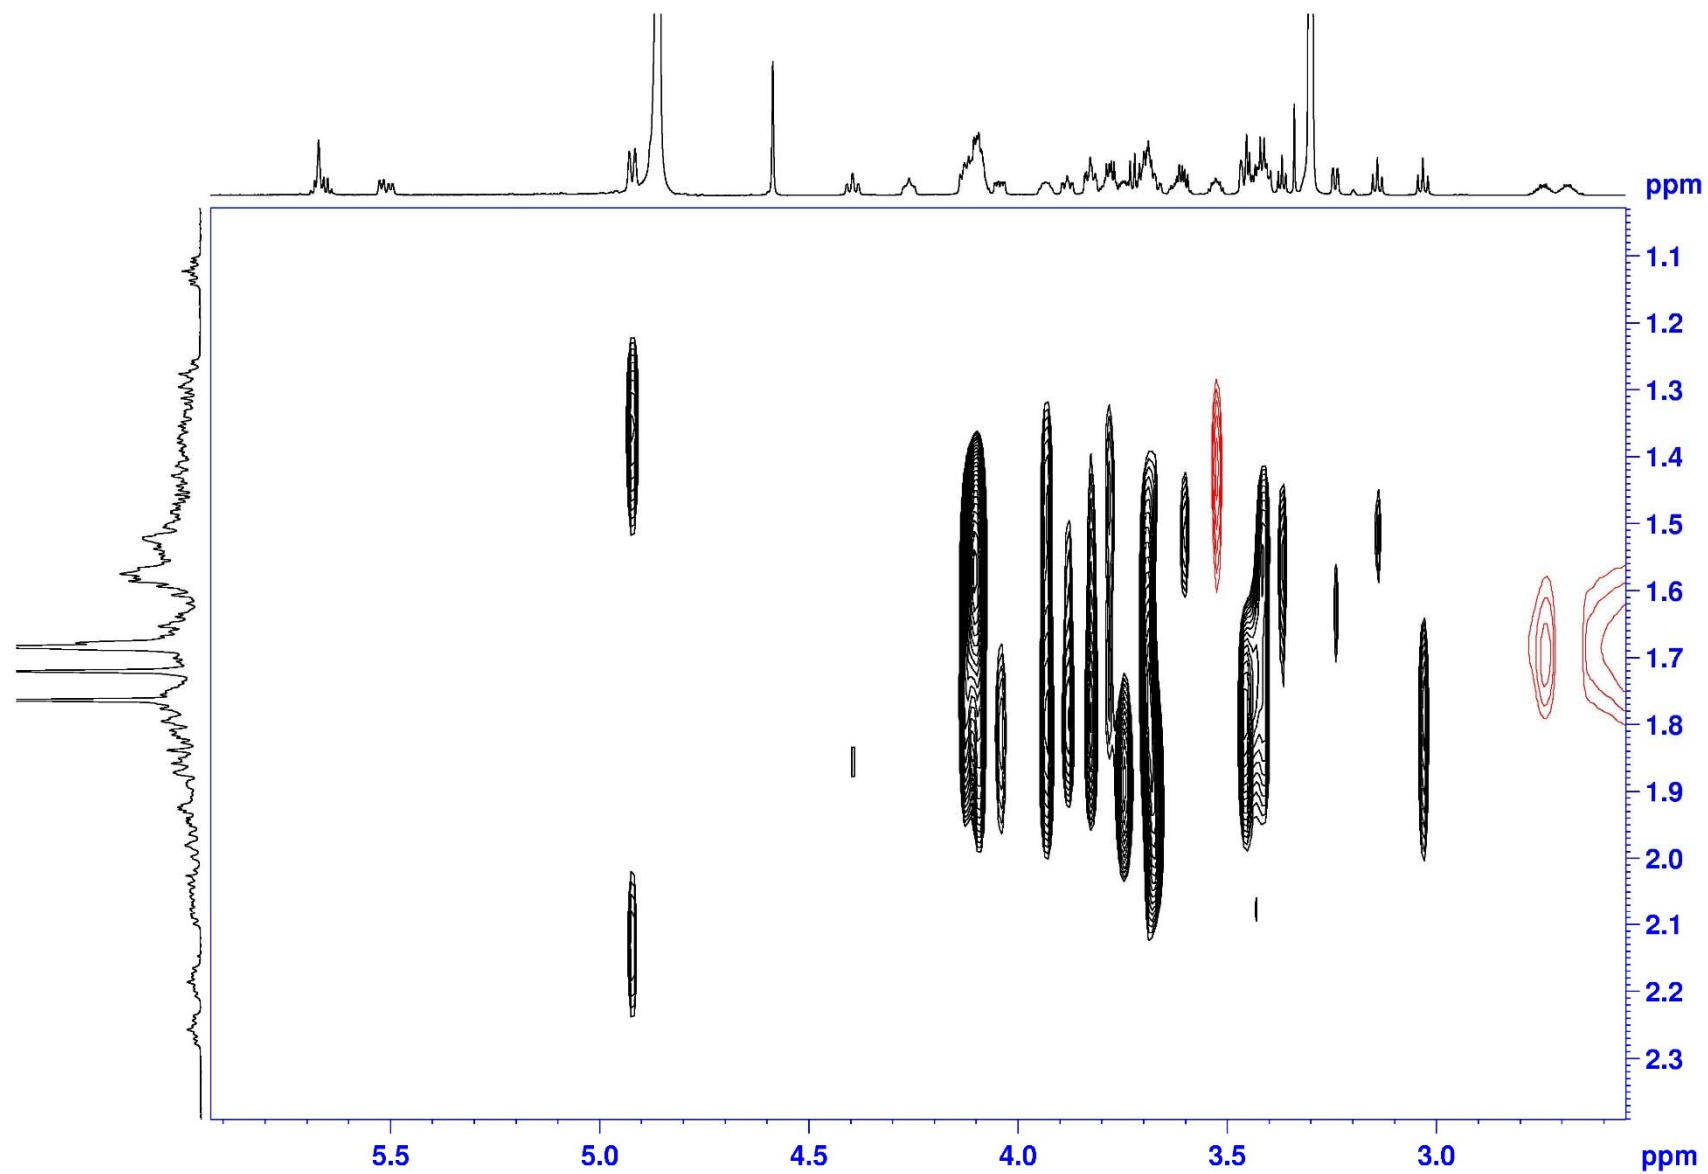

$^{13}\text{C}$  (175 MHz) NMR spectrum of compound **1** in  $\text{CD}_3\text{OH}$

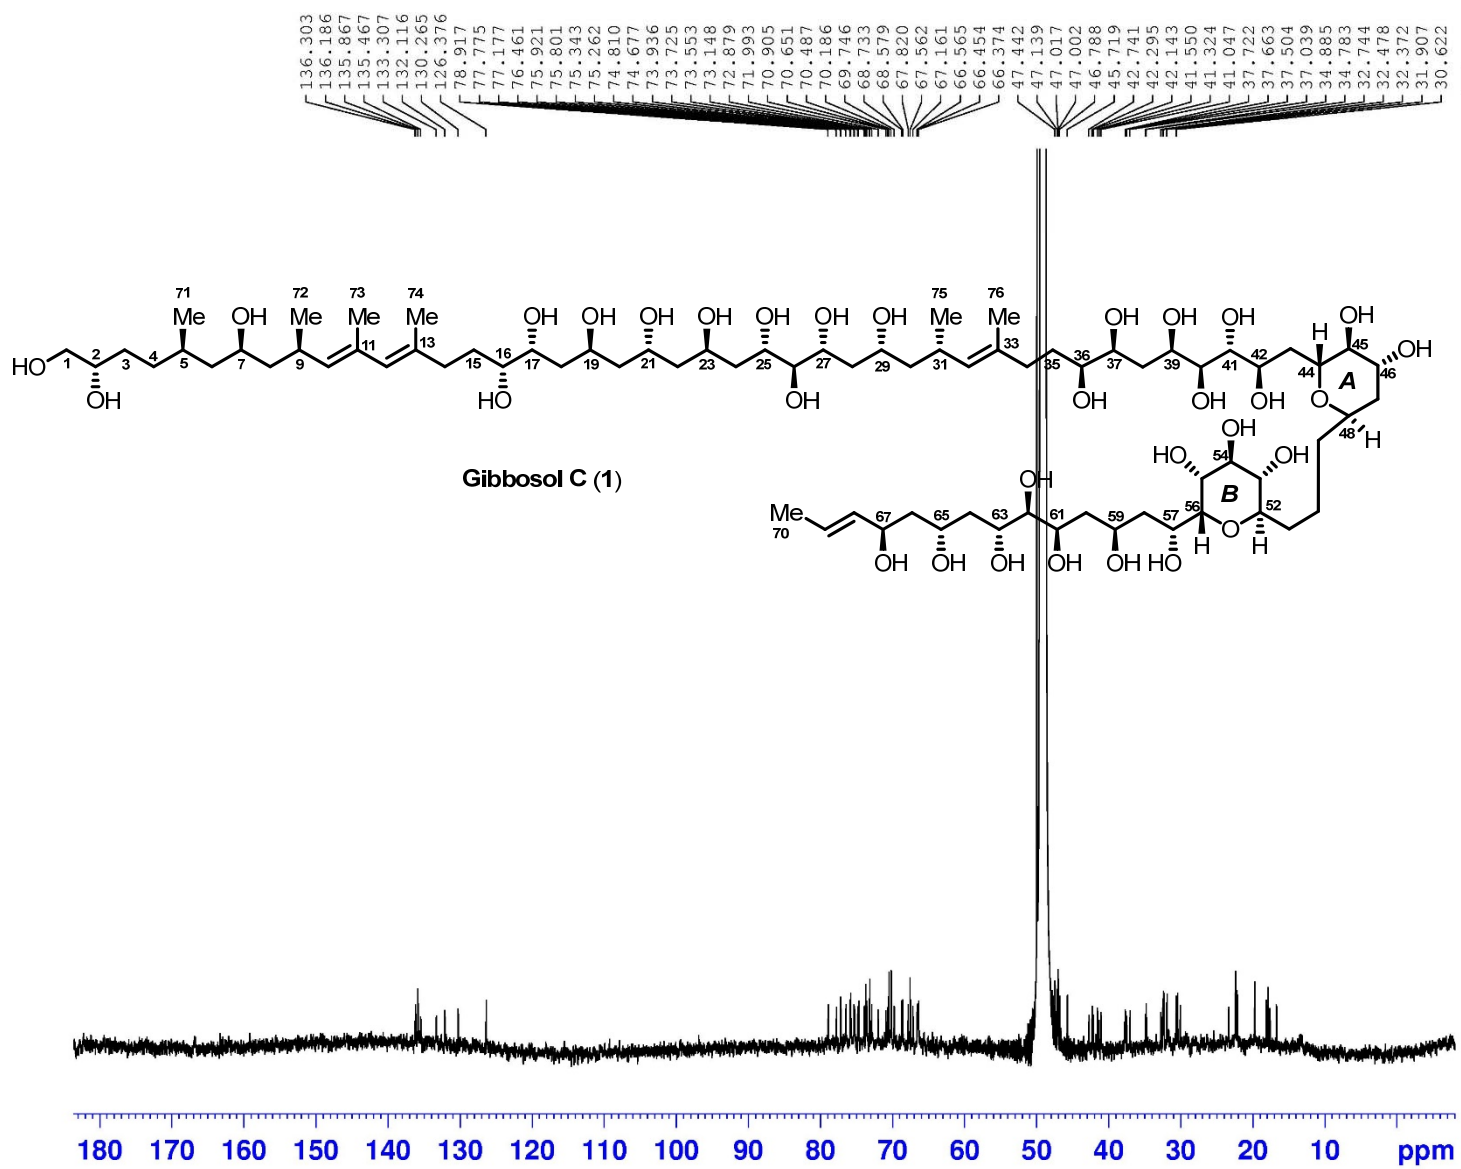

136.303  
136.186  
135.867  
135.467  
133.307  
132.116  
130.265  
126.376  
78.917  
77.775  
77.177  
76.461  
75.921  
75.801  
75.343  
75.262  
74.810  
74.677  
73.936  
73.725  
73.553  
73.148  
72.879  
71.993  
70.905  
70.651  
70.487  
70.186  
69.746  
68.733  
68.579  
67.820  
67.562  
67.161  
66.565  
66.454  
66.374  
47.442  
47.139  
47.017  
47.002  
46.788  
45.719  
42.741  
42.295  
42.143  
41.550  
41.324  
41.047  
37.722  
37.663  
37.504  
37.039  
34.885  
34.783  
32.744  
32.478  
32.372  
31.907  
30.622

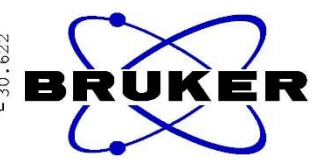

```

NAME      liwanshan-40-2-2-MEO
EXPNO     12
PROCNO    1
Date_     20200816
Time      2.44 h
INSTRUM   spect
PROBHD    Z120187_0028 {
PULPROG   zgpg30
TD         32768
SOLVENT   MeOD
NS         15000
DS         8
SWH        43859.648 Hz
FIDRES     2.676980 Hz
AQ         0.3736052 sec
RG         181.26
DW         11.400 usec
DE         18.00 usec
TE         298.0 K
D1         1.00000000 sec
D11        0.03000000 sec
TD0        1
SFO1      176.0797677 MHz
NUC1       13C
P1         11.90 usec
SI         32768
SF         176.0604010 MHz
WDW        EM
SSB        0
LB         4.00 Hz
GB         0
PC         1.40
    
```

# Comparison of $^{13}\text{C}$ (175 MHz) NMR spectrum of compound **1** in $\text{CD}_3\text{OH}$ with that in $\text{CD}_3\text{OD}$

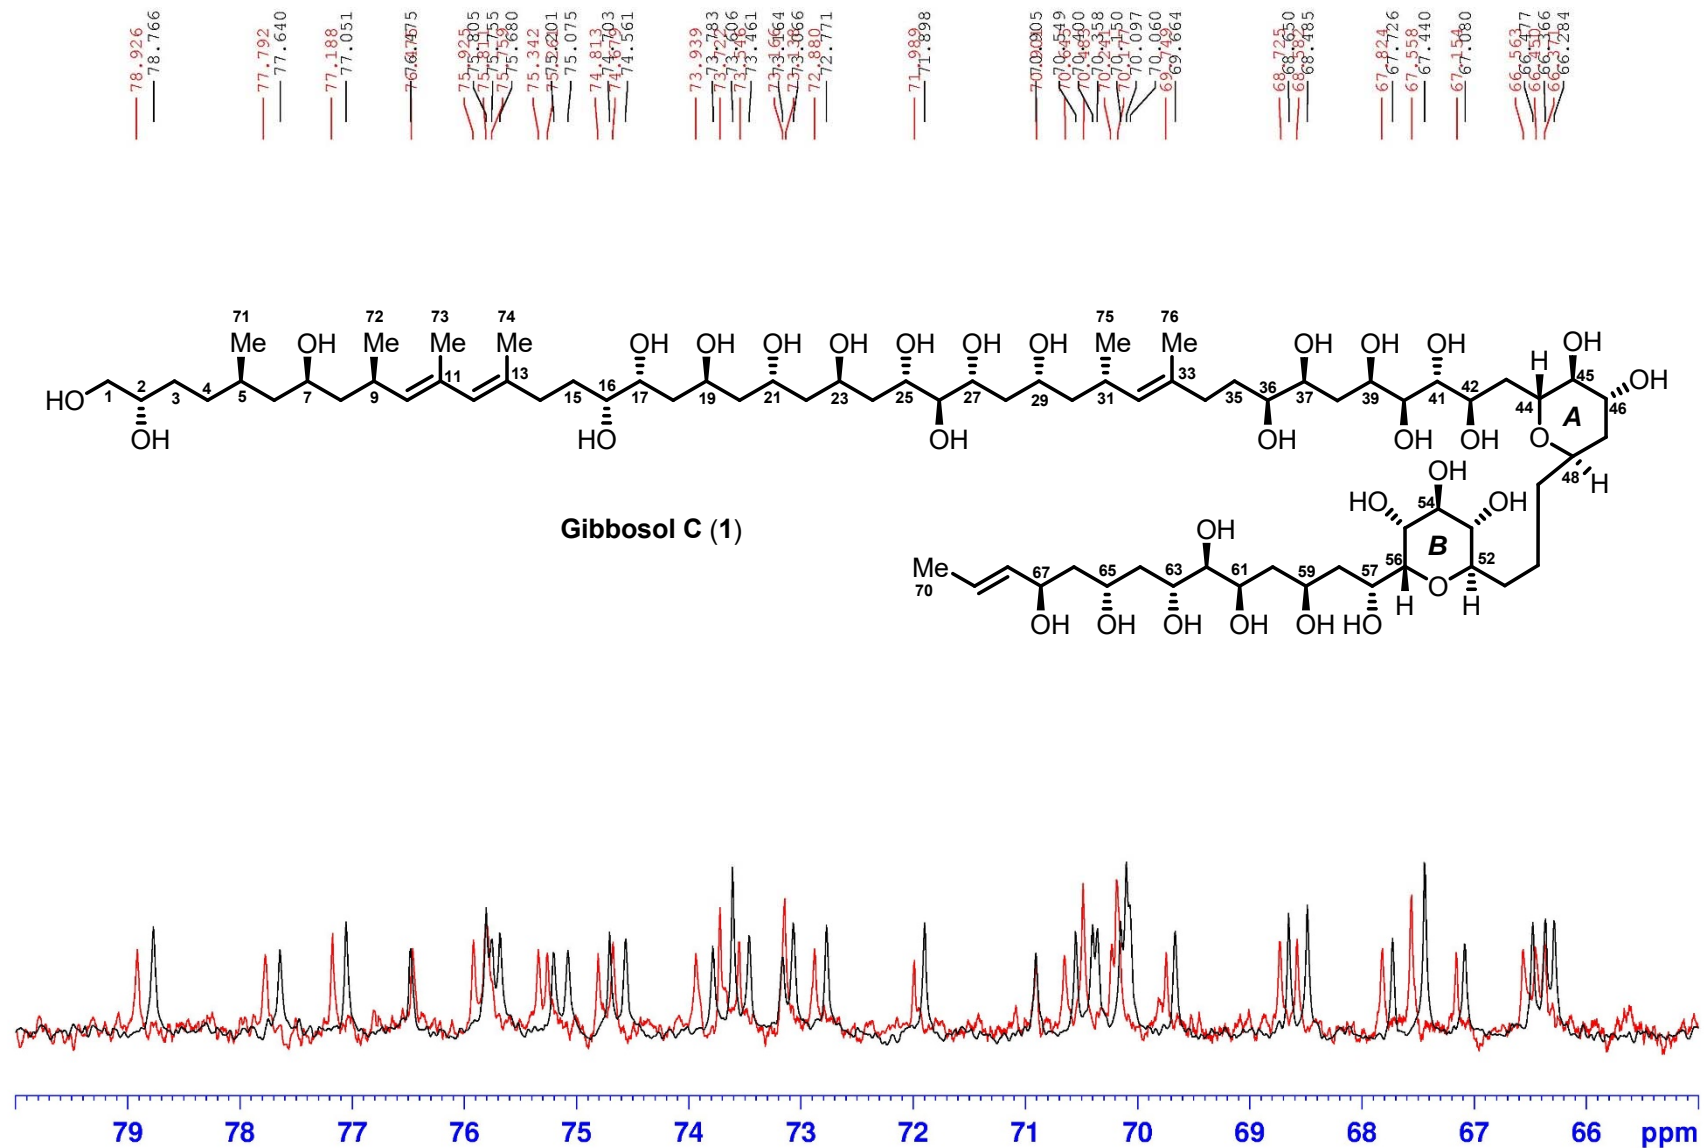



# Comparison of $^{13}\text{C}$ (175 MHz) NMR spectrum of compound **1** in $\text{CD}_3\text{OH}$ with that in $\text{CD}_3\text{OD}$

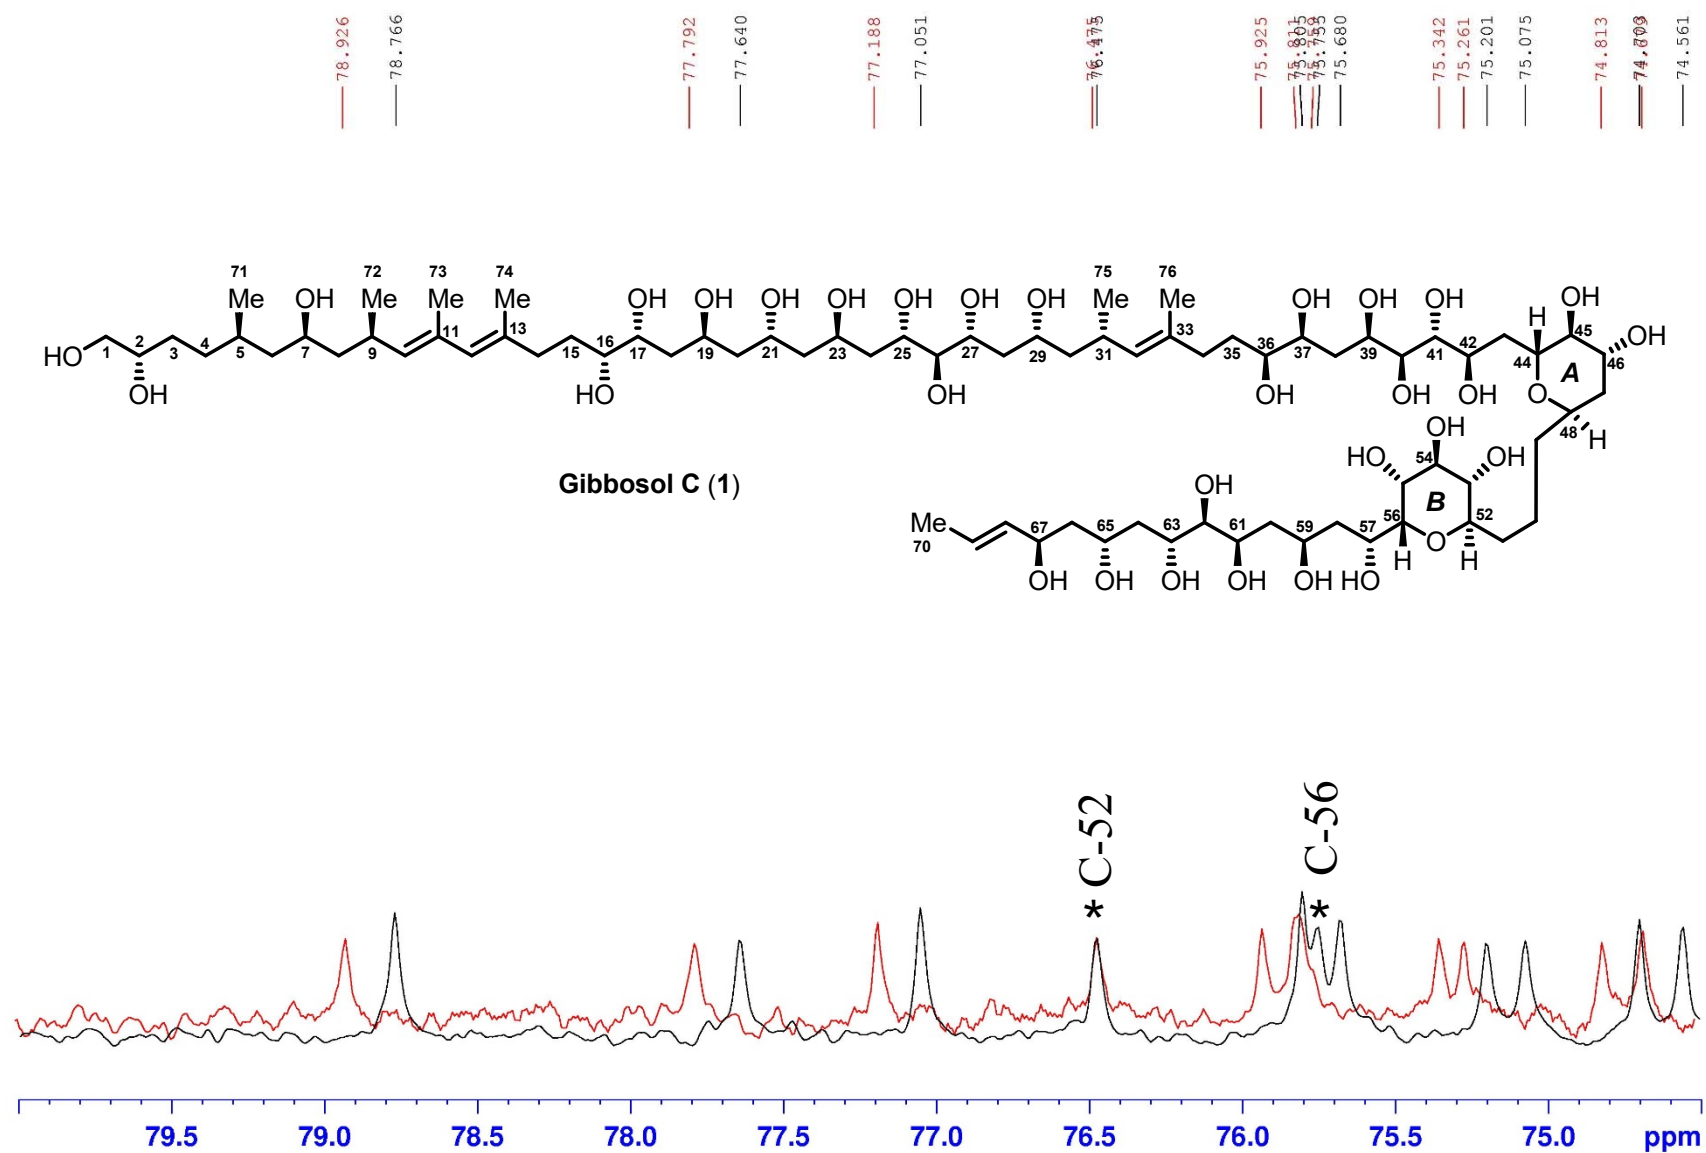

# Comparison of $^{13}\text{C}$ (175 MHz) NMR spectrum of compound **1** in $\text{CD}_3\text{OH}$ with that in $\text{CD}_3\text{OD}$

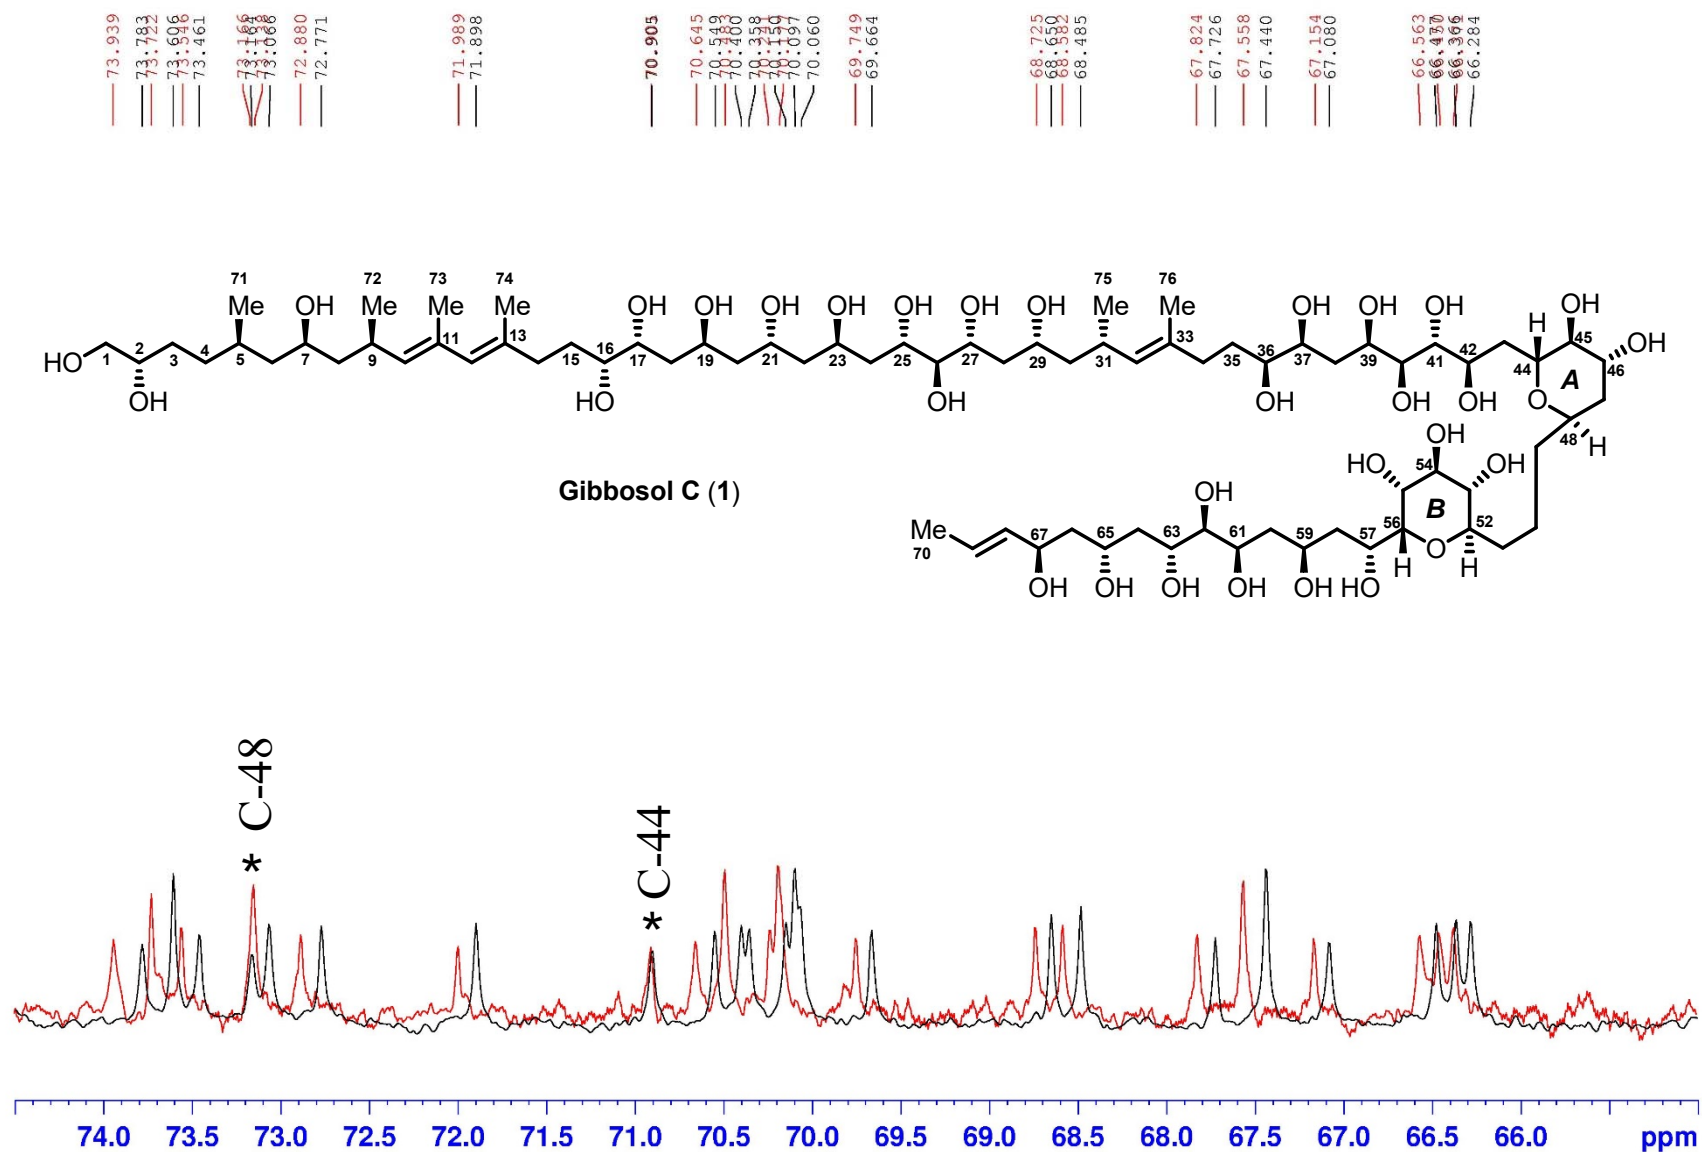

# LR-ESI-MS for the fragment **1a**

## Generic Display Report

### Analysis Info

Analysis Name Acquisition Date 2020-07-13 15:51:49  
Method D:\Data\amazon SL\MS\data\202007\jiangzhongping\_40-2-2-O3-1\_65\_01\_1955.d  
Operator 1955.m bruker  
Sample Name jiangzhongping\_40-2-2-O3-1 amazon SL  
Comment Instrument

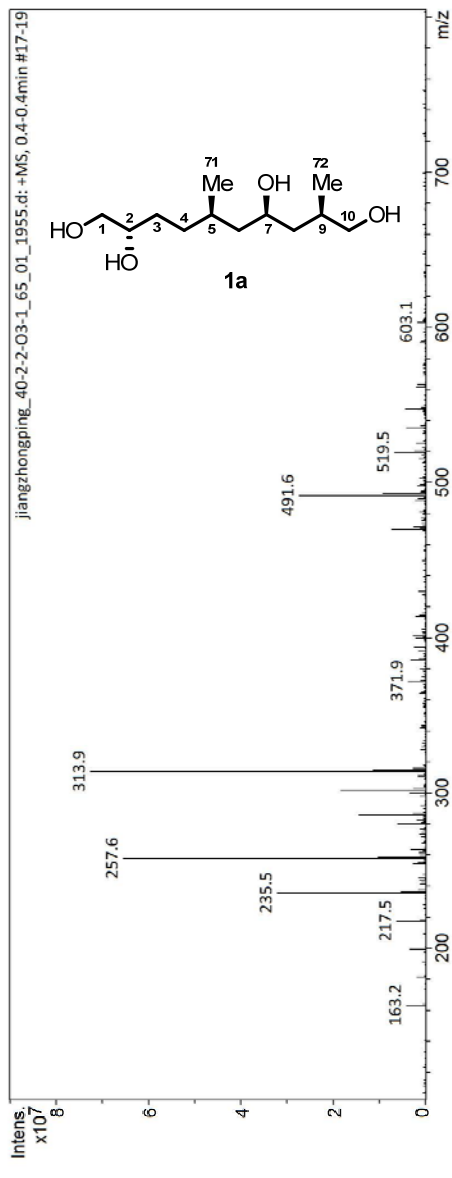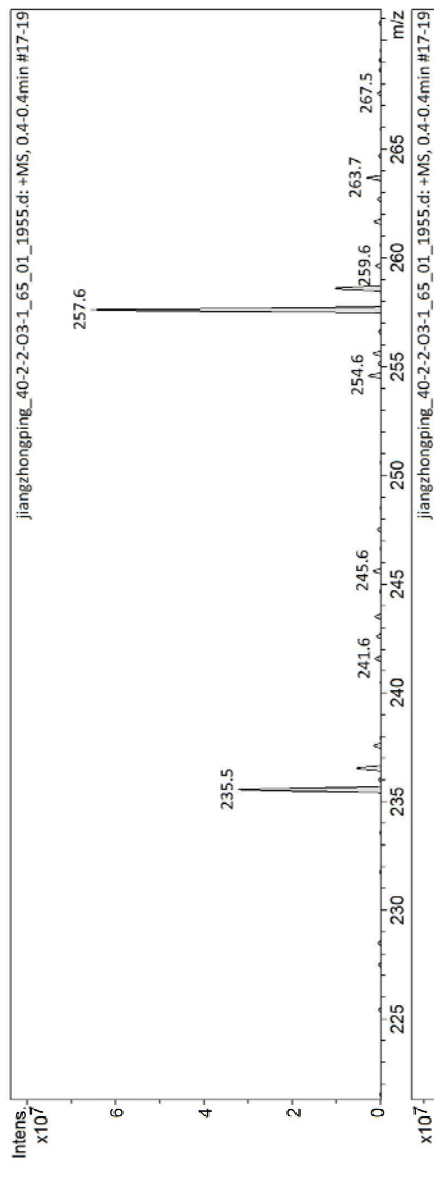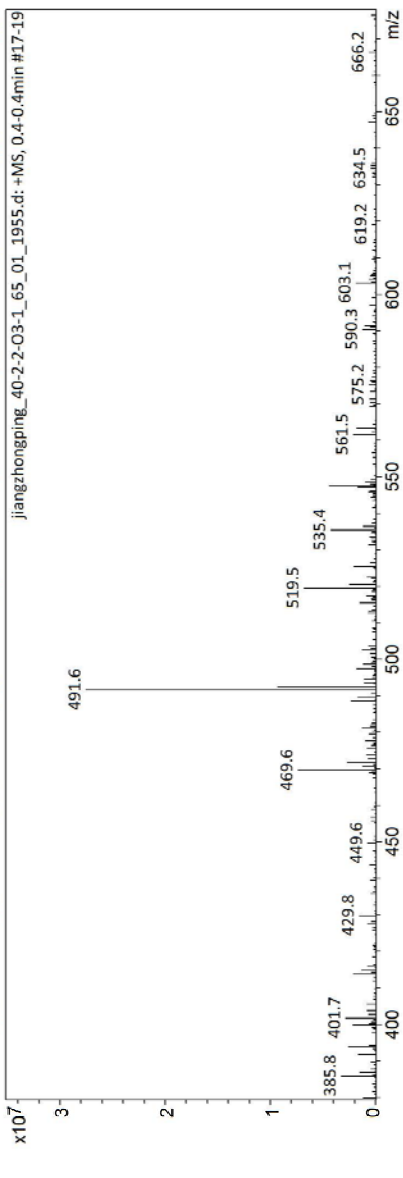

$^1\text{H}$  (700 MHz) NMR spectrum of the fragment **1a** in  $\text{CD}_3\text{OD}$

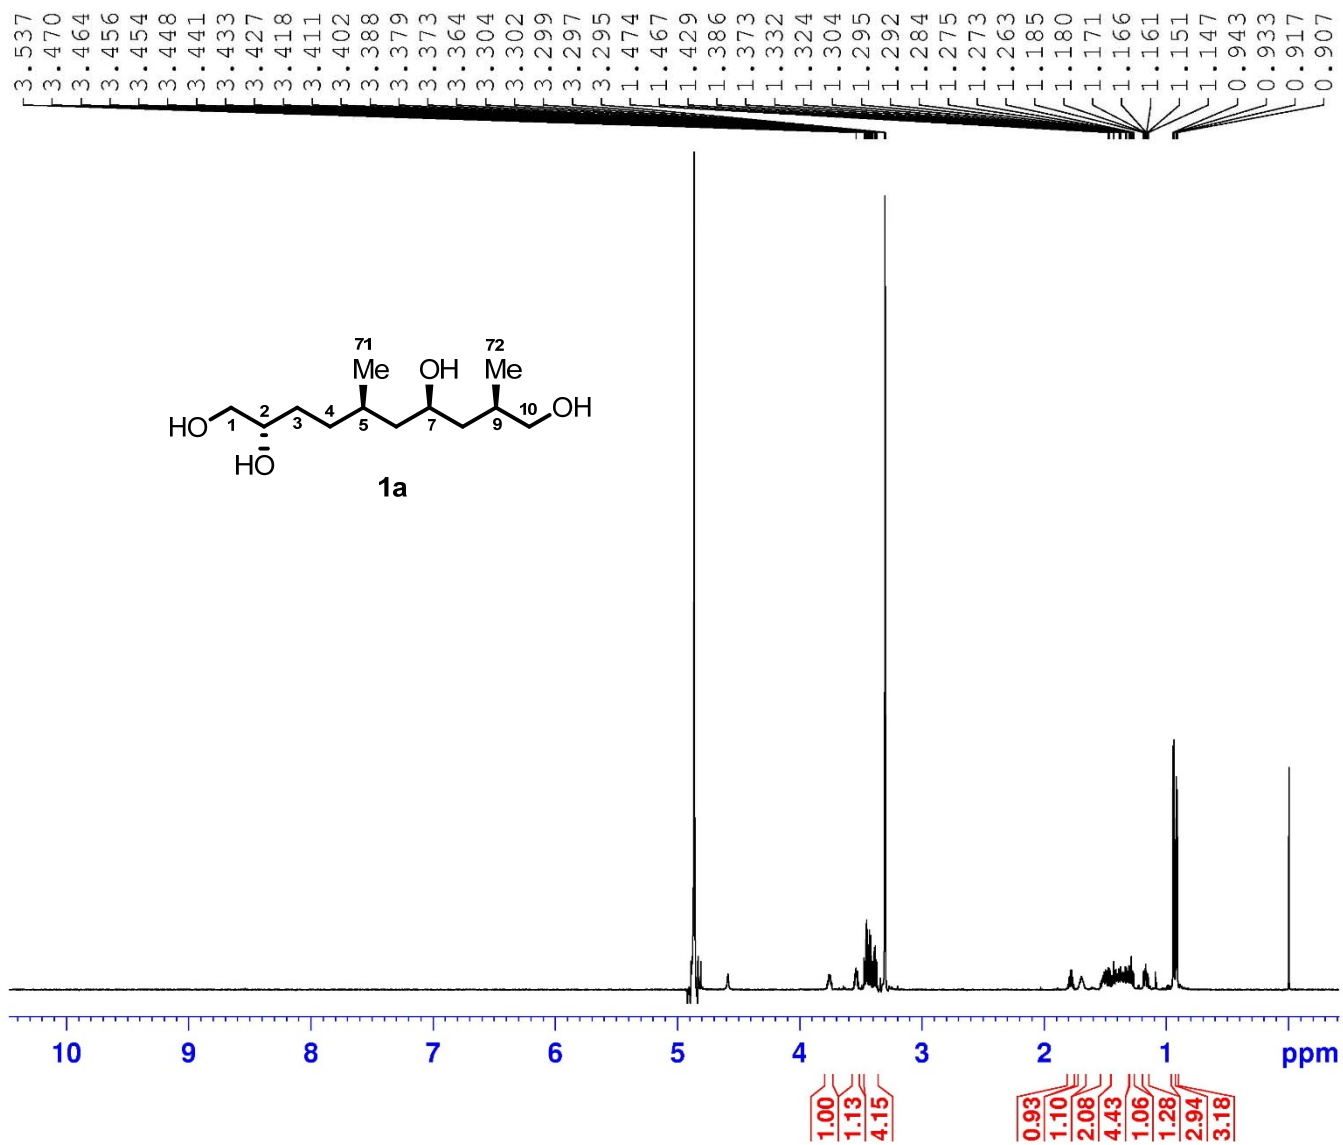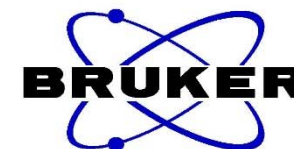

```

NAME      liwanshan-40-2-2-03-
EXPNO     12
PROCNO    1
Date_     20200306
Time      18.28 h
INSTRUM   spect
PROBHD    Z120187_0028 (
PULPROG   zg30
TD         65536
SOLVENT   MeOD
NS         3
DS         2
SWH       14097.744 Hz
FIDRES    0.430229 Hz
AQ         2.3243935 sec
RG         3.96
DW         35.467 usec
DE         10.00 usec
TE         298.0 K
D1         1.50000000 sec
TD0        1
SF01      700.1843236 MHz
NUC1       1H
P1         8.10 usec
SI         65536
SF         700.1800209 MHz
WDW        EM
SSB        0
LB         0.30 Hz
GB         0
PC         1.00
    
```

$^1\text{H}$  (700 MHz) NMR spectrum of the fragment **1a** in  $\text{CD}_3\text{OD}$

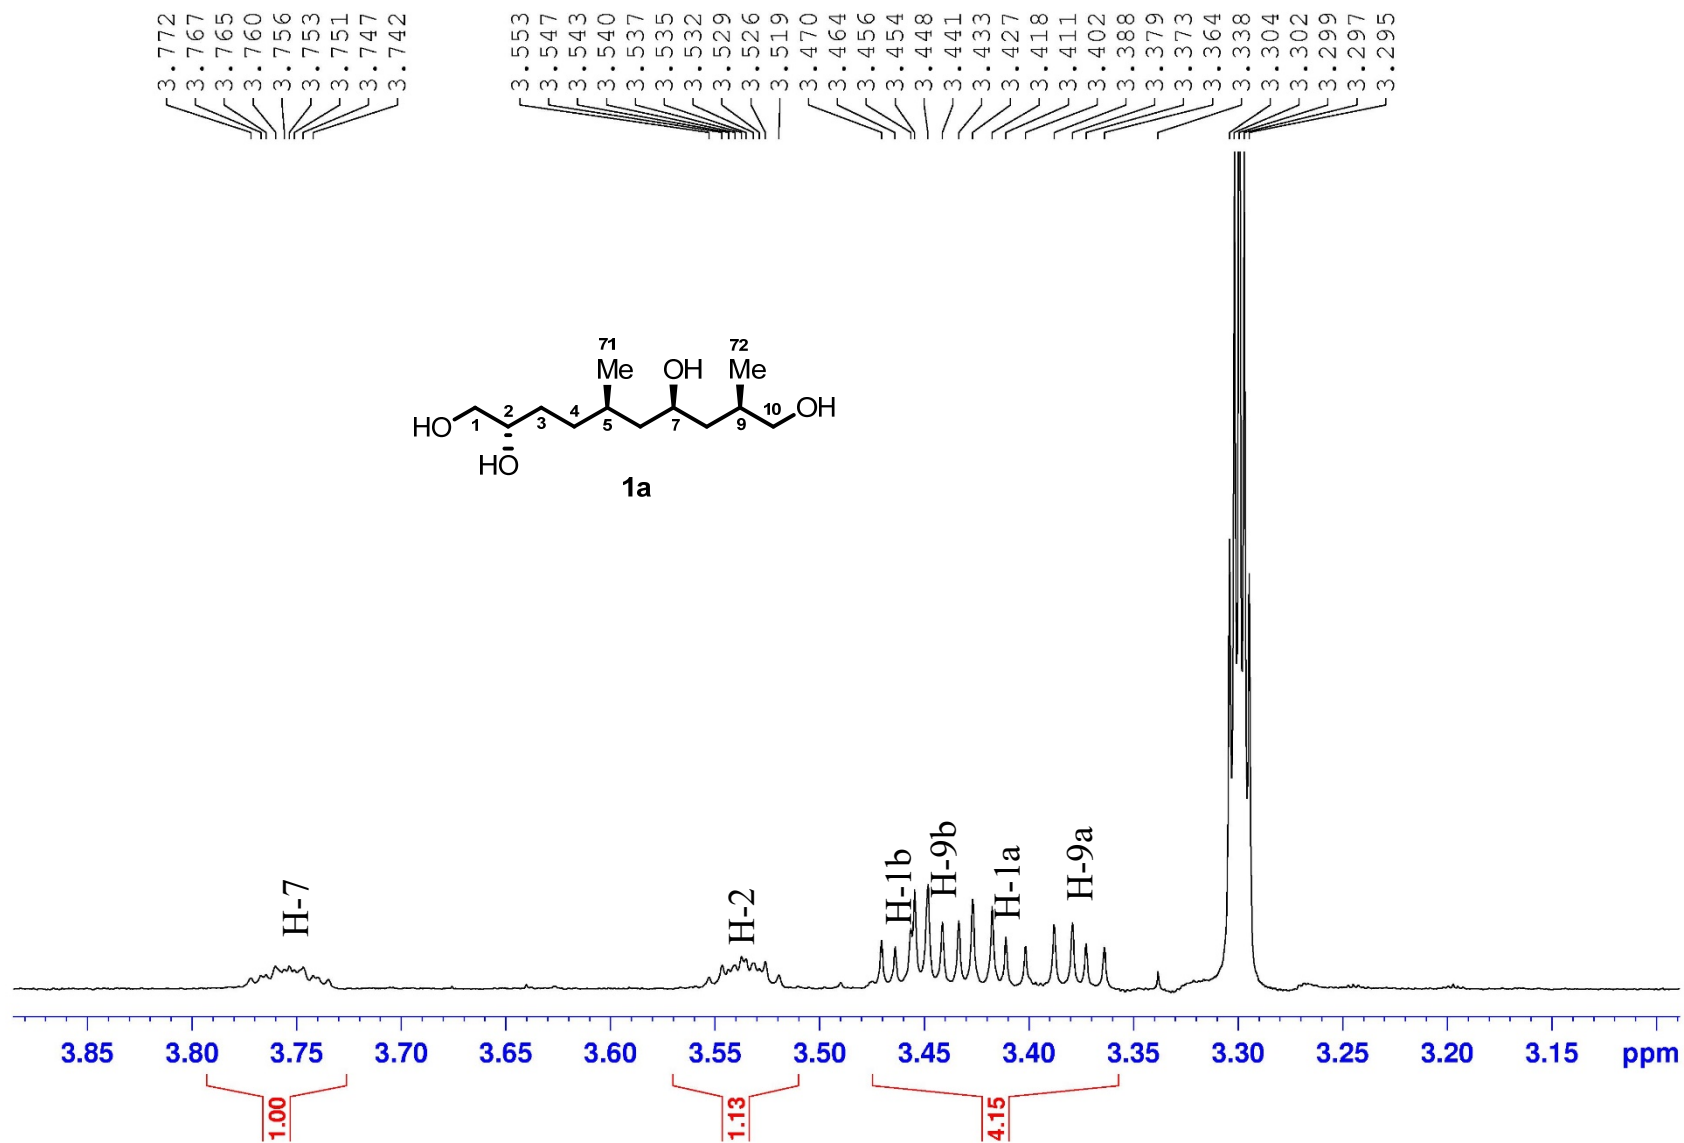

$^1\text{H}$  (700 MHz) NMR spectrum of the fragment **1a** in  $\text{CD}_3\text{OD}$

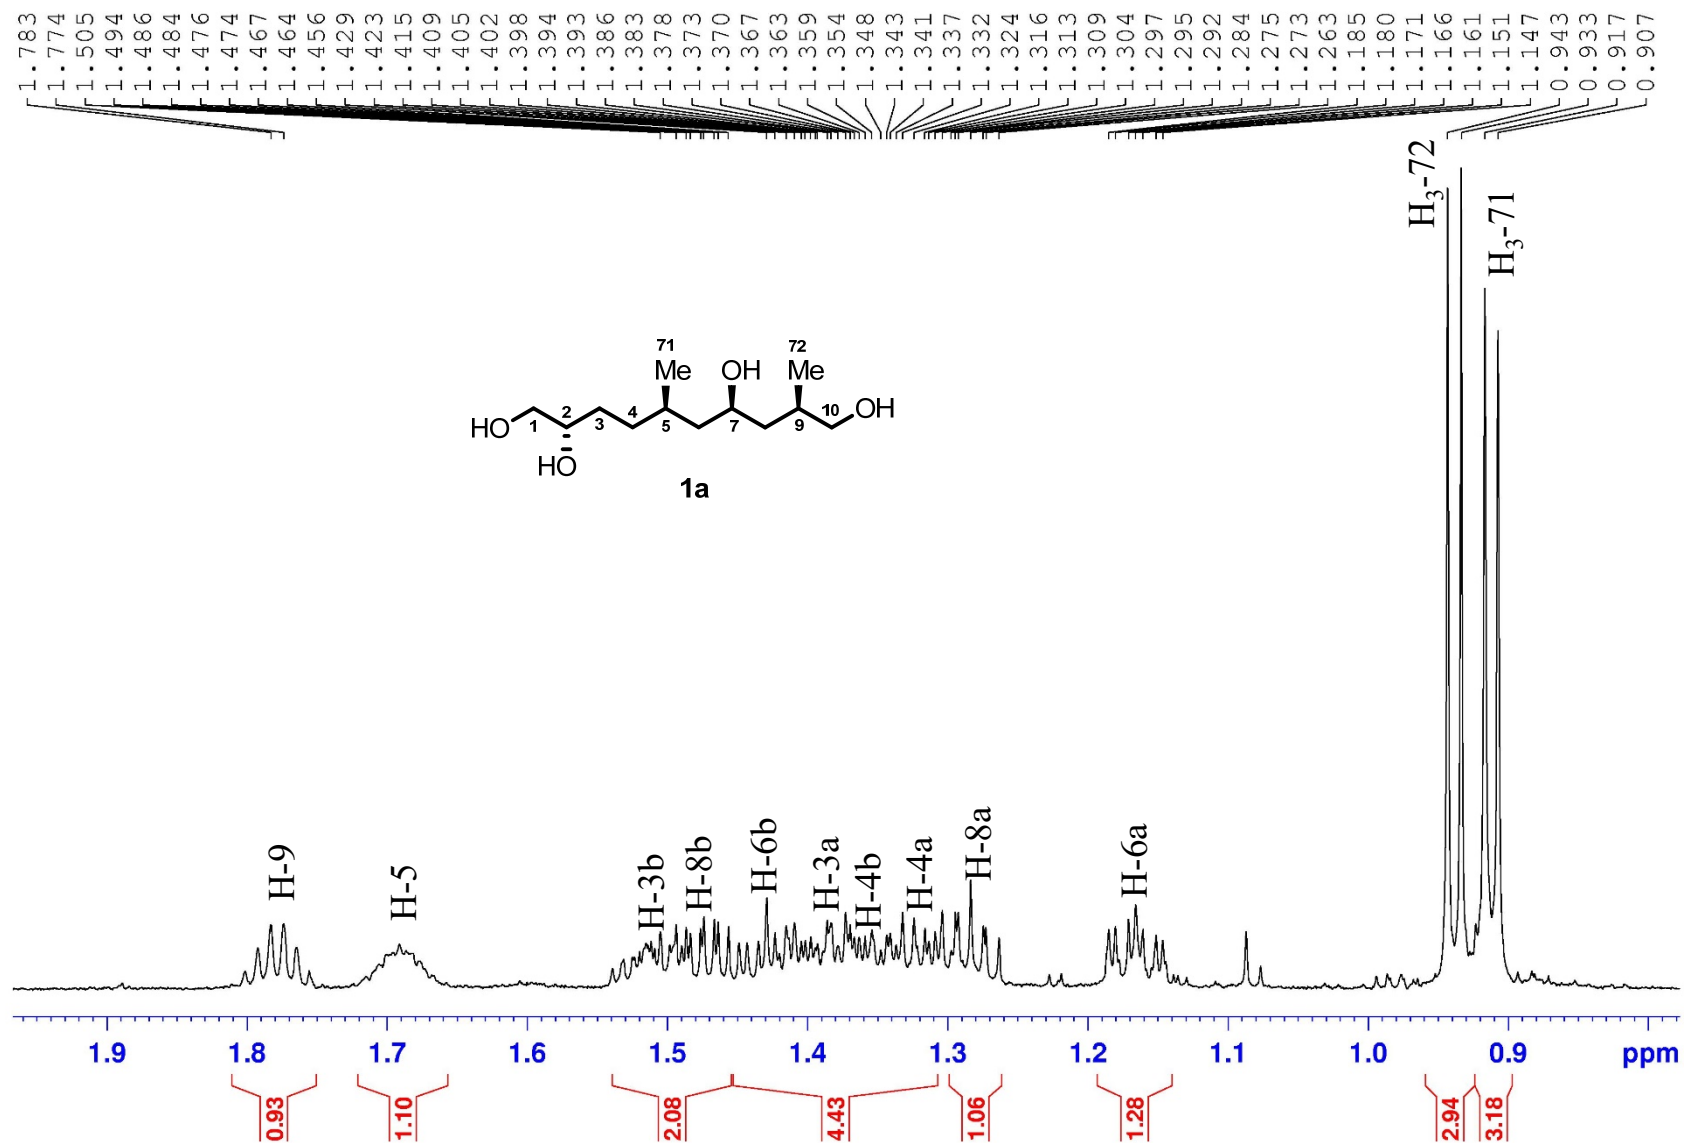

$^{13}\text{C}$  (175 MHz) NMR spectrum of the fragment **1a** in  $\text{CD}_3\text{OD}$

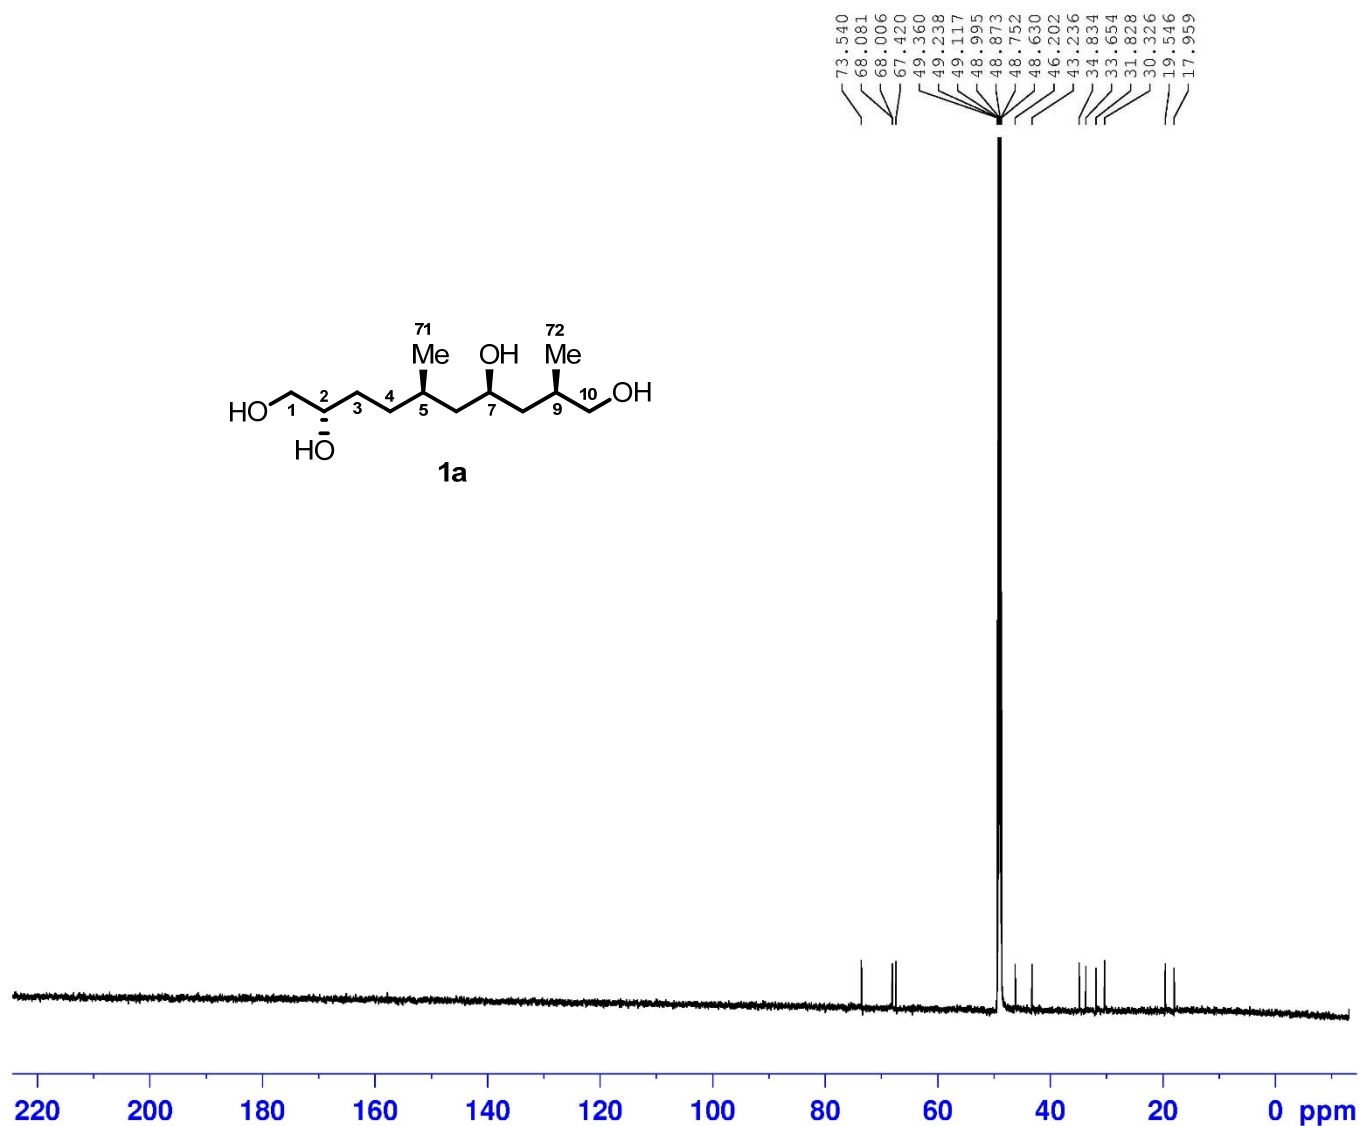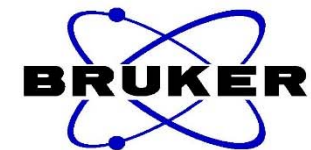

```

NAME      liwanshan-40-2-2-0
EXPNO     14
PROCNO    1
Date_     20200306
Time      22.40 h
INSTRUM   spect
PROBHD    Z120187_0028 (
PULPROG   zgpg30
TD         32768
SOLVENT   MeOD
NS         8000
DS         8
SWH        43859.648 Hz
FIDRES     2.676980 Hz
AQ         0.3736052 sec
RG         181.26
DW         11.400 use
DE         18.00 use
TE         298.0 K
D1         1.00000000 sec
D11        0.03000000 sec
TD0        1
SFO1       176.0797677 MHz
NUC1       13C
P1         11.90 use
SI         32768
SF         176.0601541 MHz
WDW        EM
SSB        0
LB         3.00 Hz
GB         0
PC         1.40
    
```

$^{13}\text{C}$  (175 MHz) NMR spectrum of the fragment **1a** in  $\text{CD}_3\text{OD}$

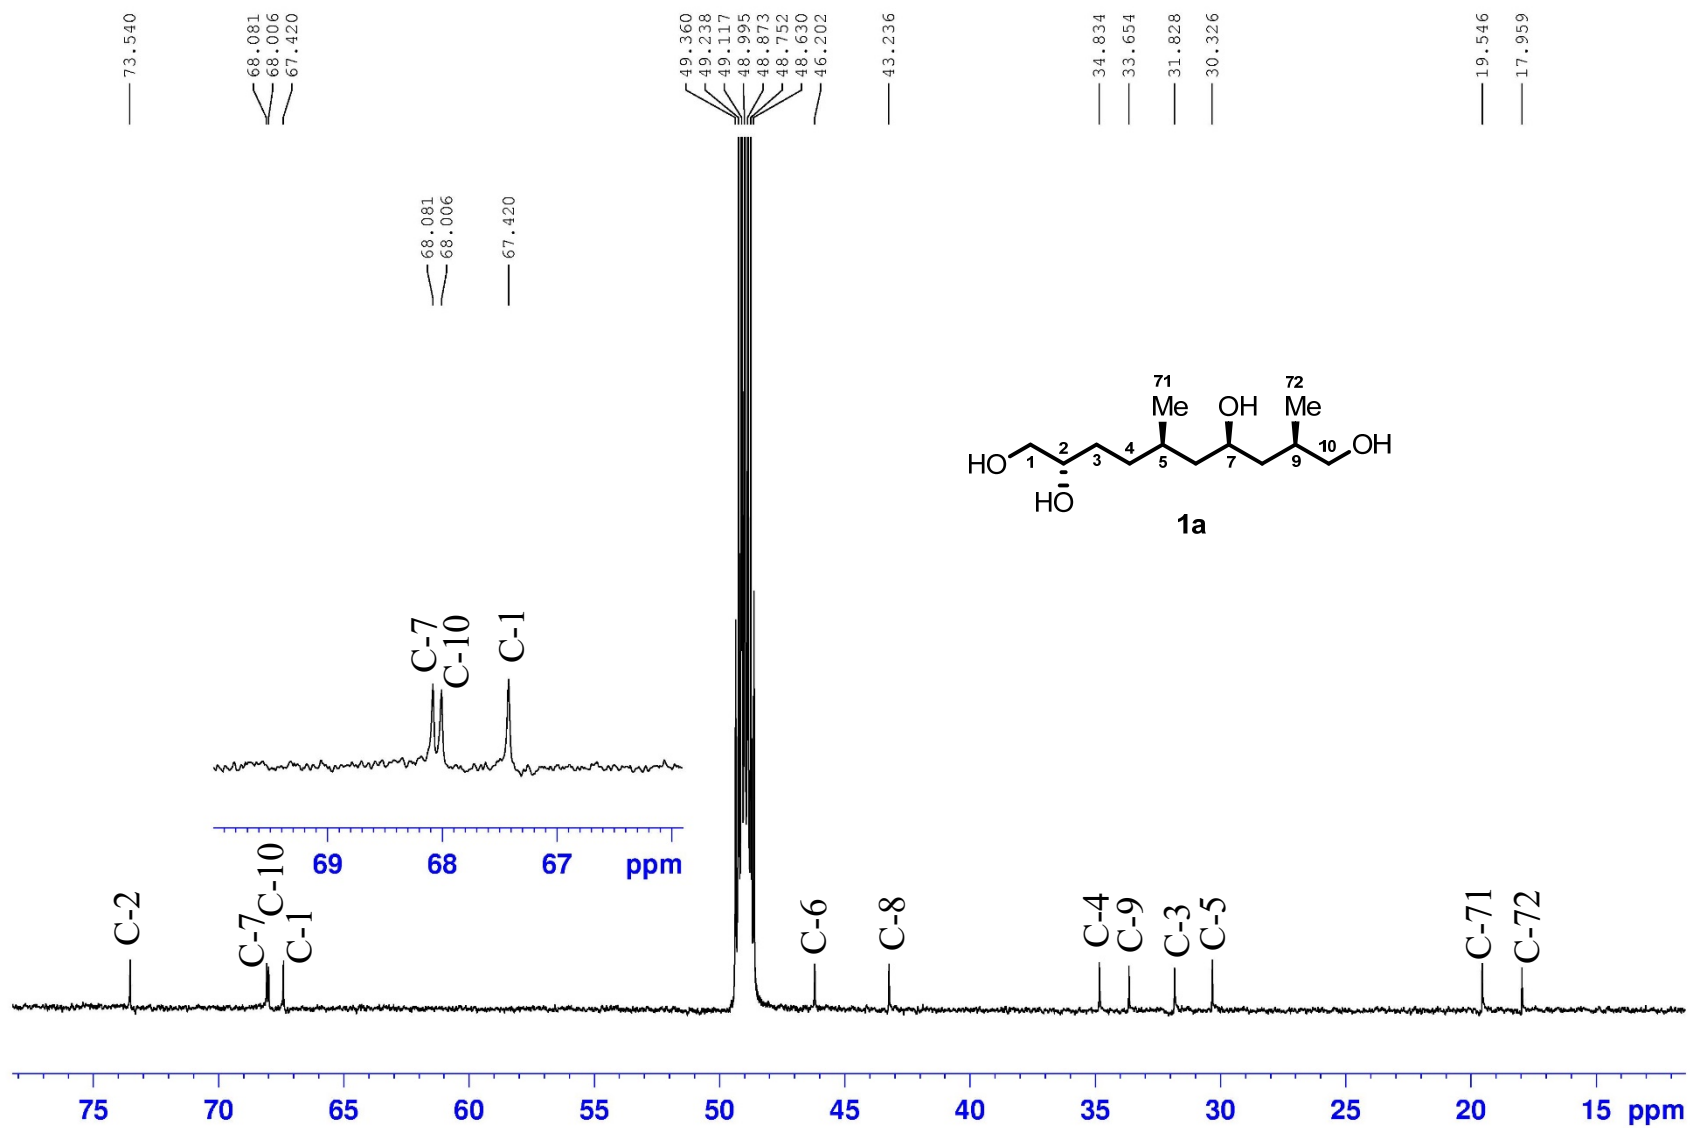



# DEPT135 (175 MHz) spectrum of the fragment **1a** in CD<sub>3</sub>OD

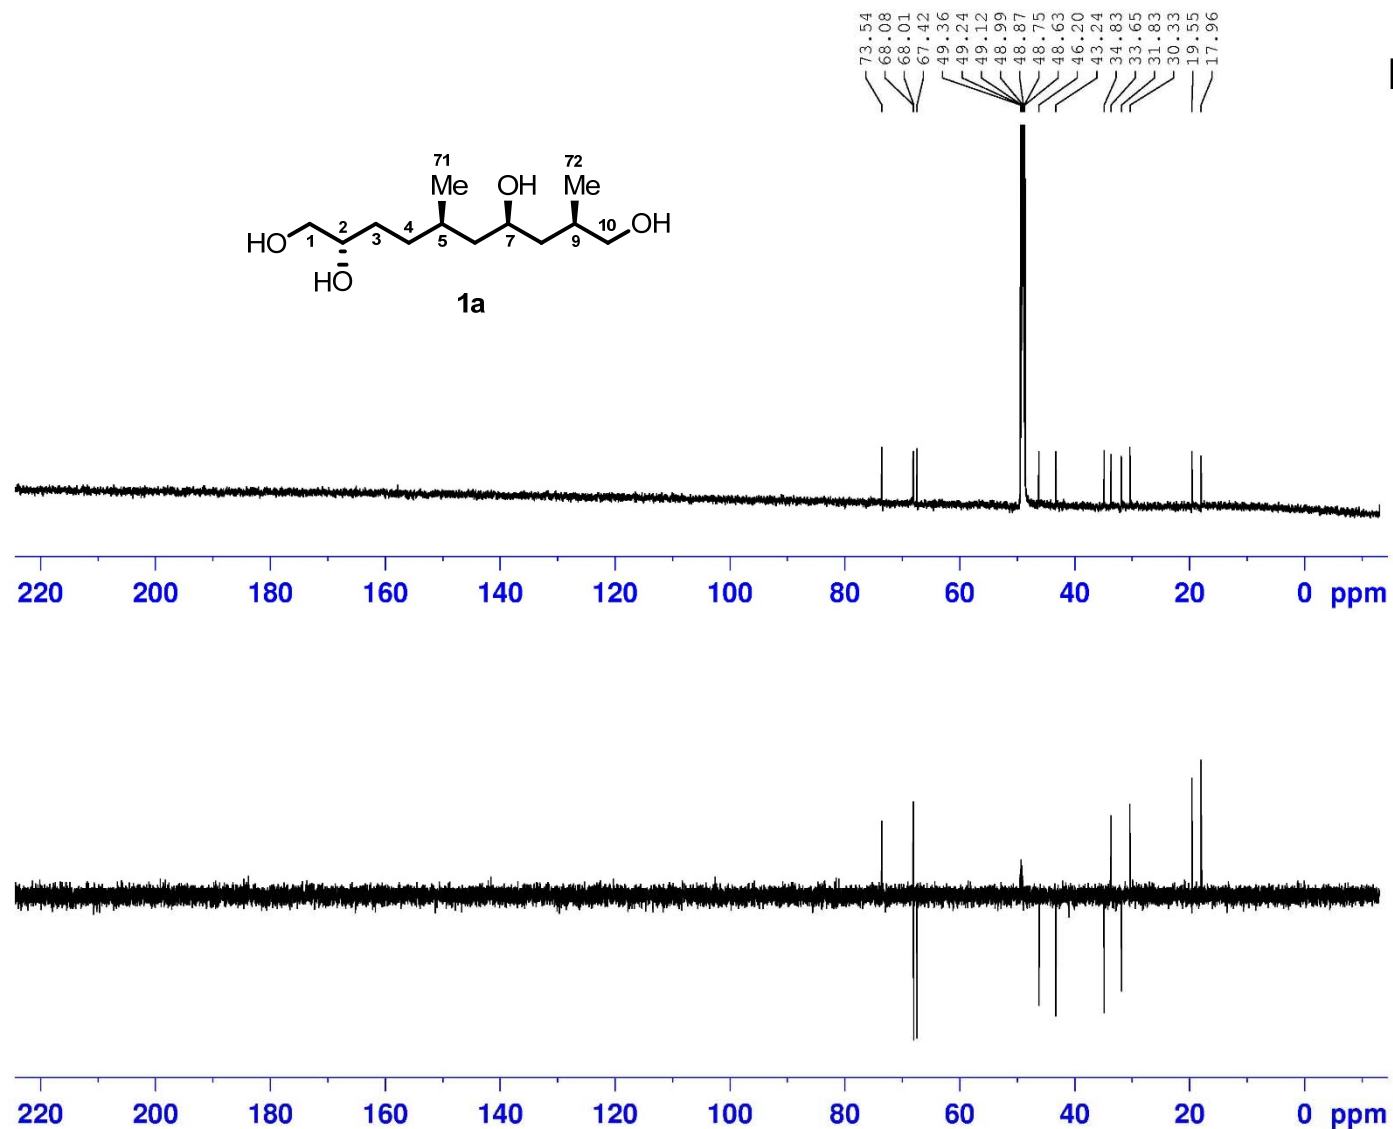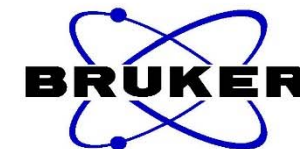

```

NAME      liwanshan-40-2-2-
EXPNO     19
PROCNO    1
Date_     20200312
Time      12.34 h
INSTRUM   spect
PROBHD    Z120187_0028 (
PULPROG   deptspl35
TD         32768
SOLVENT   MeOD
NS         512
DS         8
SWH        43859.648 H:
FIDRES     2.676980 H:
AQ         0.3736052 s:
RG         181.26
DW         11.400 u:
DE         18.00 u:
TE         298.0 K
CNST2     145.0000000
D1         1.00000000 s:
D2         0.00344828 s:
D12        0.00002000 s:
TD0        1
SF01      176.0797677 MHz
NUC1       13C
P1         11.90 u:
P13        2000.00 u:
SI         32768
SF         176.0601547 MHz
WDW        EM
SSB        0
LB         1.00 H:
GB         0
PC         1.40
    
```

# DEPT135 (175 MHz) spectrum of the fragment **1a** in CD<sub>3</sub>OD

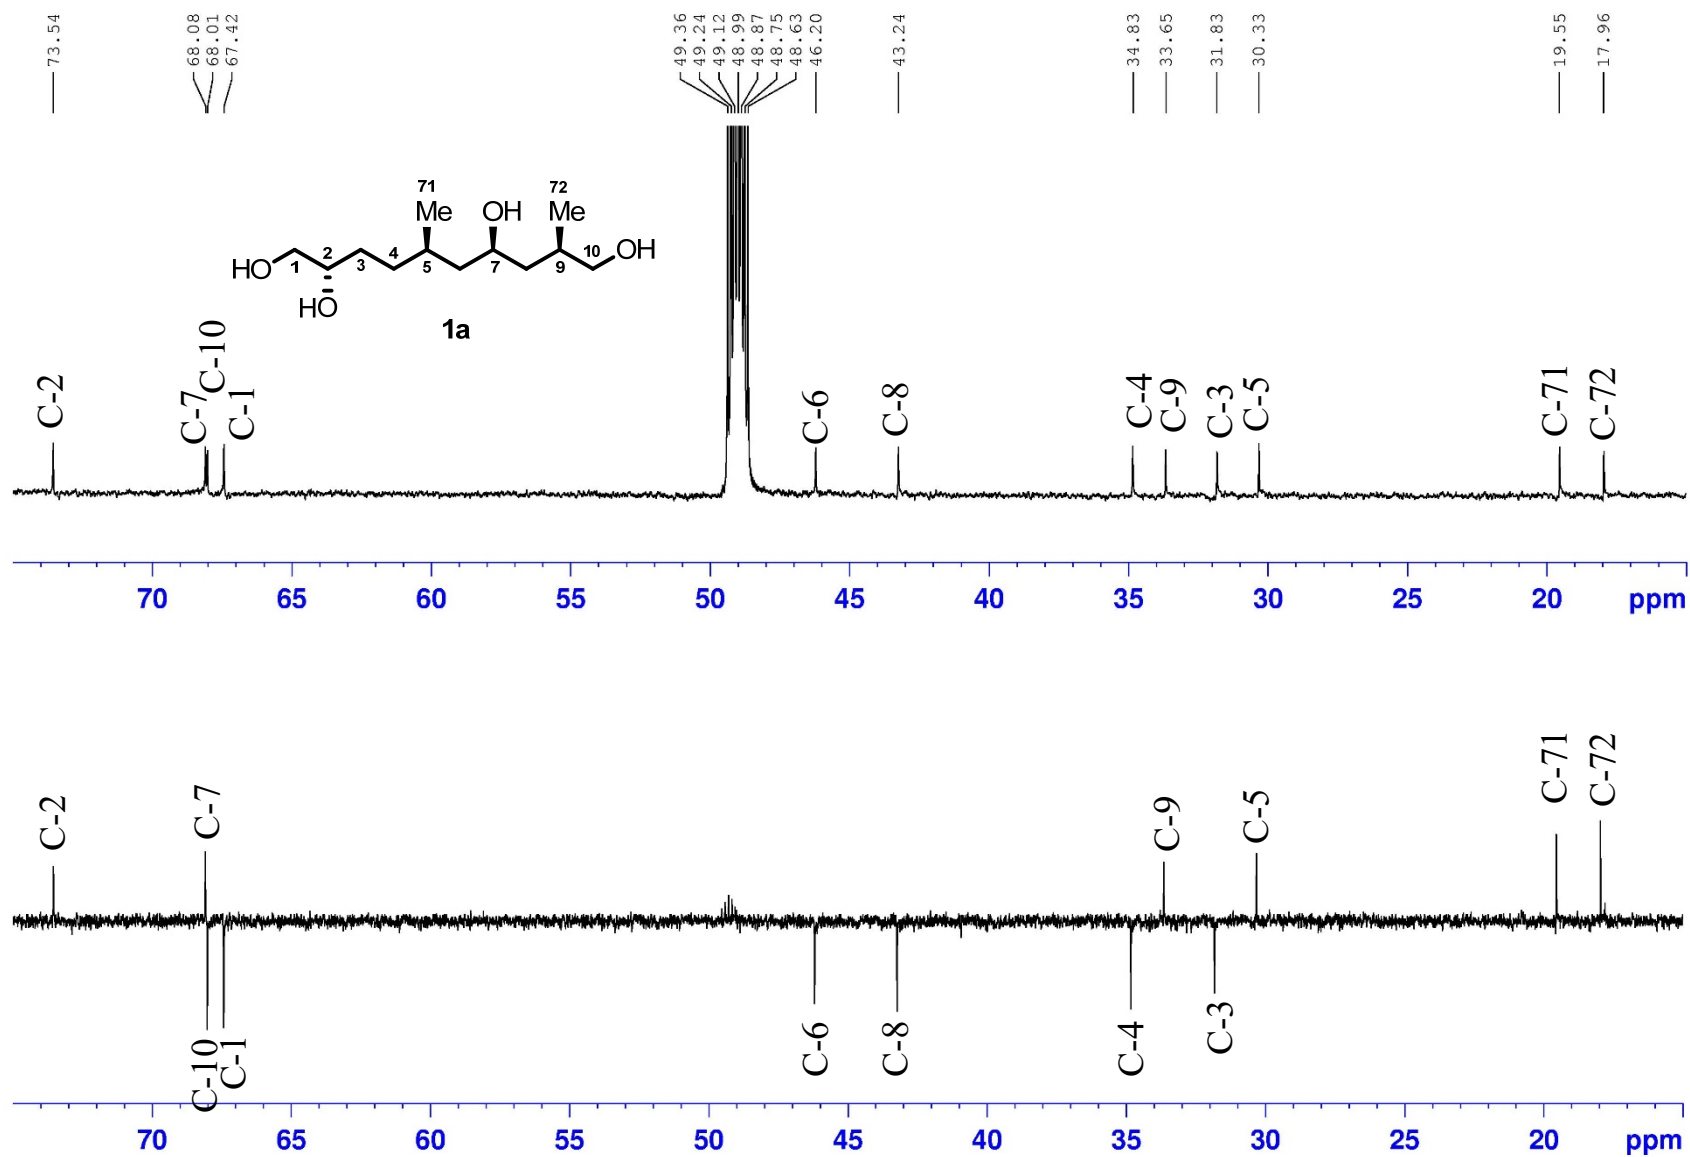

# $^1\text{H}$ - $^1\text{H}$ COSY (700 MHz) spectrum of the fragment **1a** in $\text{CD}_3\text{OD}$

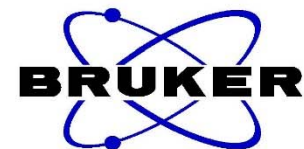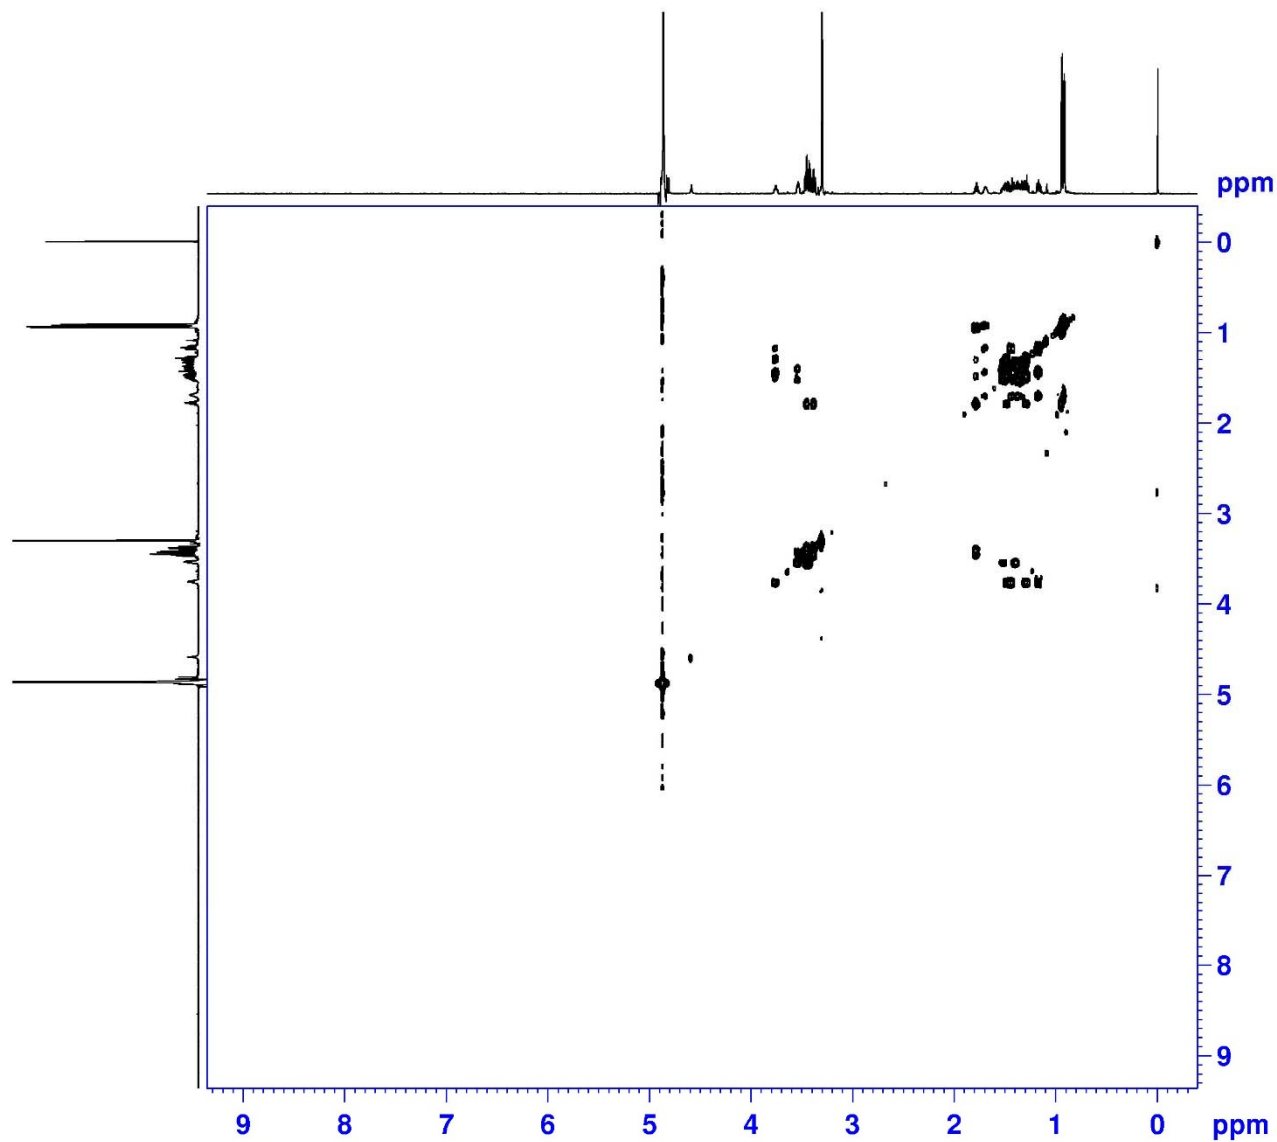

```
NAME      liwanshan-40-2-2-03-1
EXPNO     16
PROCNO    1
Date_     20200312
Time      8.54 h
INSTRUM   spect
PROBHD    z120187_0028 (
PULPROG   cosygpppqf
TD        2048
SOLVENT   MeOD
NS        24
DS        16
SWH       4606.879 Hz
FIDRES    4.498906 Hz
AQ        0.2223263 sec
RG        57.16
DW        108.533 usec
DE        10.00 usec
TE        298.0 K
D0        0.00000300 sec
D1        1.00000000 sec
D11       0.03000000 sec
D12       0.00002000 sec
D13       0.00000400 sec
D16       0.00020000 sec
IN0       0.00021700 sec
ND0       1
TD        128
SFO1     700.182 MHz
FIDRES    36.002304 Hz
SW        6.582 ppm
FnMODE    QF
SI        2048
SF        700.1800190 MHz
WDW       QSINE
SSB       0
LB        0.00 Hz
GB        0
PC        1.40
SI        2048
MC2      QF
SF        700.1800180 MHz
WDW       QSINE
SSB       0
LB        0.00 Hz
GB        0
```

$^1\text{H}$ - $^1\text{H}$  COSY (700 MHz) spectrum of the fragment **1a** in  $\text{CD}_3\text{OD}$

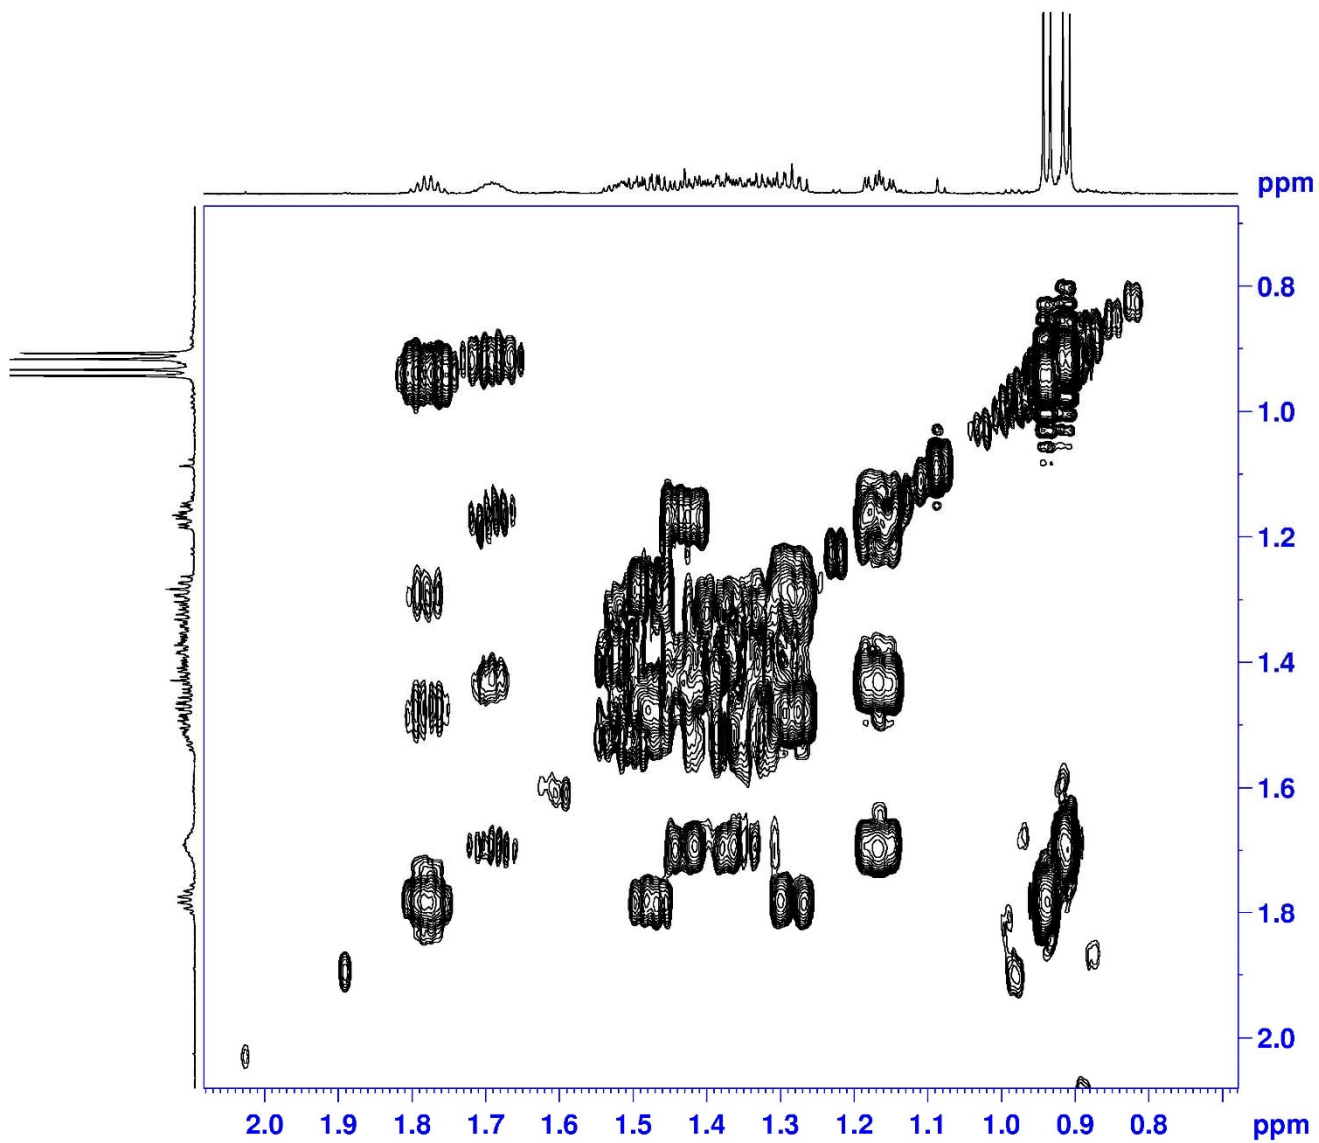

$^1\text{H}$ - $^1\text{H}$  COSY (700 MHz) spectrum of the fragment **1a** in  $\text{CD}_3\text{OD}$

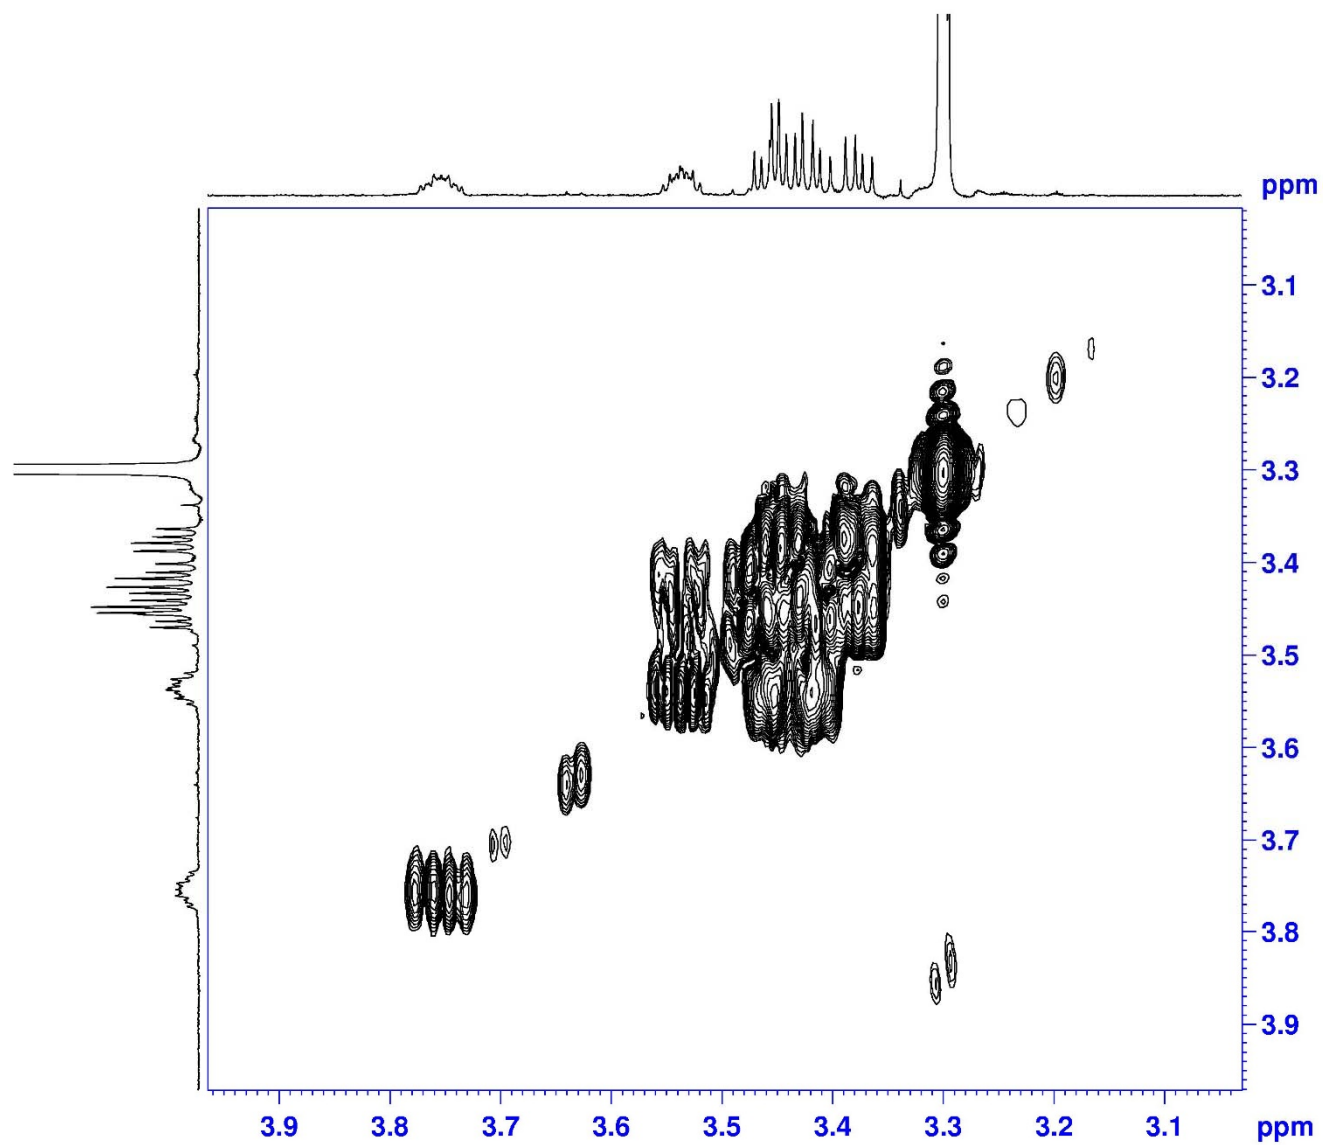

$^1\text{H}$ - $^1\text{H}$  COSY (700 MHz) spectrum of the fragment **1a** in  $\text{CD}_3\text{OD}$

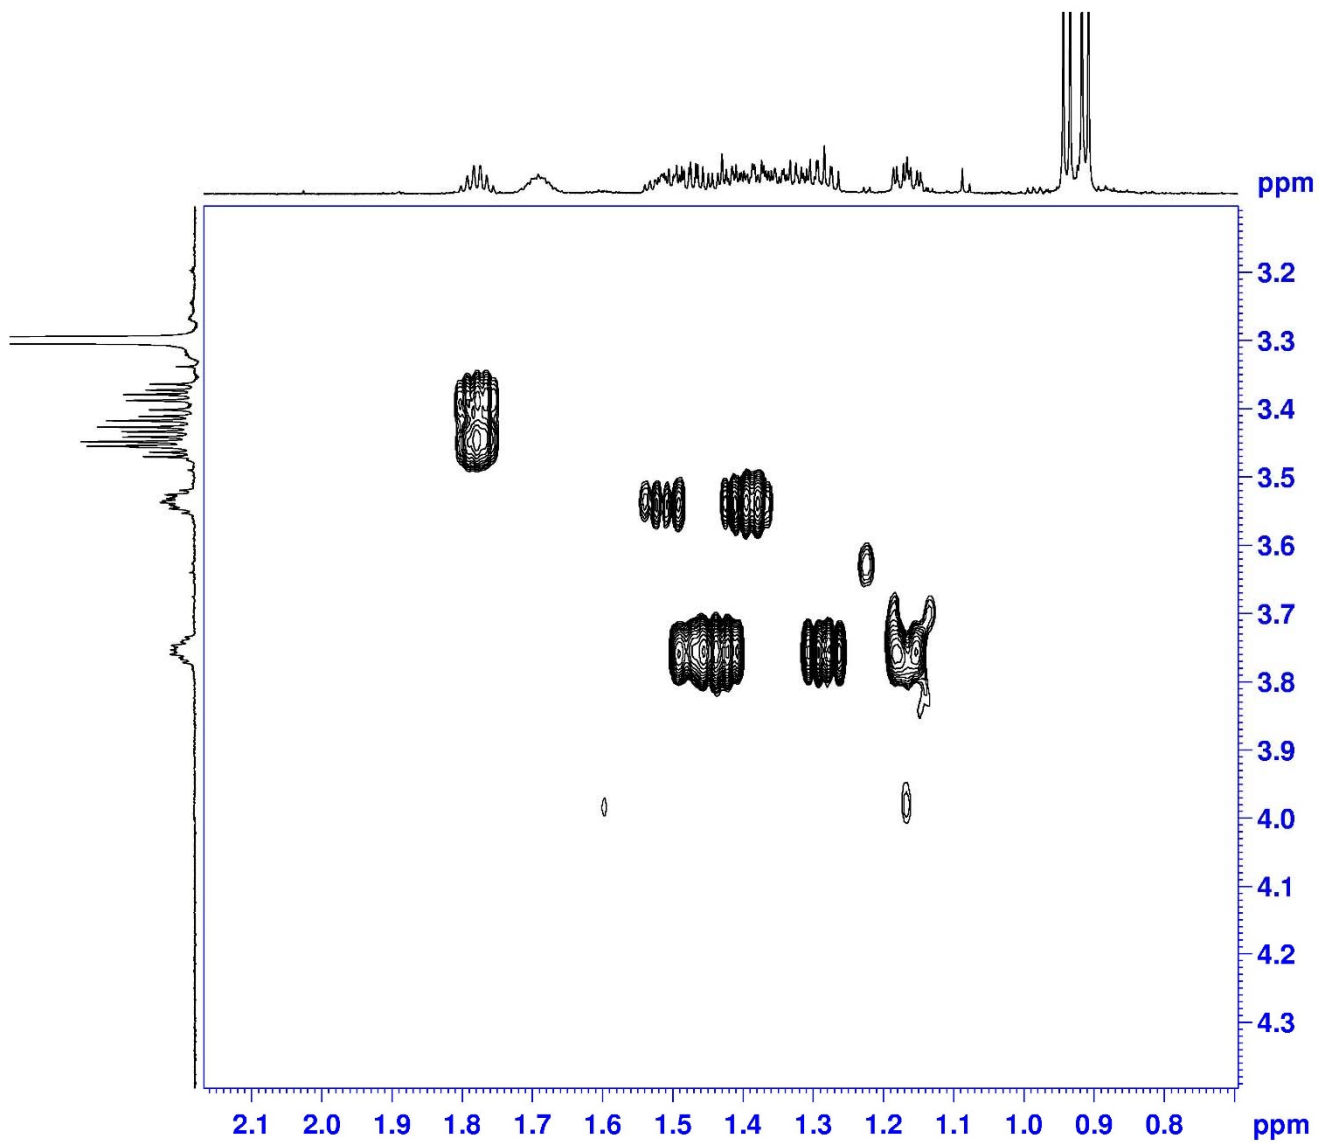

# HSQC (700 MHz) spectrum of the fragment **1a** in CD<sub>3</sub>OD

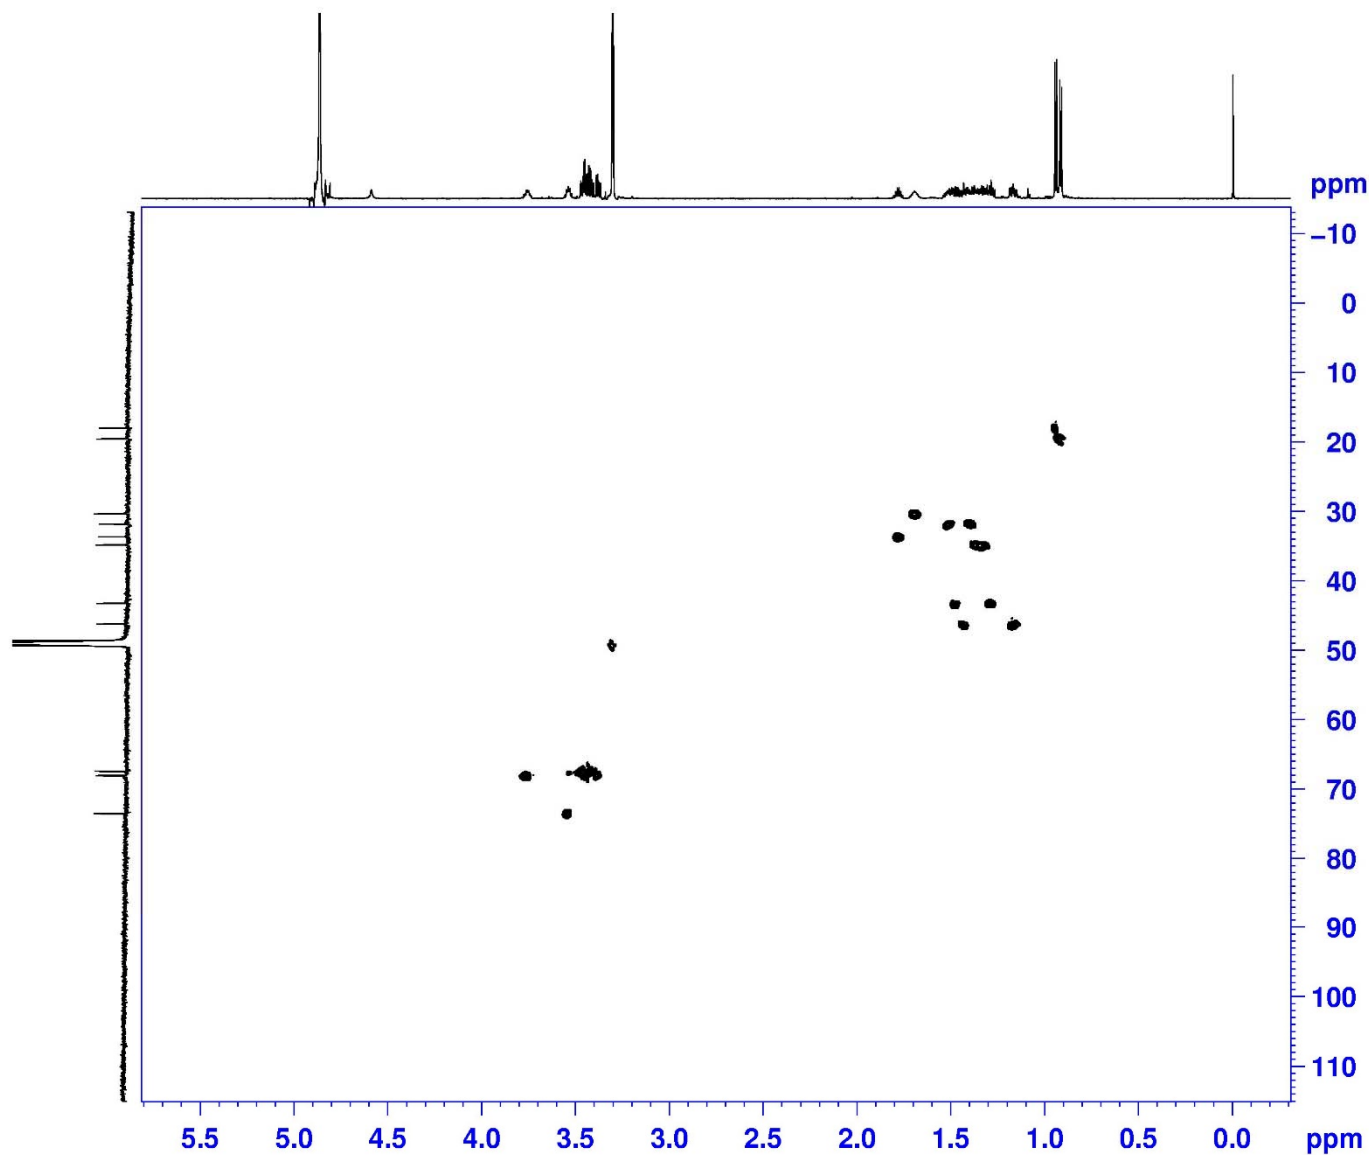

|         |                   |
|---------|-------------------|
| NAME    | liwanshan-40-2-2- |
| EXPNO   | 18                |
| PROCNO  | 1                 |
| Date_   | 20200312          |
| Time    | 11.21 h           |
| INSTRUM | spect             |
| PROBHD  | Z120187_0028 (    |
| PULPROG | hsqcetdgp         |
| TD      | 2048              |
| SOLVENT | MeOD              |
| NS      | 24                |
| DS      | 16                |
| SWH     | 5617.978 Hz       |
| FIDRES  | 5.486306 Hz       |
| AQ      | 0.1823220 se      |
| RG      | 181.26            |
| DW      | 89.000 us         |
| DE      | 10.00 us          |
| TE      | 298.0 K           |
| CNST2   | 145.0000000       |
| D0      | 0.00000300 se     |
| D1      | 1.00000000 se     |
| D4      | 0.00172414 se     |
| D11     | 0.03000000 se     |
| D13     | 0.00000400 se     |
| D16     | 0.00020000 se     |
| D21     | 0.00345000 se     |
| IN0     | 0.00002870 se     |
| ND0     | 2                 |
| TD      | 128               |
| SFO1    | 176.0679 MH       |
| FIDRES  | 136.106277 Hz     |
| SW      | 98.948 ppi        |
| FnMODE  | Echo-Antiecho     |
| SI      | 1024              |
| SF      | 700.1800160 MH    |
| WDW     | QSINE             |
| SSB     | 2                 |
| LB      | 0.00 Hz           |
| GB      | 0                 |
| PC      | 1.40              |
| SI      | 1024              |
| MC2     | echo-antiecho     |
| SF      | 176.0601541 MH    |
| WDW     | QSINE             |
| SSB     | 2                 |
| LB      | 0.00 Hz           |
| GB      | 0                 |

HSQC (700 MHz) spectrum of the fragment **1a** in CD<sub>3</sub>OD

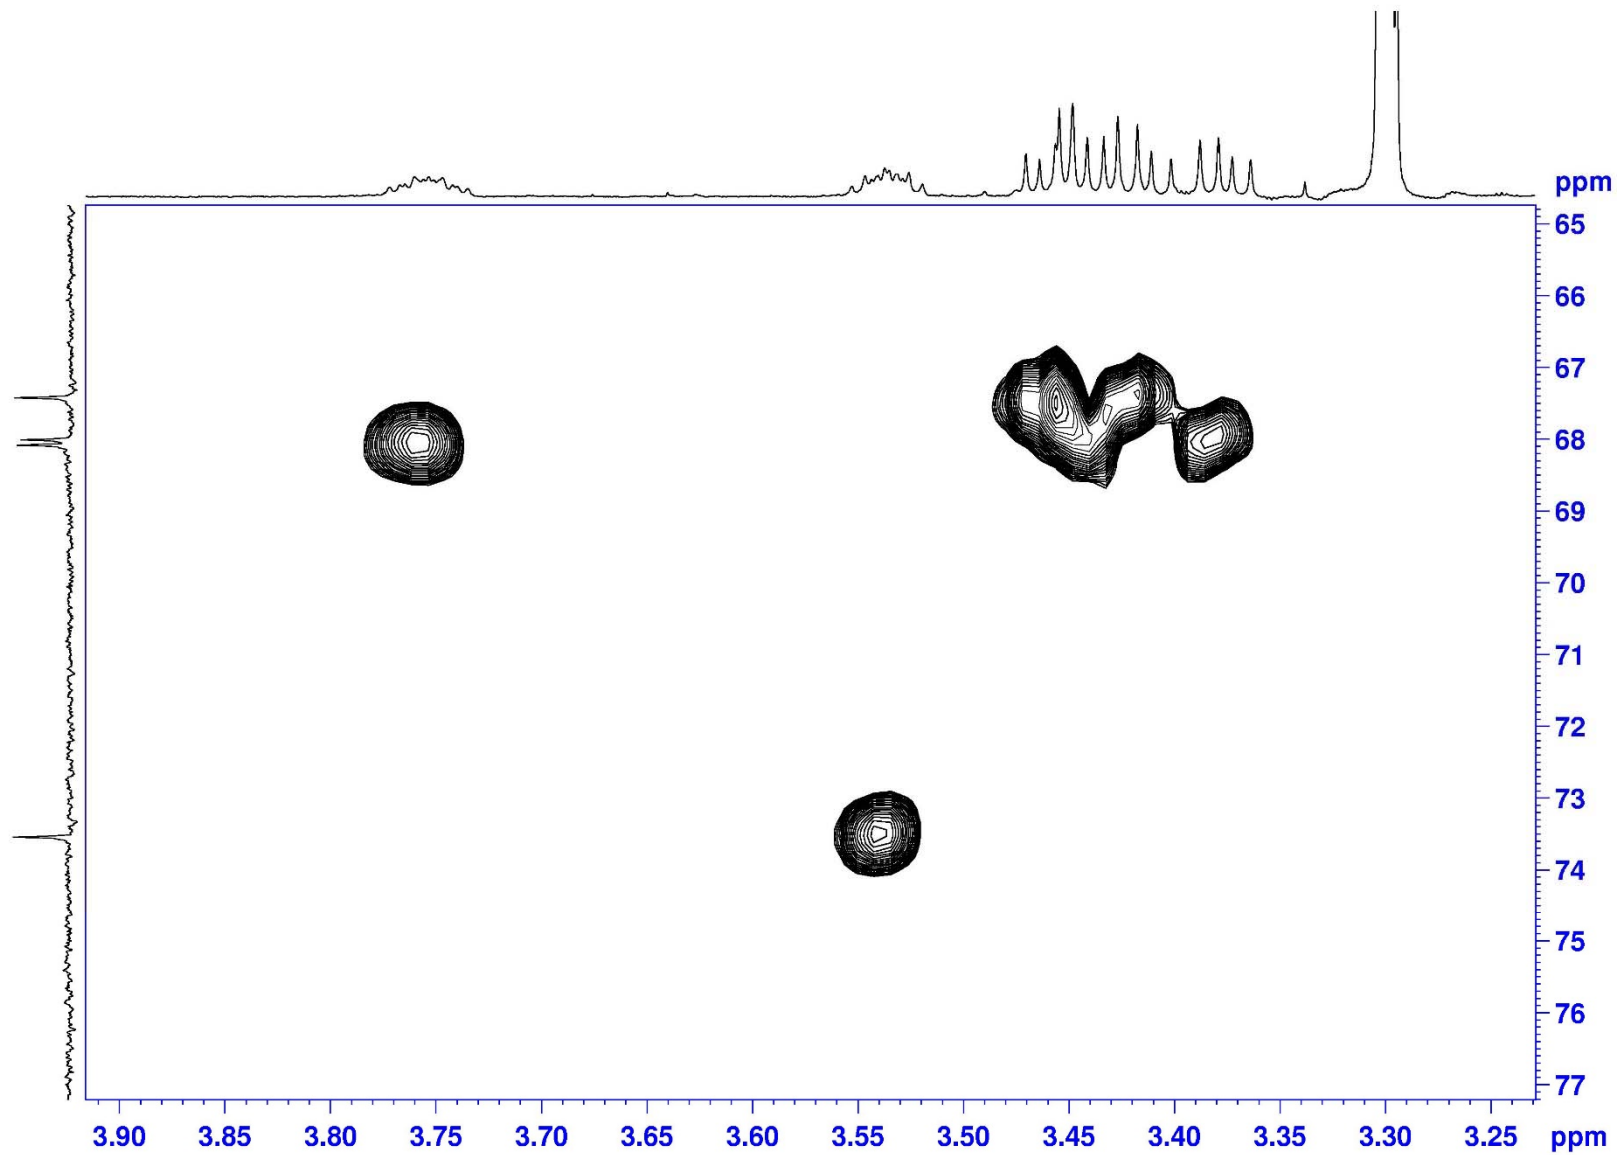



# HSQC (700 MHz) spectrum of the fragment **1a** in CD<sub>3</sub>OD

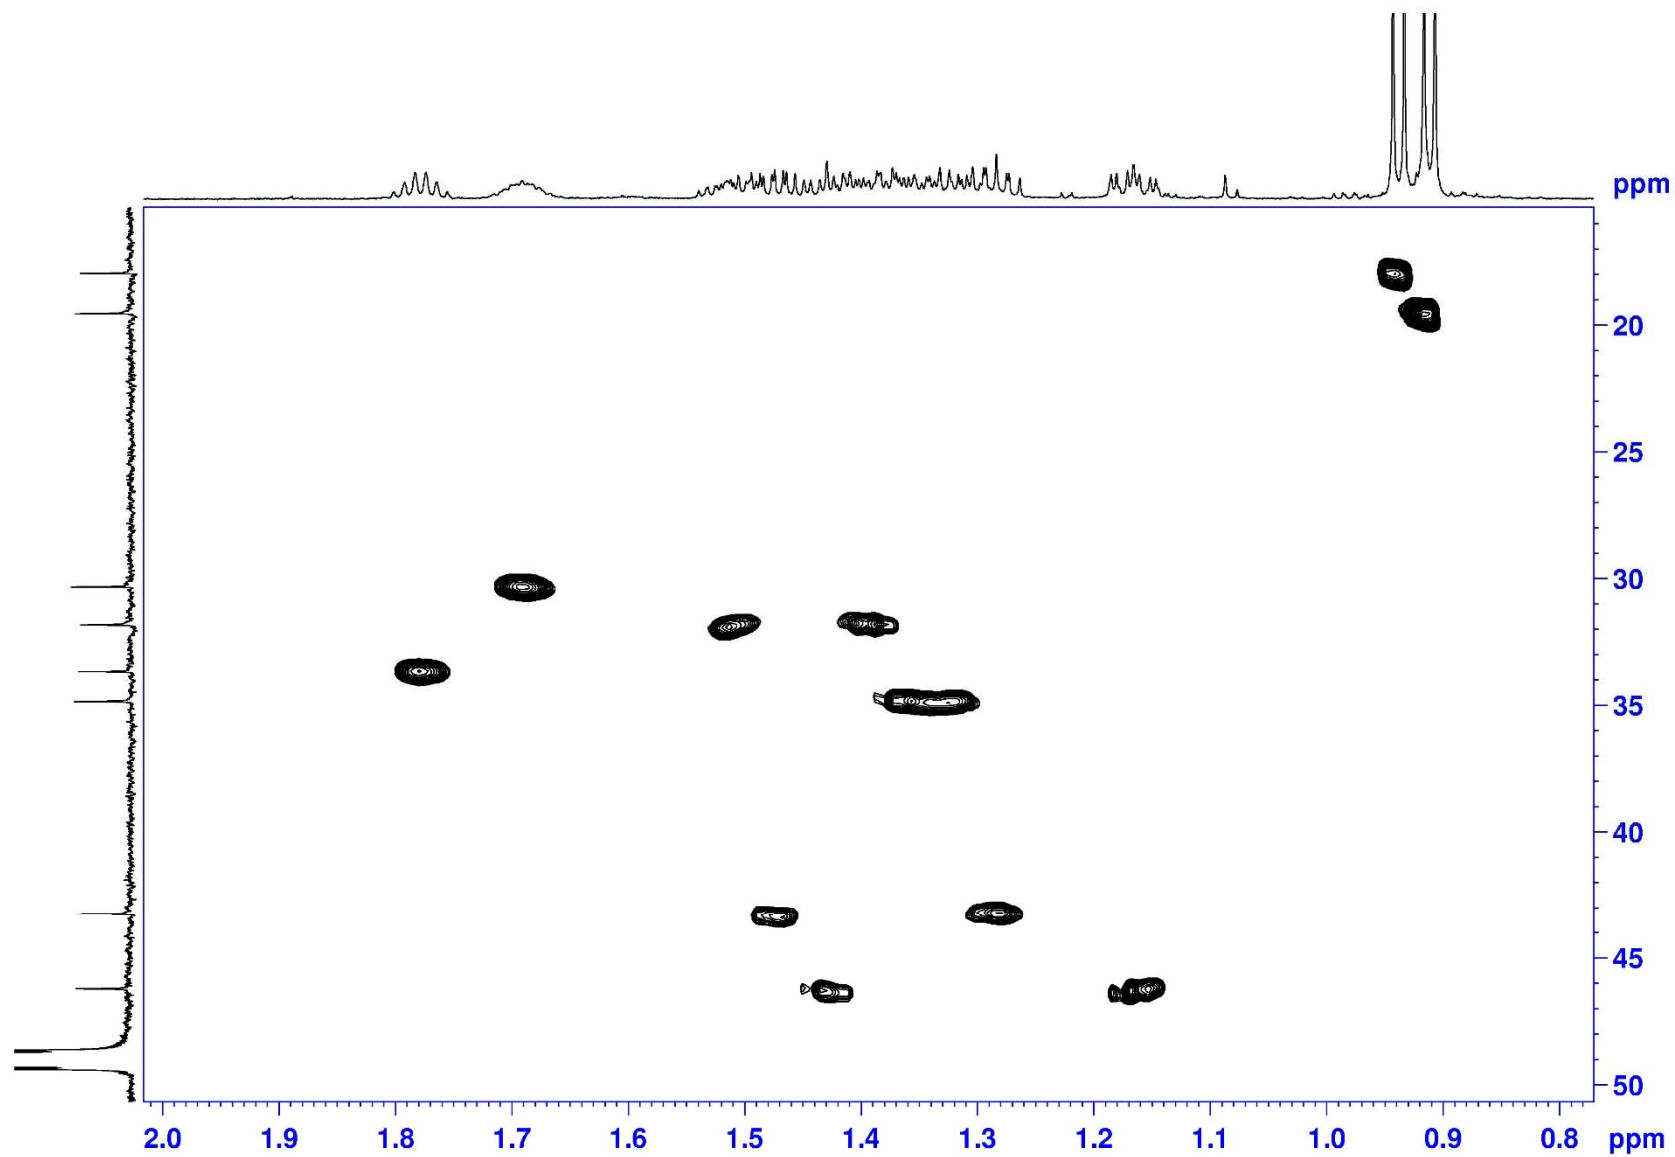

# HMBC (700 MHz) spectrum of the fragment **1a** in CD<sub>3</sub>OD

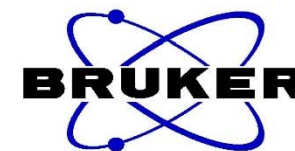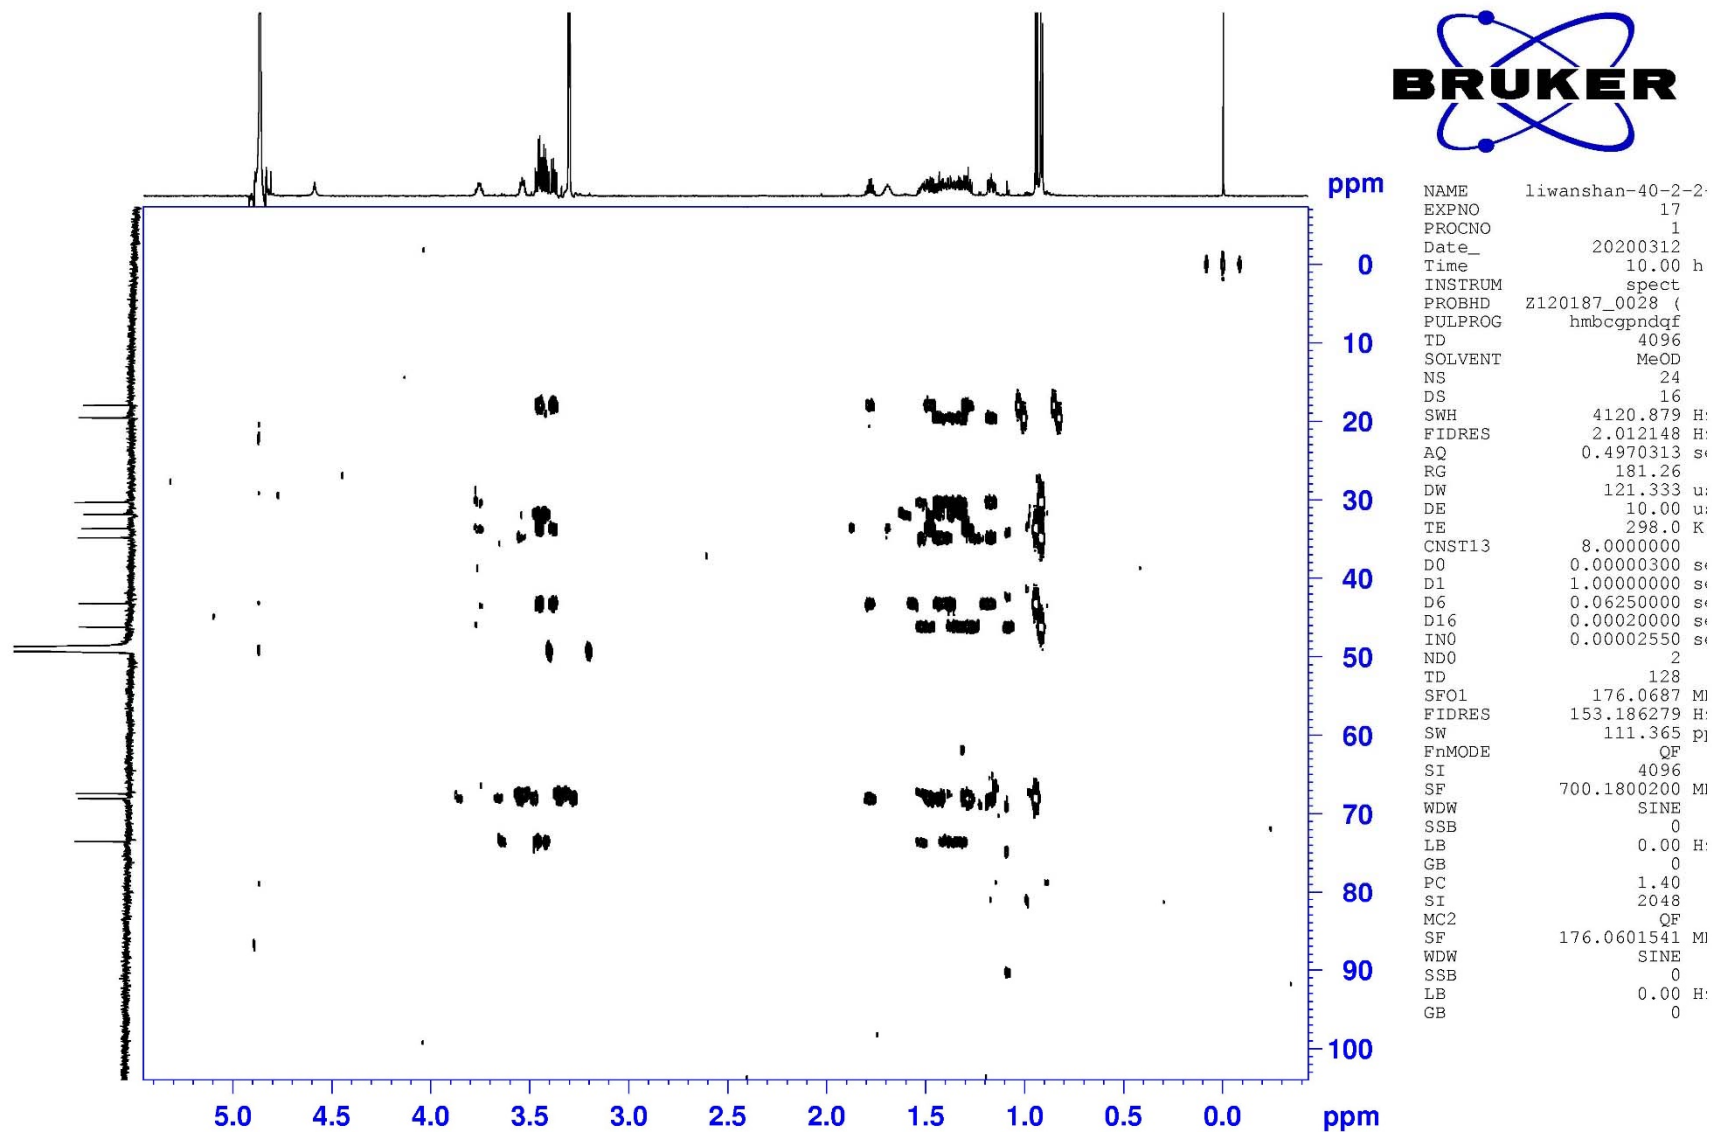

HMBC (700 MHz) spectrum of the fragment **1a** in CD<sub>3</sub>OD

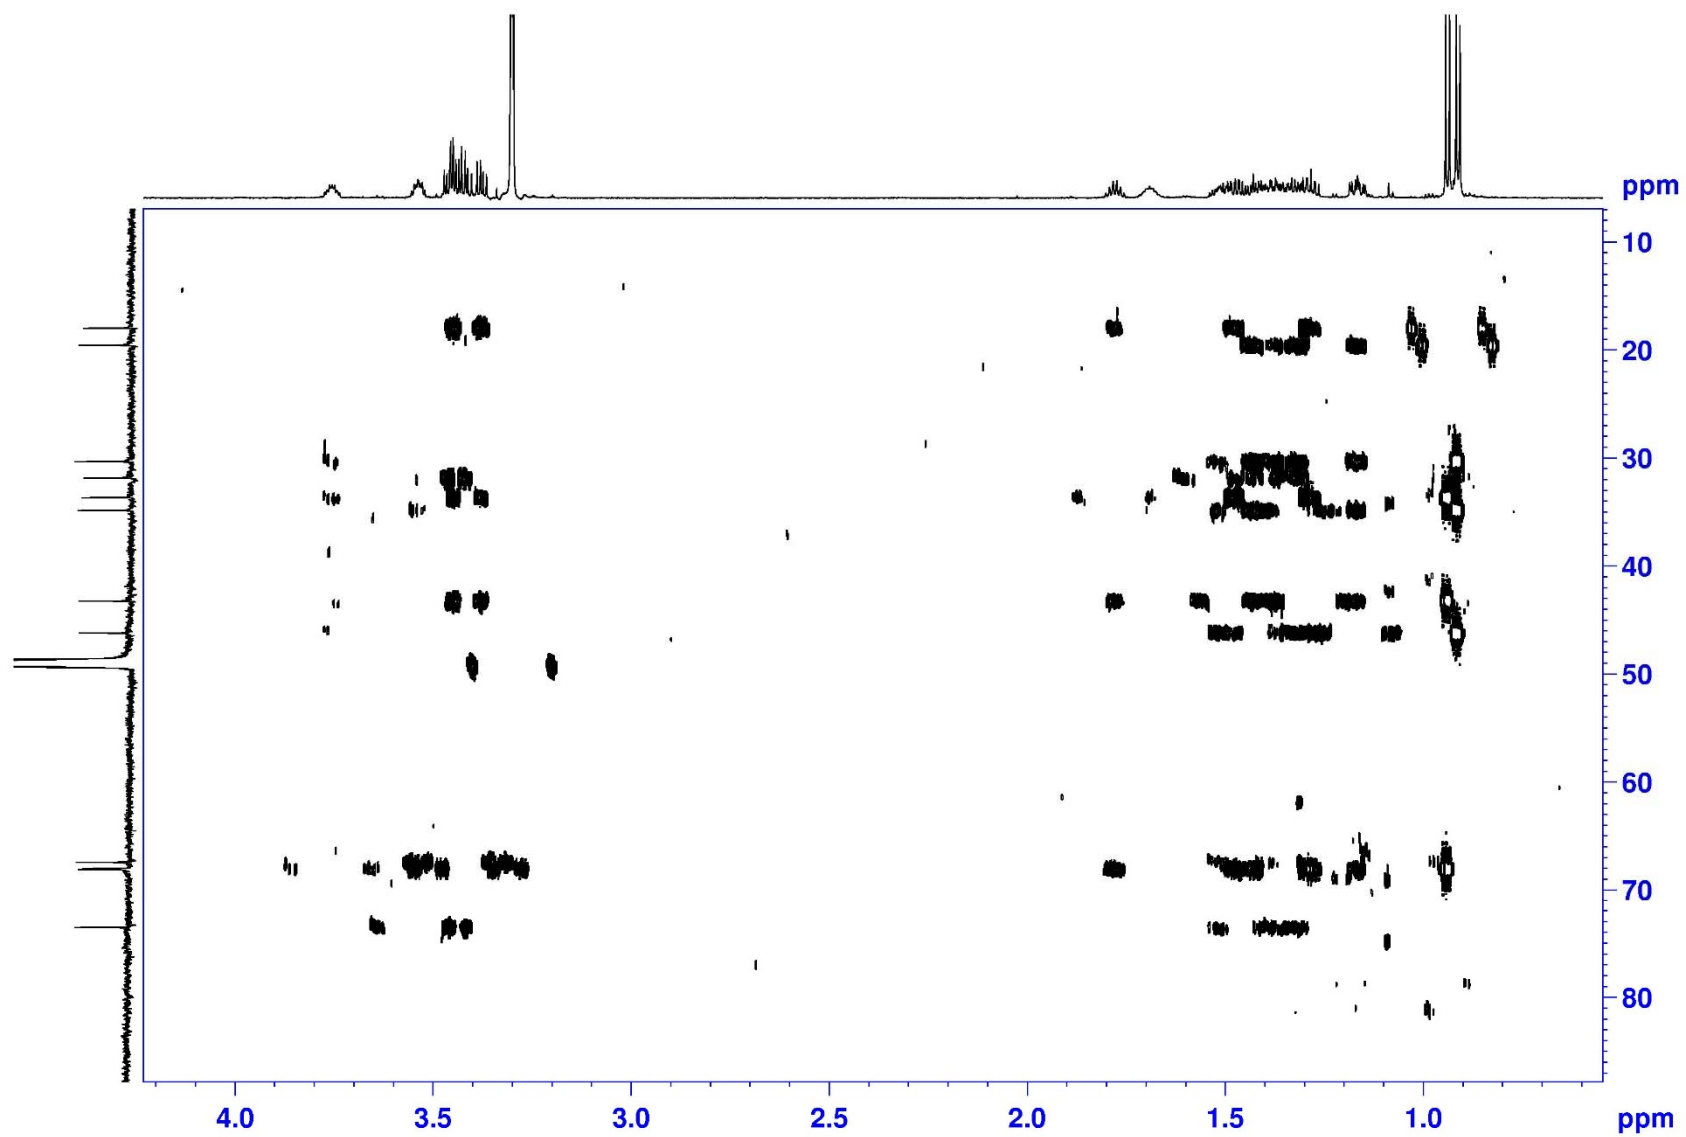

# 2D JRES (700 MHz) spectrum of the fragment **1a** in CD<sub>3</sub>OD

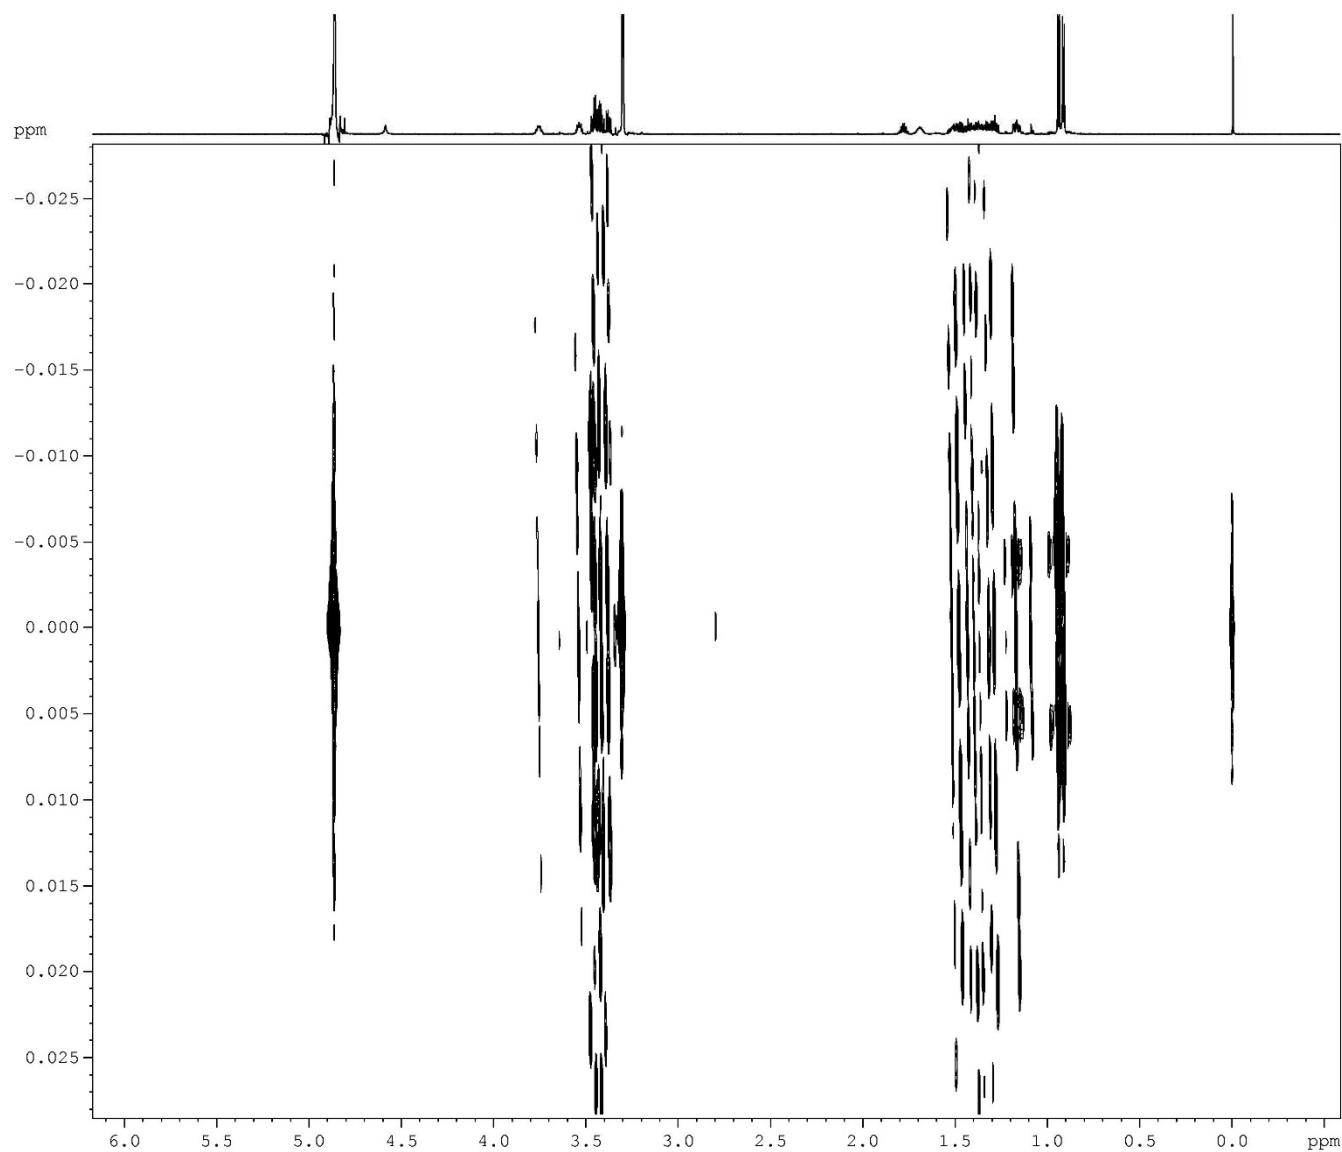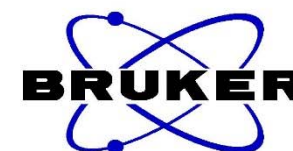

```
NAME      liwanshan-40-2-2-03-1
EXPNO     20
PROCNO    1
Date_     20200403
Time      21.55 h
INSTRUM   spect
PROBHD    Z120187_0028 (
PULPROG   jresgpprqf
TD        8192
SOLVENT   MeOD
NS        128
DS        16
SWH       4734.849 Hz
FIDRES    1.155969 Hz
AQ        0.8651252 sec
RG        111.13
DW        105.600 usec
DE        10.00 usec
TE        298.0 K
D0        0.0000300 sec
D1        1.0000000 sec
D11       0.0300000 sec
D12       0.0000200 sec
D16       0.0002000 sec
IN0       0.0125000 sec
ND0       2
TD        40
SFO1      700.182 MHz
FIDRES    1.000000 Hz
SW        0.057 ppm
FnMODE    QF
SI        16384
SF        700.1800192 MHz
WDW       SINE
SSB       0
LB        0.00 Hz
GB        0
PC        1.00
SI        128
MC2       QF
SF        700.1819742 MHz
WDW       SINE
SSB       0
LB        0.00 Hz
GB        0
```

2D JRES (700 MHz) spectrum of the fragment **1a** in CD<sub>3</sub>OD

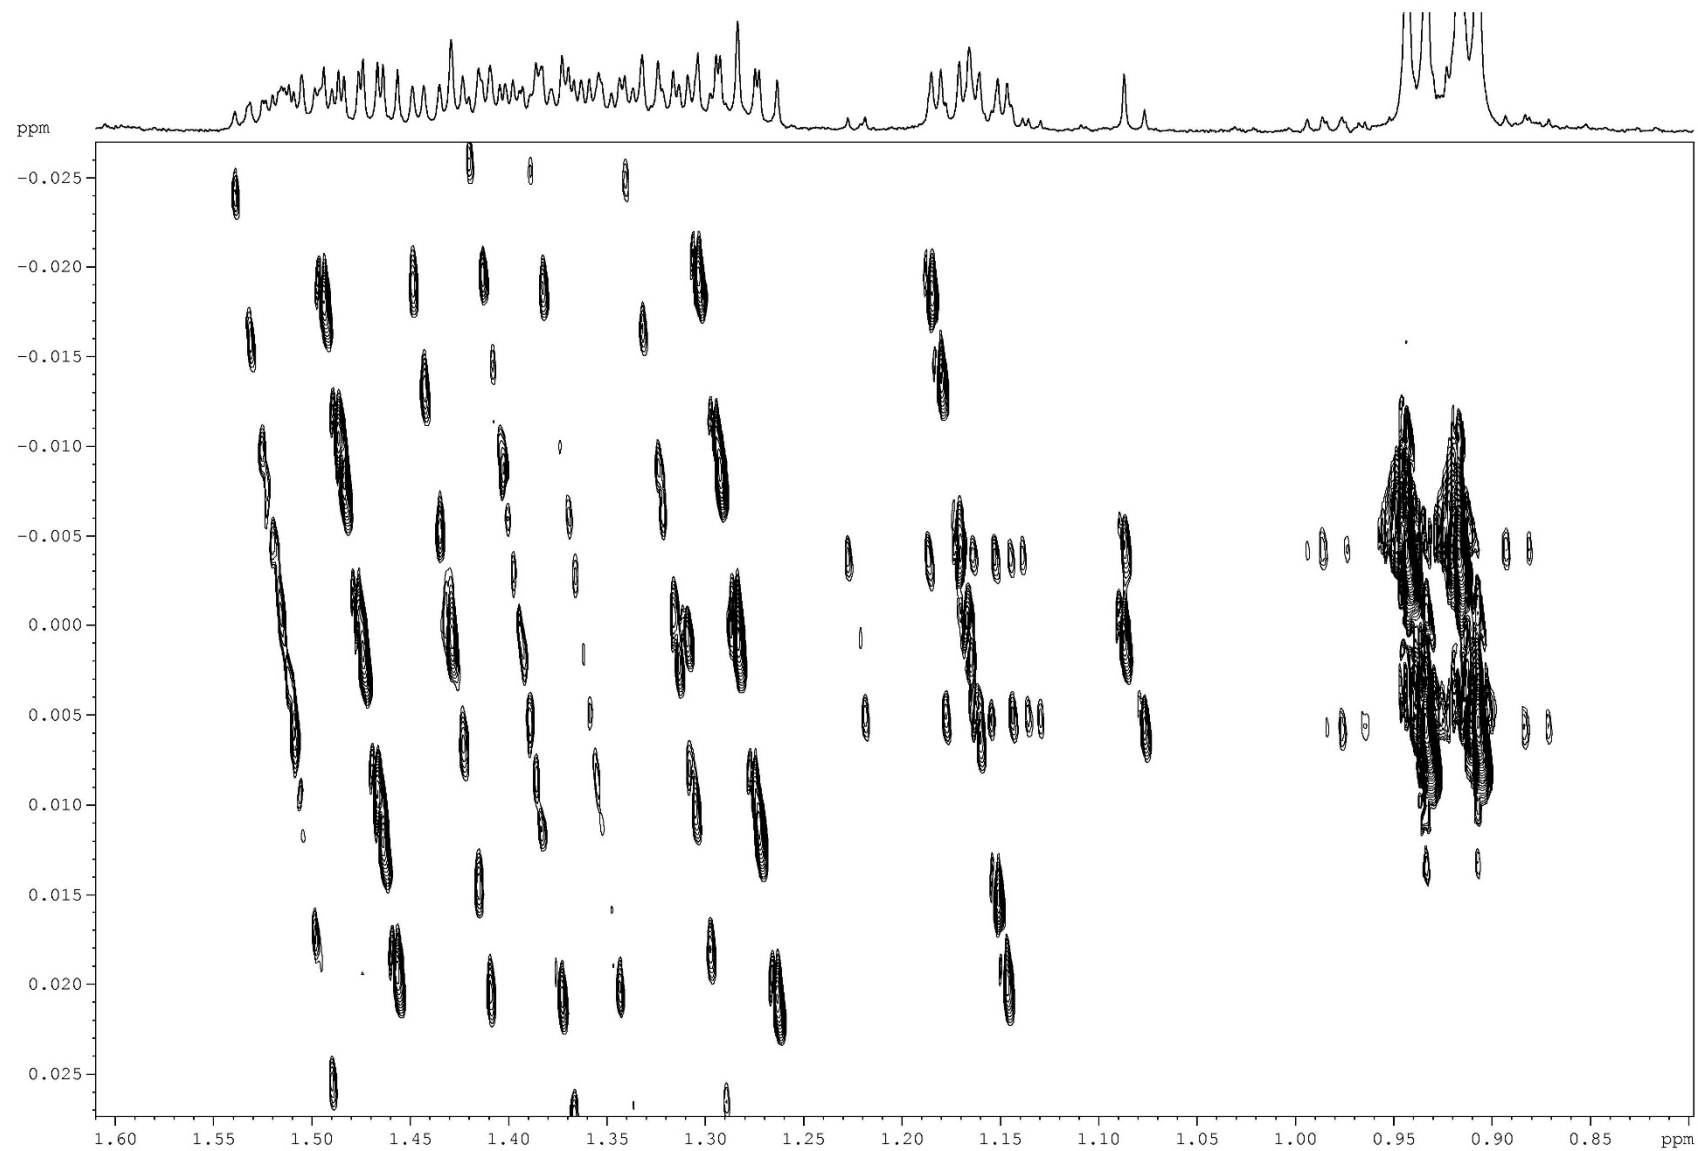

# 2D JRES (700 MHz) spectrum of the fragment **1a** in CD<sub>3</sub>OD

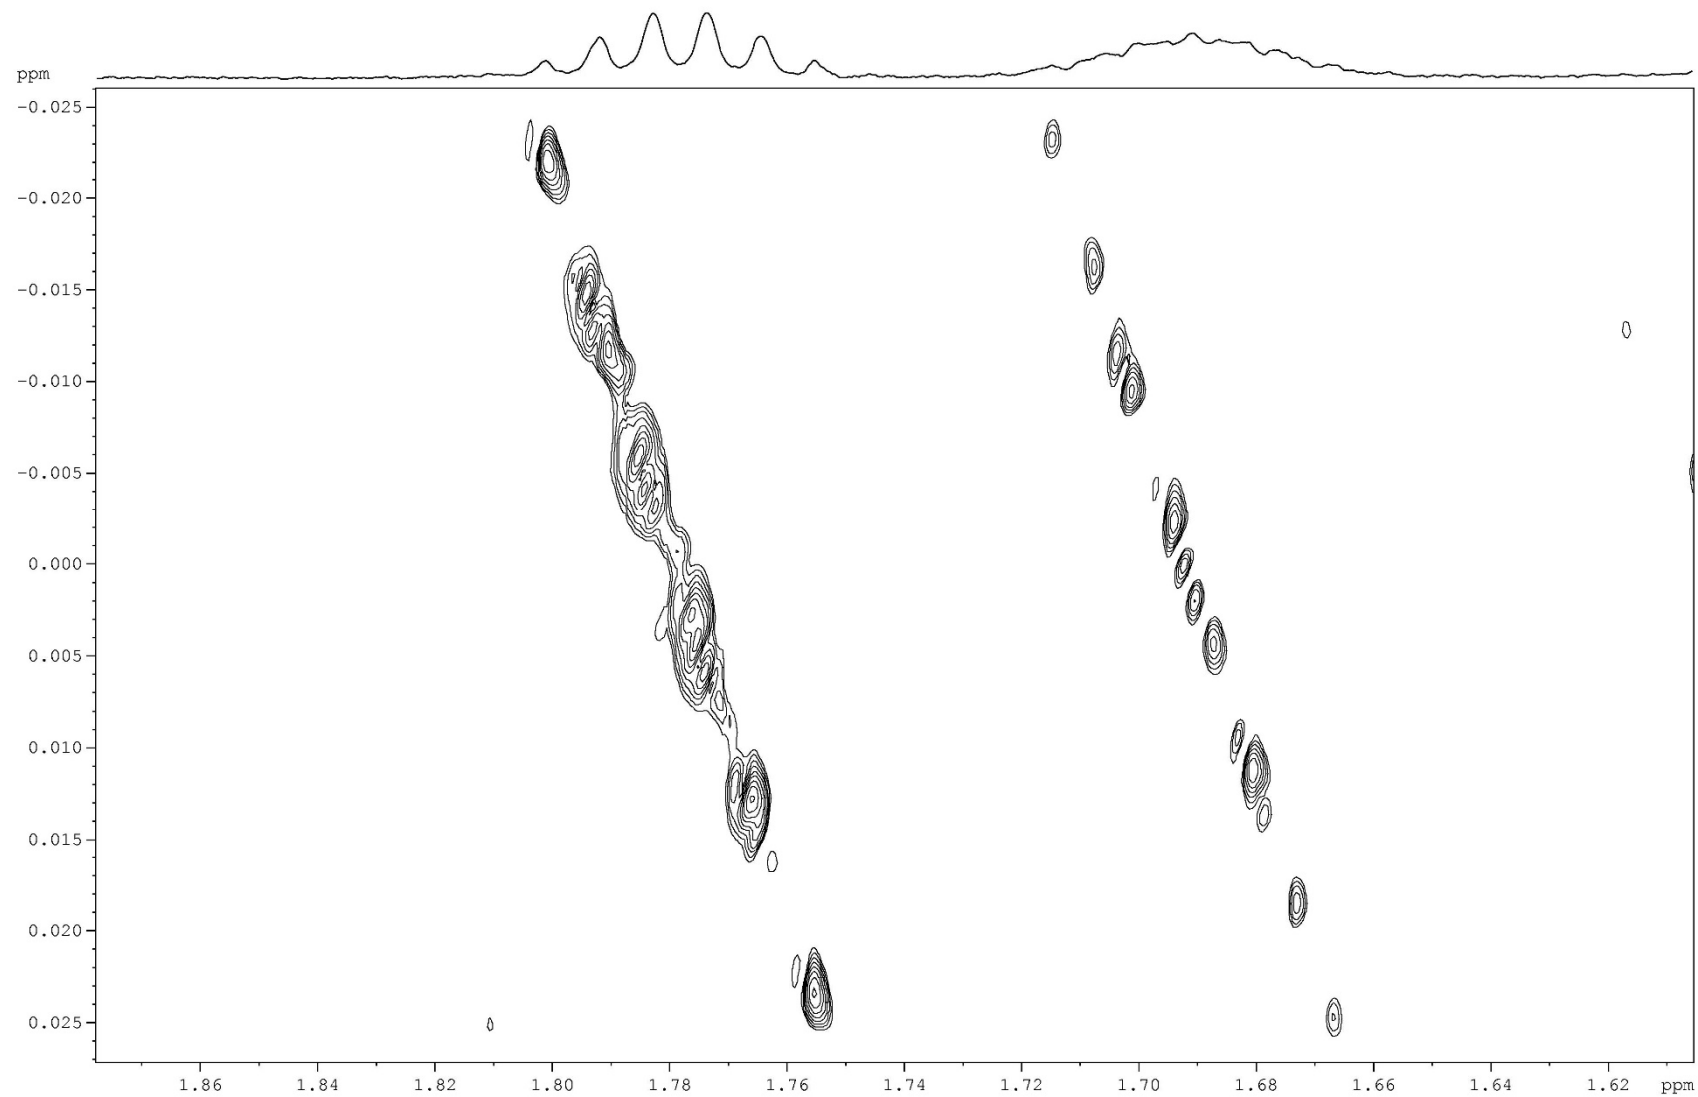

2D JRES (700 MHz) spectrum of the fragment **1a** in CD<sub>3</sub>OD

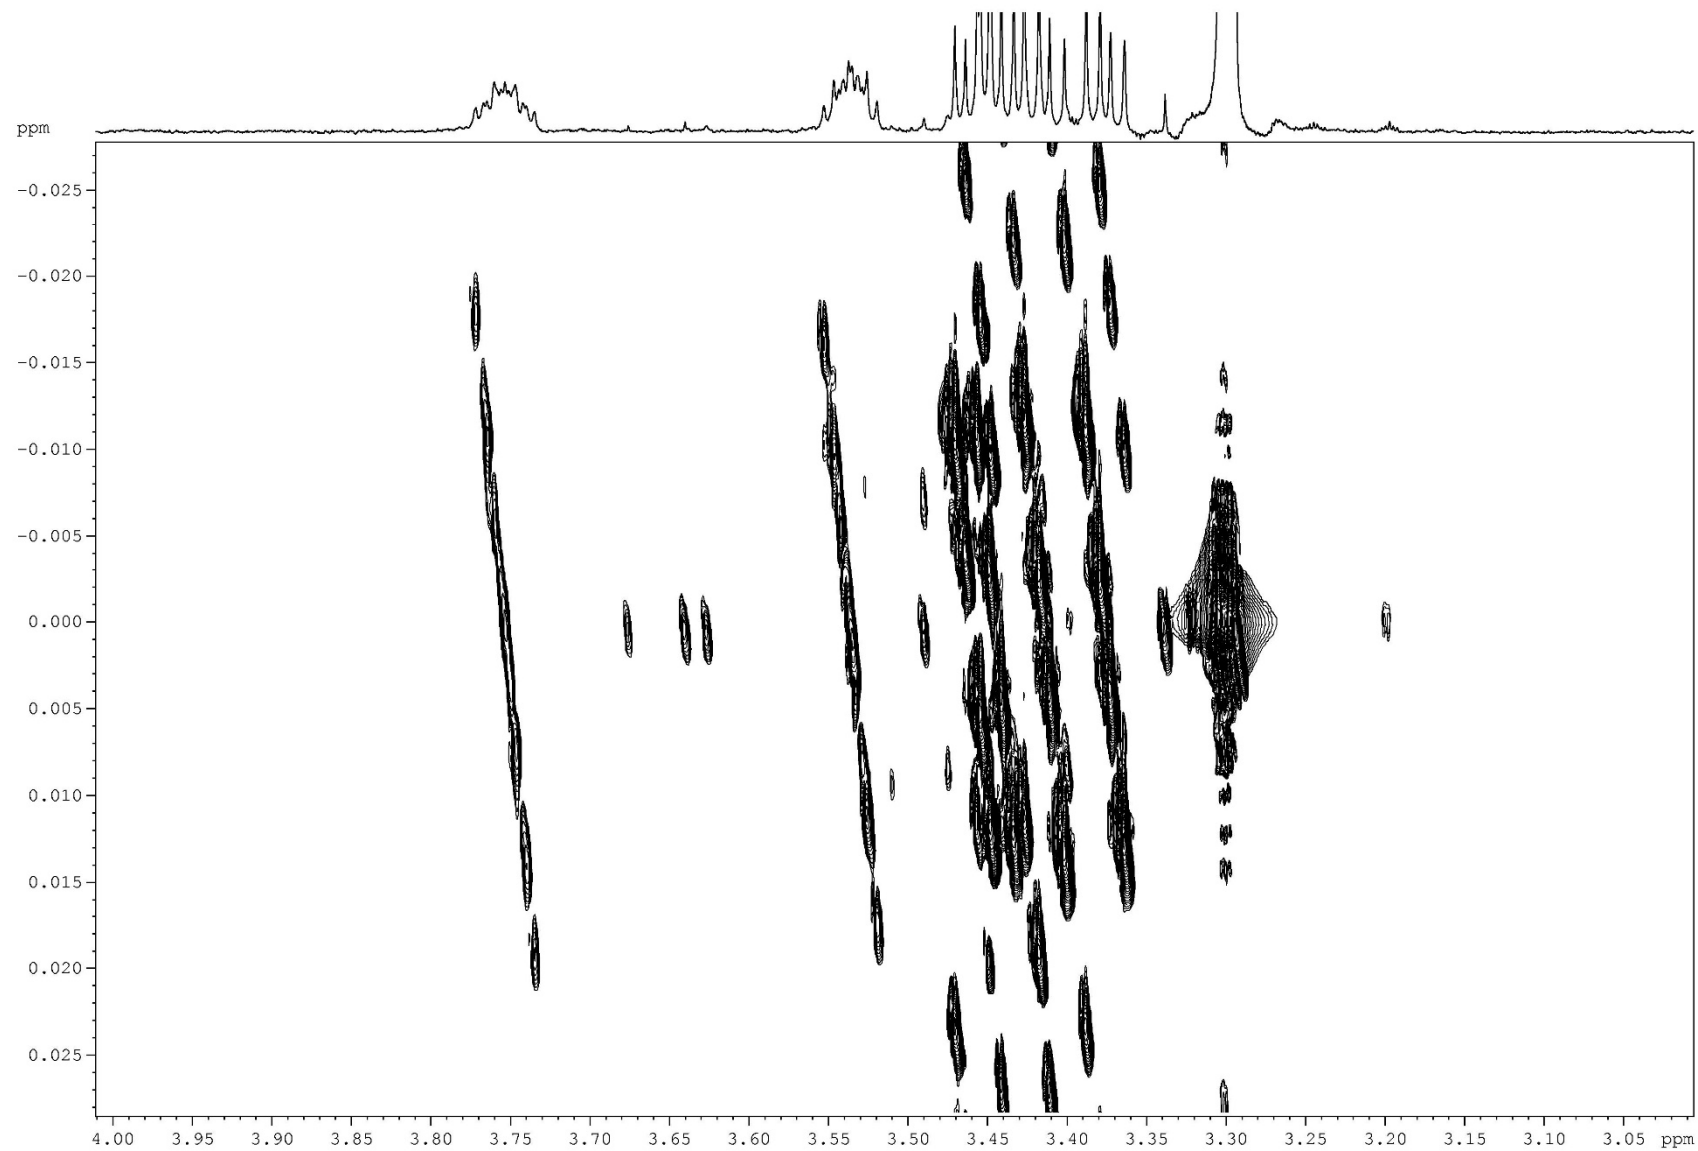

# HETLOC (700 MHz) spectrum of the fragment **1a** in CD<sub>3</sub>OD

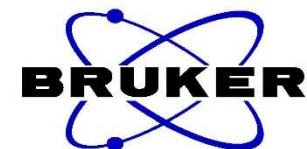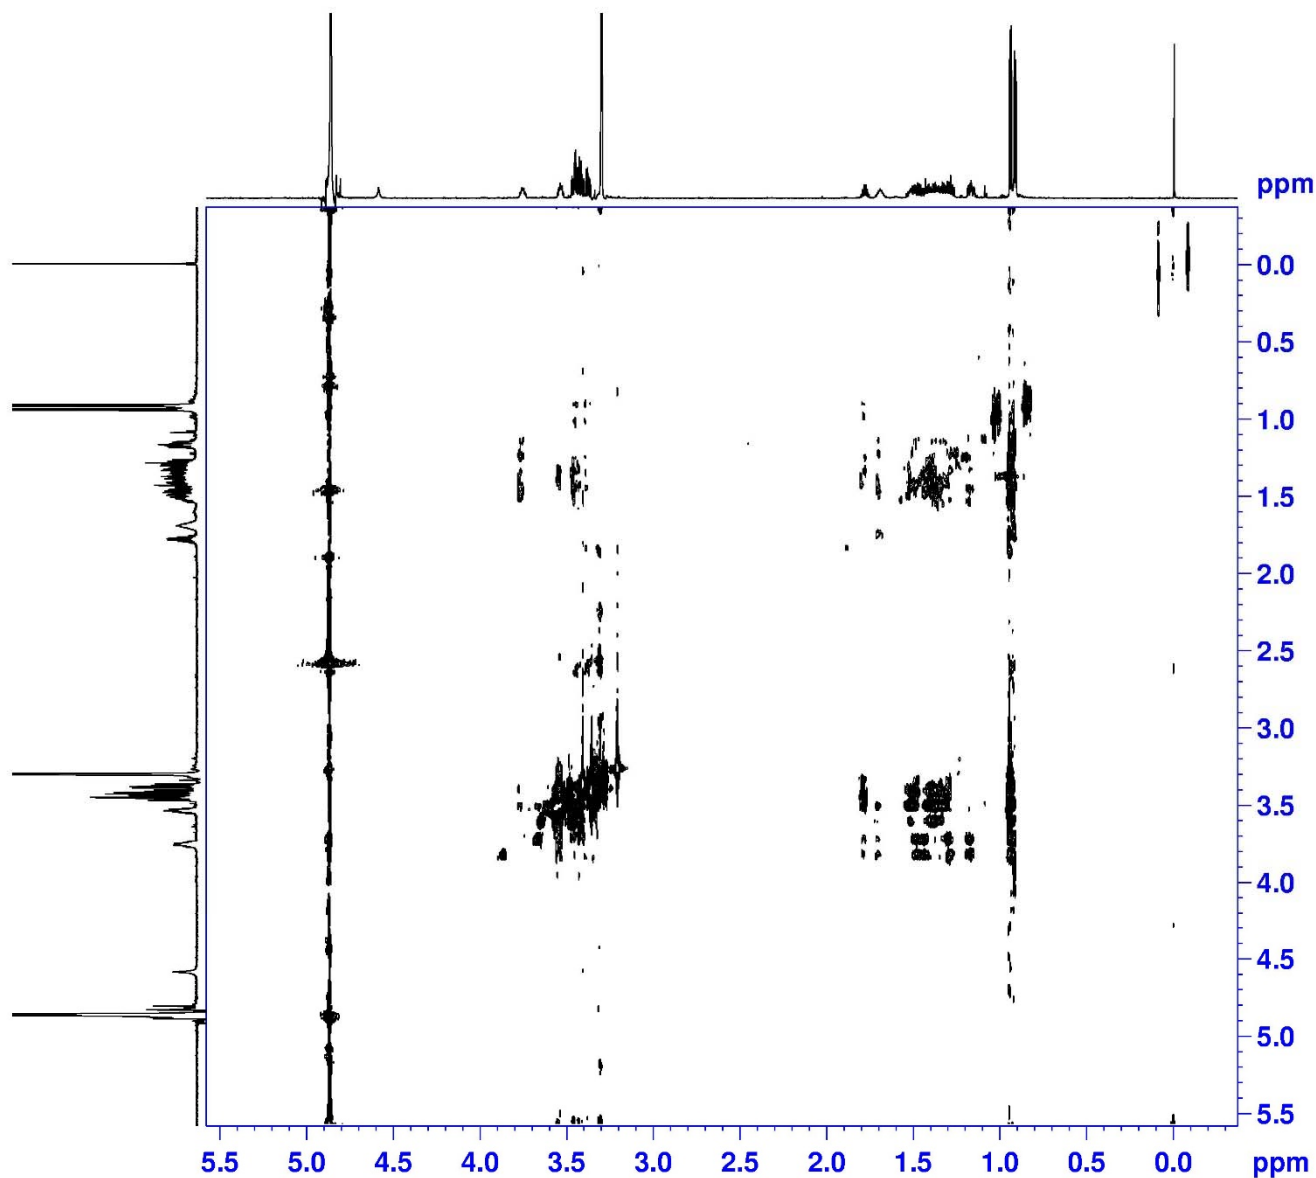

```

NAME      Liwanshan-40-2-2-03-1
EXPNO     21
PROCNO    1
Date_     20200404
Time      1.18 h
INSTRUM   spect
PROBHD    z120187_0028 (
PULPROG   dipsi2etgpjcsix1
TD         4096
SOLVENT   MeOD
NS         64
DS         16
SWH       4166.667 Hz
FIDRES    2.034505 Hz
AQ         0.4915700 sec
RG         181.26
DW         120.000 usec
DE         10.00 usec
TE         298.0 K
CNST2     145.0000000
CNST16    0.5000000
D0         0.00000300 sec
D1         1.00000000 sec
D2         0.00344828 sec
D4         0.00172414 sec
D9         0.08000000 sec
D11        0.03000000 sec
D16        0.00020000 sec
D20        0.00000300 sec
D28        0.00000300 sec
IN0        0.00012000 sec
IN20       0.00006000 sec
IN28       0.00006000 sec
L1         28
ND0        2
TD         128
SFO1      700.1818 MHz
FIDRES    32.552082 Hz
SW         5.951 ppm
FnMODE    Echo-Antiecho
SI         8192
SF         700.1800174 MHz
WDW        QSINE
SSB        2
LB         0.00 Hz
GB         0
PC         1.40
SI         1024
MC2        echo-antiecho
SF         700.1800076 MHz
WDW        QSINE
SSB        2
    
```



HETLOC (700 MHz) spectrum of the fragment **1a** in CD<sub>3</sub>OD

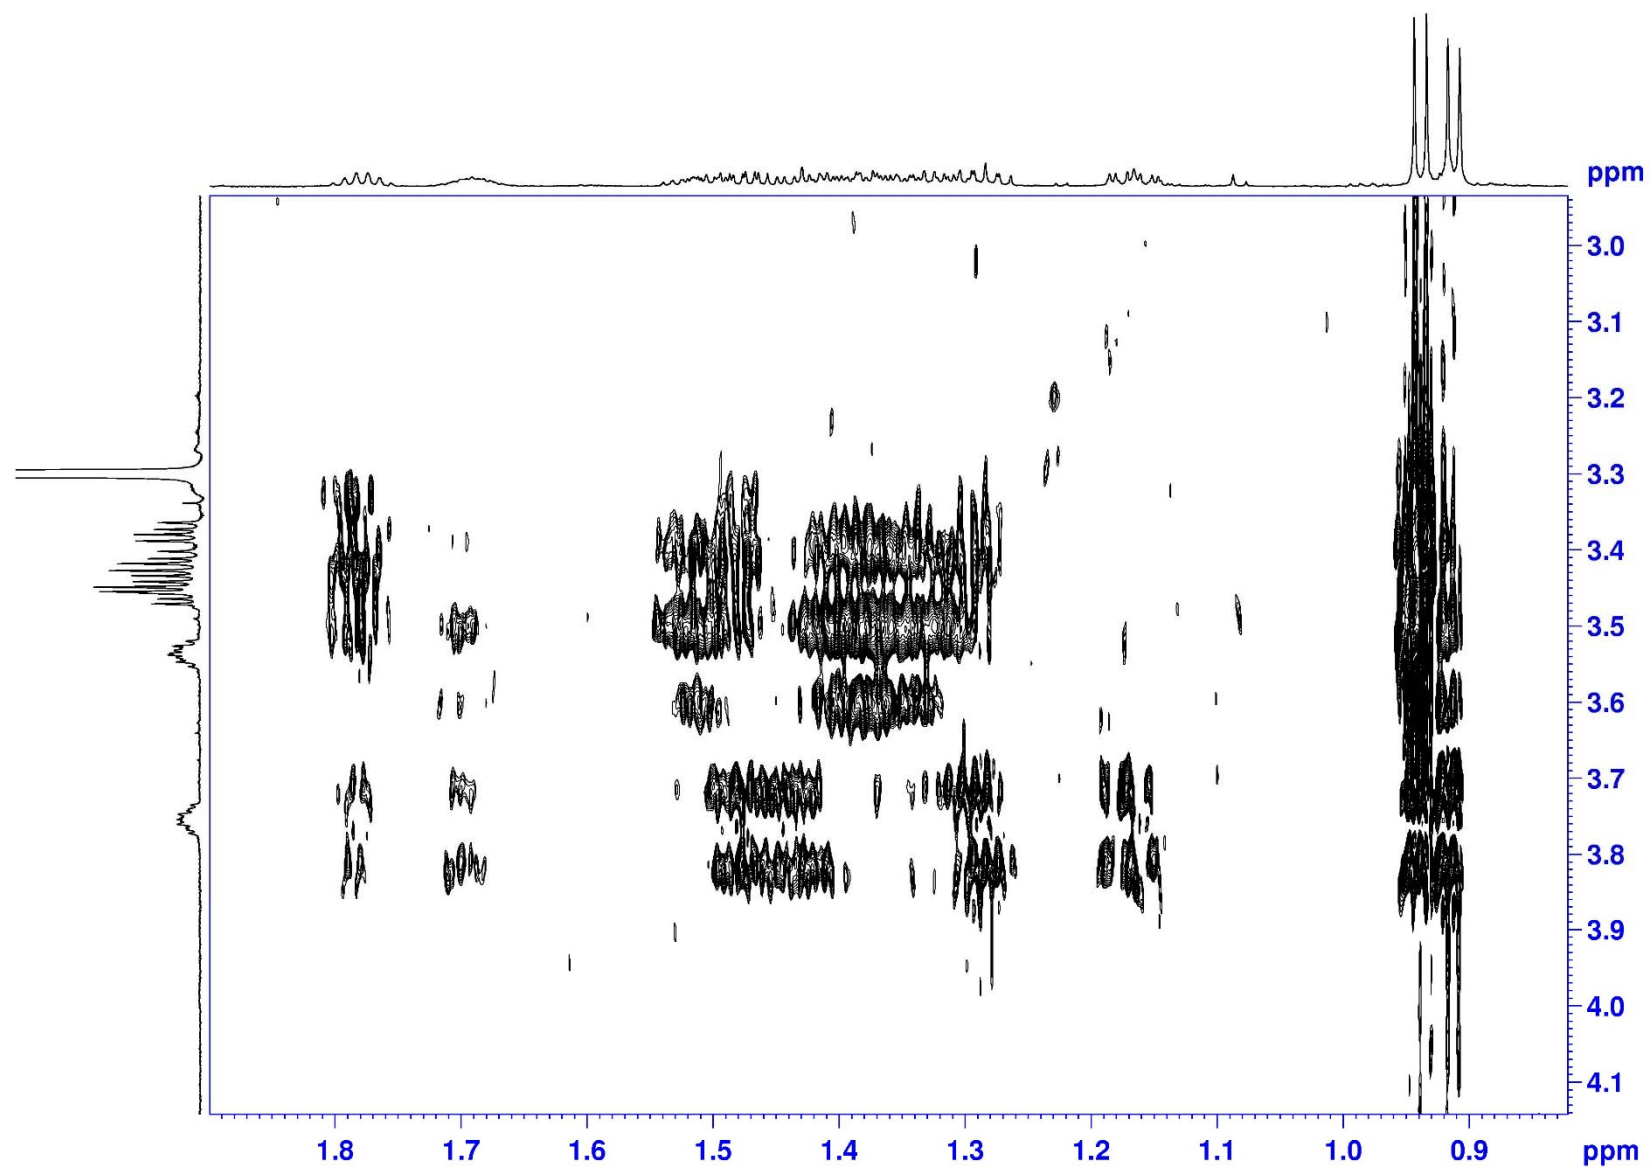

HETLOC (700 MHz) spectrum of the fragment **1a** in CD<sub>3</sub>OD

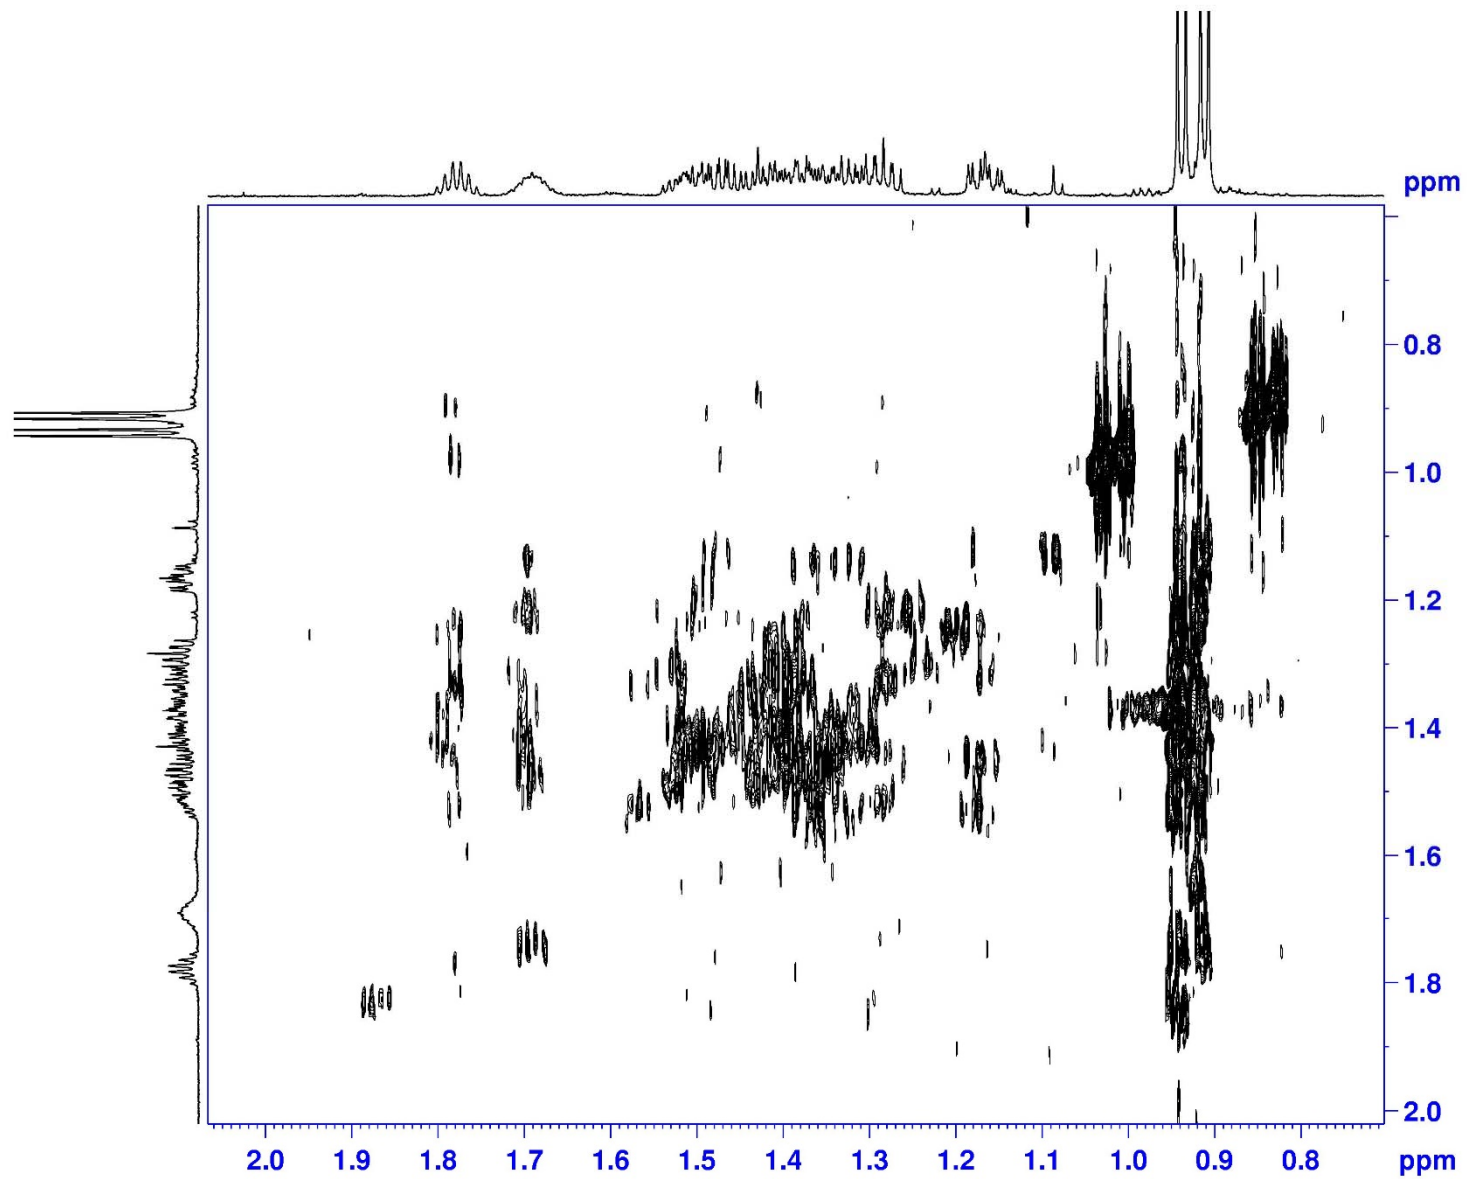

HETLOC (700 MHz) spectrum of the fragment **1a** in CD<sub>3</sub>OD

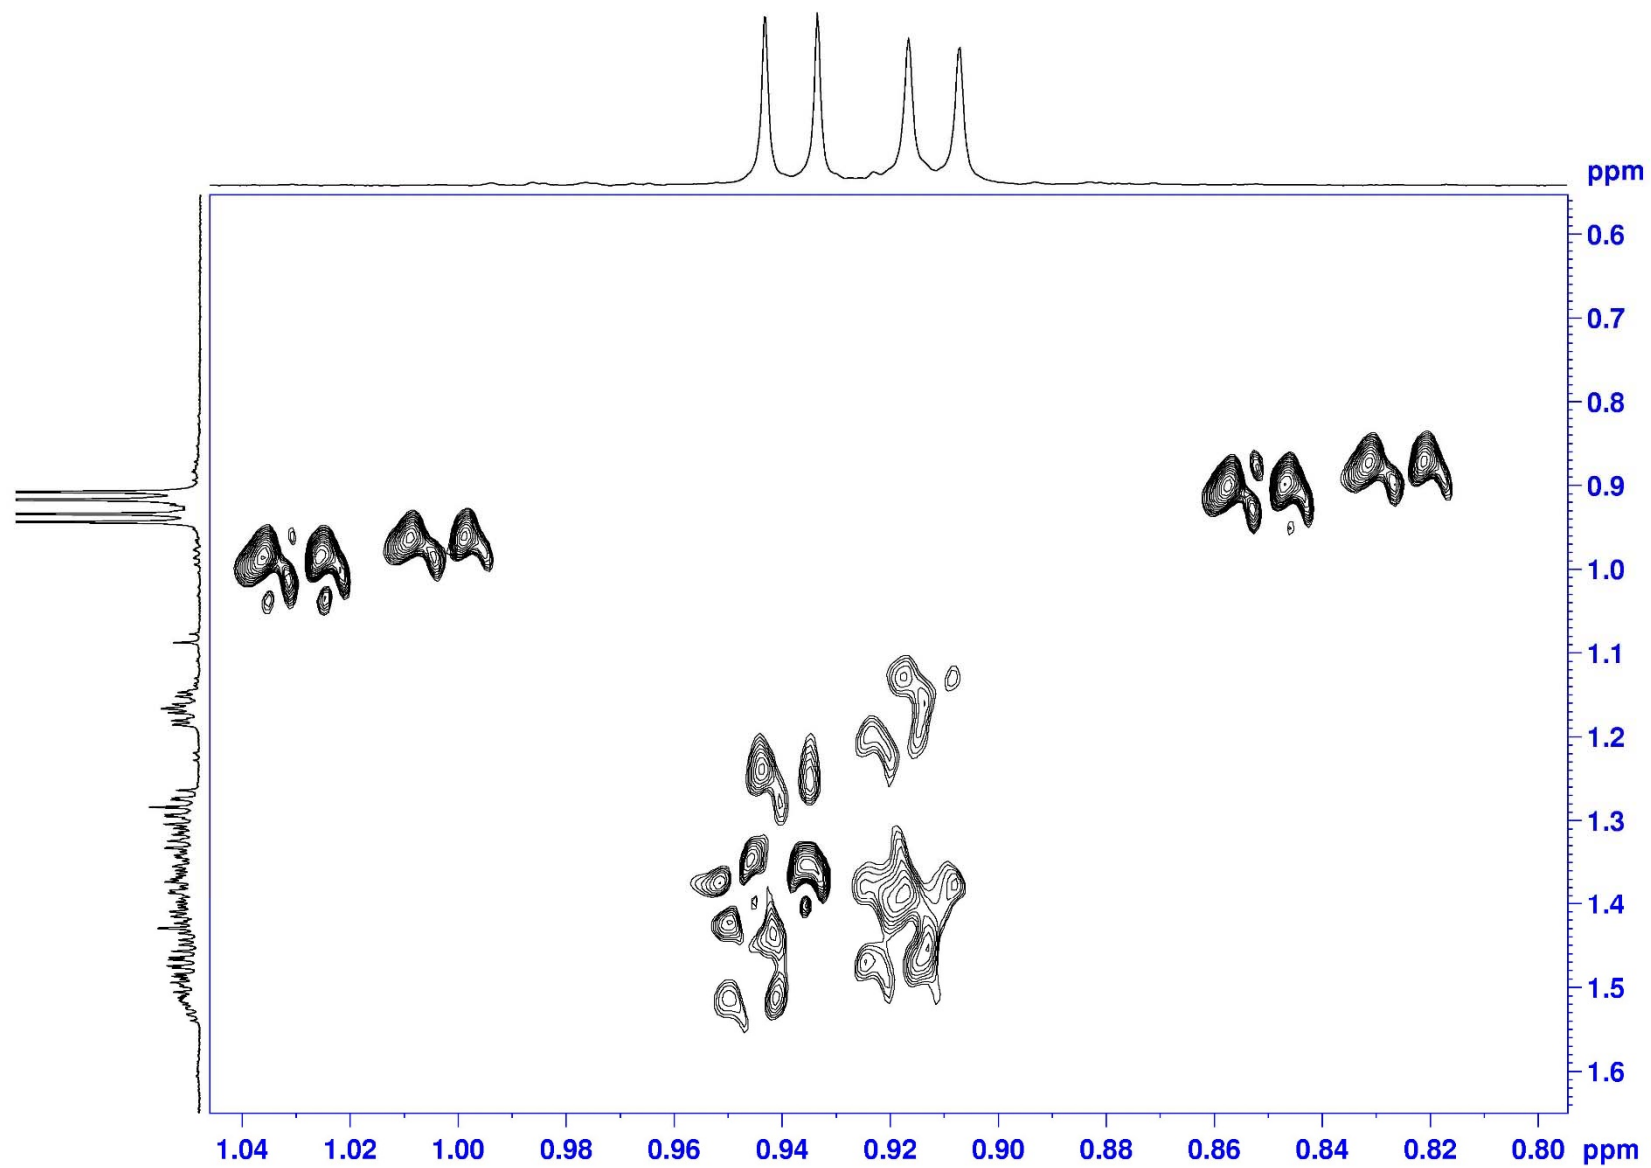

HETLOC (700 MHz) spectrum of the fragment **1a** in CD<sub>3</sub>OD

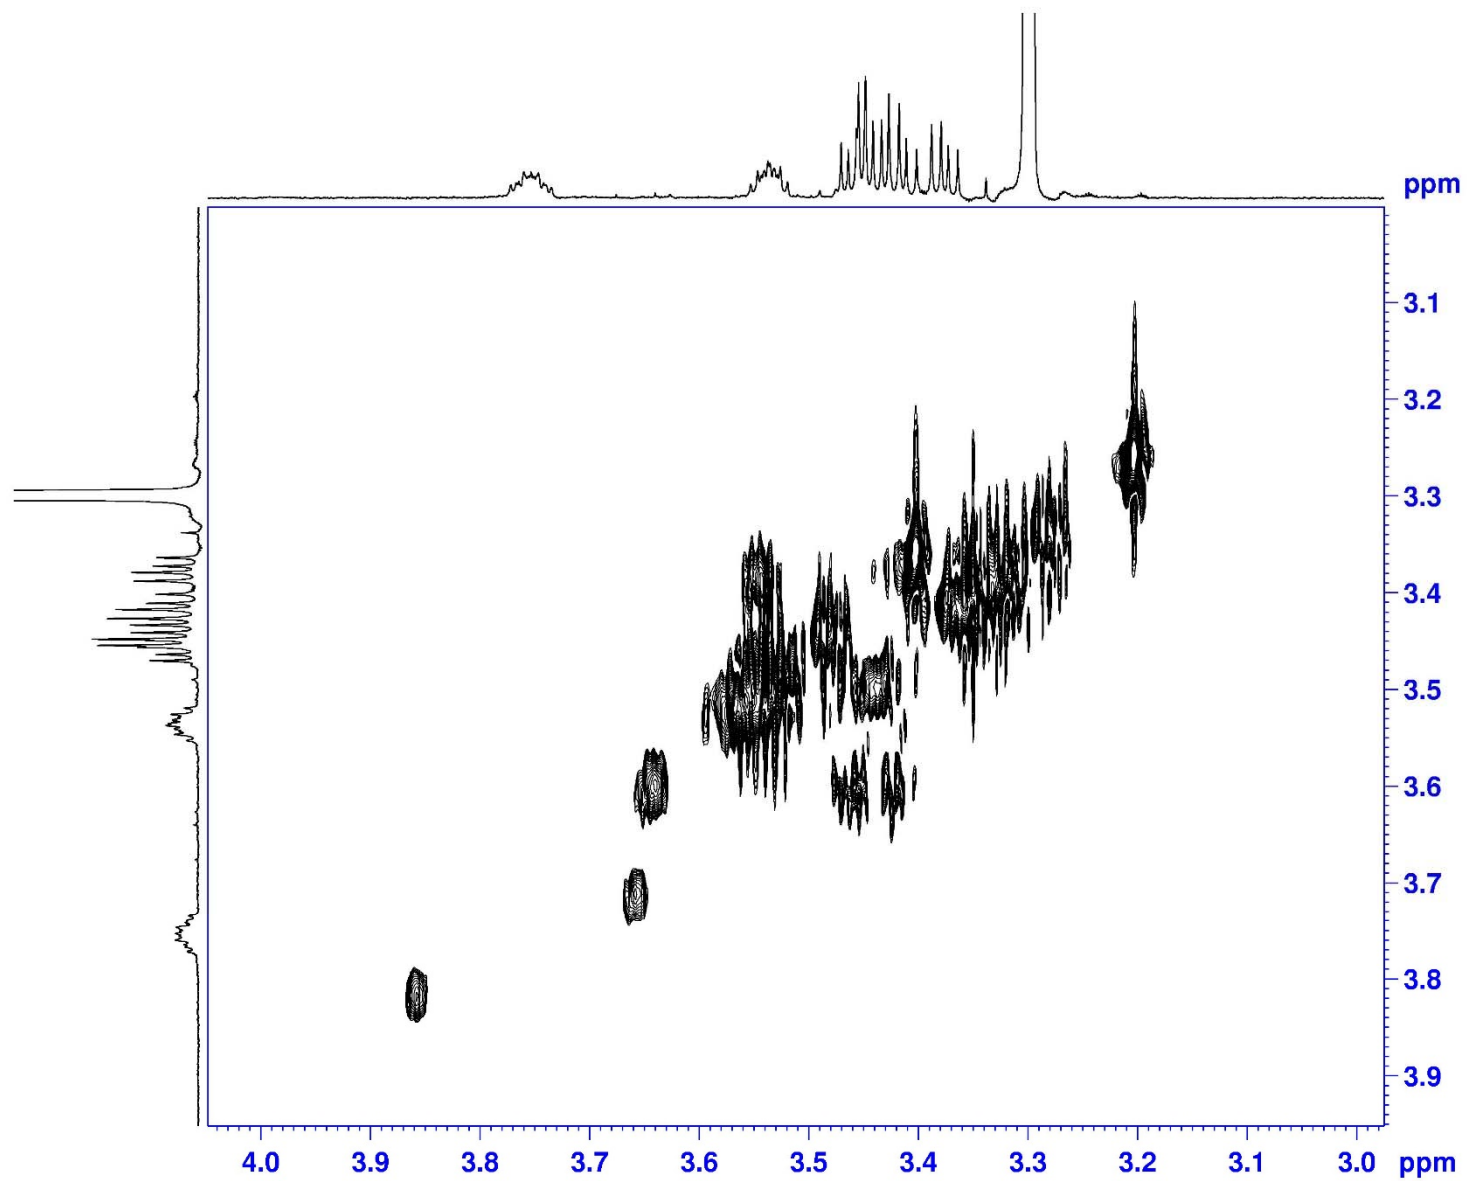

# LR-ESI-MS for the fragment **1b**

## Generic Display Report

### Analysis Info

Analysis Name D:\Data\amazon SL\MS\data\202007\jiangzhongping\_40-2-2-03-2\_66\_01\_1956.d  
Method 1956.m  
Sample Name jiangzhongping\_40-2-2-03-2  
Comment  
Acquisition Date 2020-07-13 15:54:20  
Operator bruker  
Instrument amazon SL

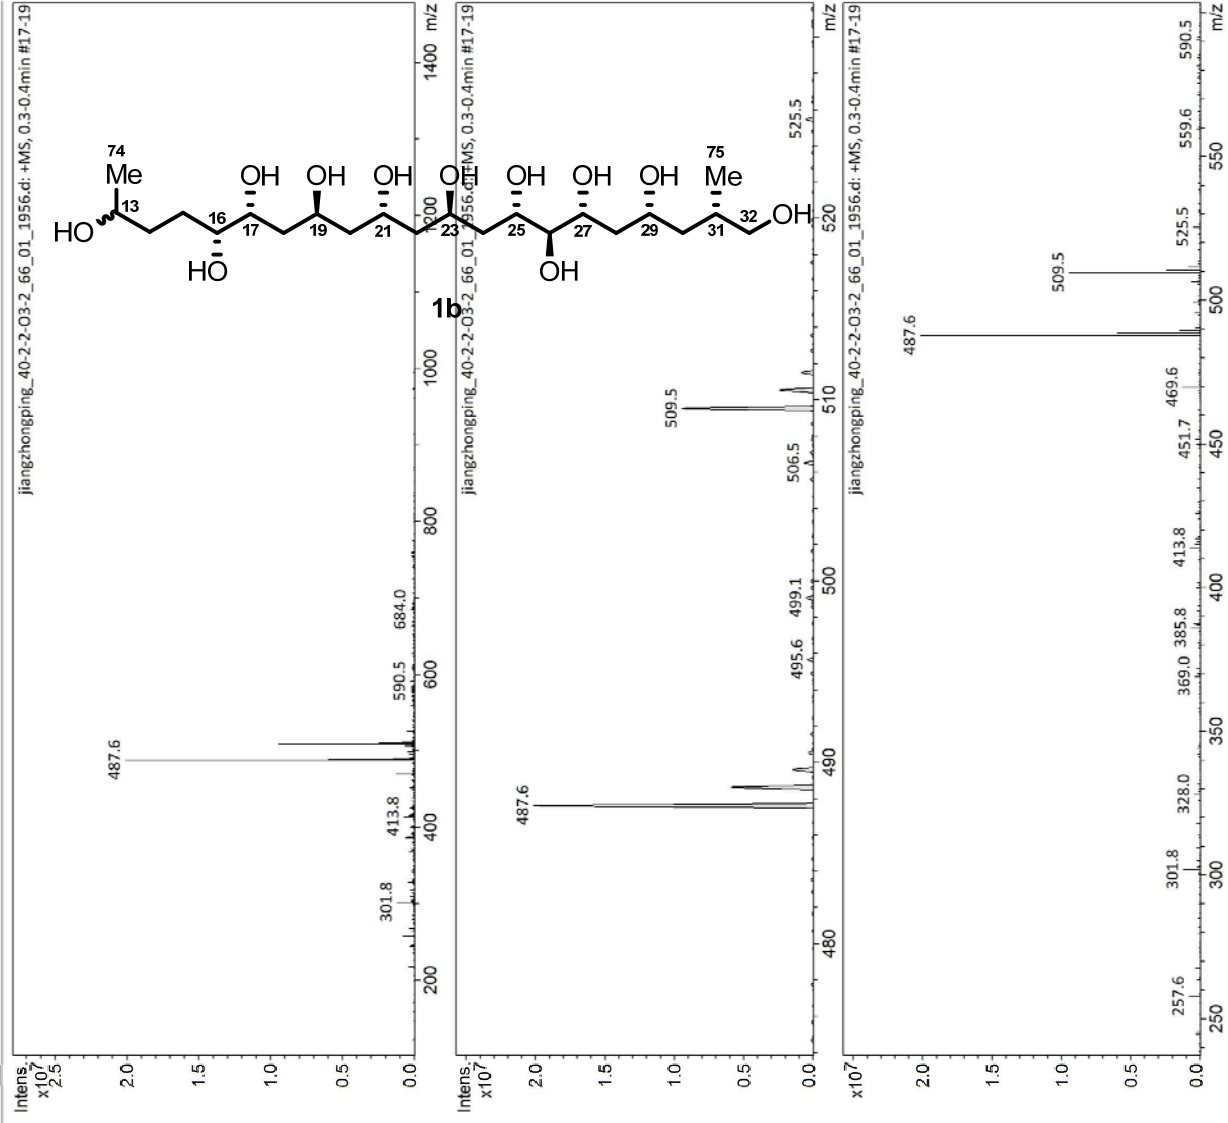

$^1\text{H}$  (700 MHz) NMR spectrum of the fragment **1b** in  $\text{CD}_3\text{OD}$

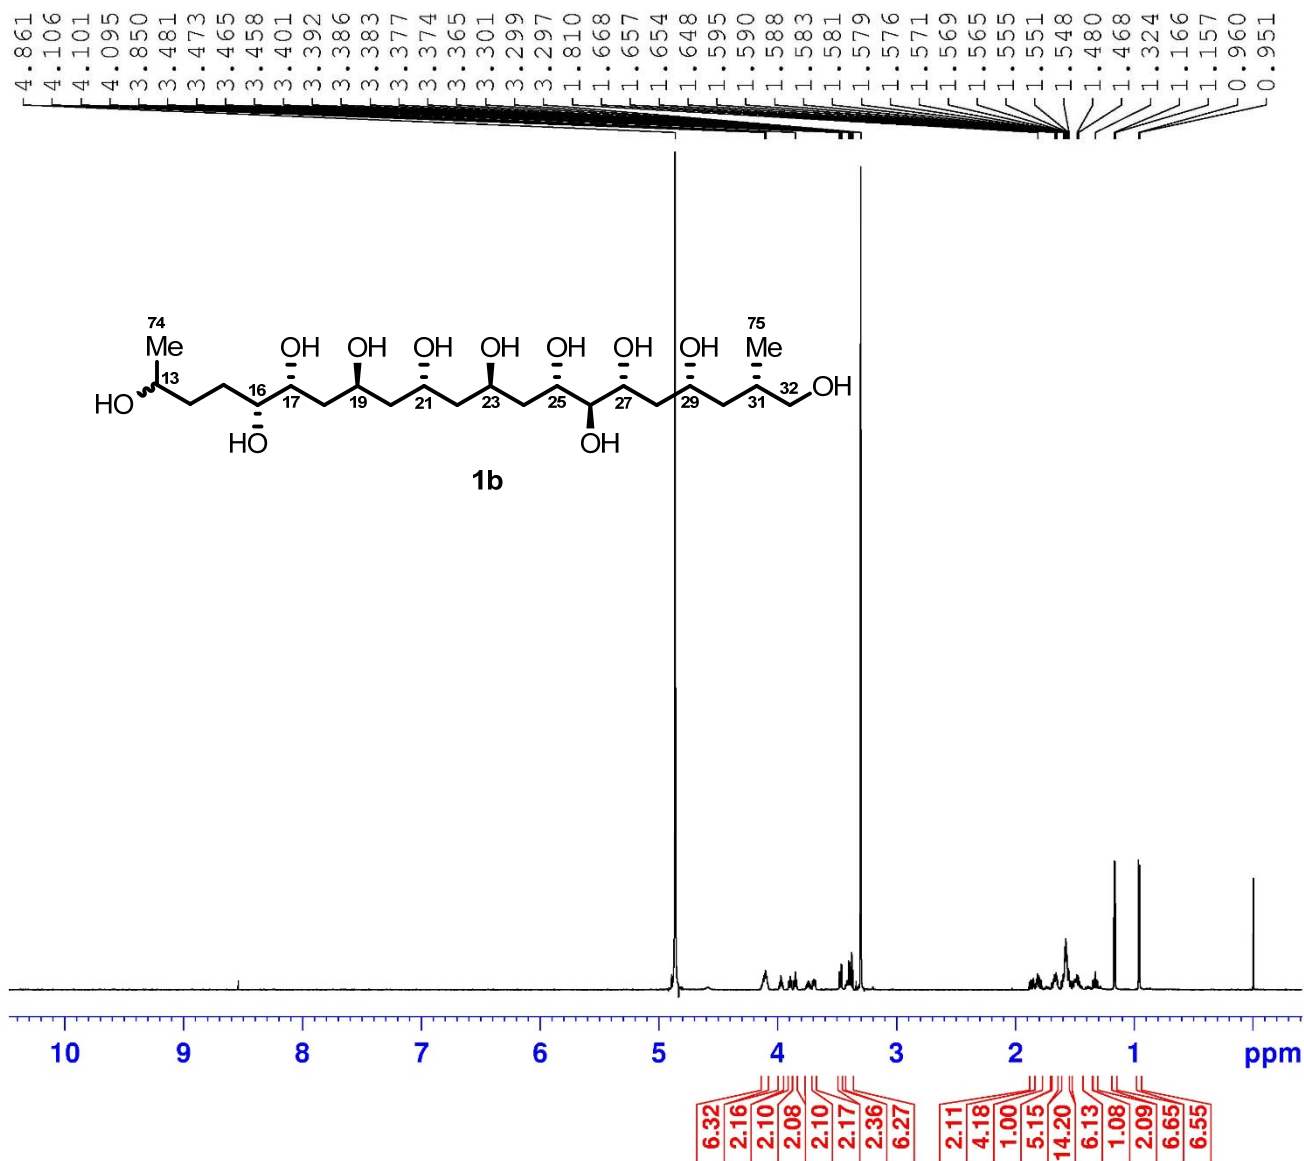

```

NAME      liwanshan-40-2-2-03-
EXPNO     12
PROCNO    1
Date_     20200307
Time      15.30 h
INSTRUM   spect
PROBHD    z120187_0028 (
PULPROG   zg30
TD         65536
SOLVENT   MeOD
NS         3
DS         2
SWH        14097.744 Hz
FIDRES     0.430229 Hz
AQ         2.3243935 sec
RG         3.96
DW         35.467 usec
DE         10.00 usec
TE         298.0 K
D1         1.50000000 sec
TD0        1
SF01       700.1843236 MHz
NUC1       1H
P1         8.10 usec
SI         65536
SF         700.1800211 MHz
WDW        EM
SSB        0
LB         0.30 Hz
GB         0
PC         1.00
    
```

$^1\text{H}$  (700 MHz) NMR spectrum of the fragment **1b** in  $\text{CD}_3\text{OD}$

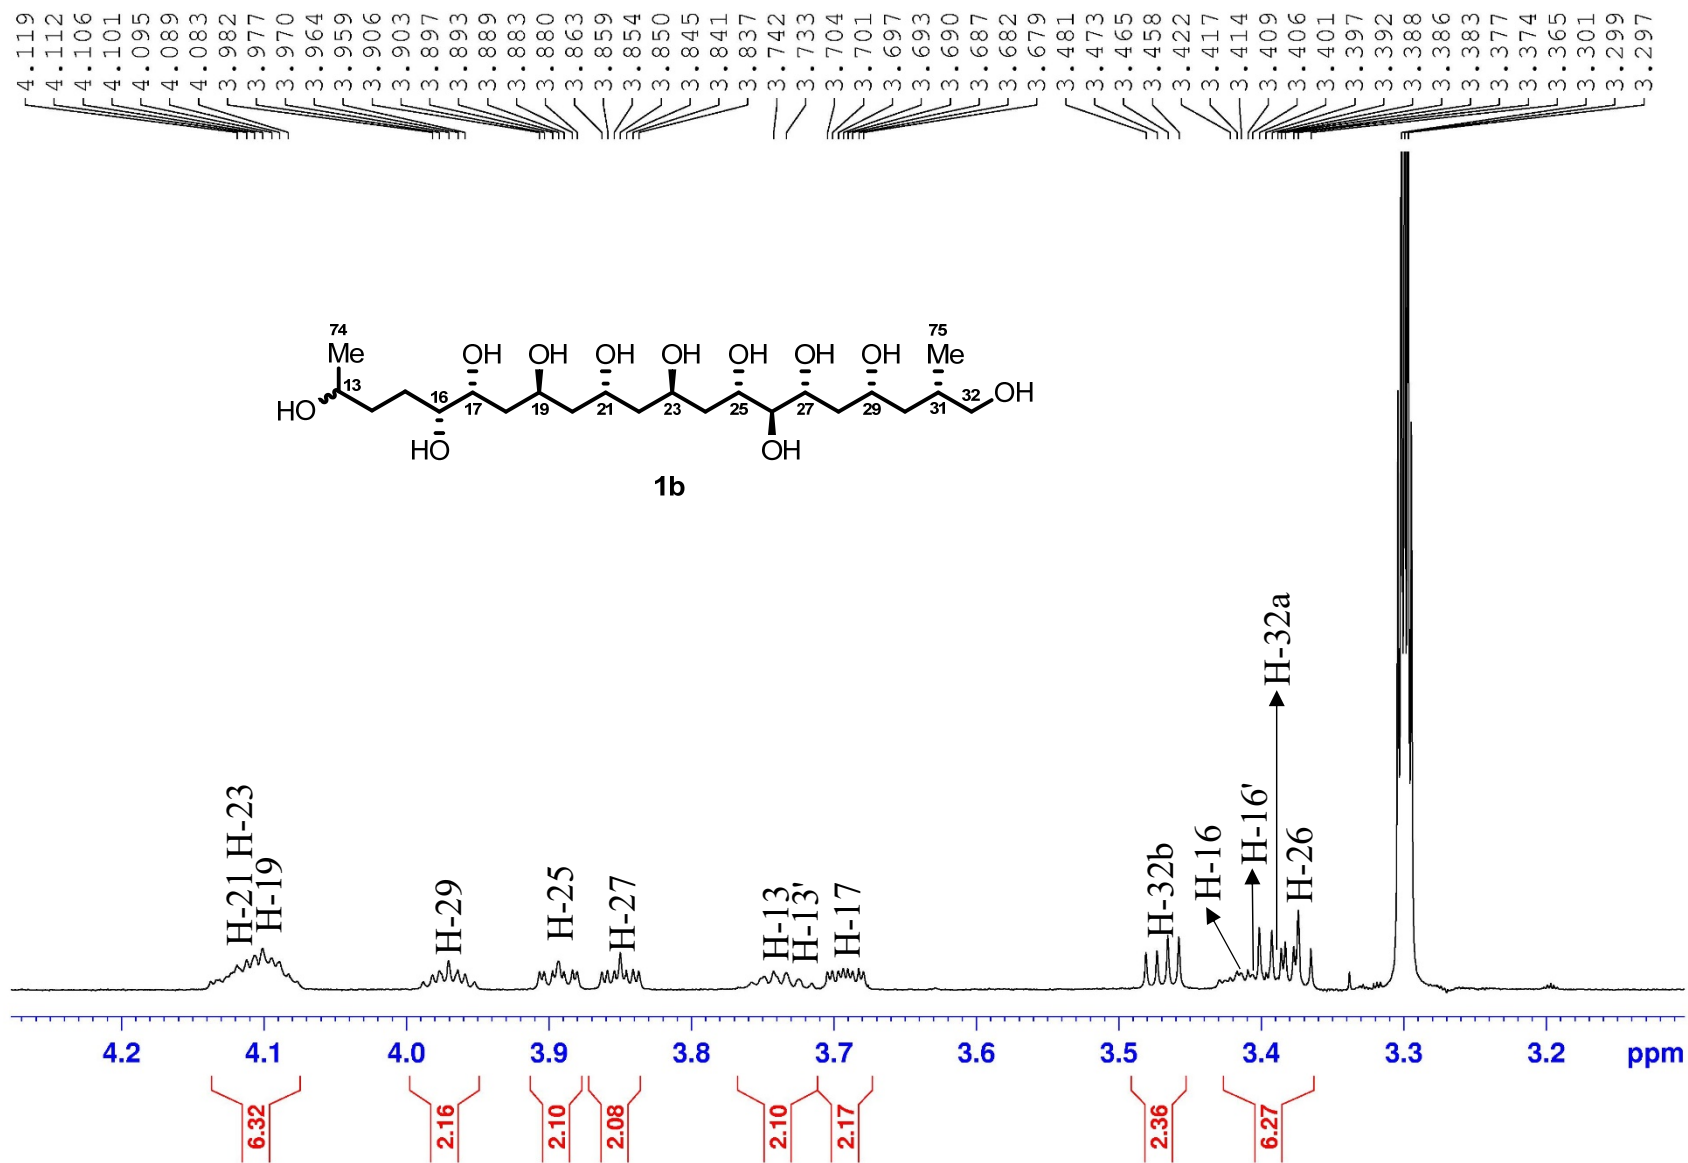

$^1\text{H}$  (700 MHz) NMR spectrum of the fragment **1b** in  $\text{CD}_3\text{OD}$

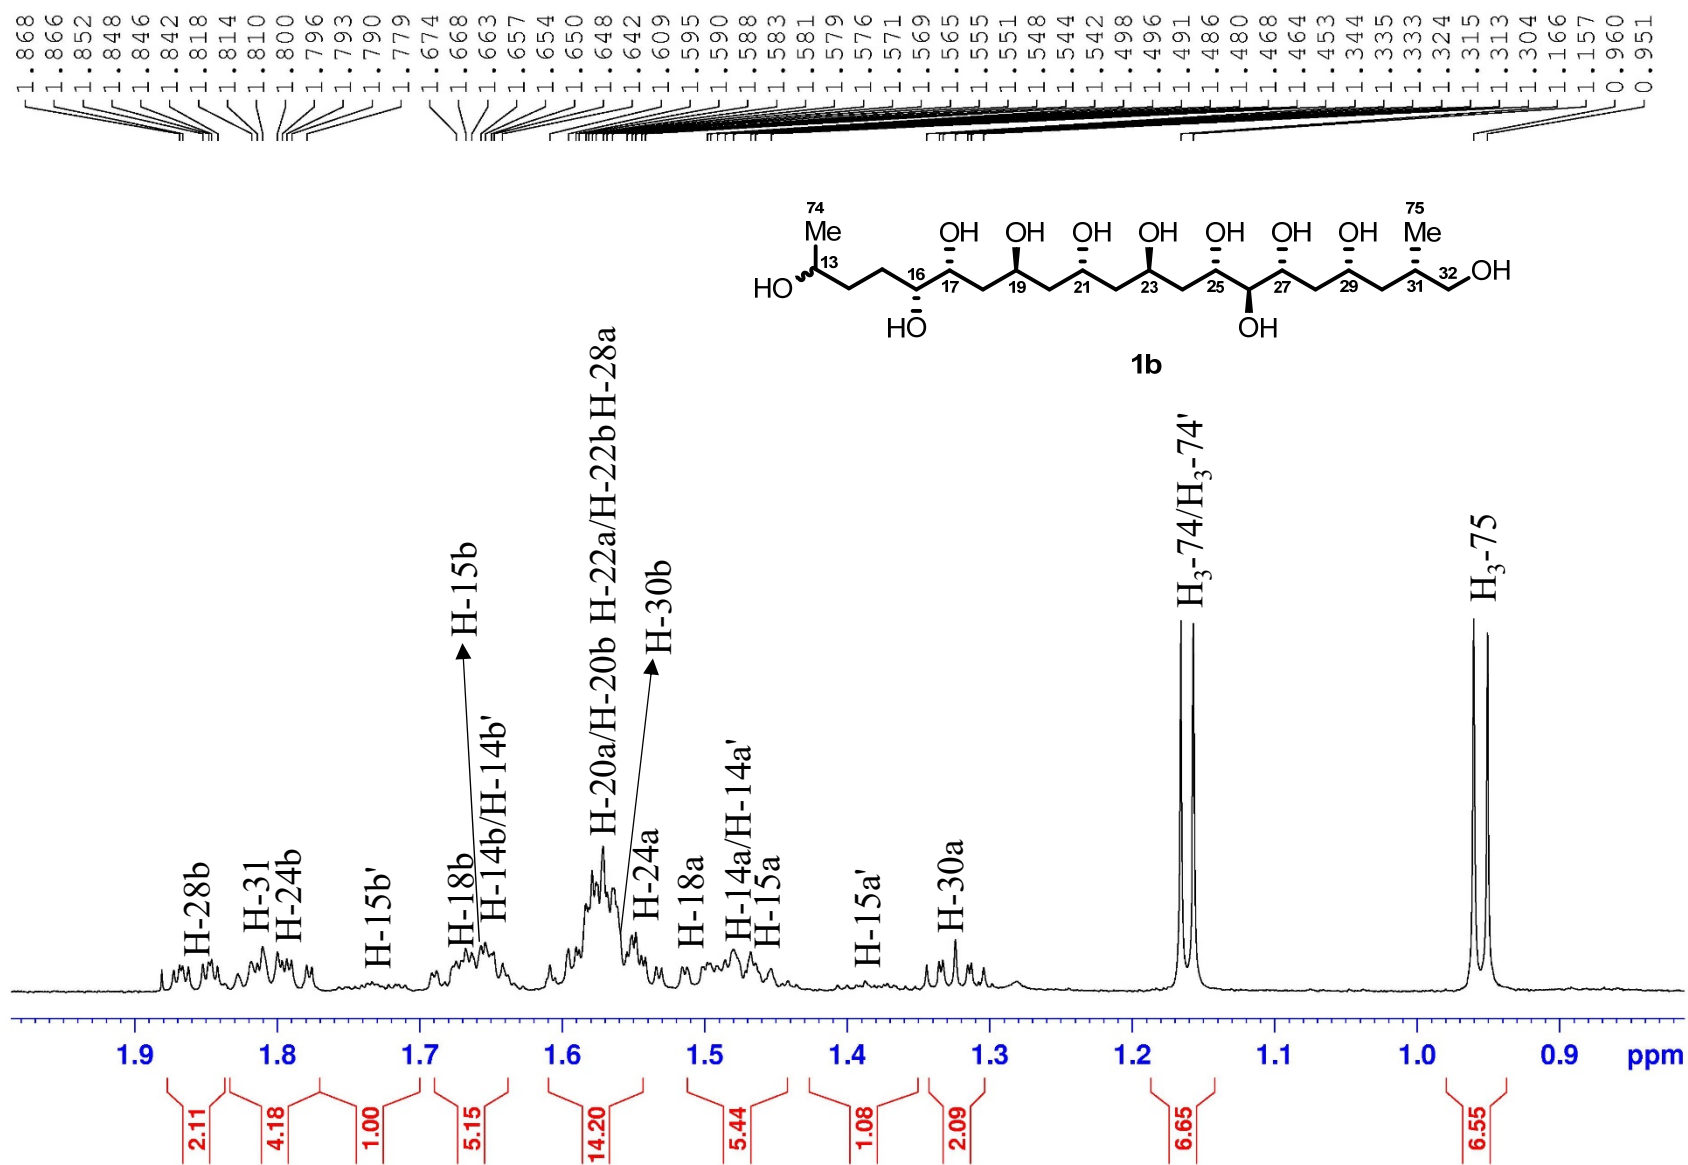



$^{13}\text{C}$  (175 MHz) NMR spectrum of the fragment **1b** in  $\text{CD}_3\text{OD}$

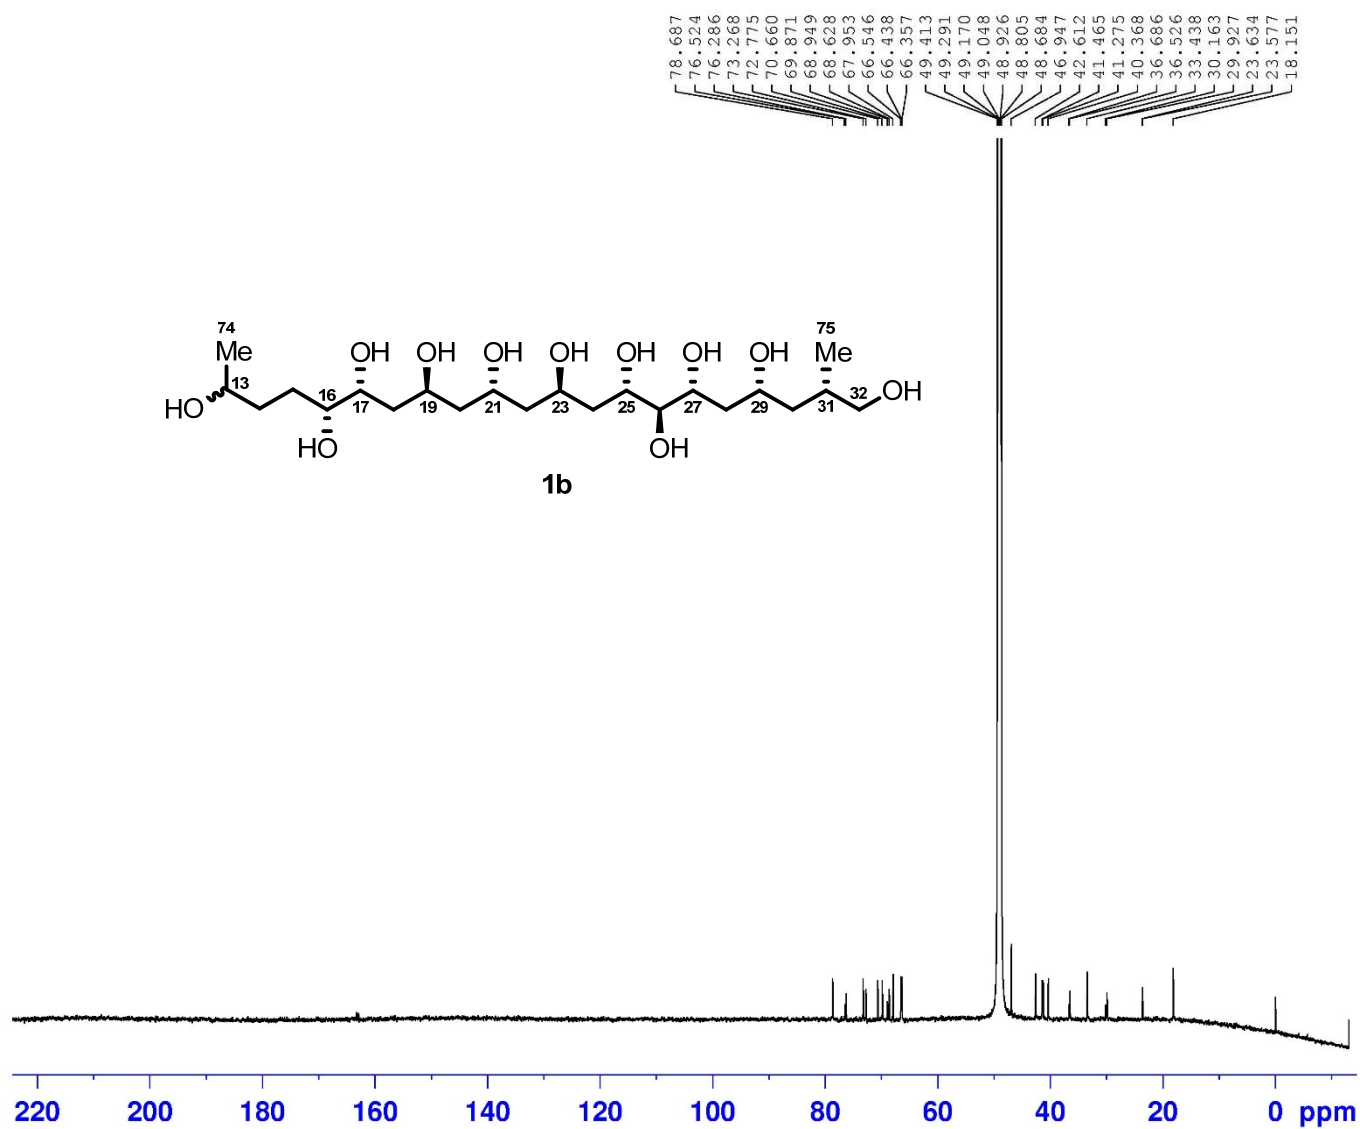

```

NAME      liwanshan-40-2-2-0
EXPNO     20
PROCNO    1
Date_     20200321
Time      5.36 h
INSTRUM   spect
PROBHD    Z120187_0028 (
PULPROG   zgpg30
TD         32768
SOLVENT   MeOD
NS         10000
DS         8
SWH        43859.648 Hz
FIDRES     2.676980 Hz
AQ         0.3736052 sec
RG         181.26
DW         11.400 use
DE         18.00 use
TE         298.0 K
D1         1.00000000 sec
D11        0.03000000 sec
TD0        1
SFO1       176.0797677 MHz
NUC1       13C
P1         11.90 use
SI         32768
SF         176.0601446 MHz
WDW        EM
SSB        0
LB         5.00 Hz
GB         0
PC         1.40
    
```

$^{13}\text{C}$  (175 MHz) NMR spectrum of the fragment **1b** in  $\text{CD}_3\text{OD}$

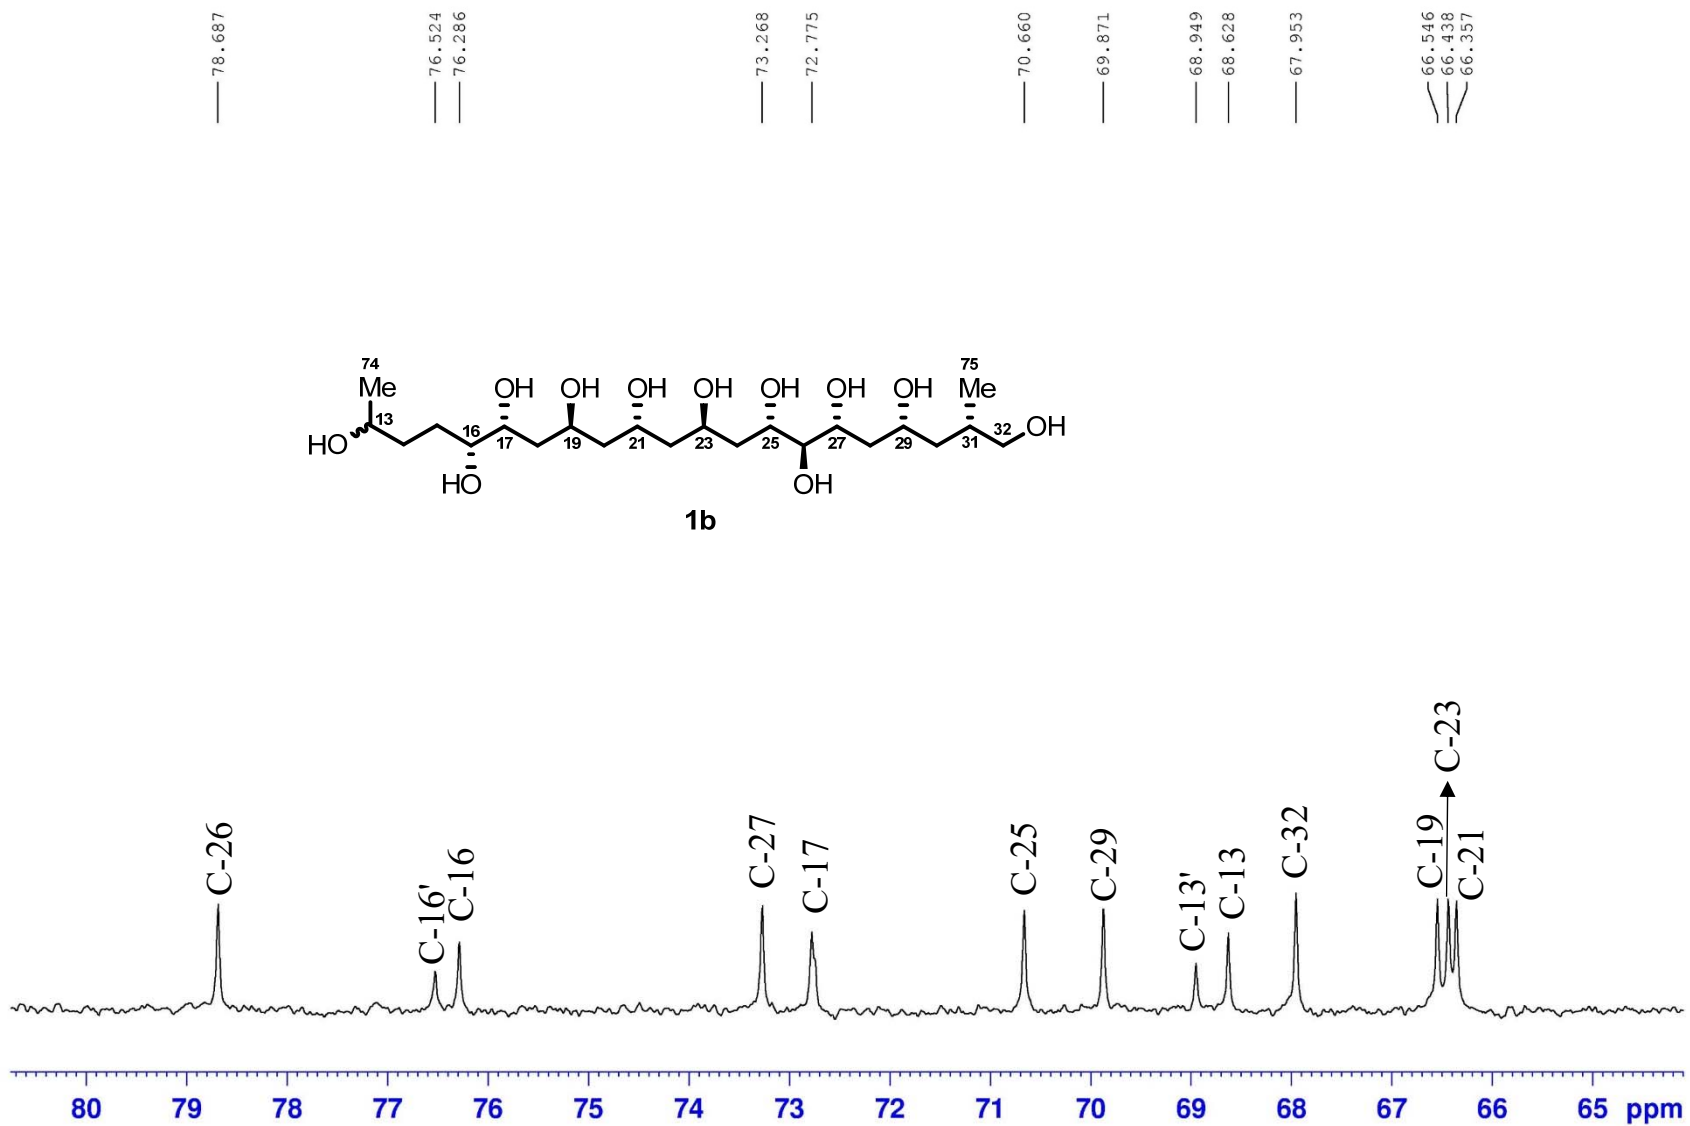

$^{13}\text{C}$  (175 MHz) NMR spectrum of the fragment **1b** in  $\text{CD}_3\text{OD}$

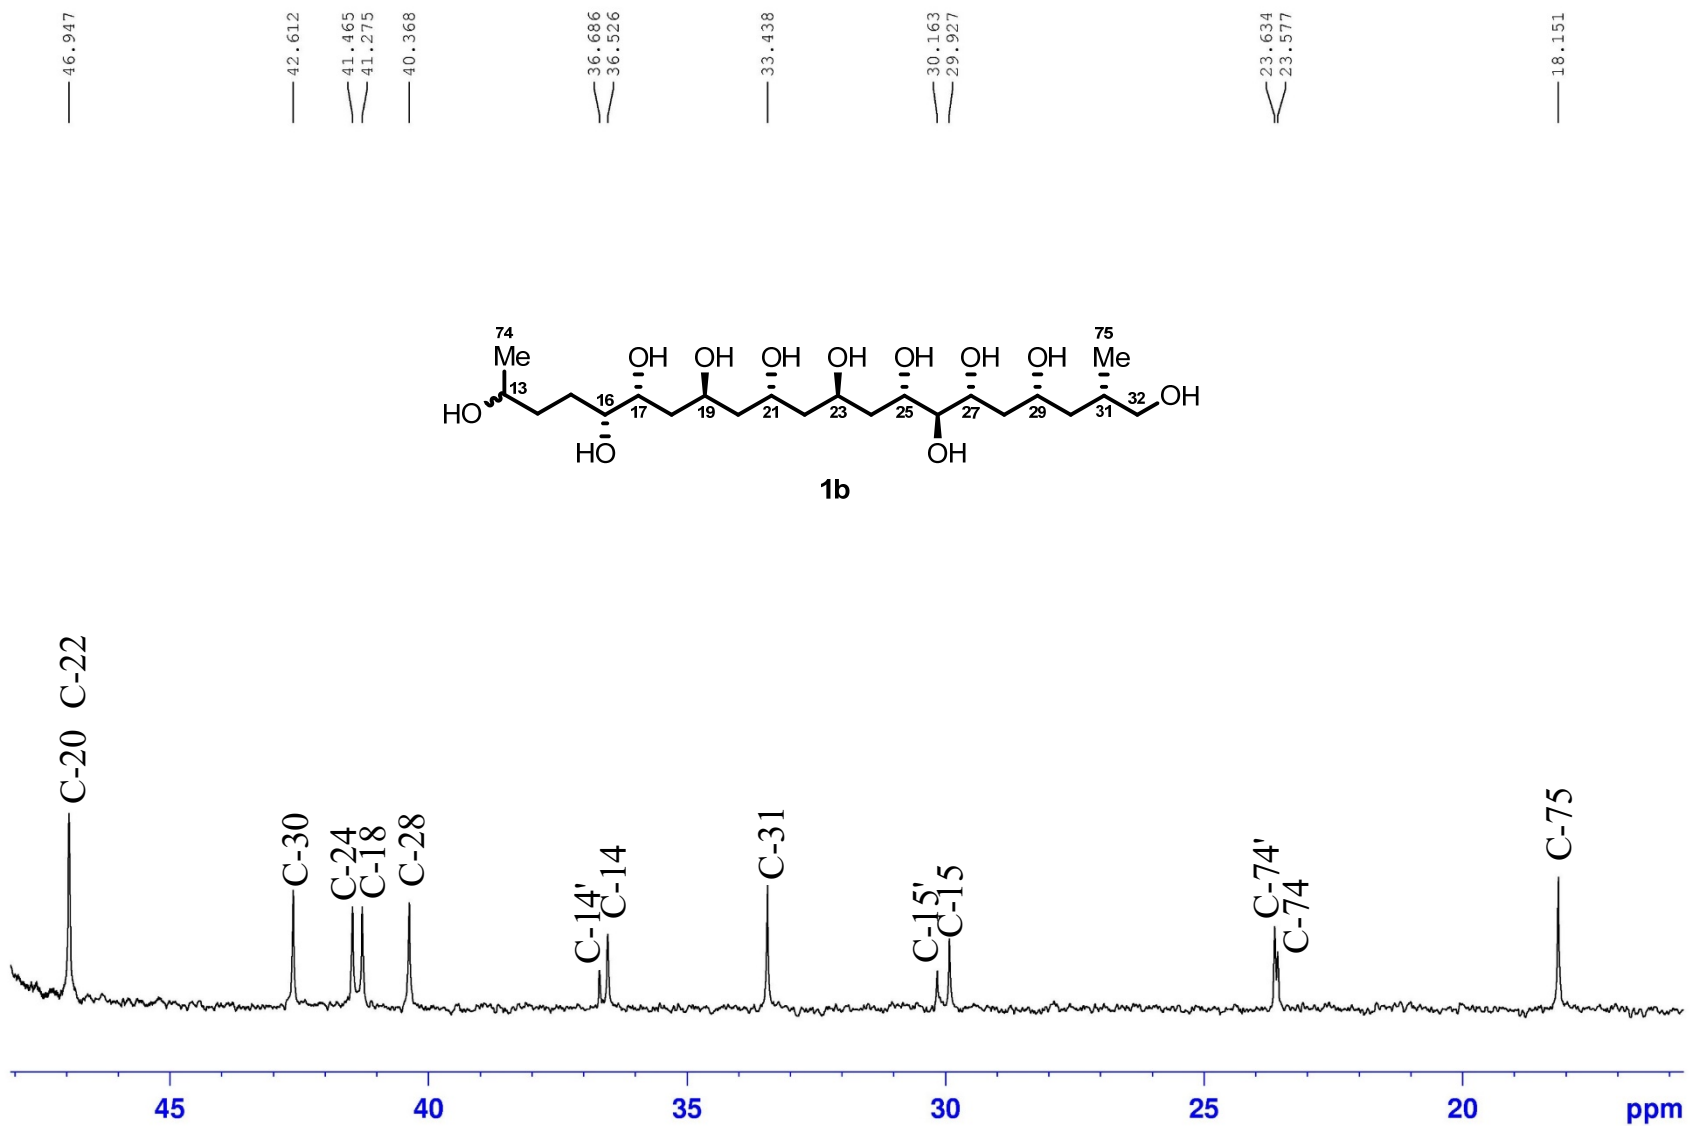

# DEPT135 (175 MHz) spectrum of the fragment **1b** in CD<sub>3</sub>OD

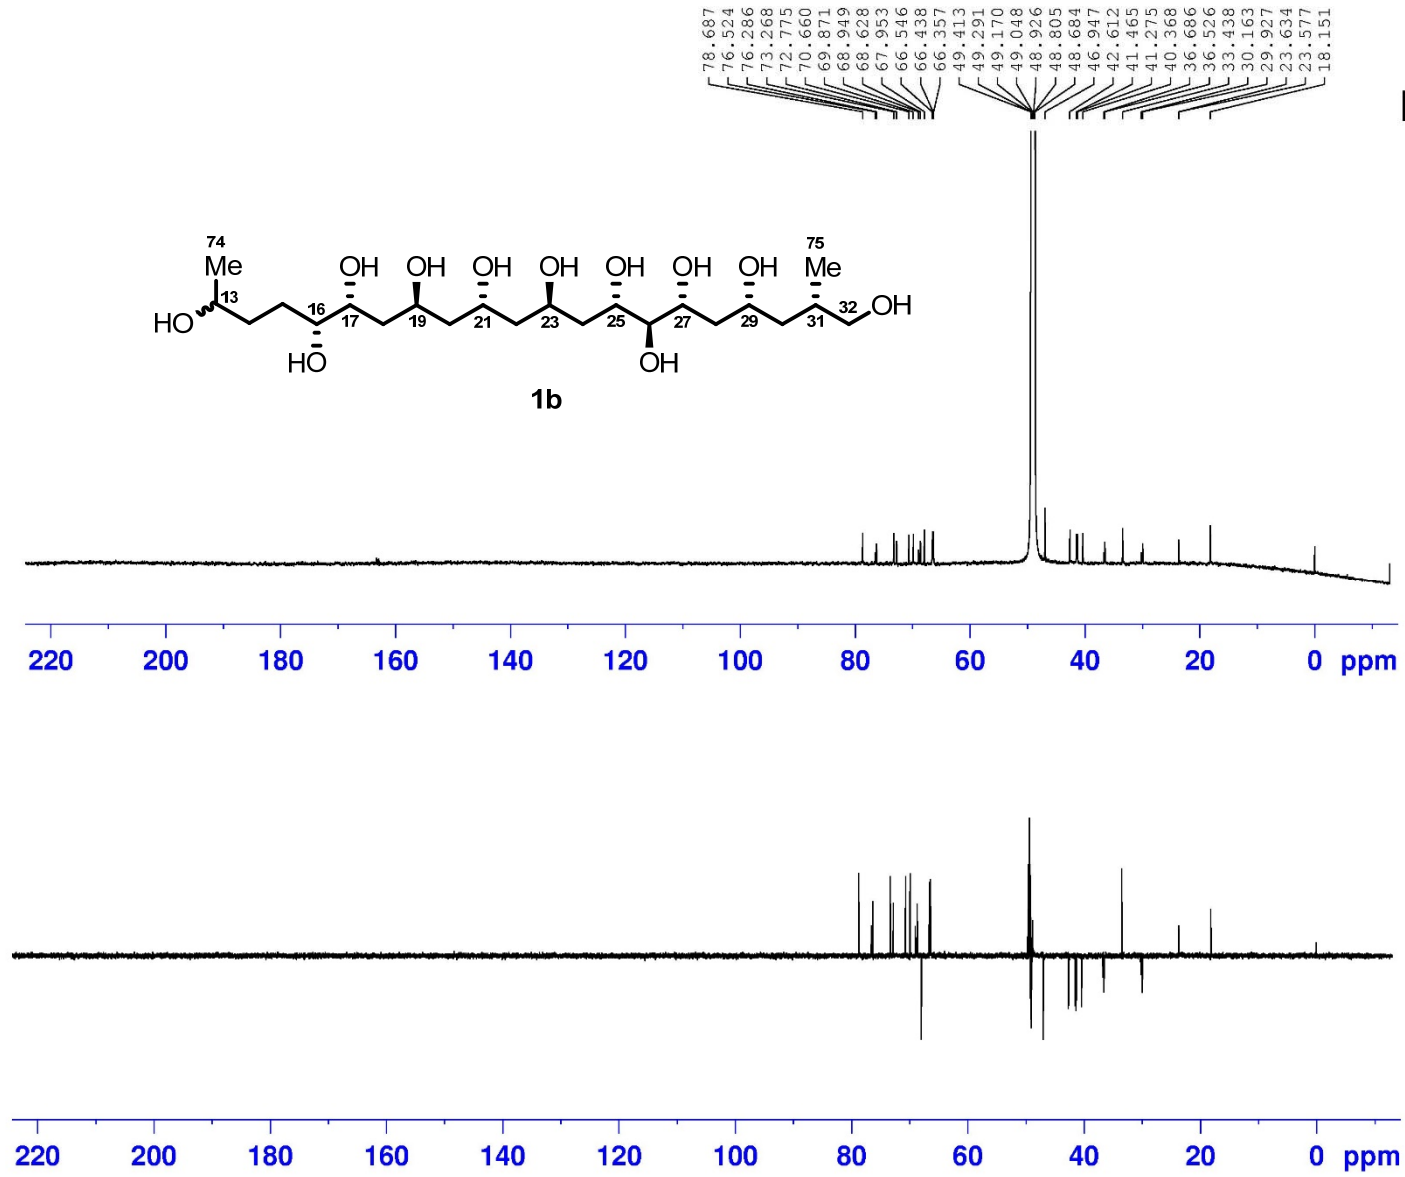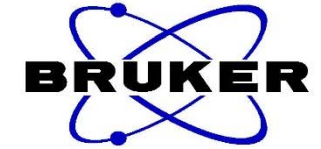

```

NAME      liwanshan-40-2-2-
EXPNO     21
PROCNO    1
Date_     20200321
Time      7.12 h
INSTRUM   spect
PROBHD    Z120187_0028 (
PULPROG   deptsp135
TD         32768
SOLVENT   MeOD
NS         4000
DS         8
SWH        43859.648 Hz
FIDRES     2.676980 Hz
AQ         0.3736052 s
RG         181.26
DW         11.400 us
DE         18.00 us
TE         298.0 K
CNST2     145.0000000
D1         1.00000000 s
D2         0.00344828 s
D12        0.00002000 s
TD0        1
SFO1       176.0797677 MF
NUC1       13C
P1         11.90 us
P13        2000.00 us
SI         32768
SF         176.0601437 MF
WDW        EM
SSB        0
LB         1.00 Hz
GB         0
PC         1.40
    
```

# DEPT135 (175 MHz) spectrum of the fragment **1b** in CD<sub>3</sub>OD

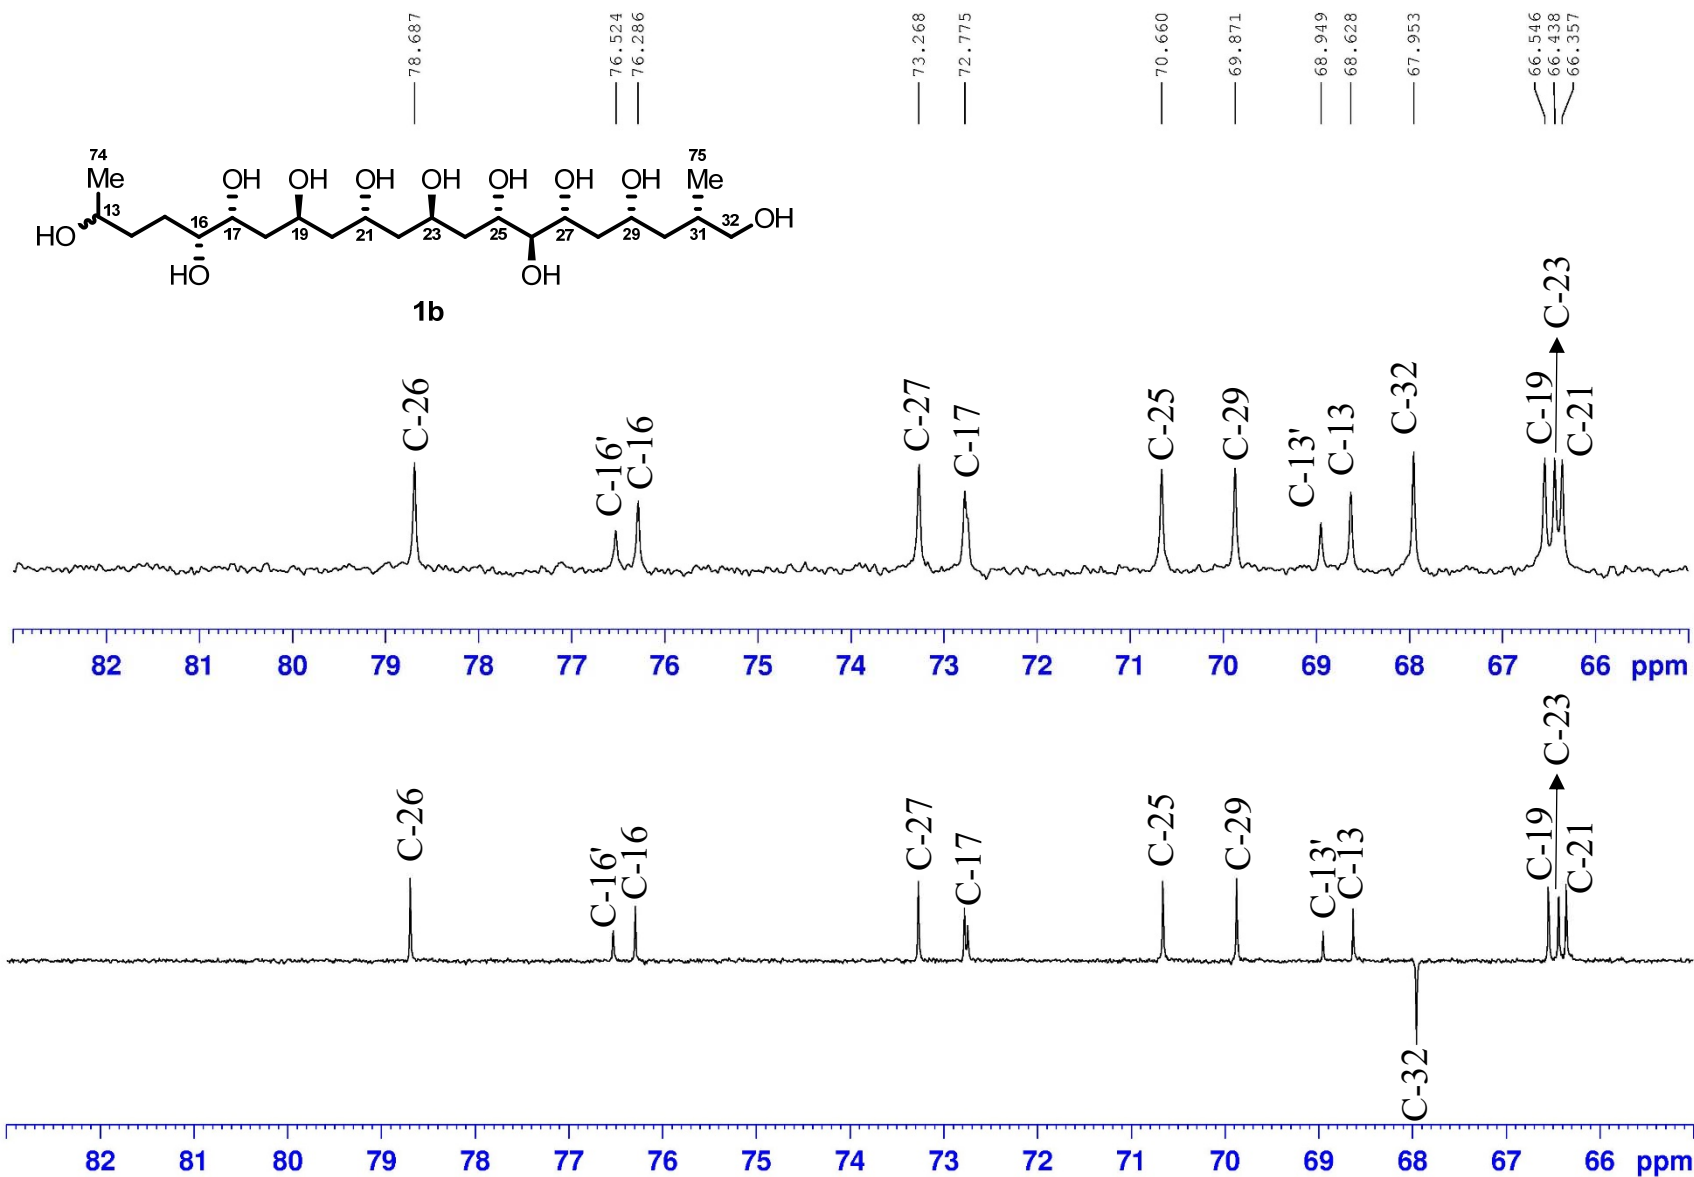

# DEPT135 (175 MHz) spectrum of the fragment **1b** in CD<sub>3</sub>OD

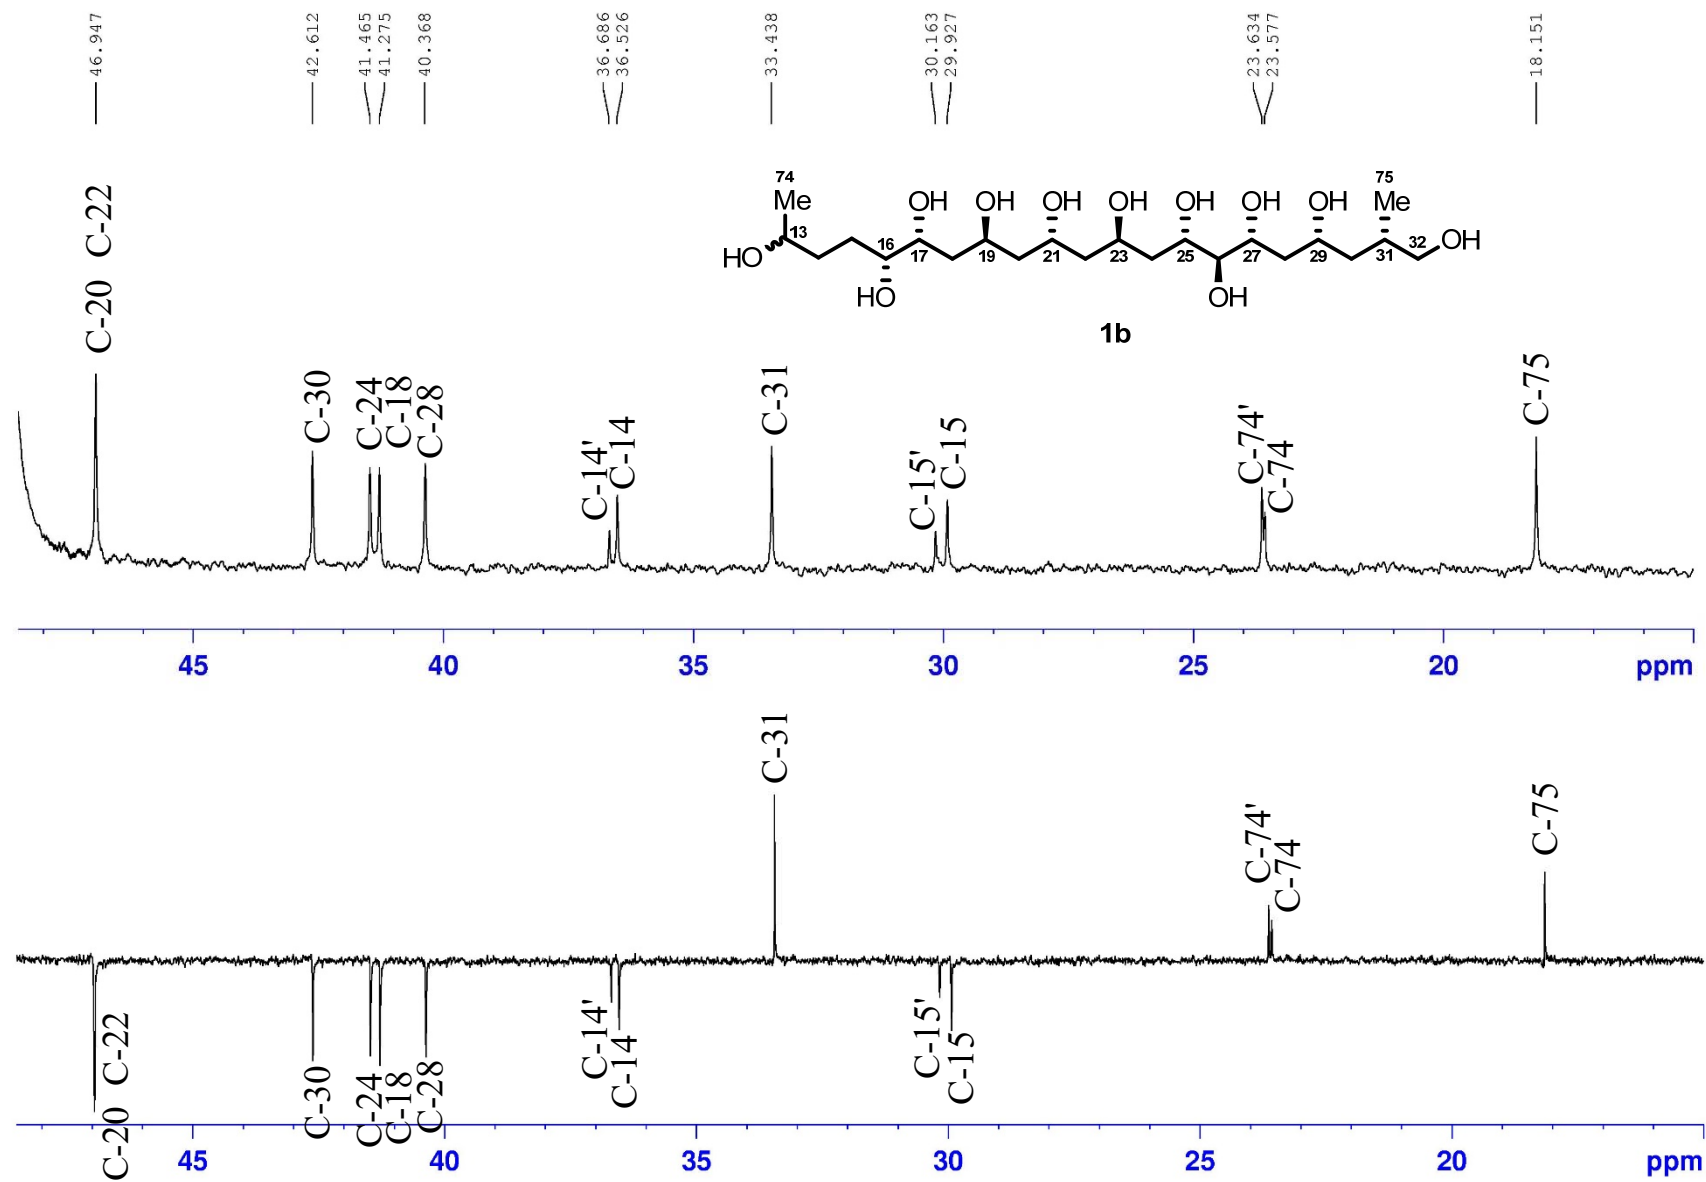

# $^1\text{H}$ - $^1\text{H}$ COSY (700 MHz) spectrum of the fragment **1b** in $\text{CD}_3\text{OD}$

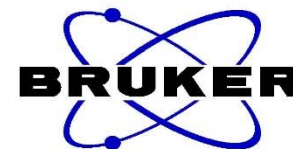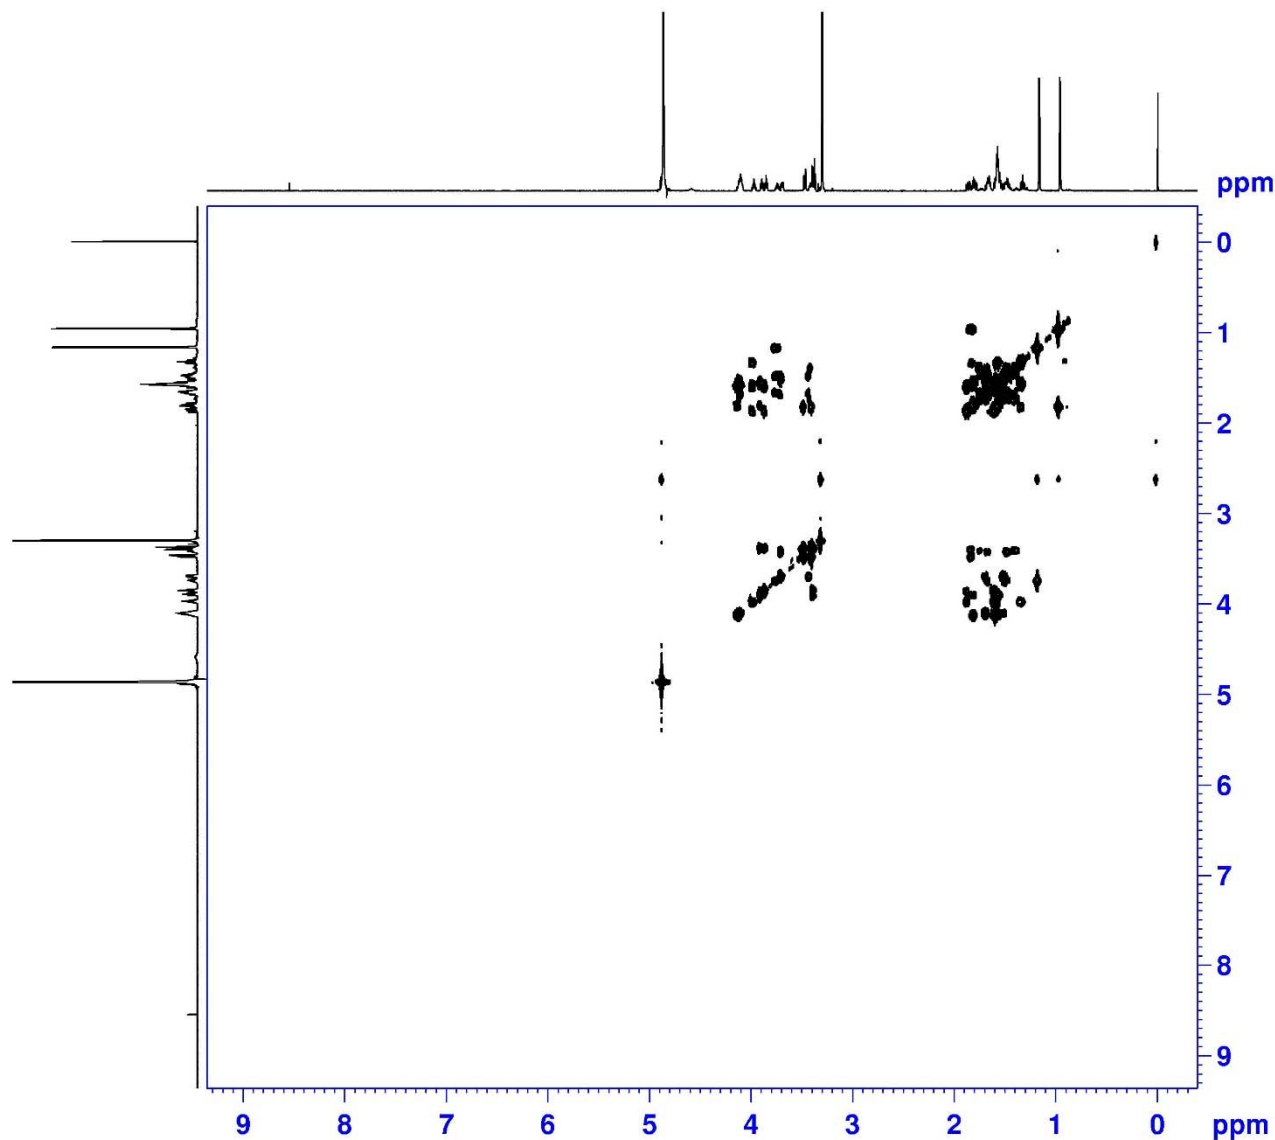

```
NAME      liwanshan-40-2-2-03-2
EXPNO     16
PROCNO    1
Date_     20200321
Time      7.14 h
INSTRUM   spect
PROBHD    z120187_0028 (
PULPROG   cosygpmfzf
TD        2048
SOLVENT   MeOD
NS        32
DS        16
SWH       4347.826 Hz
FIDRES    4.245924 Hz
AQ        0.2355700 sec
RG        181.26
DW        115.000 usec
DE        10.00 usec
TE        298.0 K
D0        0.00000300 sec
D1        1.00000000 sec
D13       0.00000400 sec
D16       0.00020000 sec
IN0       0.00023000 sec
ND0       1
TD        128
SFO1      700.1819 MHz
FIDRES    33.967392 Hz
SW        6.210 ppm
FnMODE    QF
SI        1024
SF        700.1800165 MHz
WDW       SINE
SSB       0
LB        0.00 Hz
GB        0
PC        1.40
ST        1024
MC2       QF
SF        700.1800165 MHz
WDW       SINE
SSB       0
LB        0.00 Hz
GB        0
```

$^1\text{H}$ - $^1\text{H}$  COSY (700 MHz) spectrum of the fragment **1b** in  $\text{CD}_3\text{OD}$

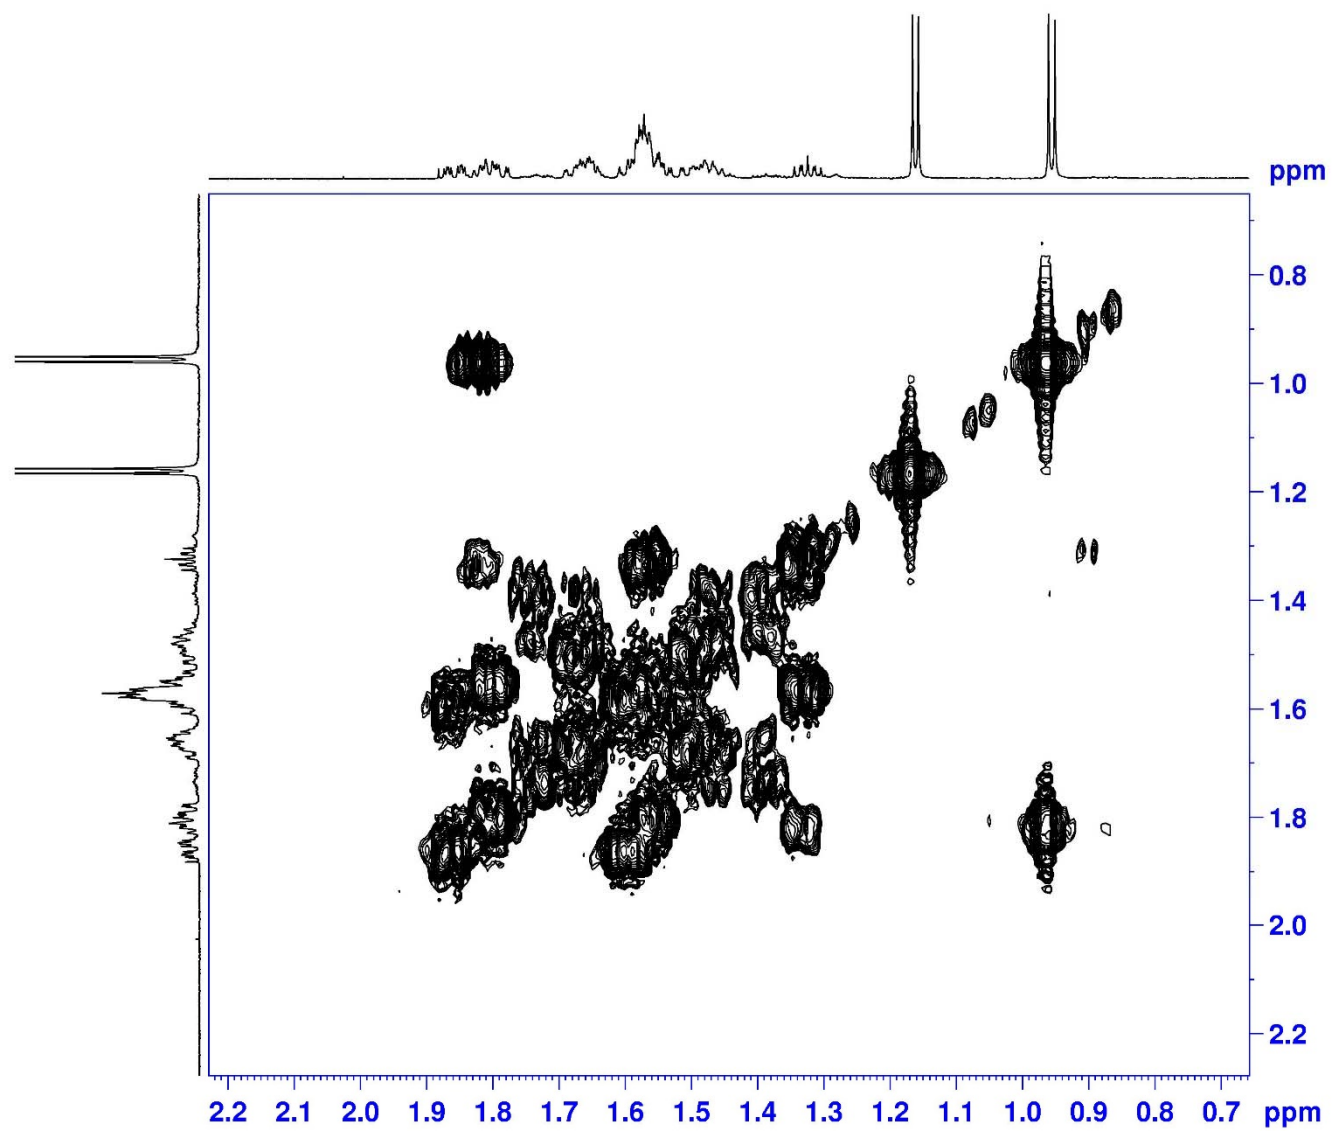



$^1\text{H}$ - $^1\text{H}$  COSY (700 MHz) spectrum of the fragment **1b** in  $\text{CD}_3\text{OD}$

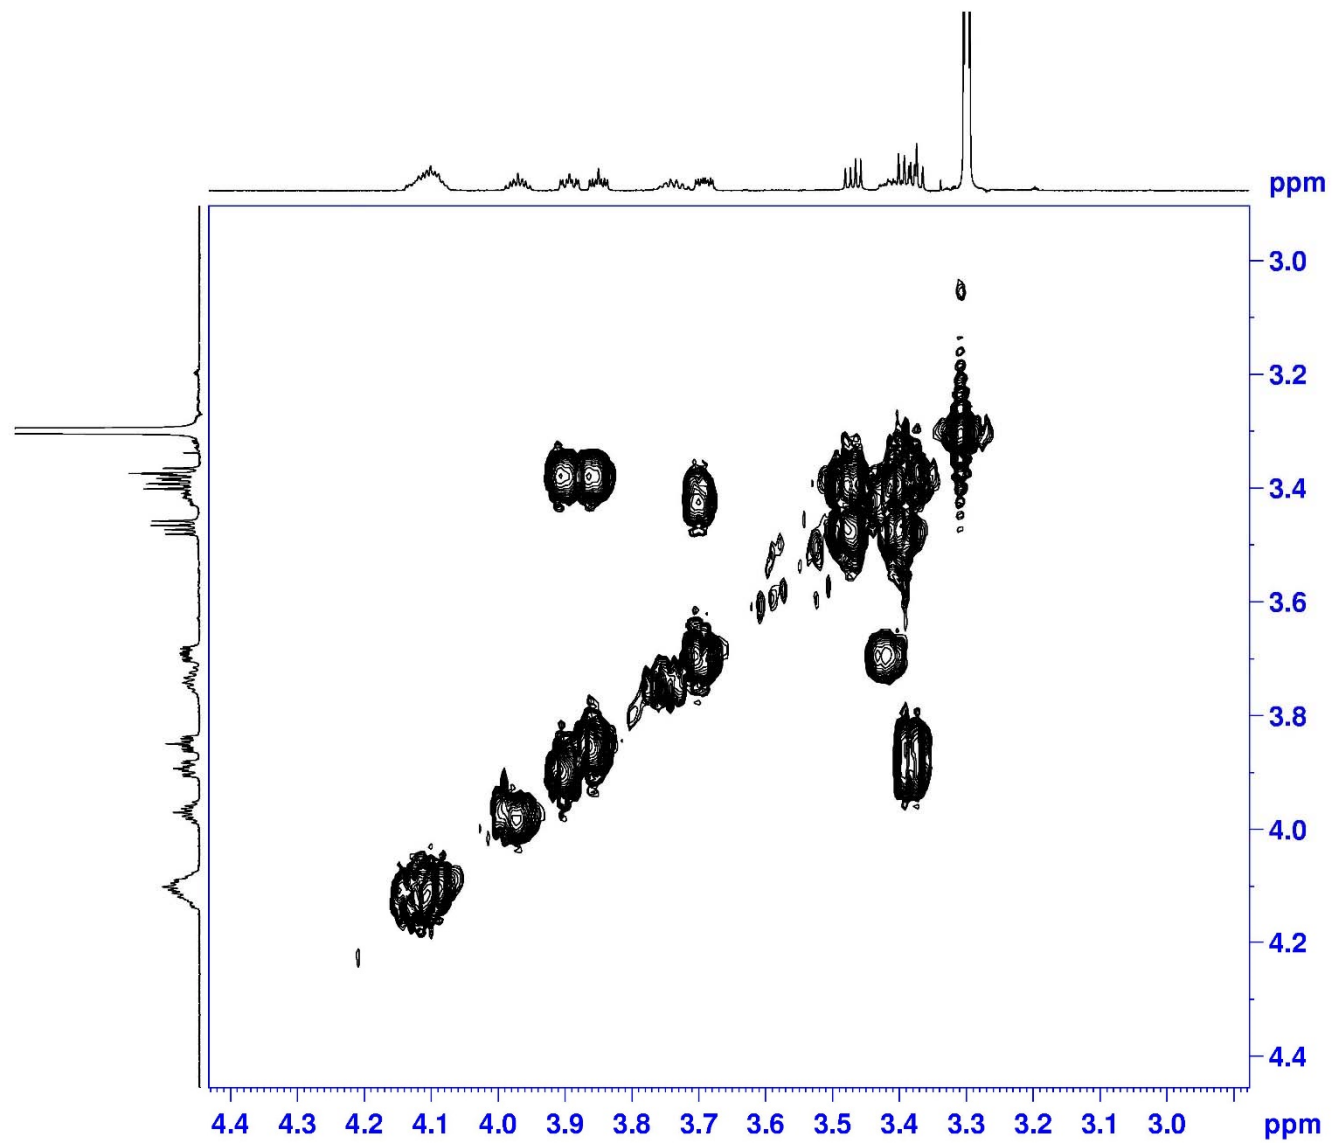

$^1\text{H}$ - $^1\text{H}$  COSY (700 MHz) spectrum of the fragment **1b** in  $\text{CD}_3\text{OD}$

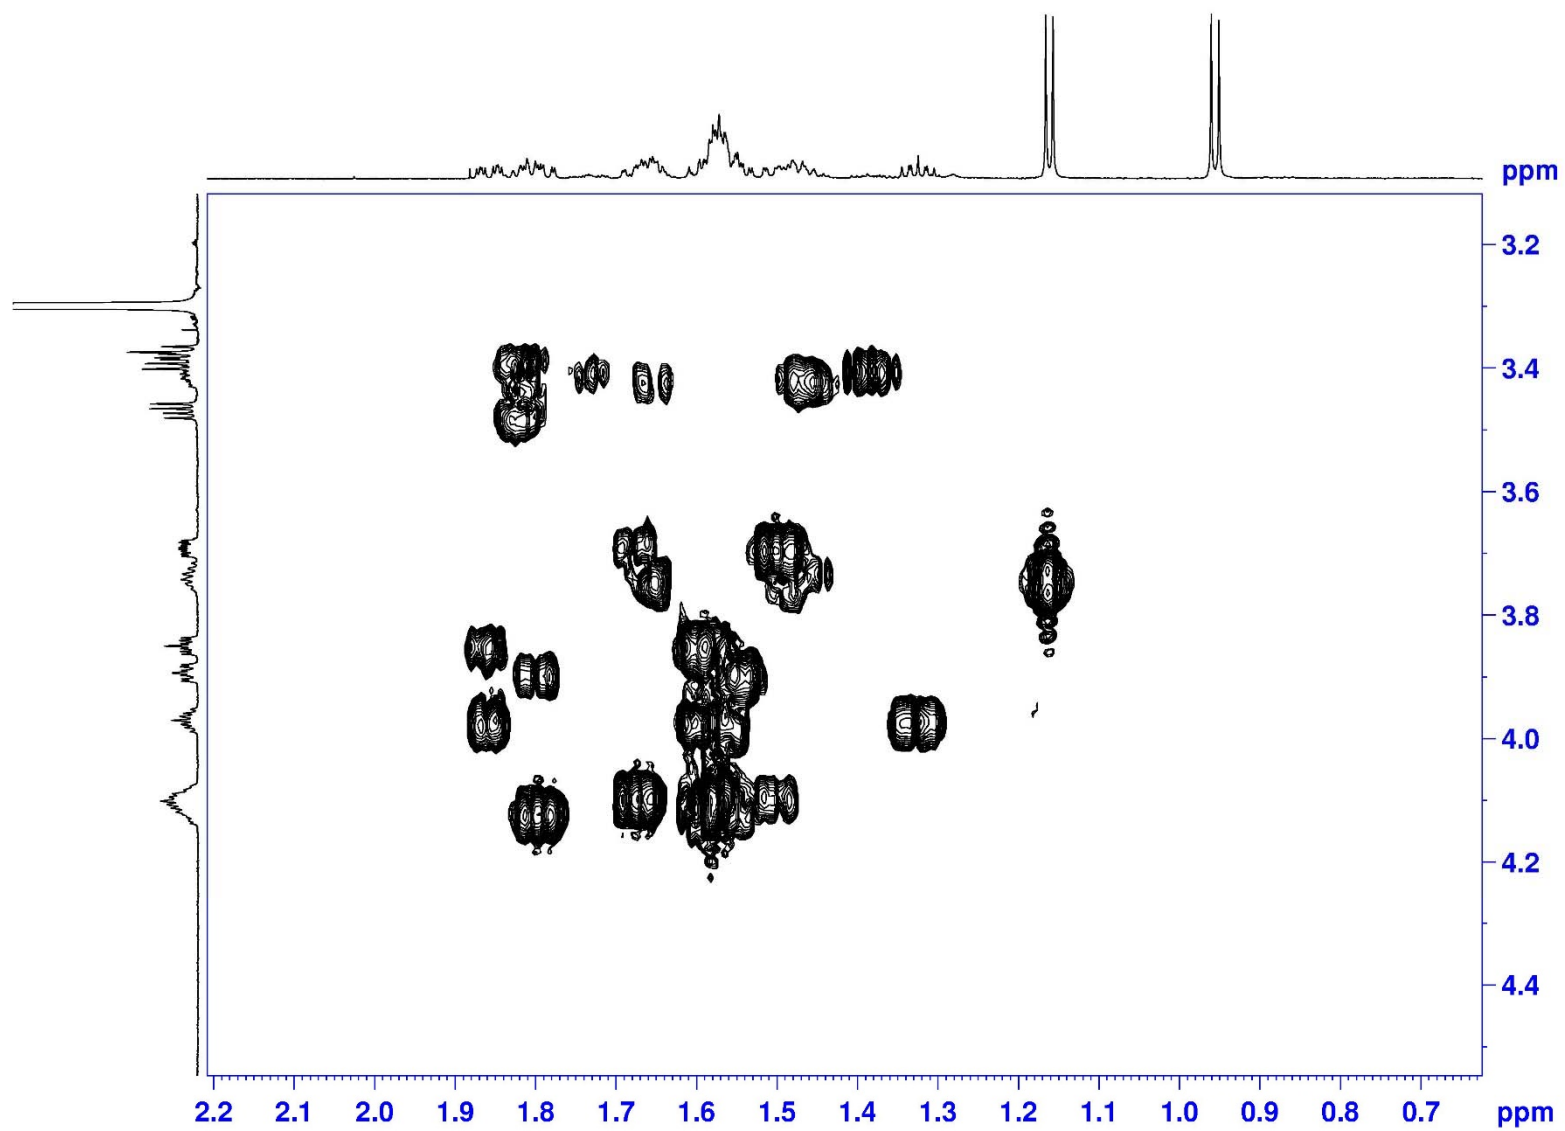

# HSQC (700 MHz) spectrum of the fragment **1b** in CD<sub>3</sub>OD

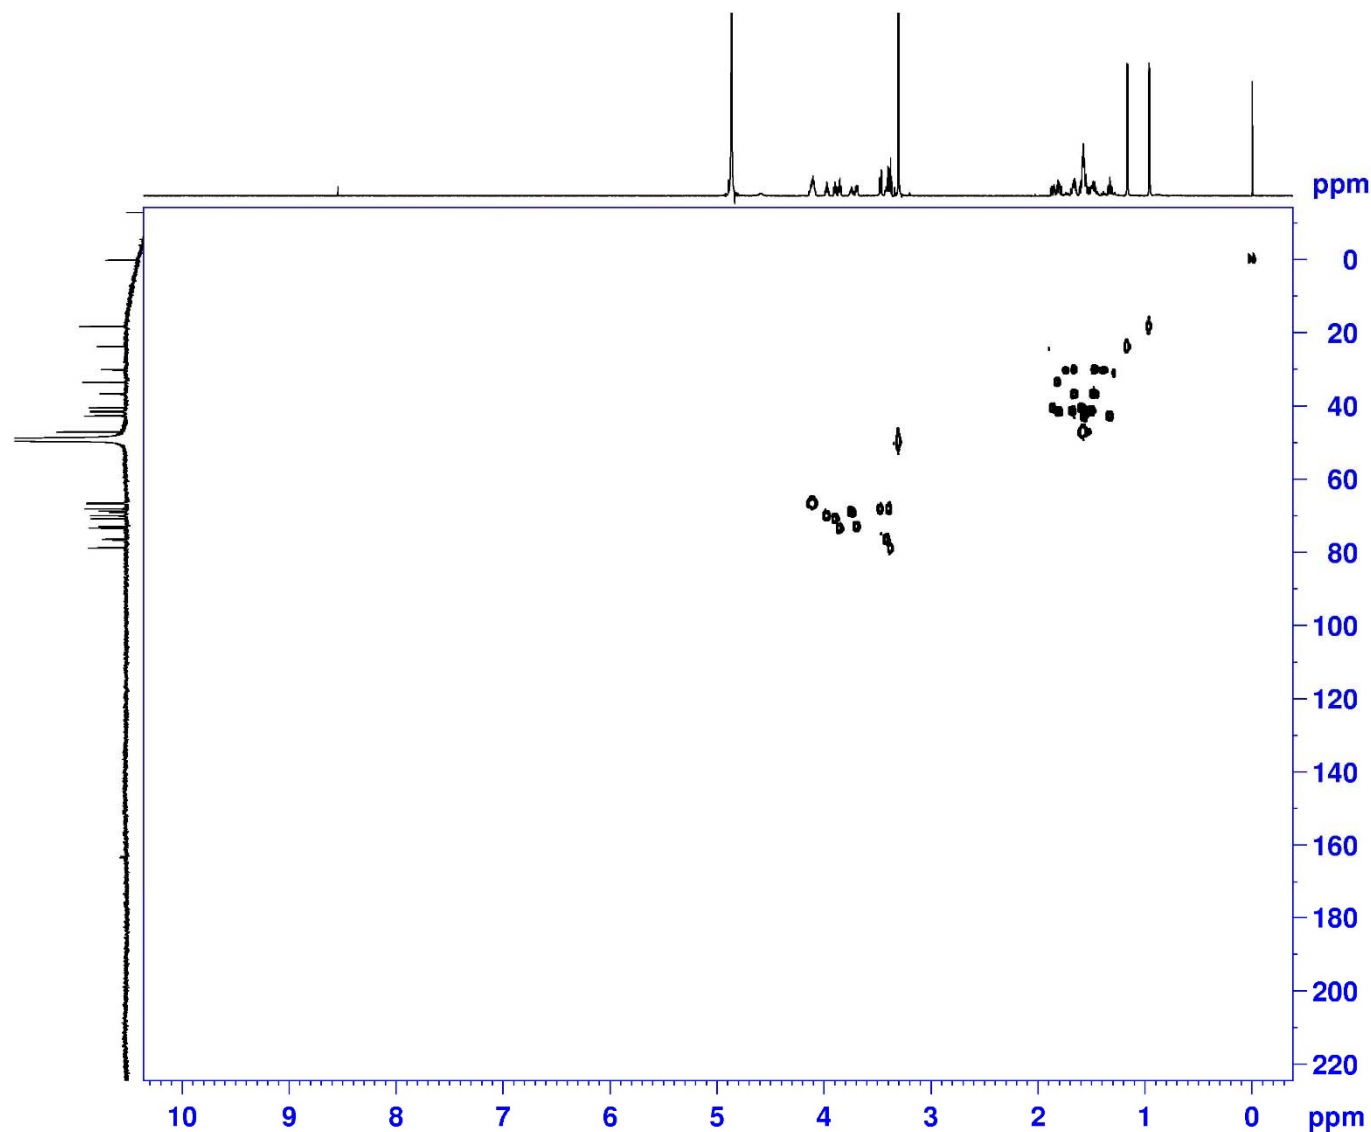

|         |                   |
|---------|-------------------|
| NAME    | liwanshan-40-2-2- |
| EXPNO   | 17                |
| PROCNO  | 1                 |
| Date_   | 20200321          |
| Time    | 8.42 h            |
| INSTRUM | spect             |
| PROBHD  | Z120187_0028 (    |
| PULPROG | hsqcetgp          |
| TD      | 2048              |
| SOLVENT | MeOD              |
| NS      | 48                |
| DS      | 16                |
| SWH     | 5122.951 Hz       |
| FIDRES  | 5.002882 Hz       |
| AQ      | 0.1999348 se      |
| RG      | 181.26            |
| DW      | 97.600 us         |
| DE      | 10.00 us          |
| TE      | 298.0 K           |
| CNST2   | 145.0000000       |
| D0      | 0.0000300 se      |
| D1      | 1.5000000 se      |
| D4      | 0.00172414 se     |
| D11     | 0.0300000 se      |
| D16     | 0.0002000 se      |
| IN0     | 0.00001630 se     |
| ND0     | 2                 |
| TD      | 128               |
| SFO1    | 176.0746 MH       |
| FIDRES  | 239.647232 Hz     |
| SW      | 174.215 pp        |
| FnMODE  | Echo-Antiecho     |
| SI      | 2048              |
| SF      | 700.1800213 MH    |
| WDW     | QSINE             |
| SSB     | 2                 |
| LB      | 0.00 Hz           |
| GB      | 0                 |
| PC      | 1.40              |
| SI      | 2048              |
| MC2     | echo-antiecho     |
| SF      | 176.0601446 MH    |
| WDW     | QSINE             |
| SSB     | 2                 |
| LB      | 0.00 Hz           |
| GB      | 0                 |

HSQC (700 MHz) spectrum of the fragment **1b** in CD<sub>3</sub>OD

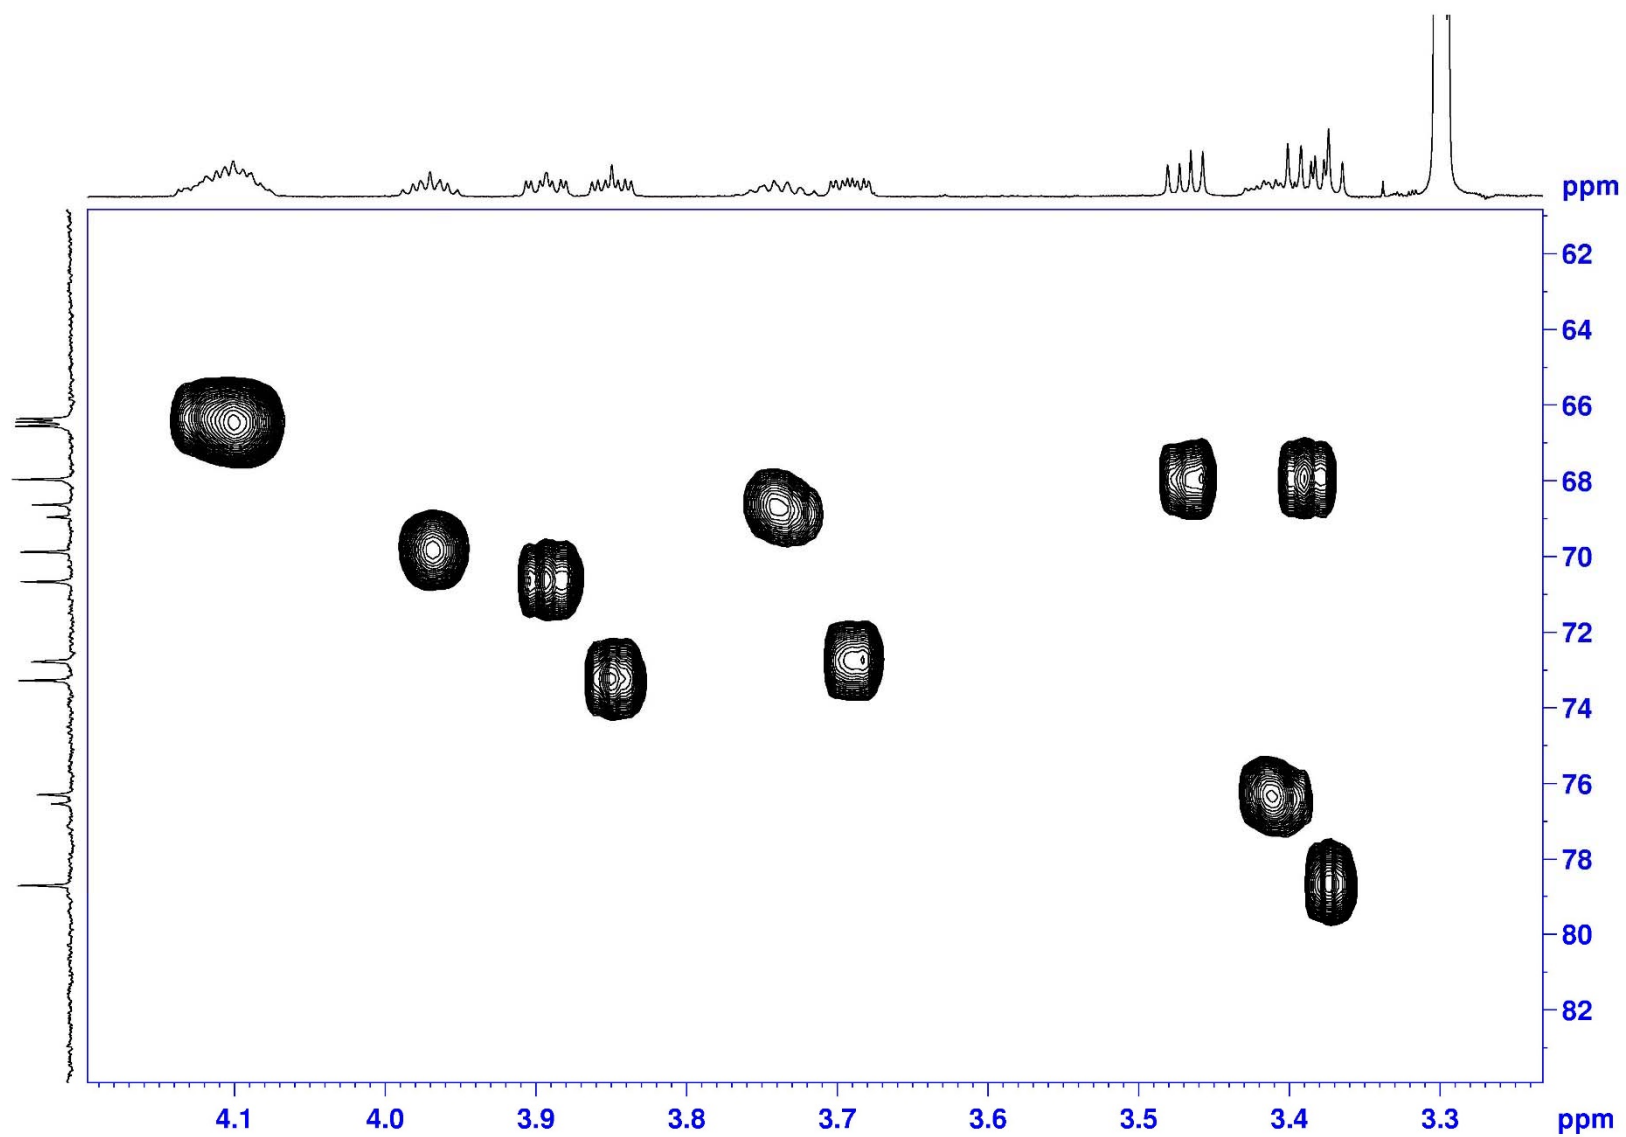

HSQC (700 MHz) spectrum of the fragment **1b** in CD<sub>3</sub>OD

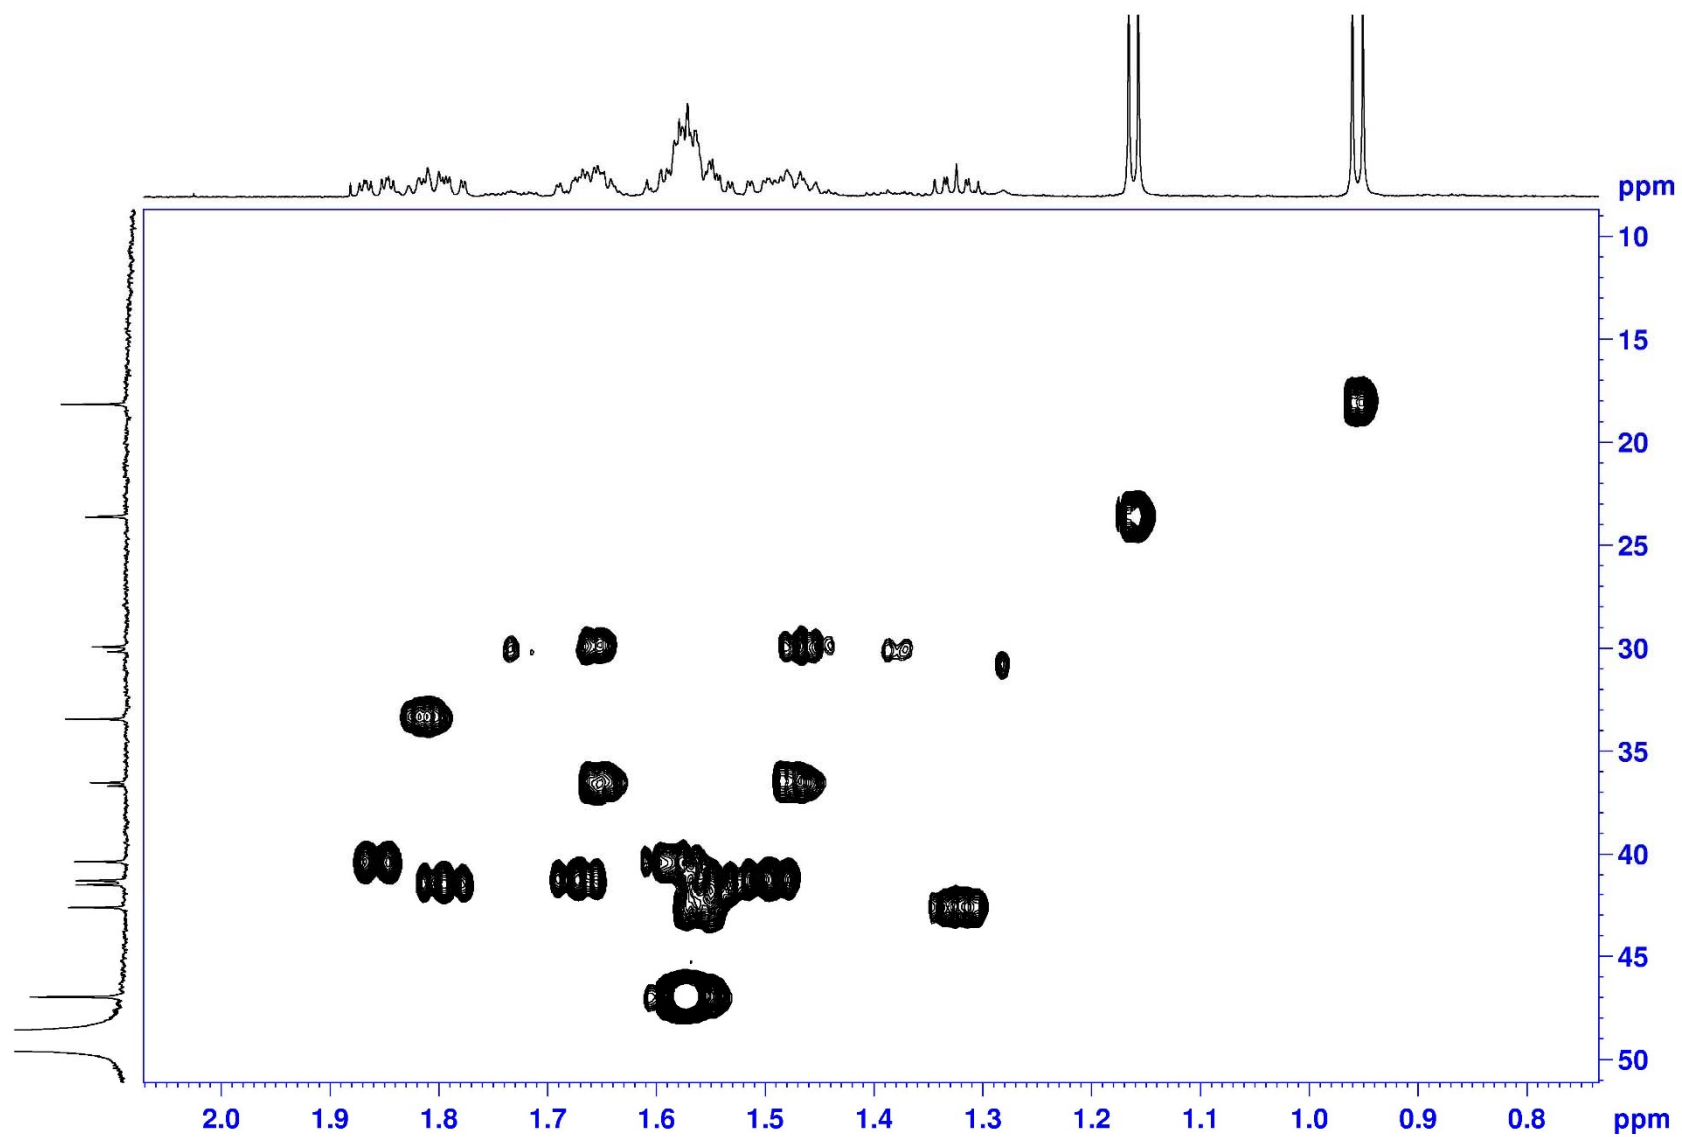

# HMBC (700 MHz) spectrum of the fragment **1b** in CD<sub>3</sub>OD

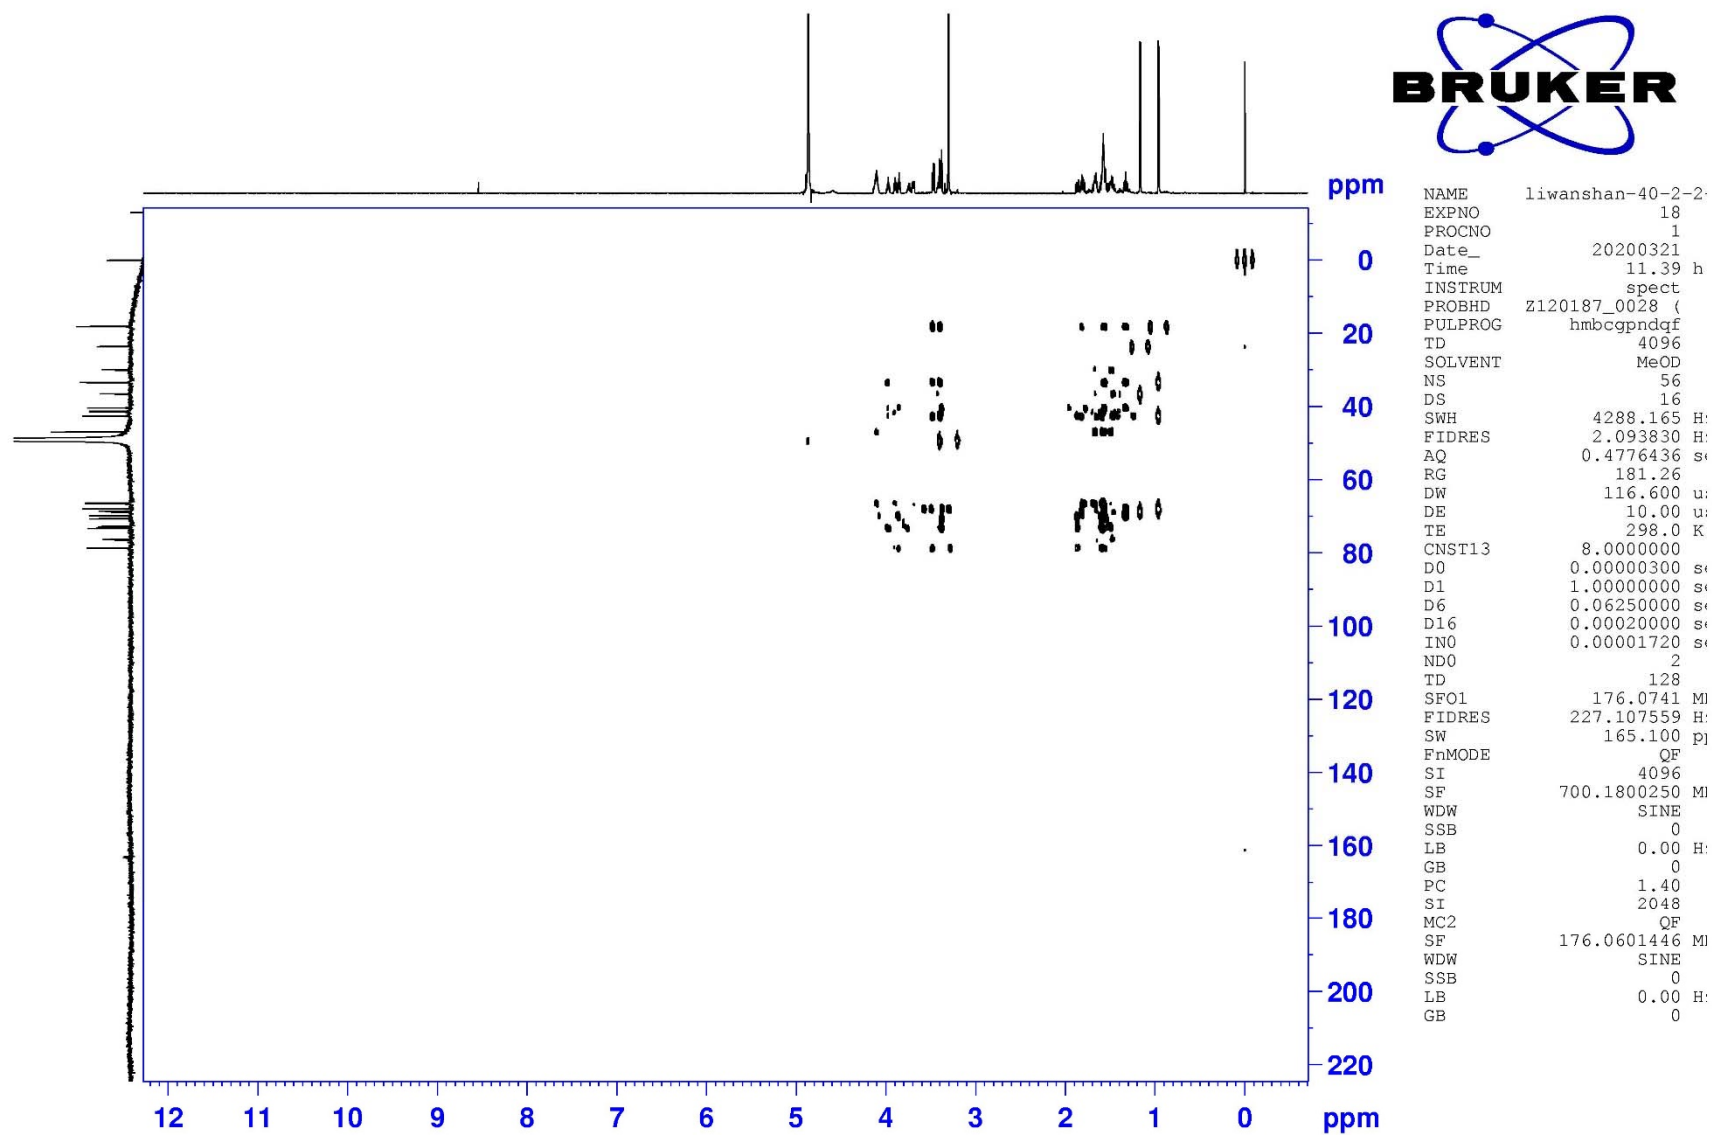

HMBC (700 MHz) spectrum of the fragment **1b** in CD<sub>3</sub>OD

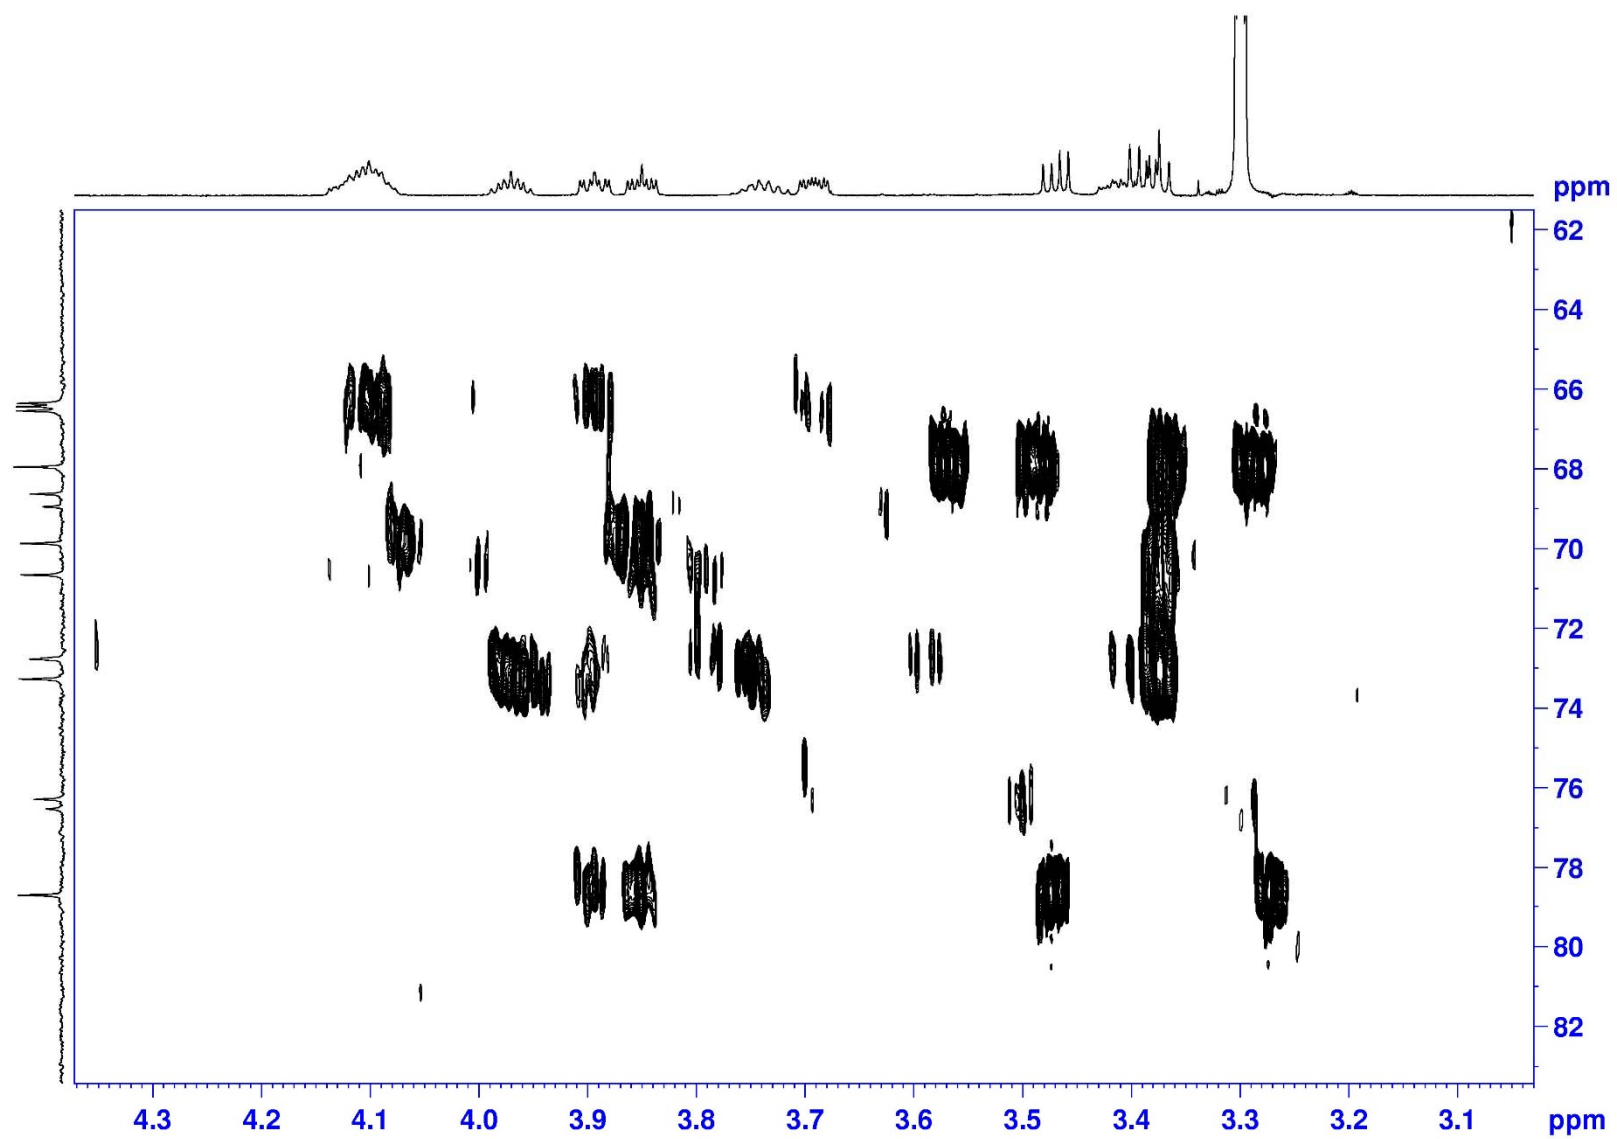

HMBC (700 MHz) spectrum of the fragment **1b** in CD<sub>3</sub>OD

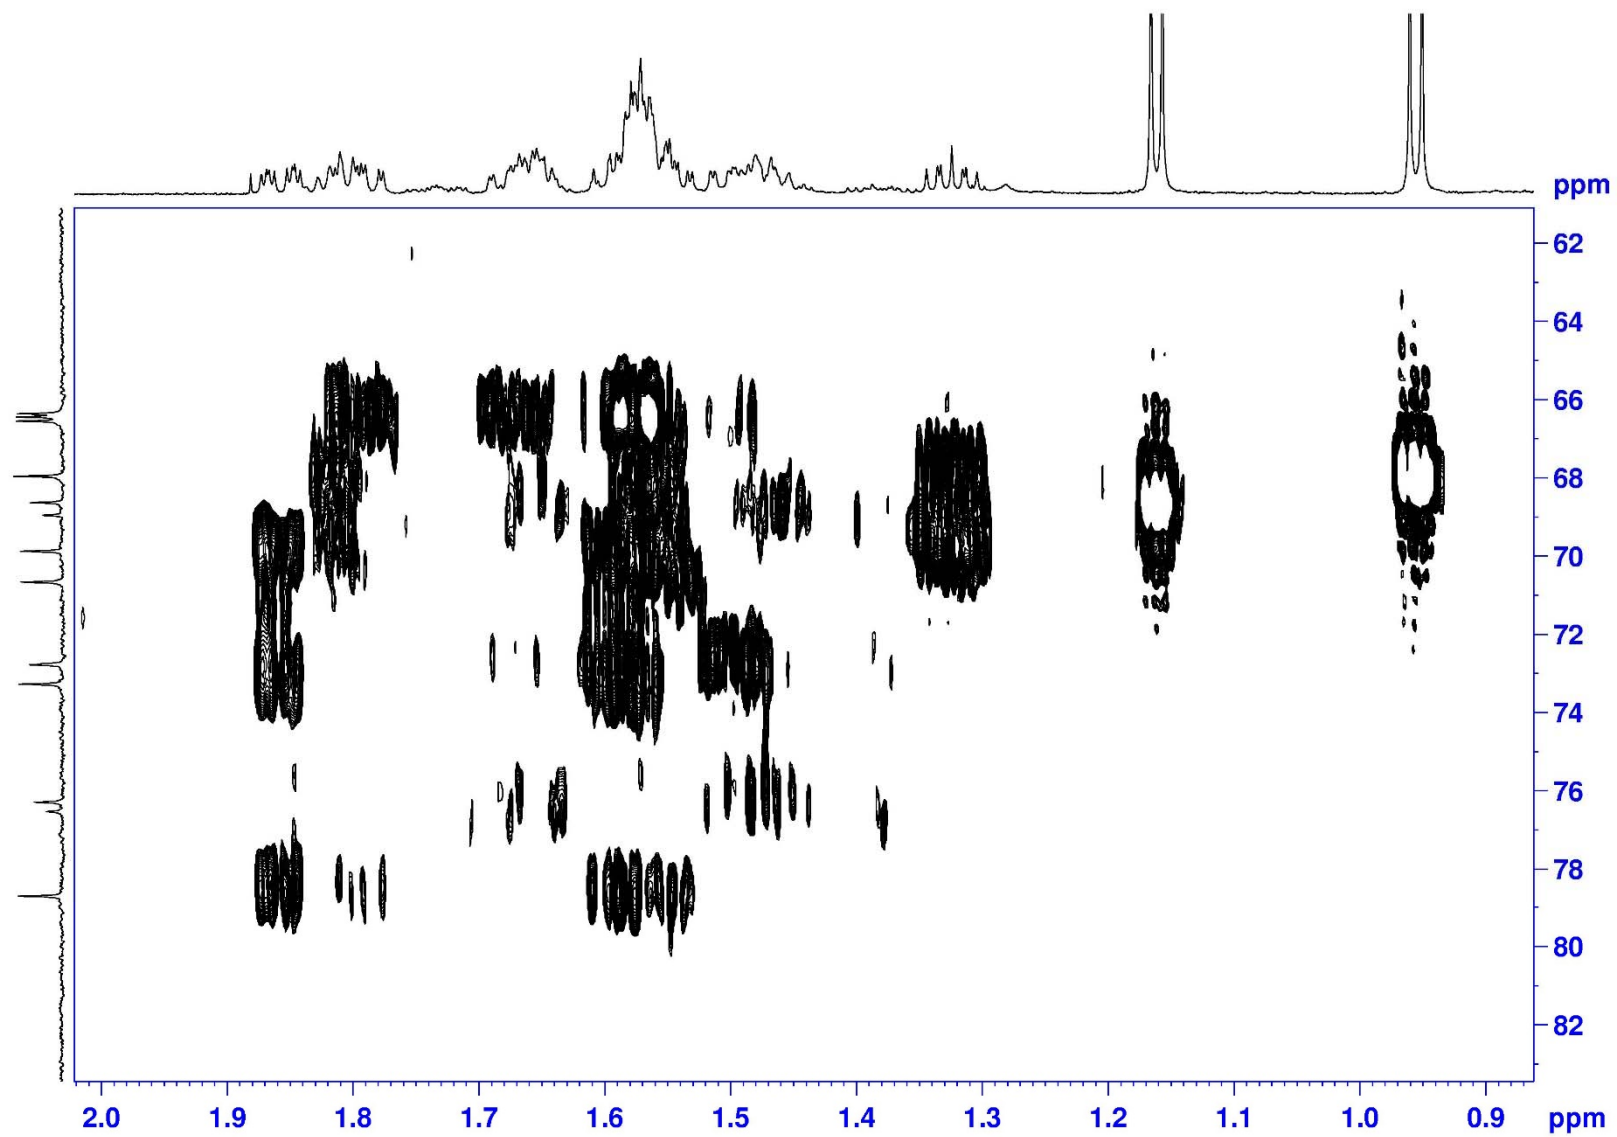



HMBC (700 MHz) spectrum of the fragment **1b** in CD<sub>3</sub>OD

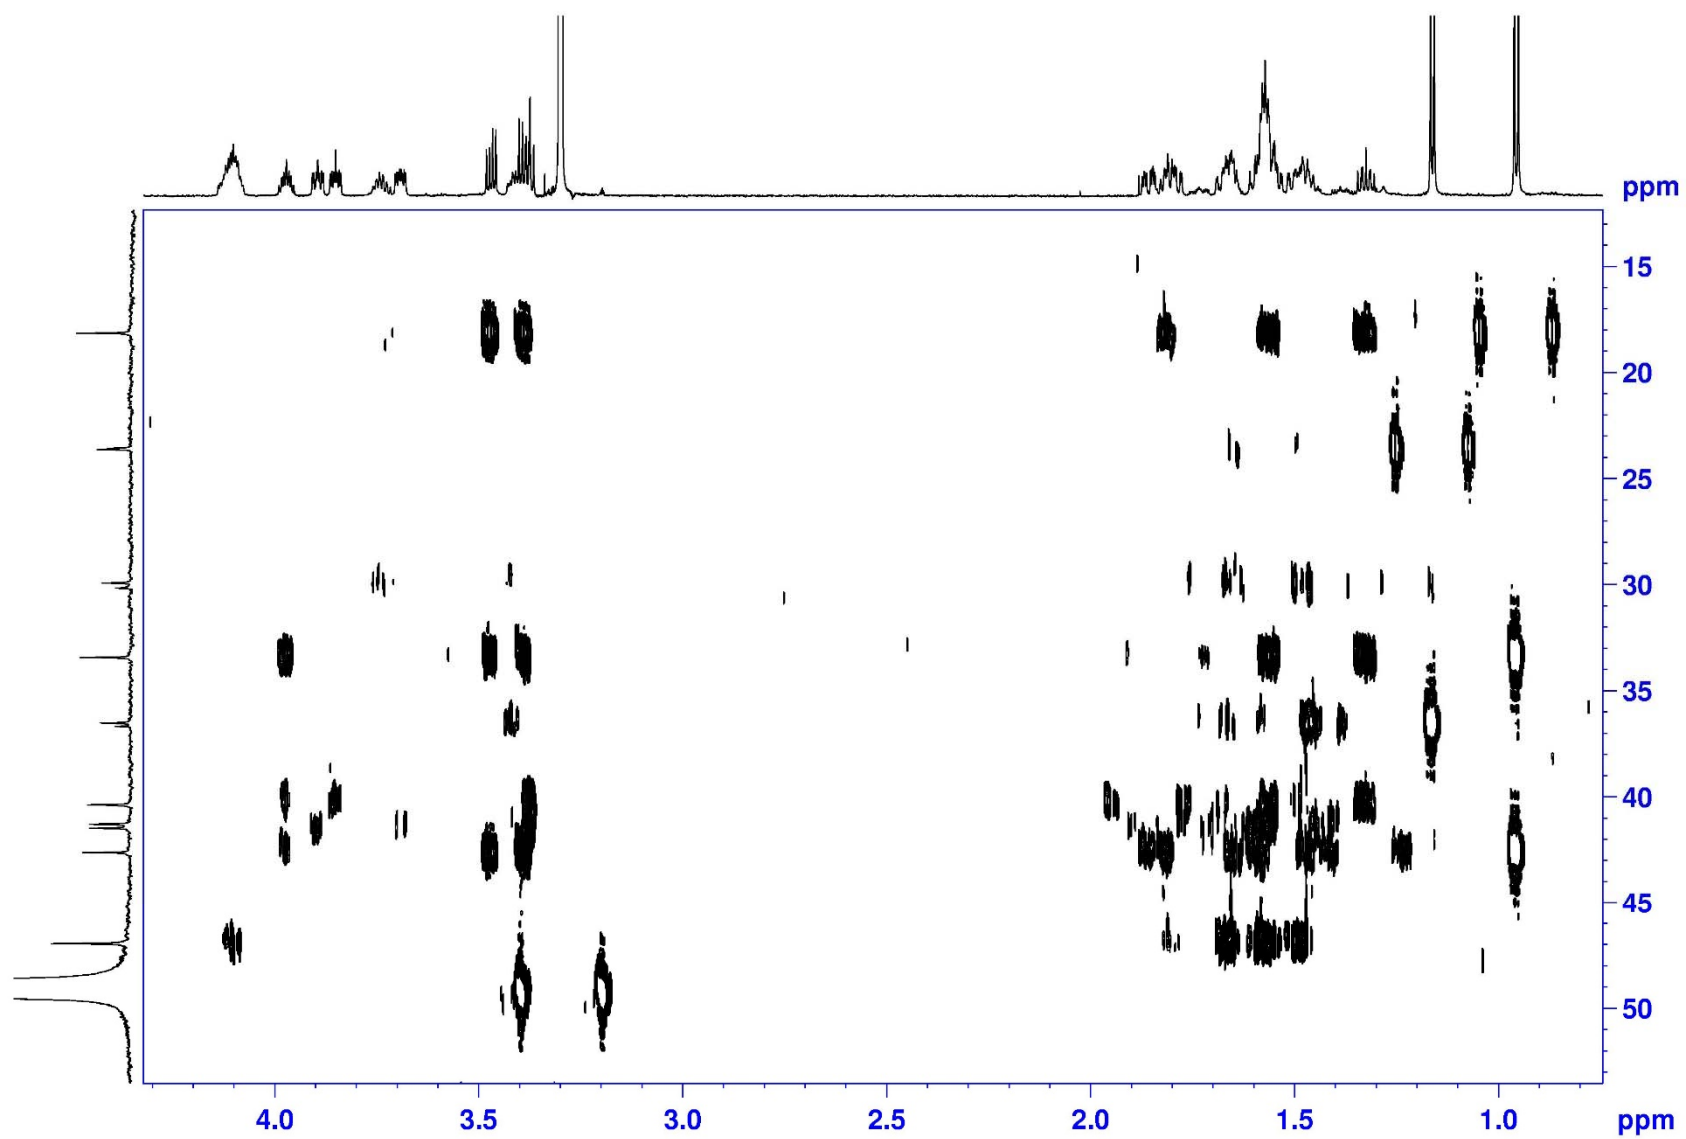

# 2D JRES (700 MHz) spectrum of the fragment **1b** in CD<sub>3</sub>OD

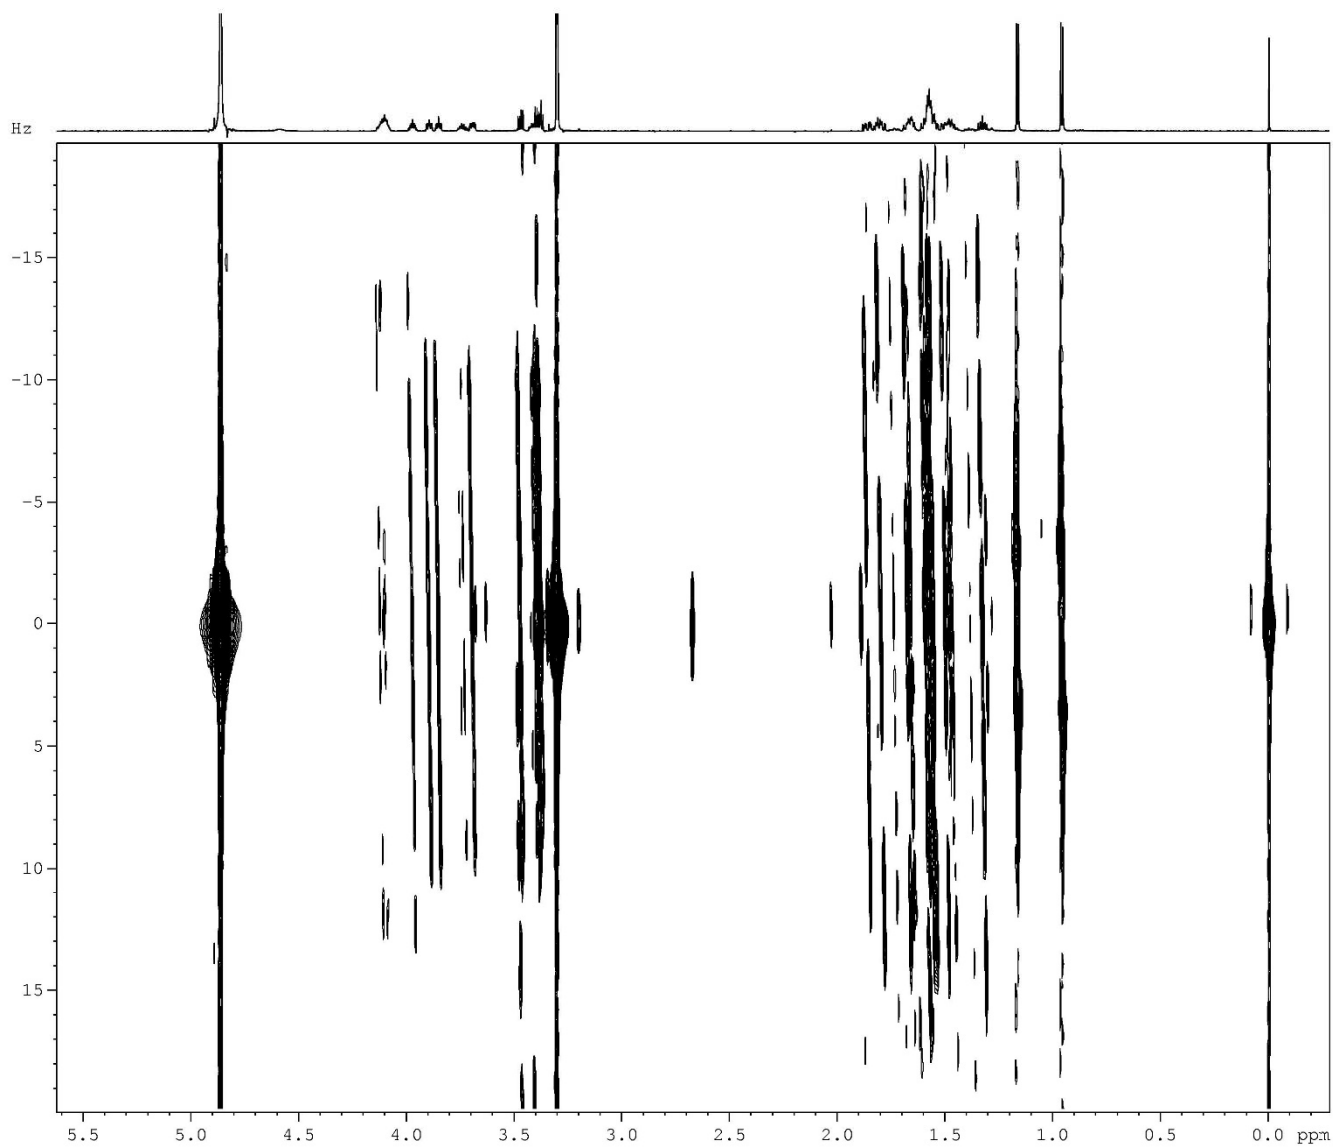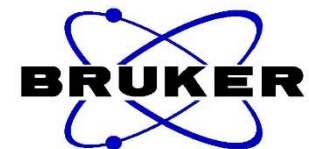

```
NAME      liwanshan-40-2-2-03-2
EXPNO     24
PROCNO    1
Date_     20200326
Time      22.32 h
INSTRUM   spect
PROBHD    Z120187_0028 (
PULPROG   jresgpprqf
TD         8192
SOLVENT   MeOD
NS         128
DS         16
SWH        4139.073 Hz
FIDRES     1.010516 Hz
AQ         0.9896436 sec
RG         124.11
DW         120.800 usec
DE         10.00 usec
TE         298.0 K
D0         0.00000300 sec
D1         1.00000000 sec
D11        0.03000000 sec
D12        0.00002000 sec
D16        0.00002000 sec
IN0        0.01250000 sec
ND0        2
TD         40
SFO1      700.1819 MHz
FIDRES     1.000000 Hz
SW         0.057 ppm
FnMODE     QF
SI         16384
SF         700.1800224 MHz
WDW        SINE
SSB        0
LB         0.00 Hz
GB         0
PC         1.00
SI         128
MC2        QF
SF         700.1818905 MHz
WDW        SINE
SSB        0
LB         0.00 Hz
GB         0
```

2D JRES (700 MHz) spectrum of the fragment **1b** in CD<sub>3</sub>OD

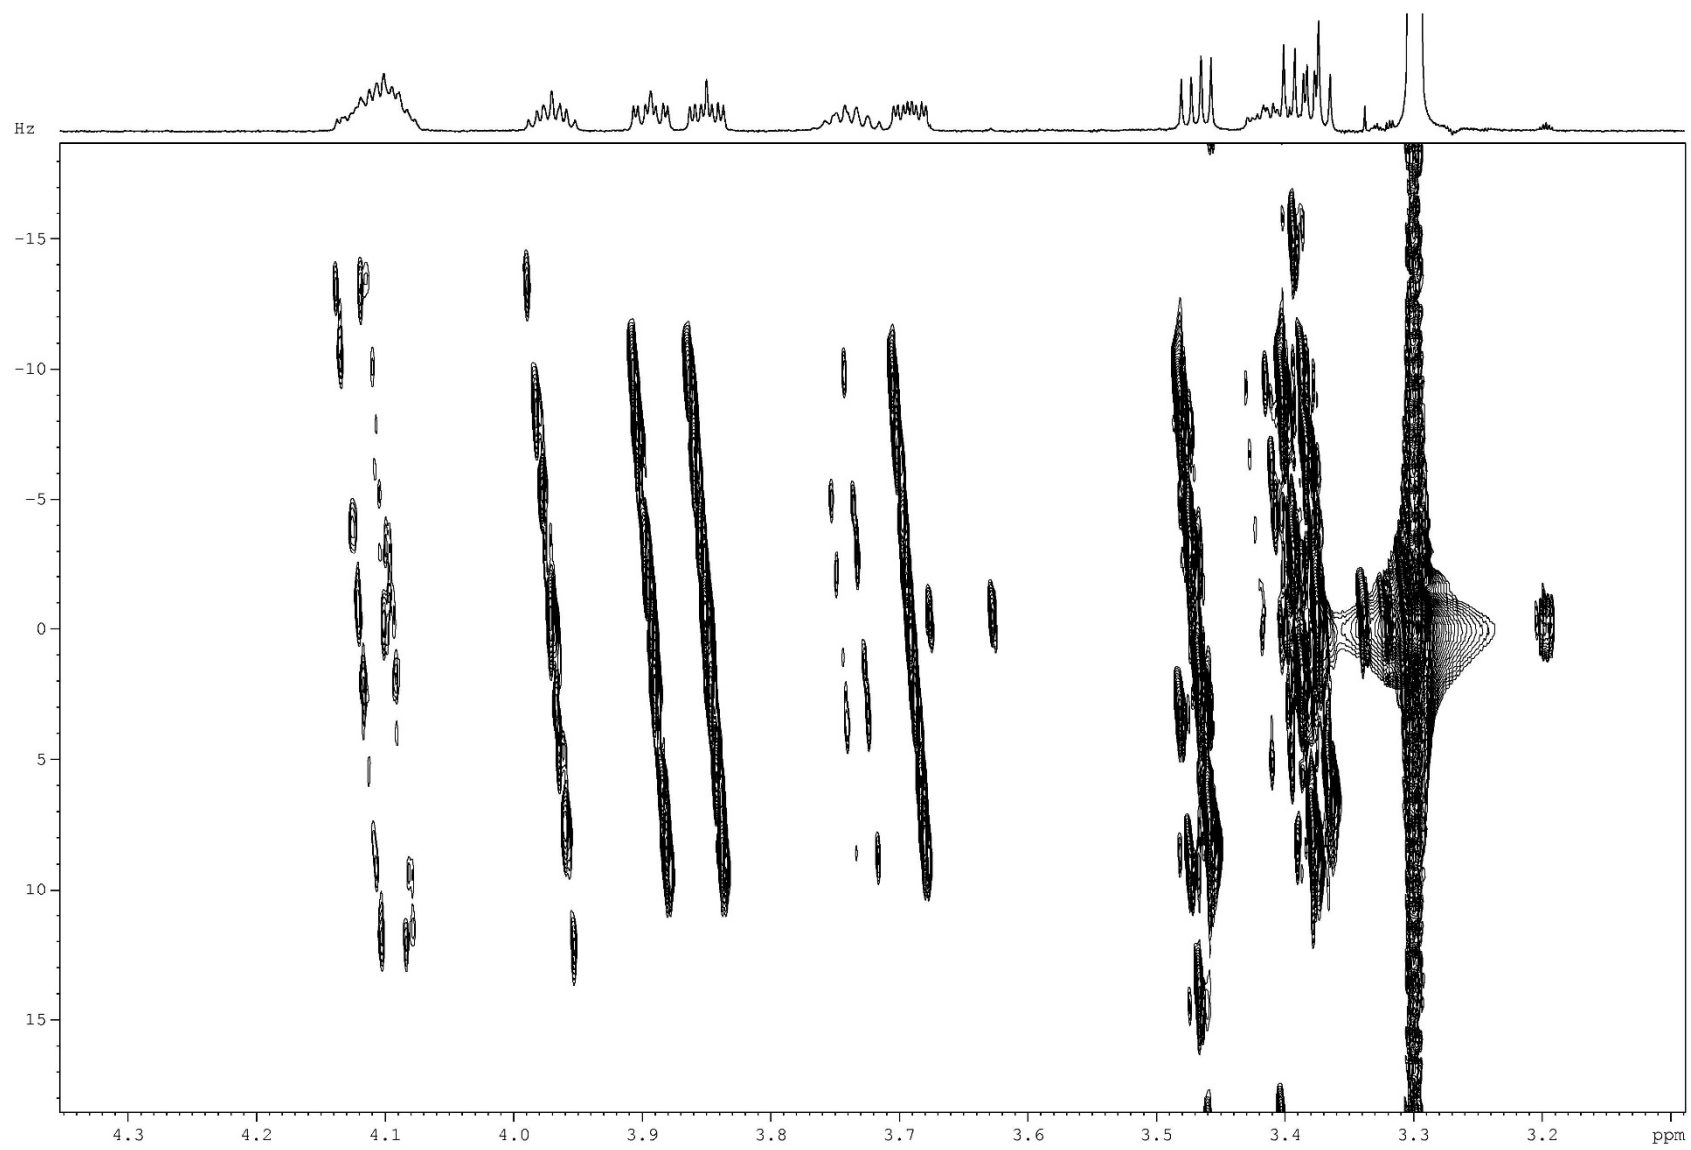

# 2D JRES (700 MHz) spectrum of the fragment **1b** in CD<sub>3</sub>OD

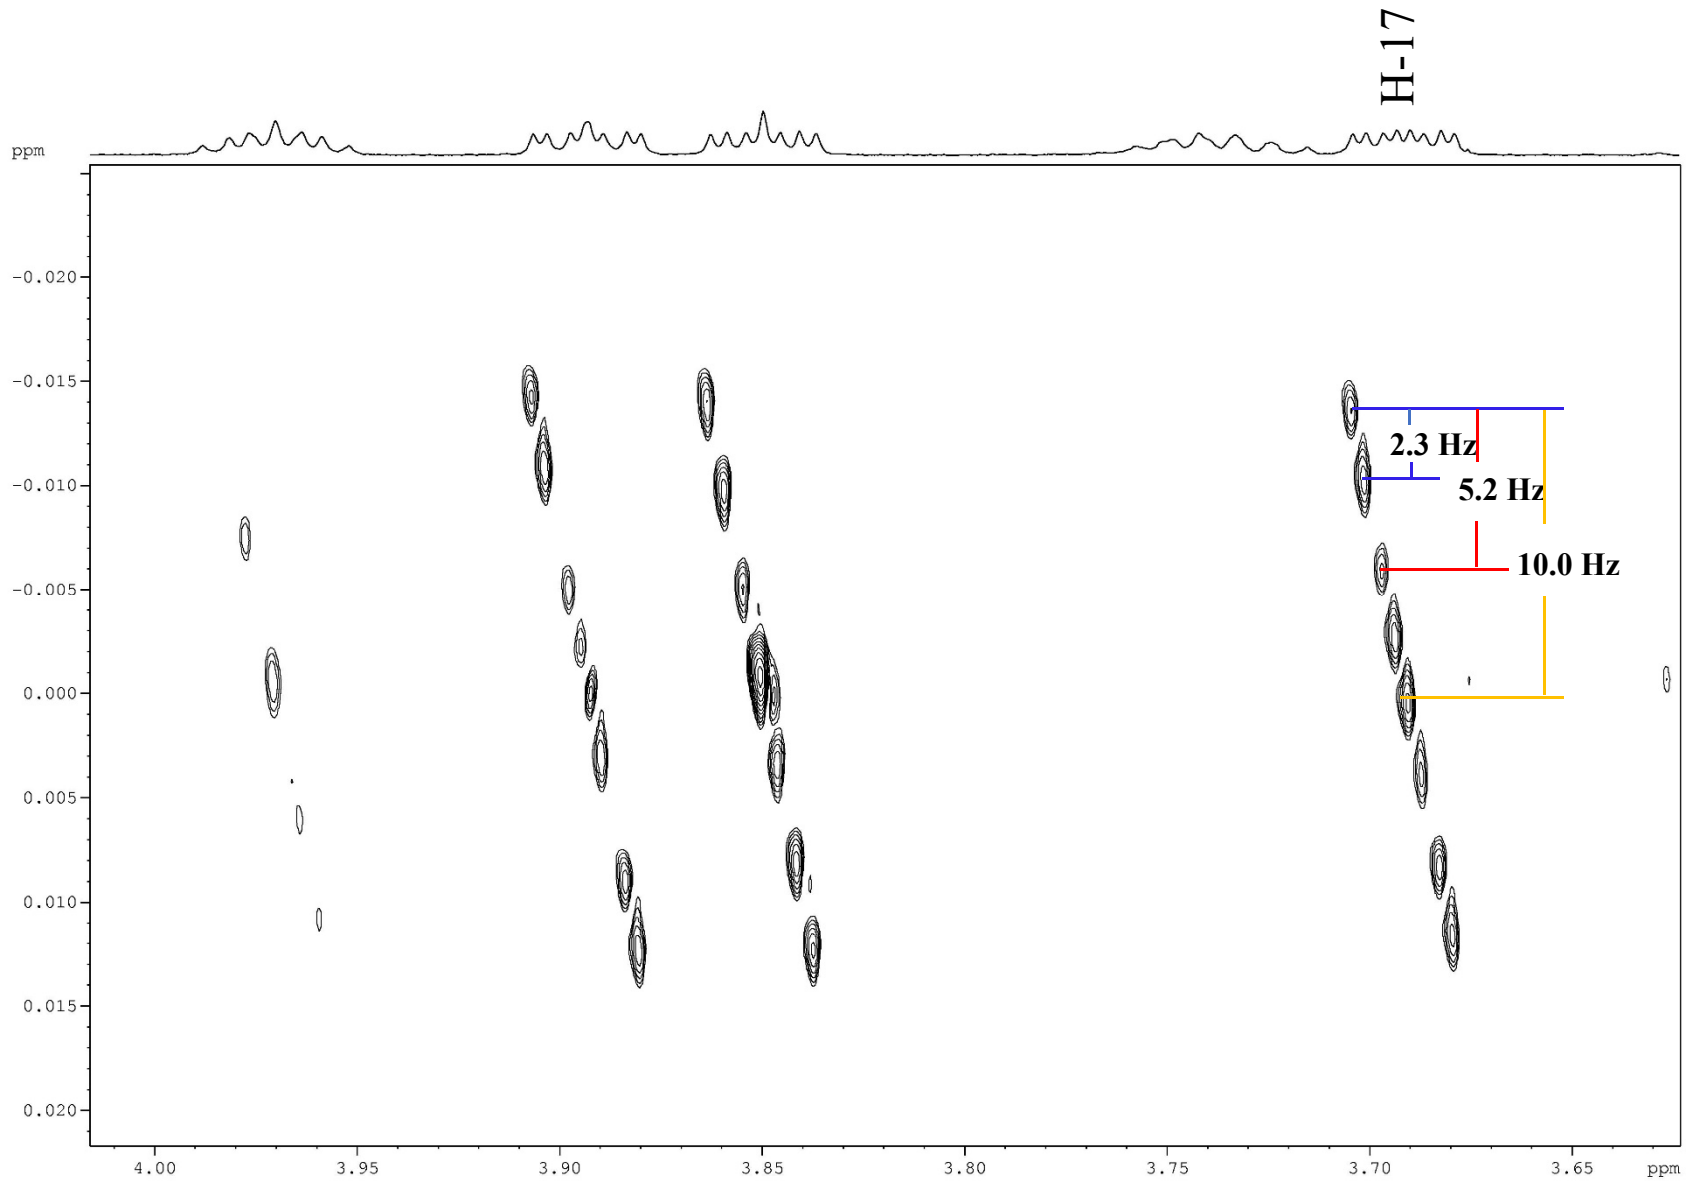

2D JRES (700 MHz) spectrum of the fragment **1b** in CD<sub>3</sub>OD

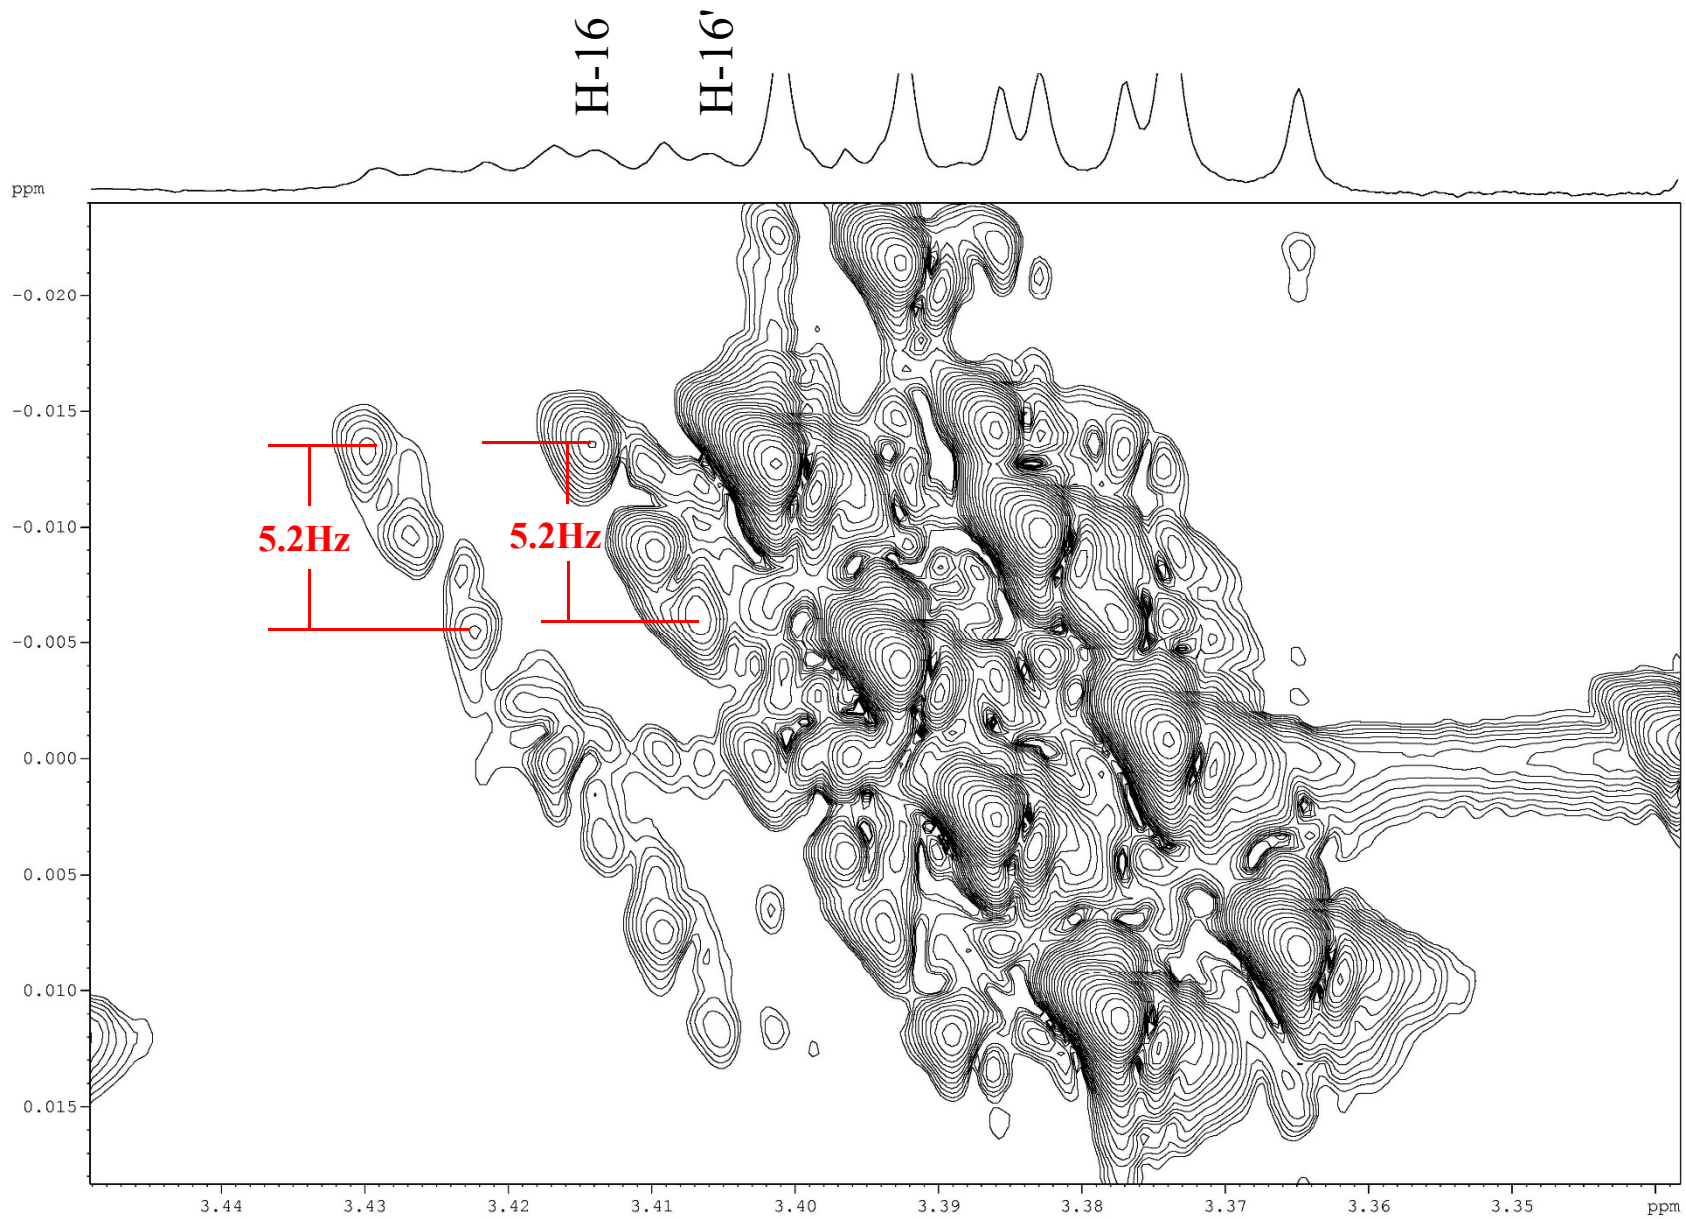

2D JRES (700 MHz) spectrum of the fragment **1b** in CD<sub>3</sub>OD

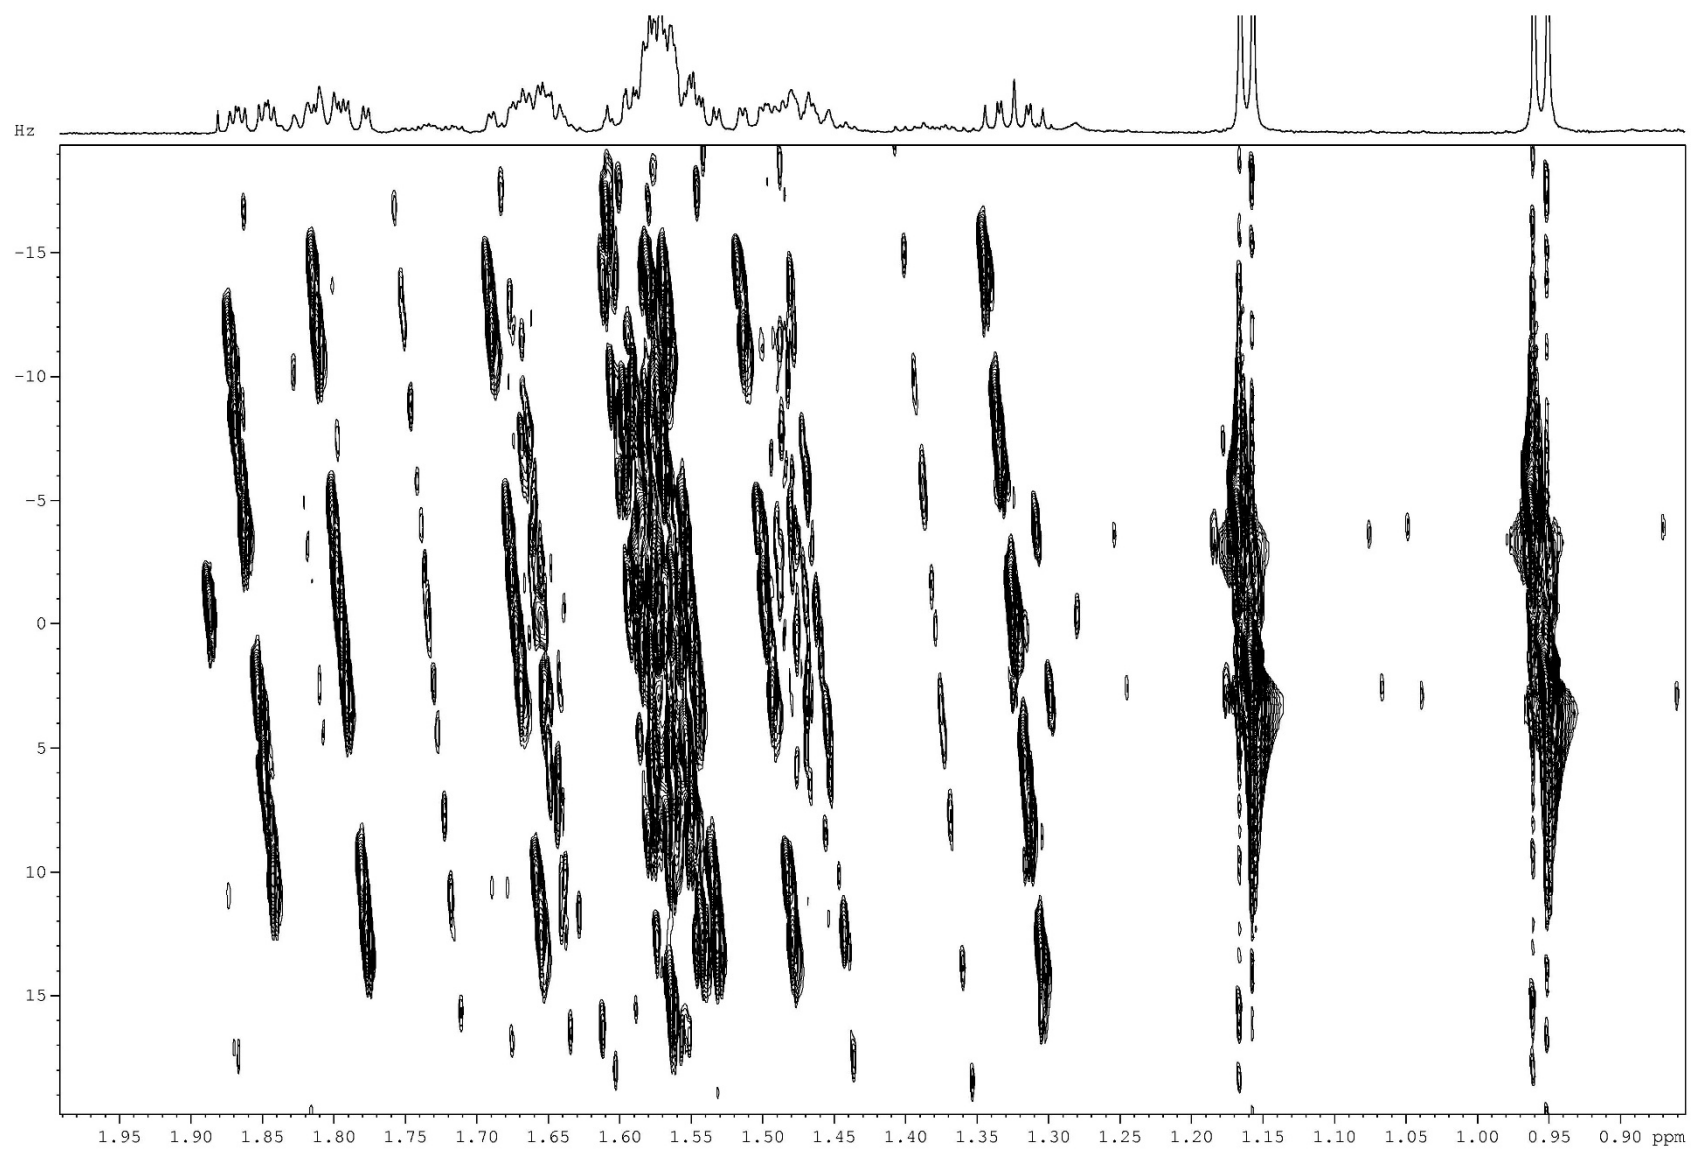

2D JRES (700 MHz) spectrum of the fragment **1b** in CD<sub>3</sub>OD

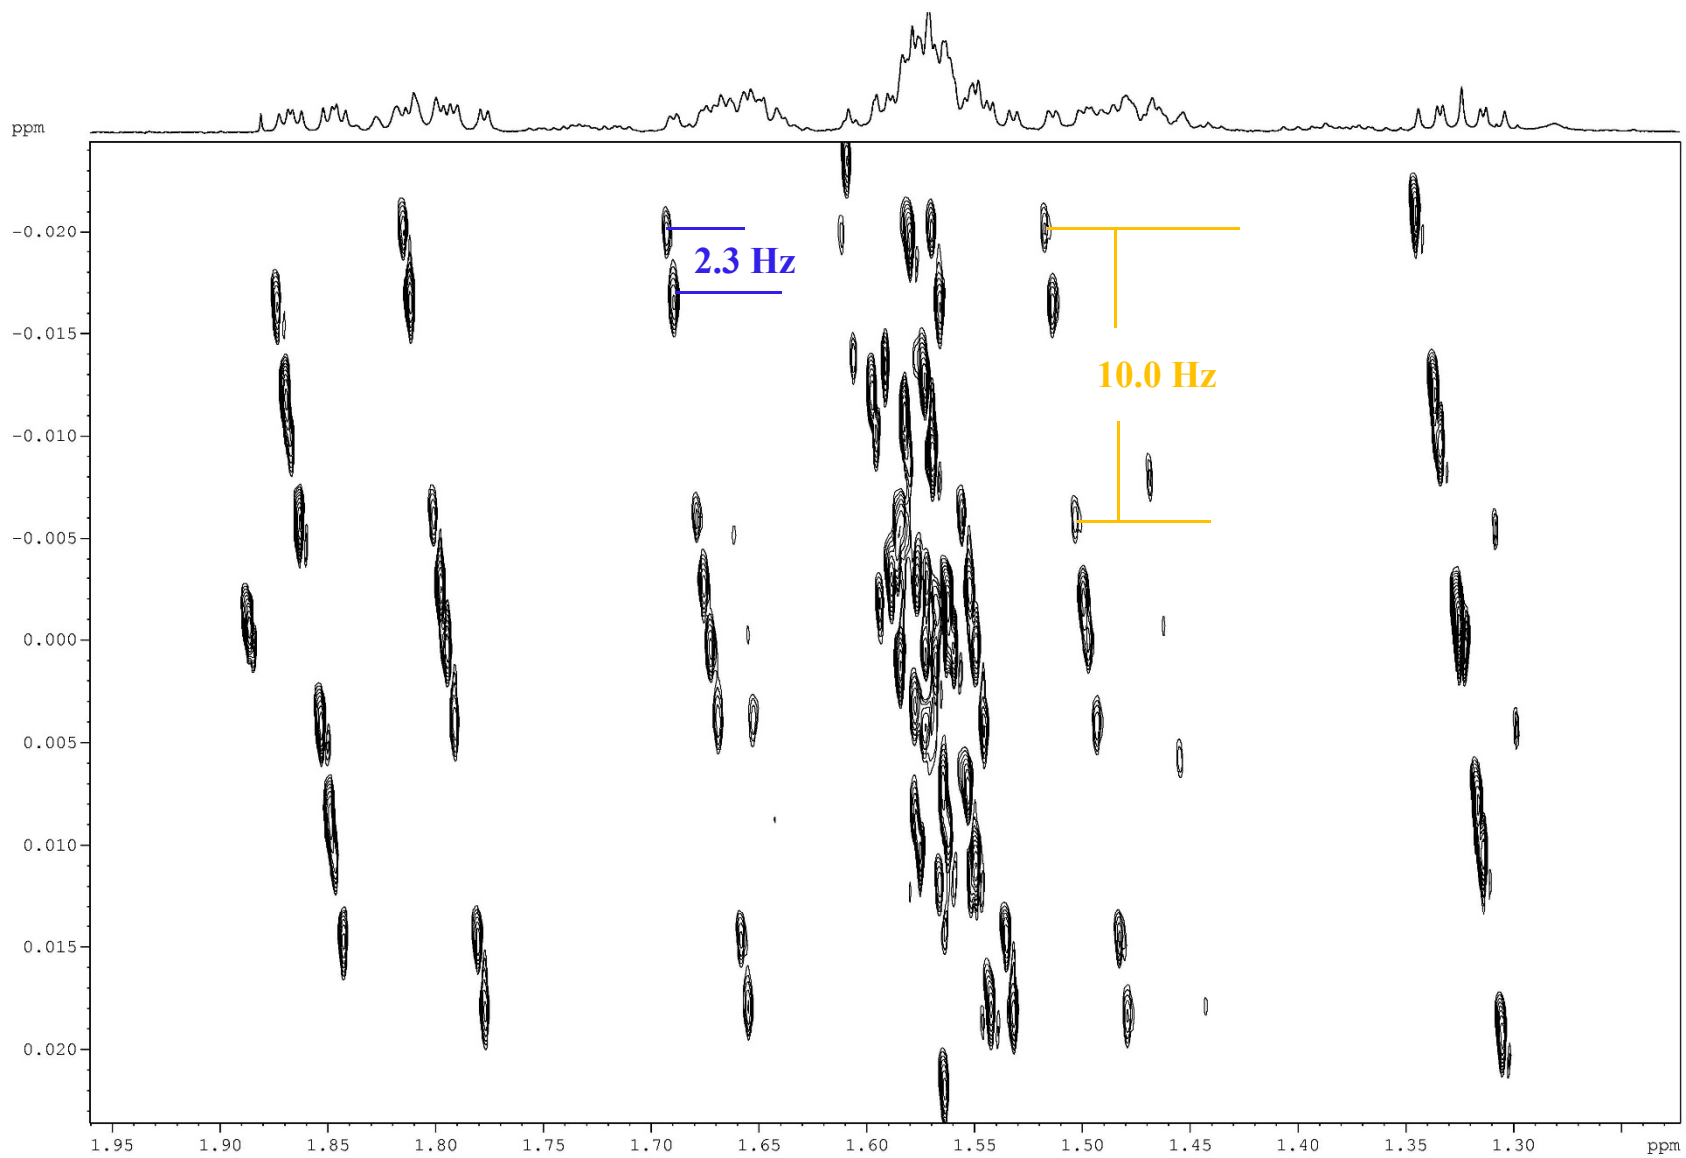

# HECADE (700 MHz) spectrum of the fragment **1b** in CD<sub>3</sub>OD

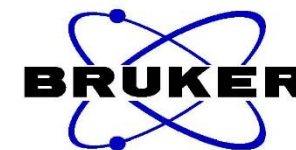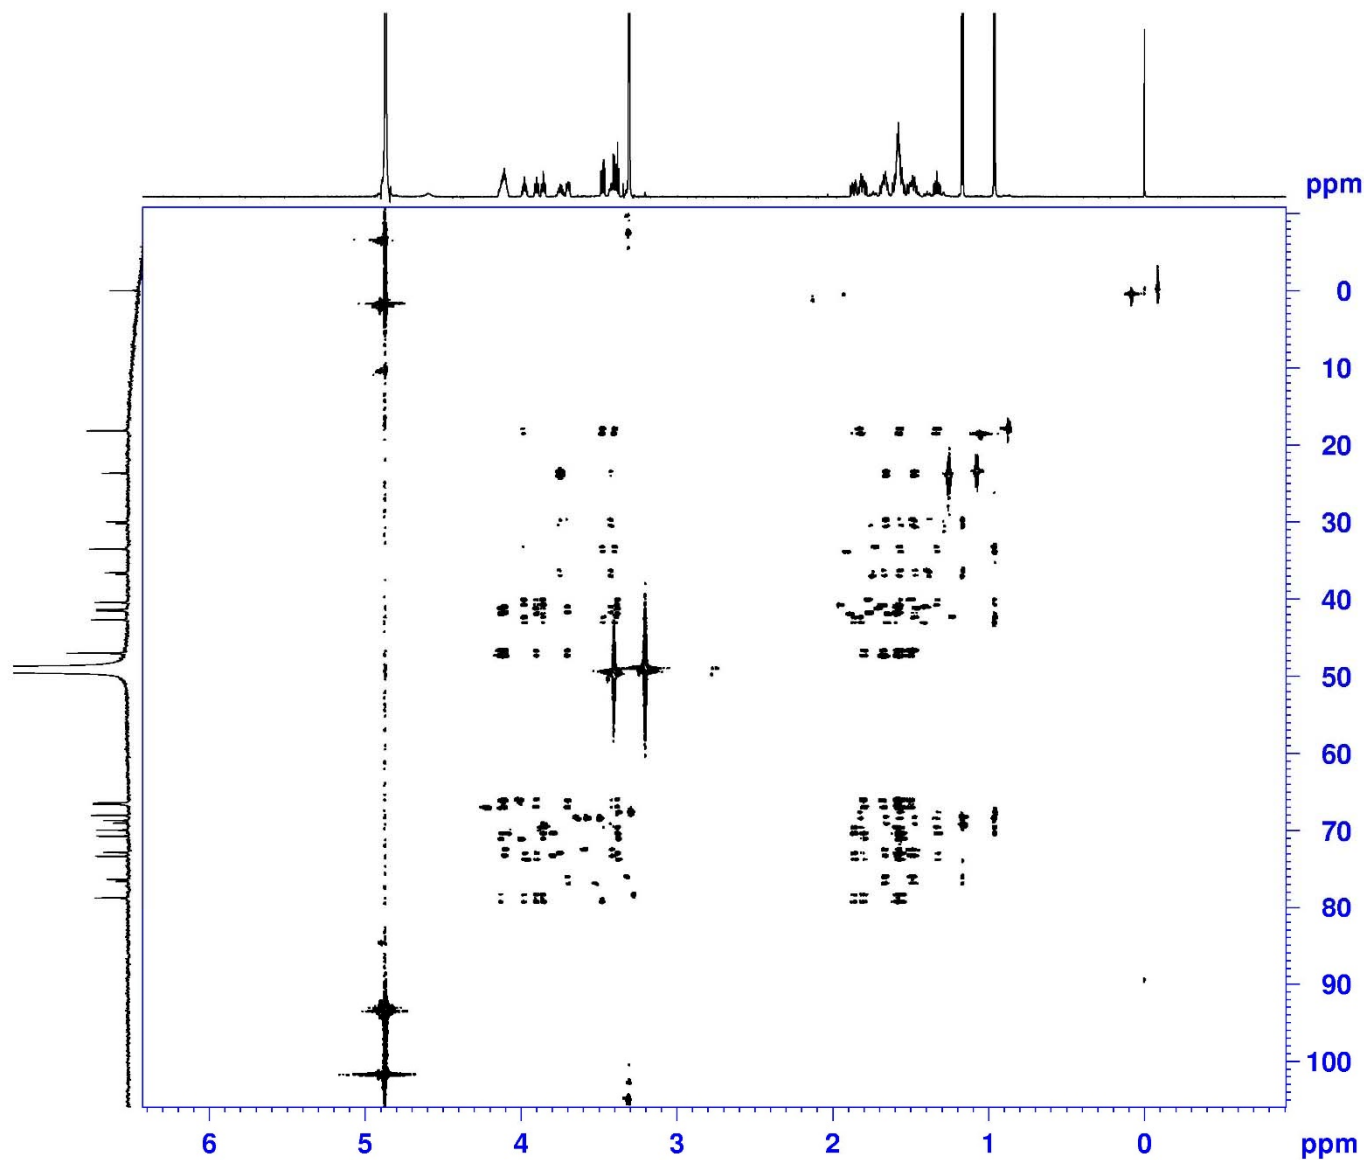

```

NAME      liwanshan-40-2-2-03-
EXPNO     29
PROCNO    1
Date_     20200819
Time      14.17 h
INSTRUM   spect
PROBHD    Z120187_0028 (
PULPROG   hsqcdietgpcndsisp
TD         4096
SOLVENT   MeOD
NS         56
DS         16
SWH        5136.986 Hz
FIDRES     2.508294 Hz
AQ         0.3987273 sec
RG         181.26
DW         97.333 usec
DE         10.00 usec
TE         298.0 K
CNST2     145.0000000
CNST16    1.0000000
CNST17    -0.5000000
D0         0.00000300 sec
D1         1.00000000 sec
D2         0.00344828 sec
D4         0.00172414 sec
D9         0.08000000 sec
D16        0.00020000 sec
D20        0.00000300 sec
D24        0.00089000 sec
IN0        0.00002430 sec
IN20       0.00002430 sec
L0         1
L1         28
ND0        2
TD         512
SFO1       176.0685 MHz
FIDRES     40.187756 Hz
SW         116.864 ppm
FnMODE     Echo-Antiecho
SI         8192
SF         700.1800183 MHz
WDW        QSINE
SSB        2
LB         0.00 Hz
GB         0
PC         1.40
SI         1024
MC2        echo-antiecho
SF         176.0601399 MHz
WDW        QSINE
SSB        2
  
```



HECADE (700 MHz) spectrum of the fragment **1b** in CD<sub>3</sub>OD

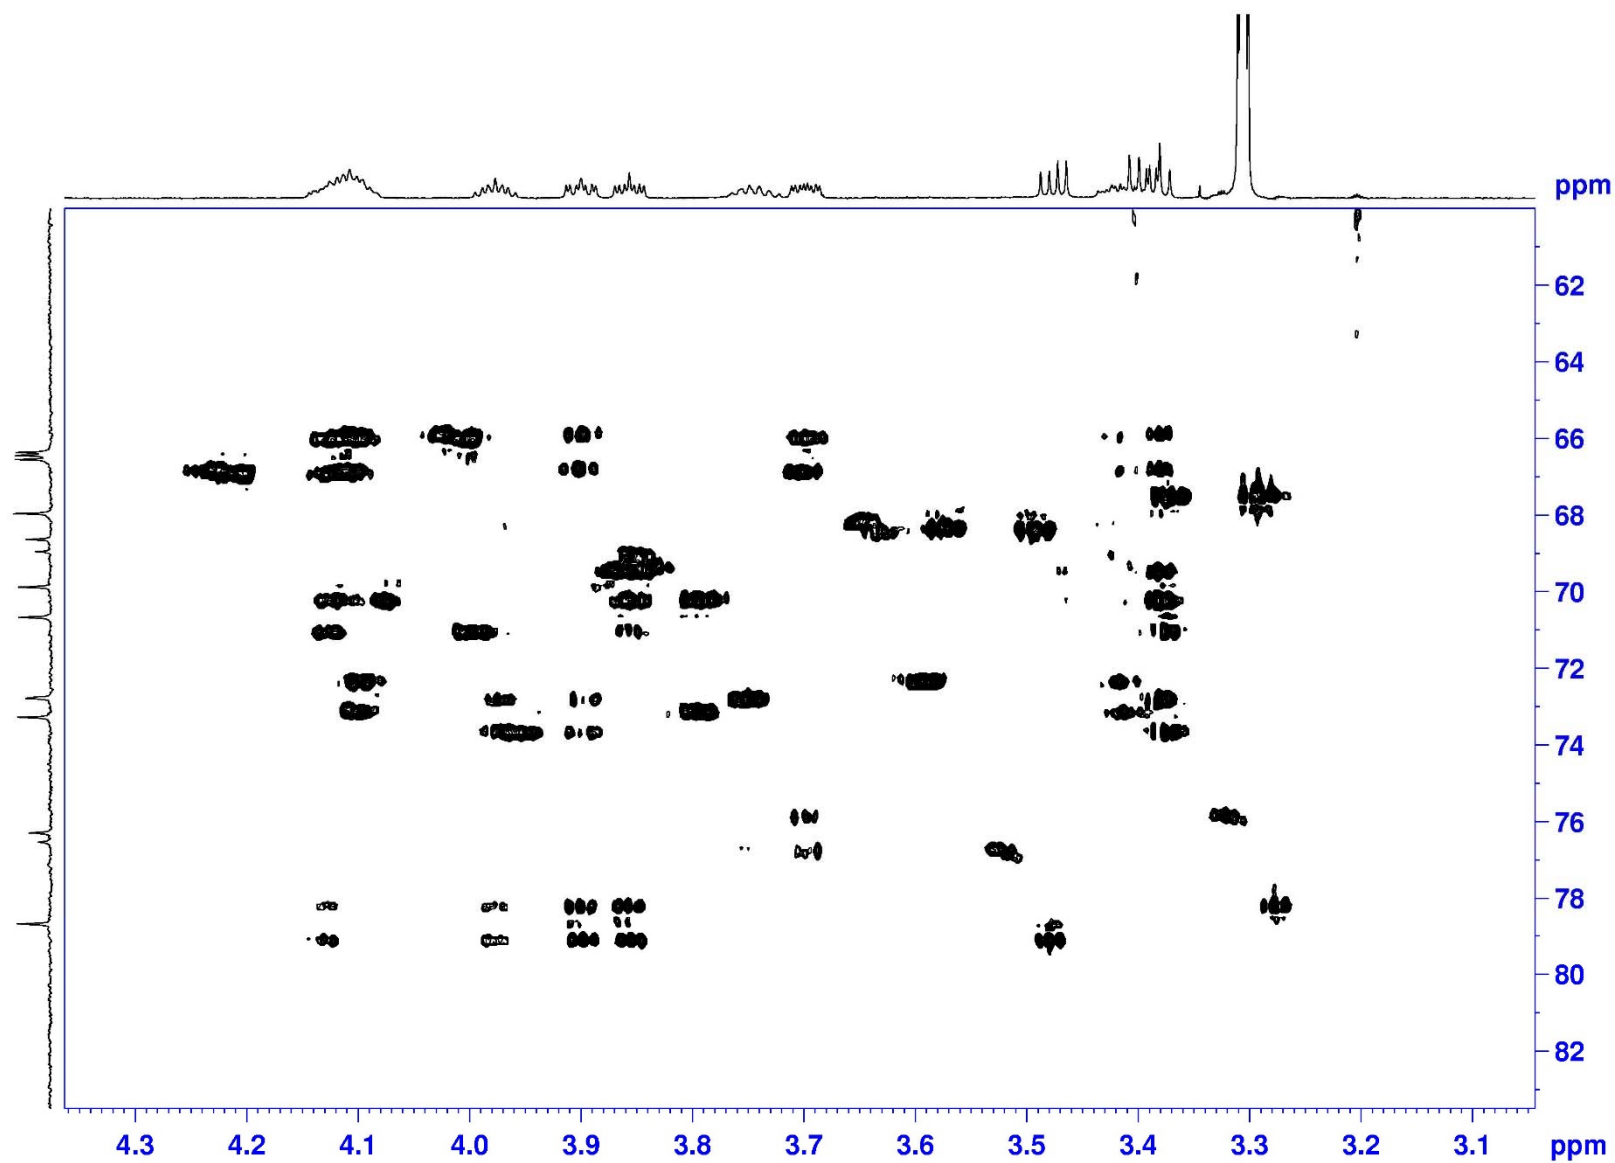

HECADE (700 MHz) spectrum of the fragment **1b** in CD<sub>3</sub>OD

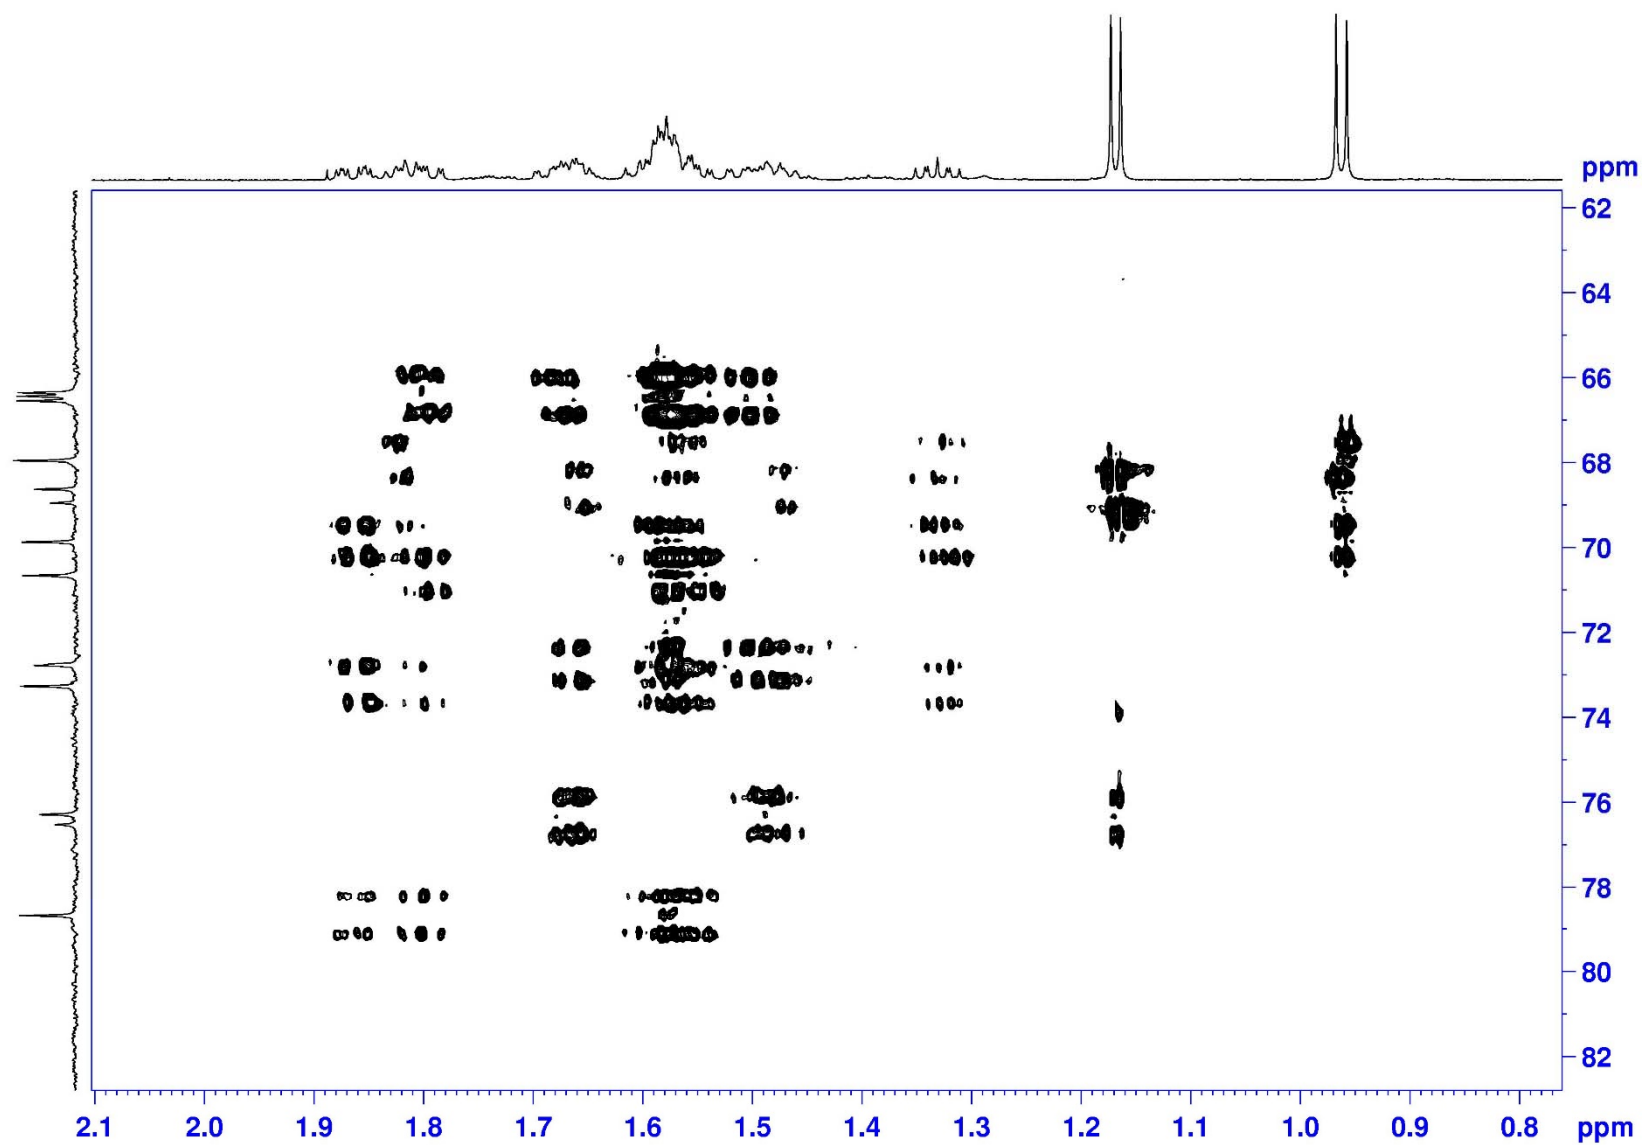

HECADE (700 MHz) spectrum of the fragment **1b** in CD<sub>3</sub>OD

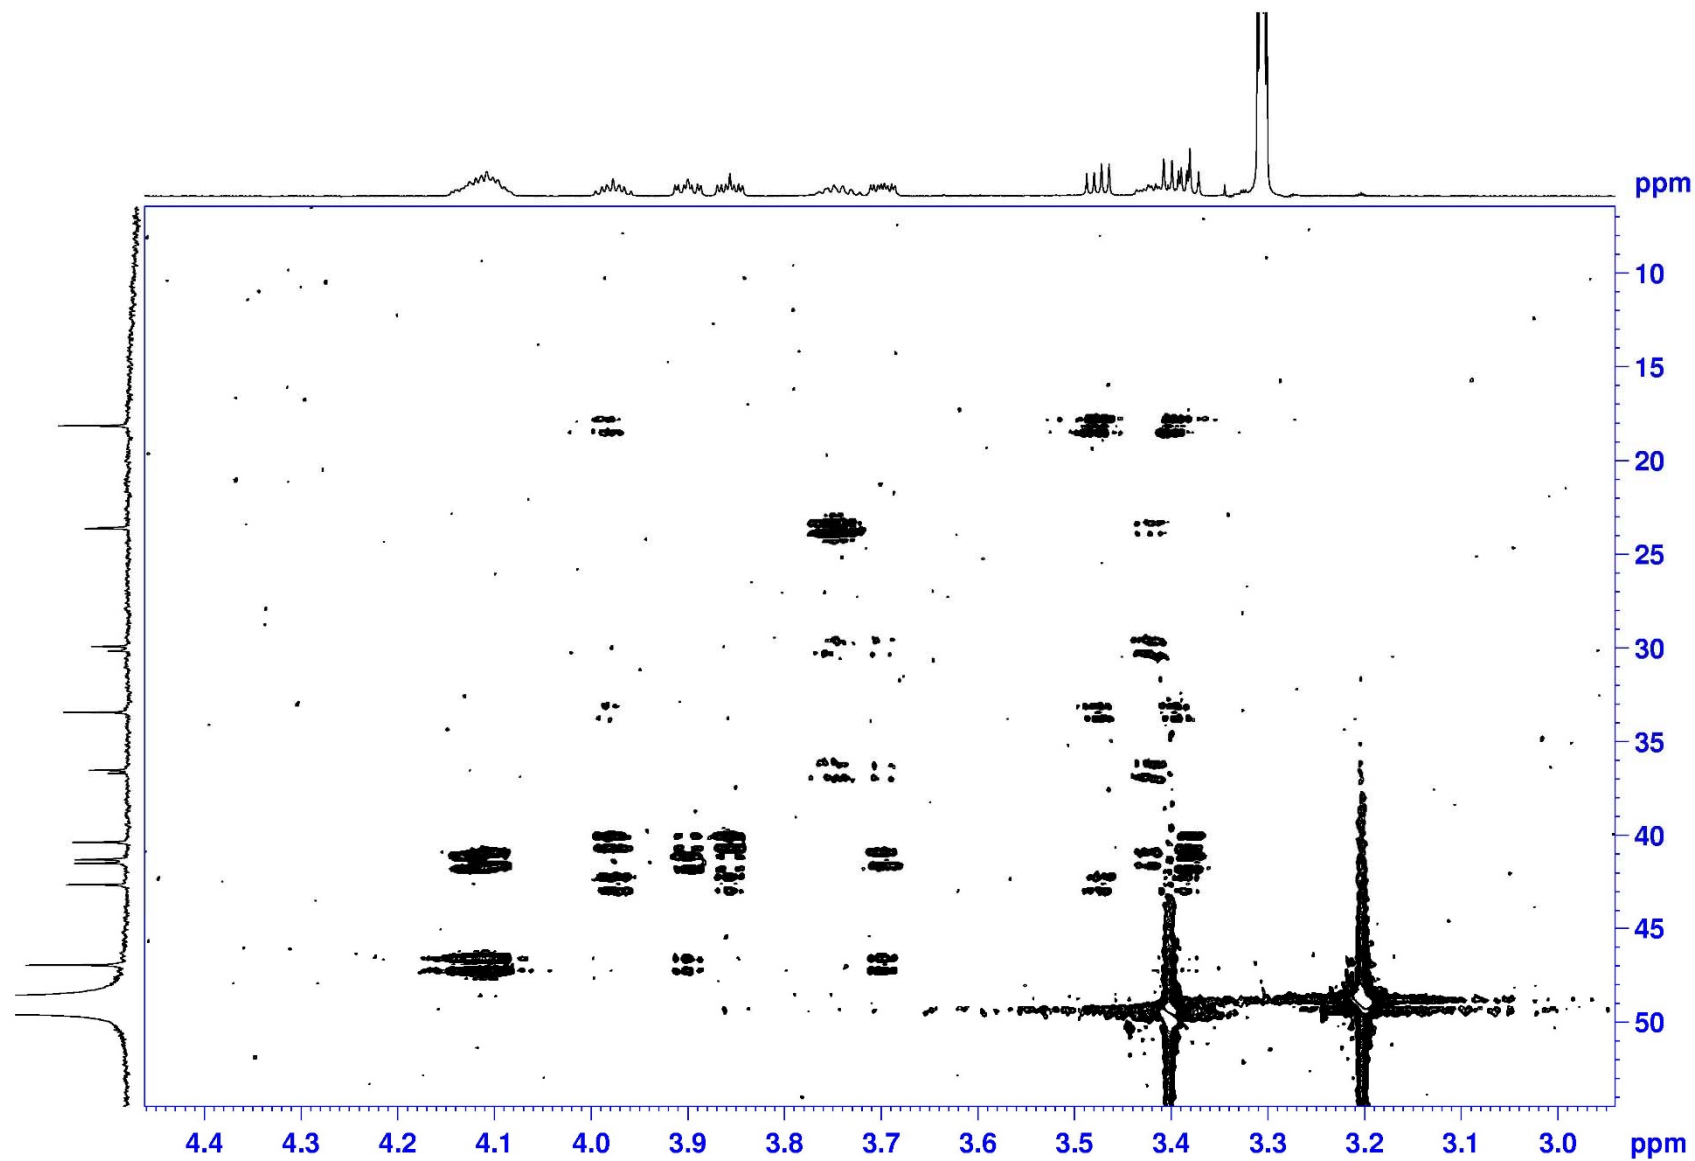

HECADE (700 MHz) spectrum of the fragment **1b** in CD<sub>3</sub>OD

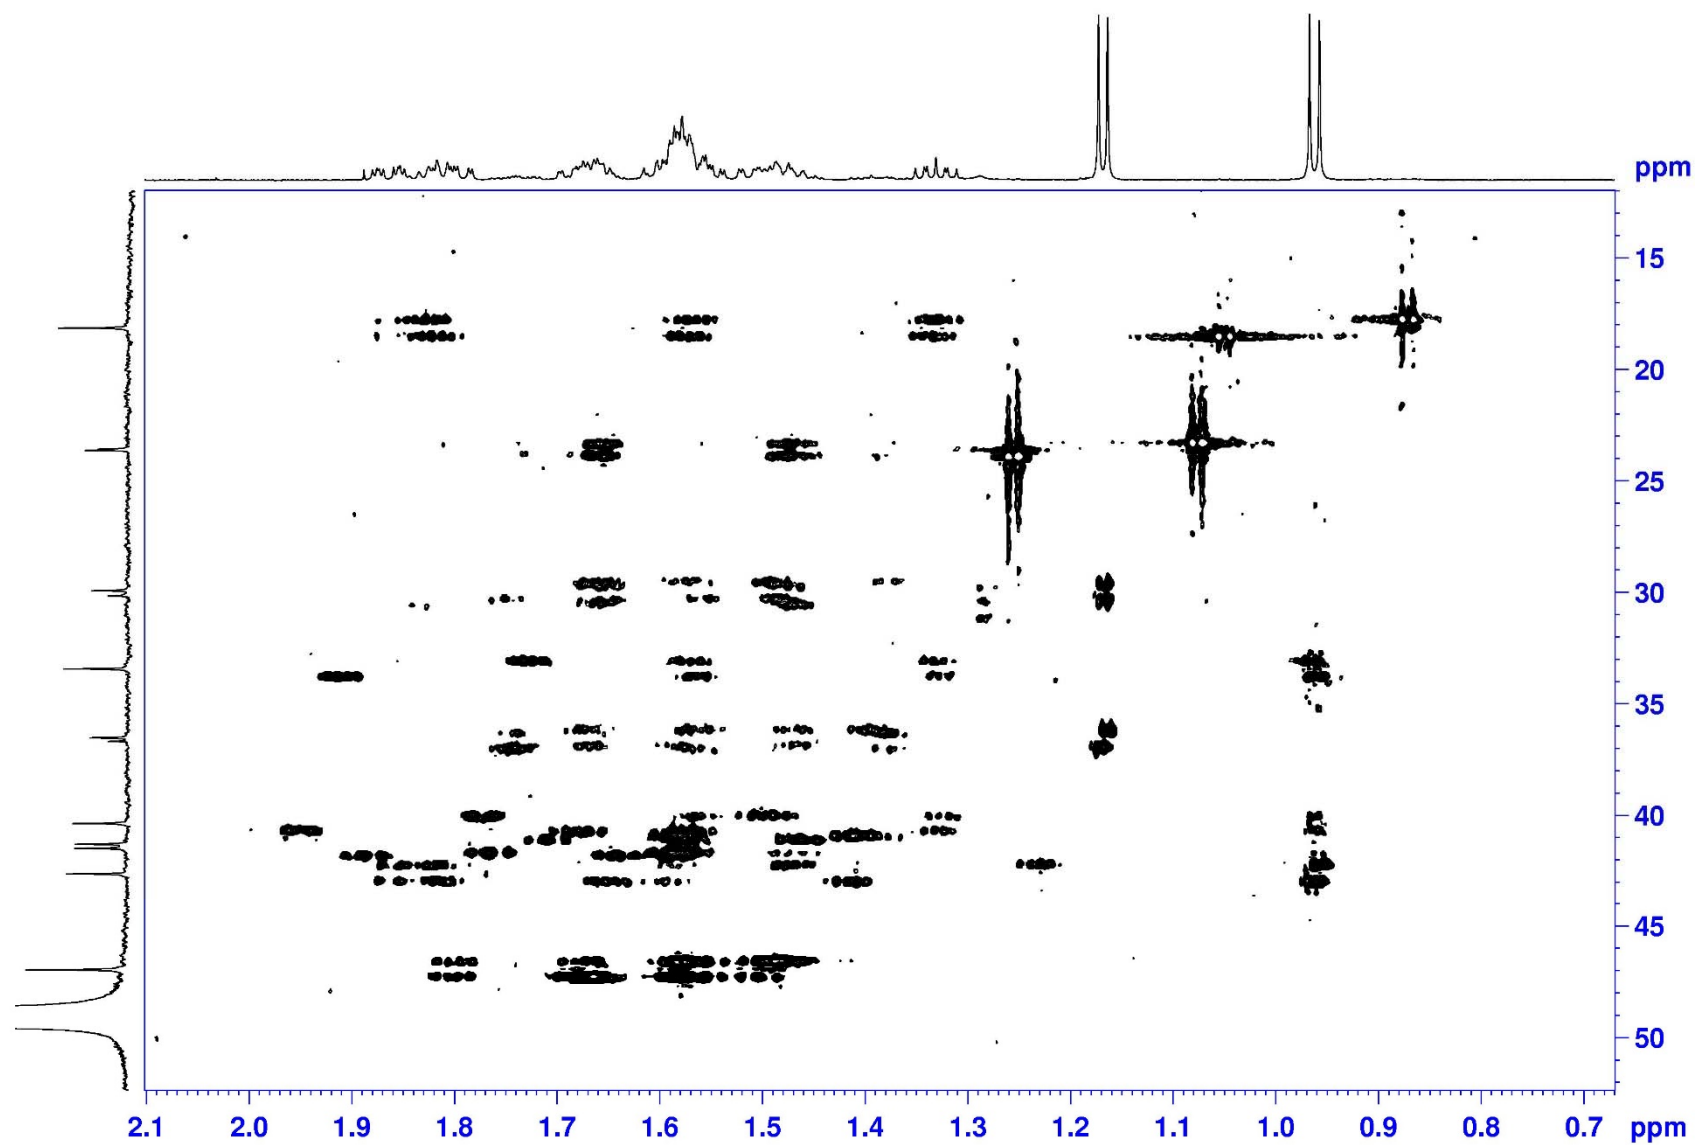

HECADE (700 MHz) spectrum of the fragment **1b** in CD<sub>3</sub>OD

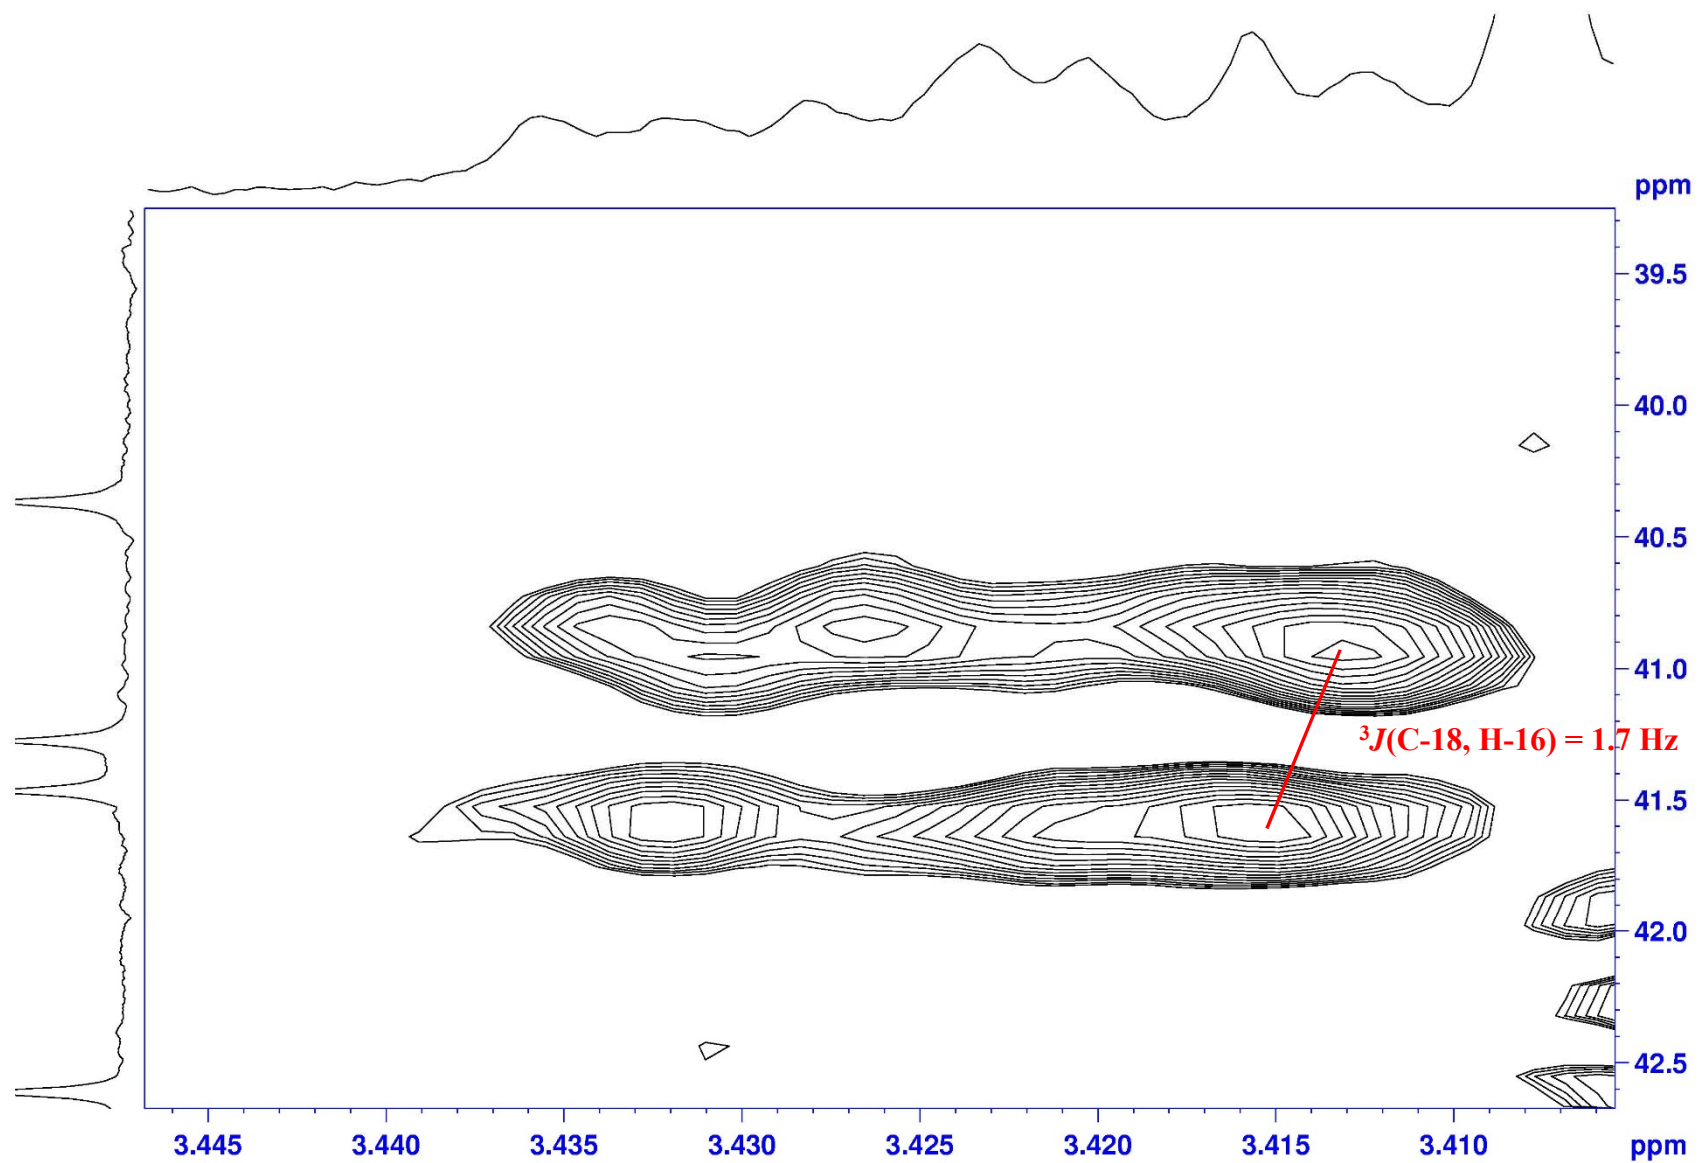

# HECADE (700 MHz) spectrum of the fragment **1b** in CD<sub>3</sub>OD

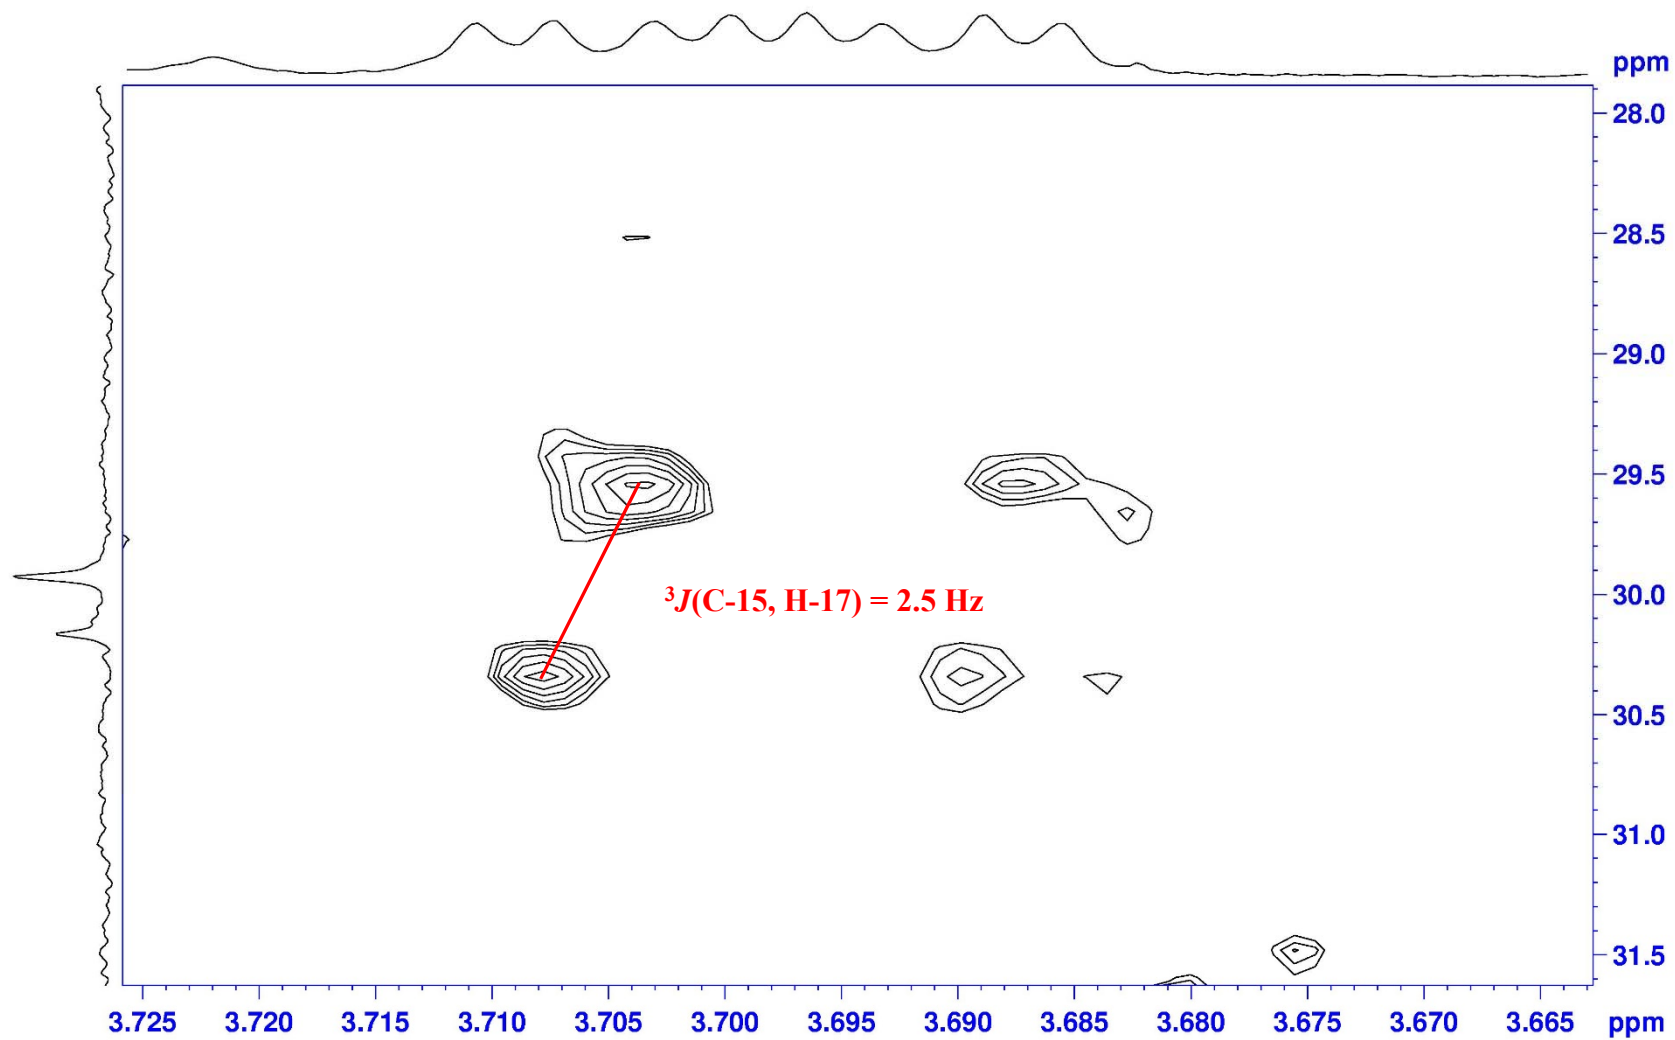

HECADE (700 MHz) spectrum of the fragment **1b** in CD<sub>3</sub>OD

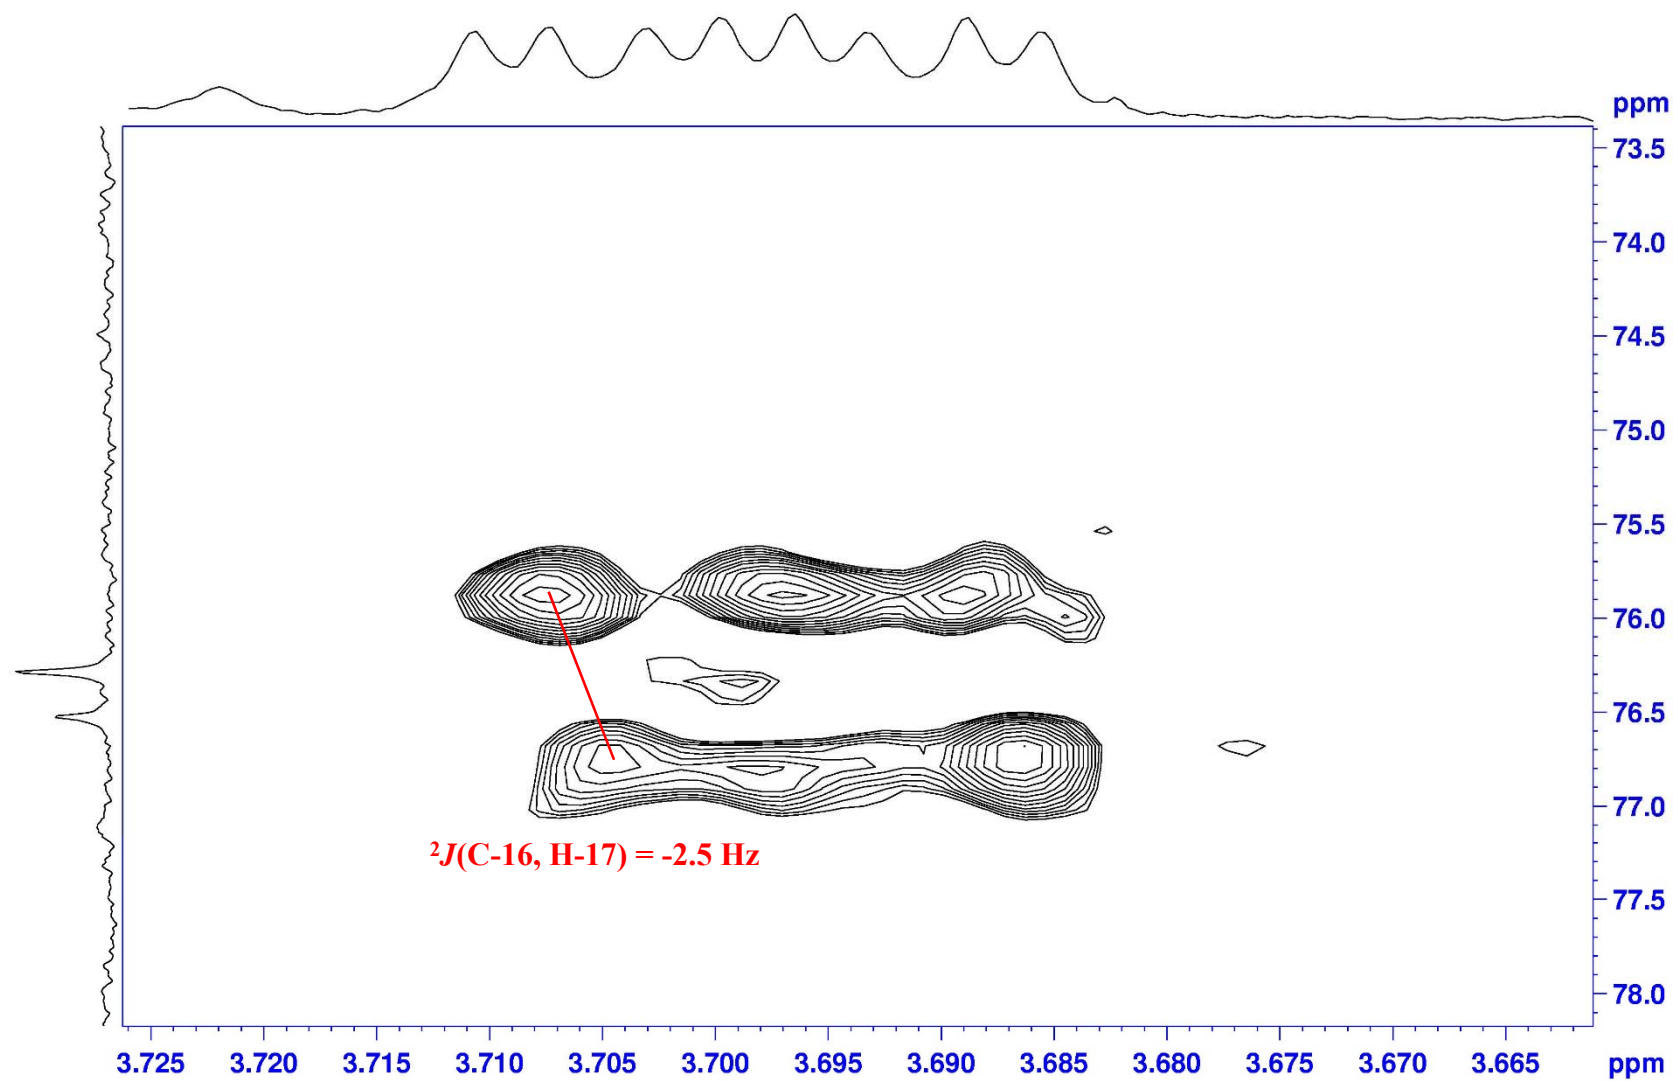

HECADE (700 MHz) spectrum of the fragment **1b** in CD<sub>3</sub>OD

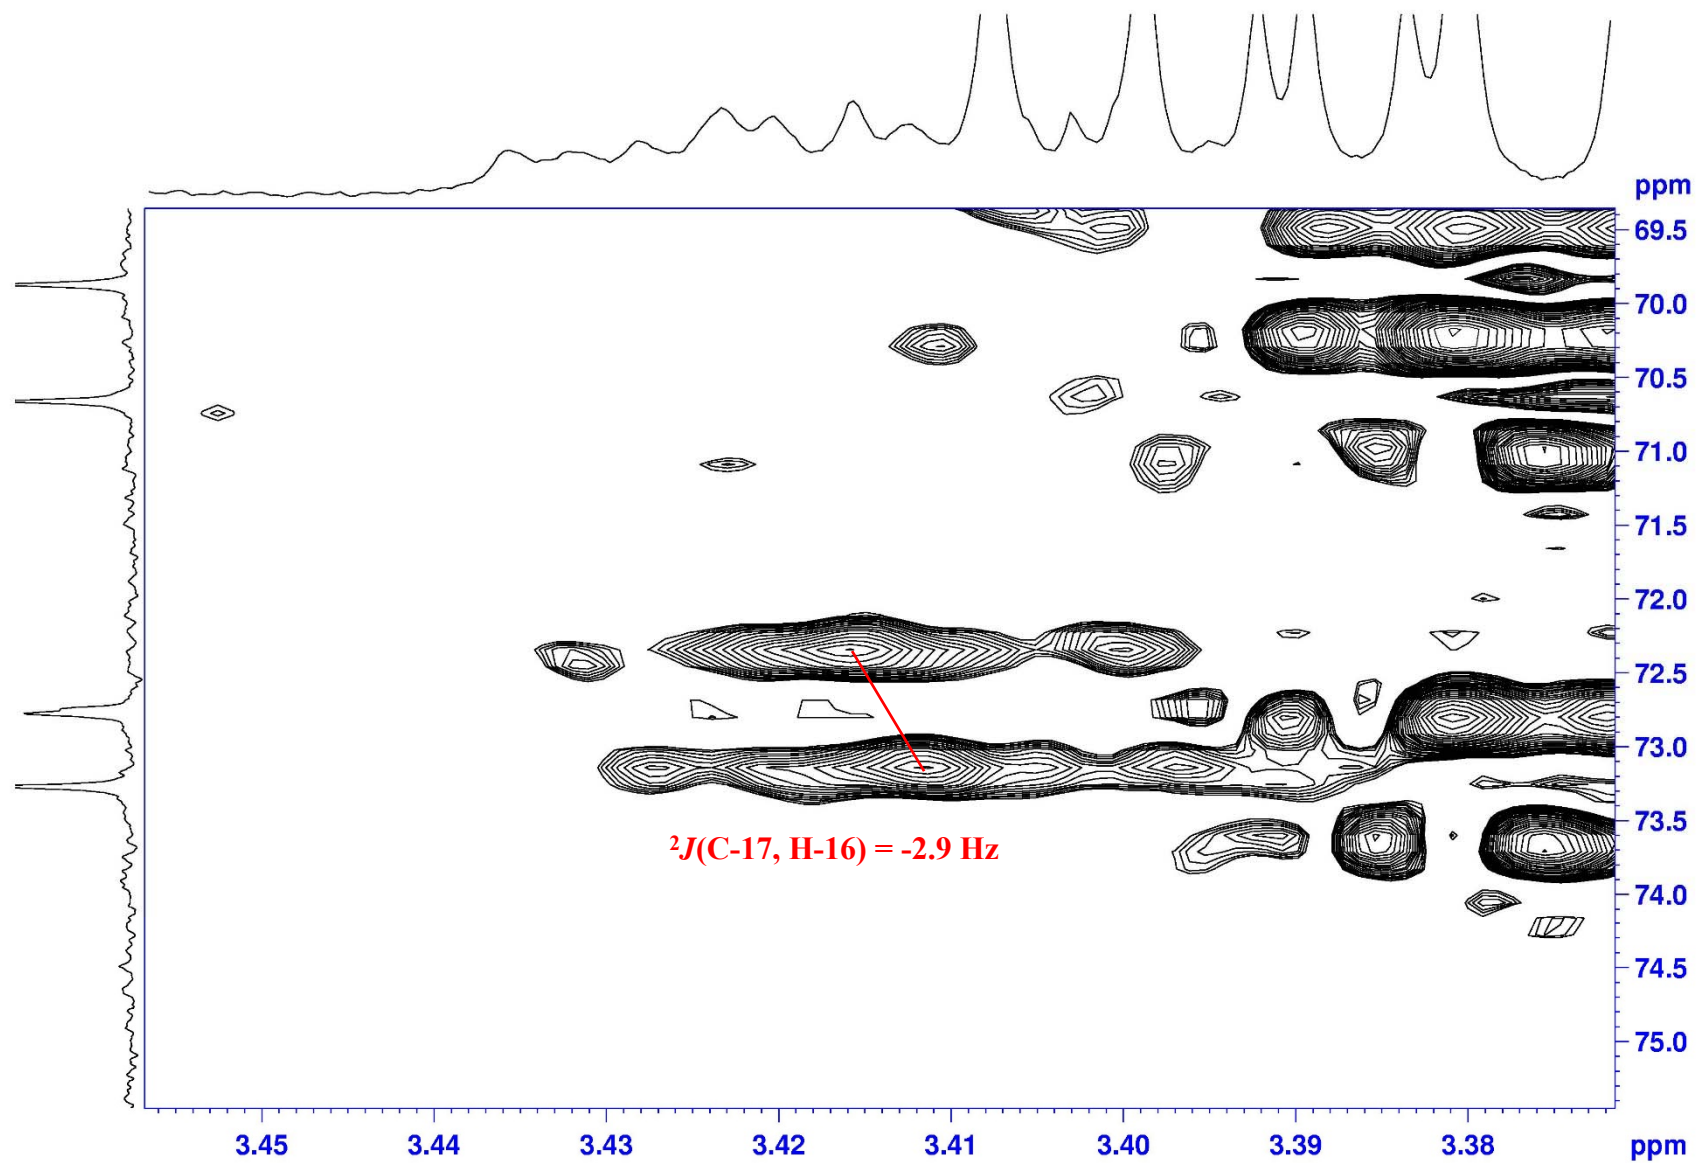



# HETLOC (700 MHz) spectrum of the fragment **1b** in CD<sub>3</sub>OD

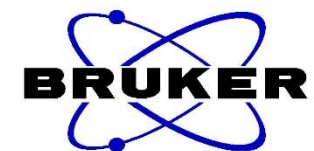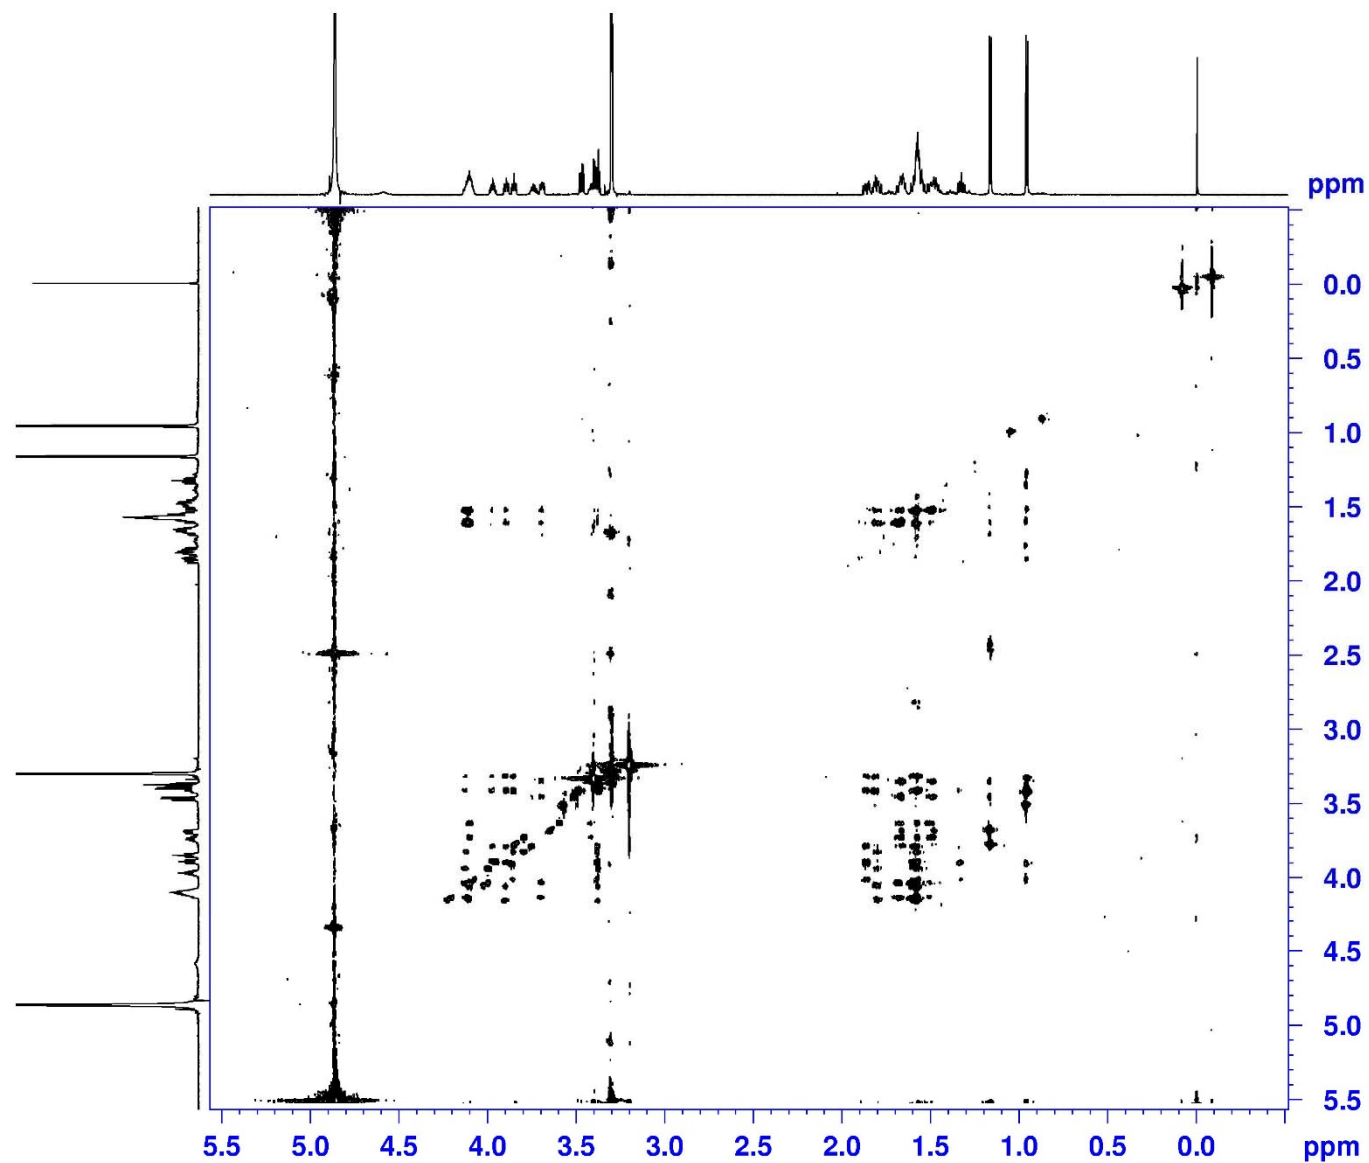

|         |                       |
|---------|-----------------------|
| NAME    | liwanshan-40-2-2-03-2 |
| EXPNO   | 23                    |
| PROCNO  | 1                     |
| Date_   | 20200325              |
| Time    | 22.38 h               |
| INSTRUM | spect                 |
| PROBHD  | Z120187_0028 {        |
| PULPROG | dipsi2etgppjcsix1     |
| TD      | 4096                  |
| SOLVENT | MeOD                  |
| NS      | 48                    |
| DS      | 16                    |
| SWH     | 4261.364 Hz           |
| FIDRES  | 2.080744 Hz           |
| AQ      | 0.4806473 sec         |
| RG      | 181.26                |
| DW      | 117.333 usec          |
| DE      | 10.00 usec            |
| TE      | 298.0 K               |
| CNST2   | 145.0000000           |
| CNST16  | 0.5000000             |
| D0      | 0.00000300 sec        |
| D1      | 1.00000000 sec        |
| D2      | 0.00344828 sec        |
| D4      | 0.00172414 sec        |
| D9      | 0.08000000 sec        |
| D11     | 0.03000000 sec        |
| D16     | 0.00020000 sec        |
| D20     | 0.00000300 sec        |
| D28     | 0.00000300 sec        |
| IN0     | 0.00011730 sec        |
| IN20    | 0.00005865 sec        |
| IN28    | 0.00005865 sec        |
| L1      | 28                    |
| ND0     | 2                     |
| TD      | 256                   |
| SF01    | 700.1818 MHz          |
| FIDRES  | 16.650682 Hz          |
| SW      | 6.088 ppm             |
| FnMODE  | Echo-Antiecho         |
| SI      | 8192                  |
| SF      | 700.1800227 MHz       |
| WDW     | QSINE                 |
| SSB     | 2                     |
| LB      | 0.00 Hz               |
| GB      | 0                     |
| PC      | 1.40                  |
| SI      | 1024                  |
| MC2     | echo-antiecho         |
| SF      | 700.1800262 MHz       |
| WDW     | QSINE                 |
| SSB     | 2                     |

HETLOC (700 MHz) spectrum of the fragment **1b** in CD<sub>3</sub>OD

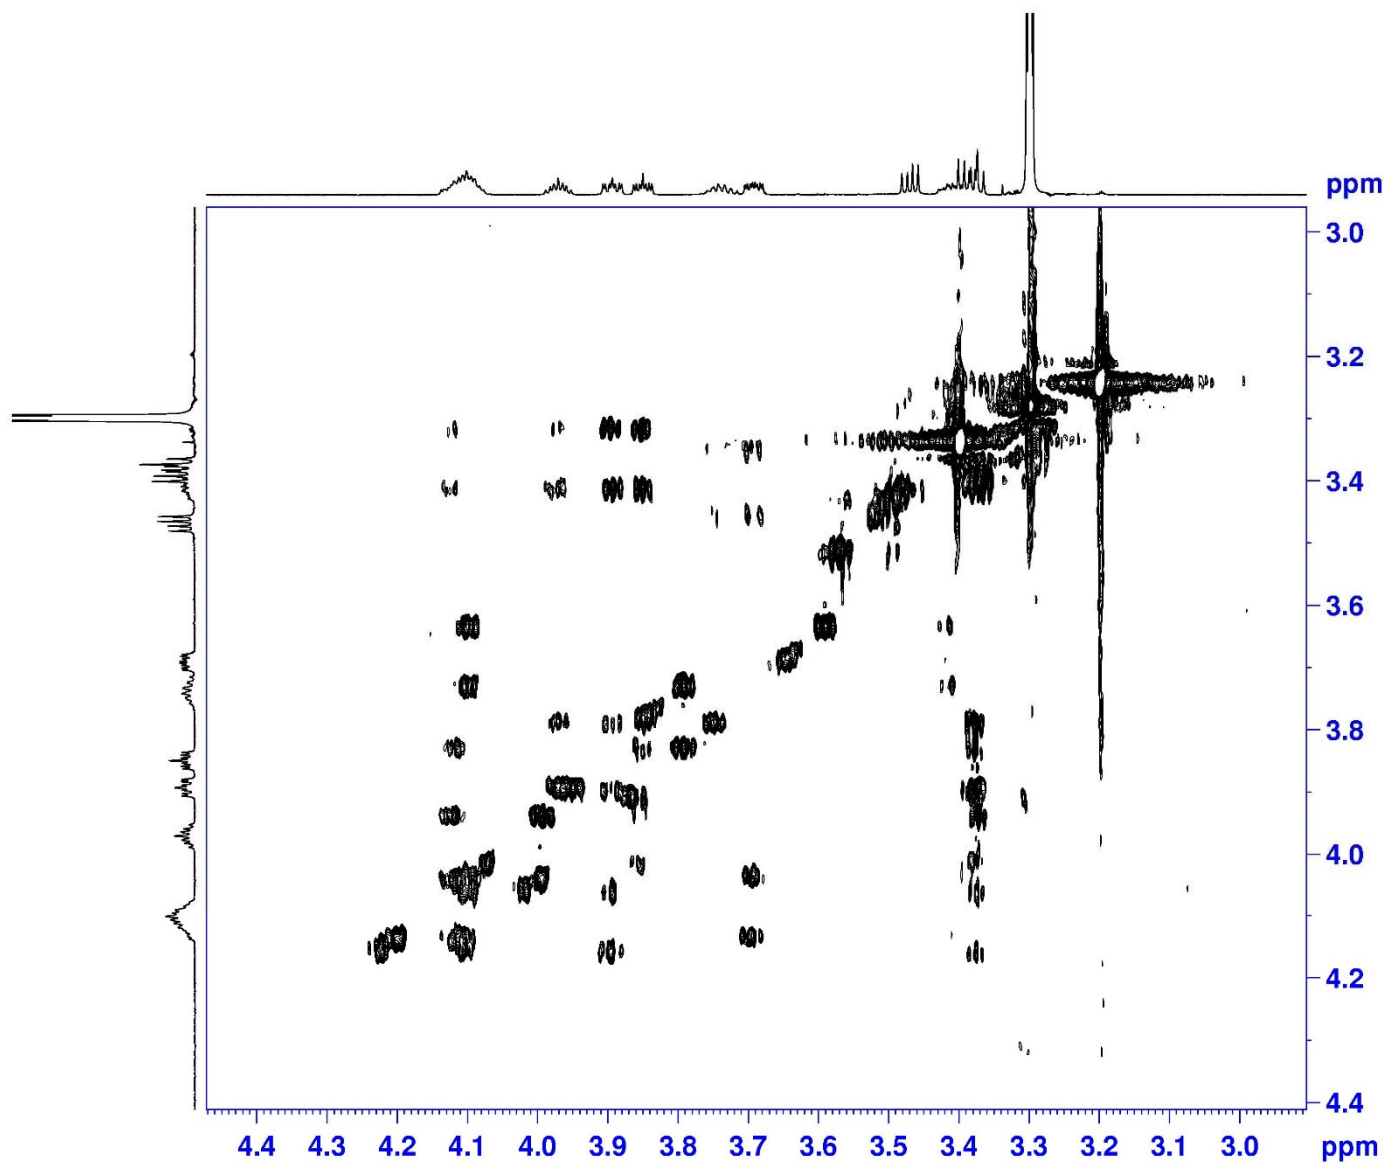

HETLOC (700 MHz) spectrum of the fragment **1b** in CD<sub>3</sub>OD

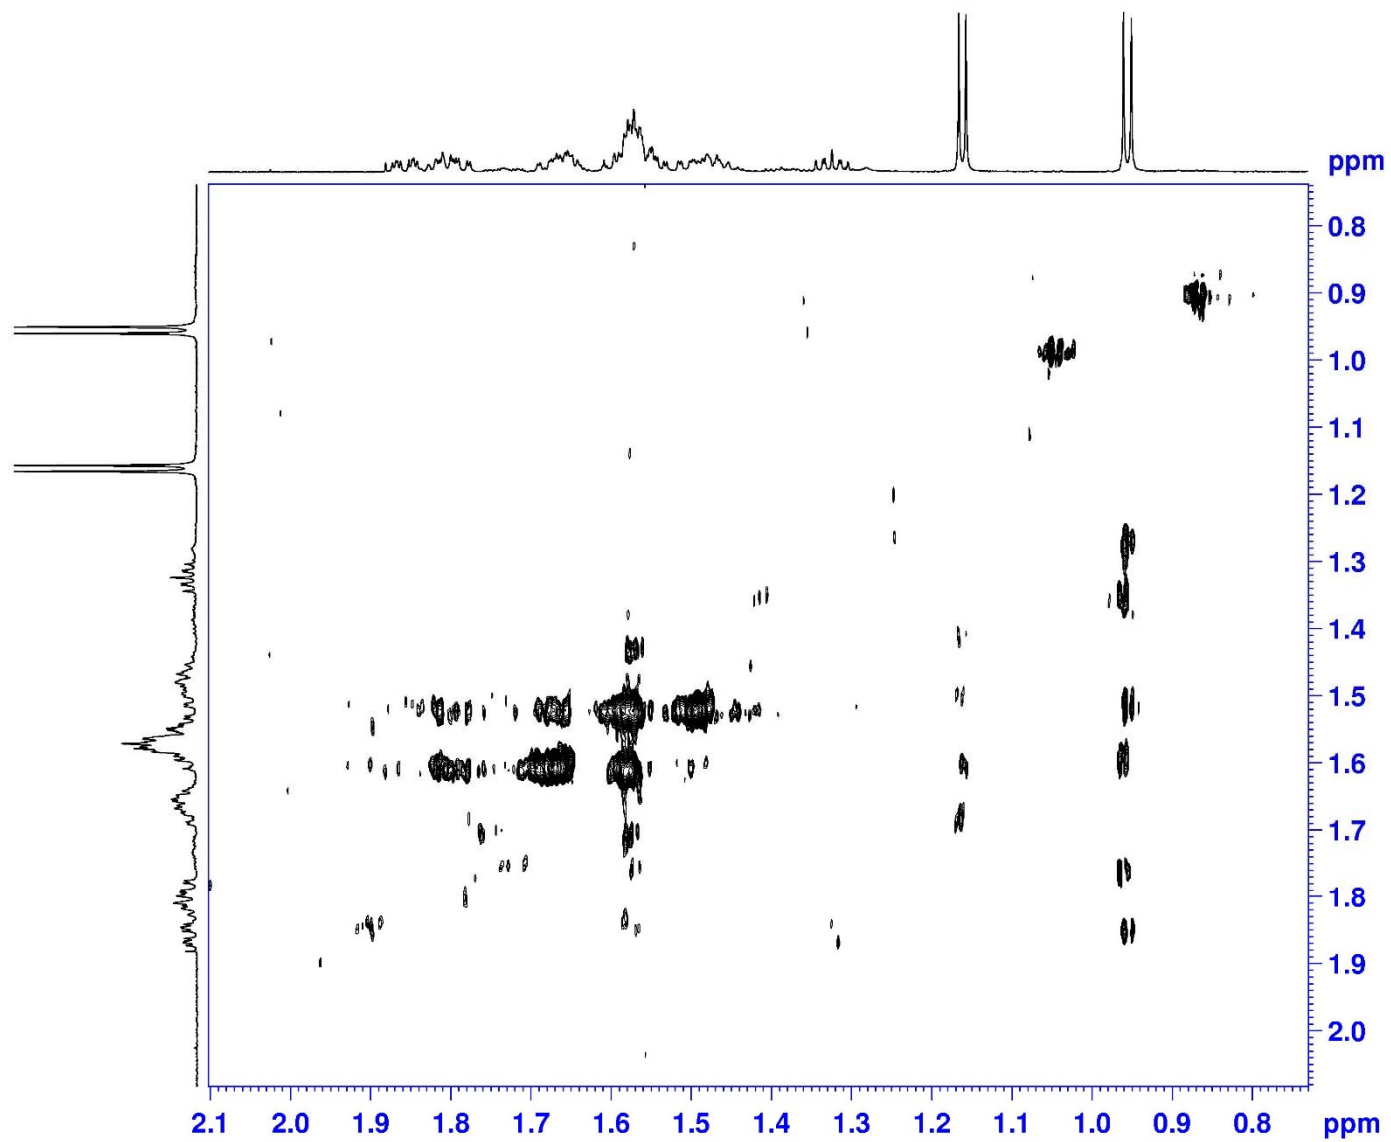

HETLOC (700 MHz) spectrum of the fragment **1b** in CD<sub>3</sub>OD

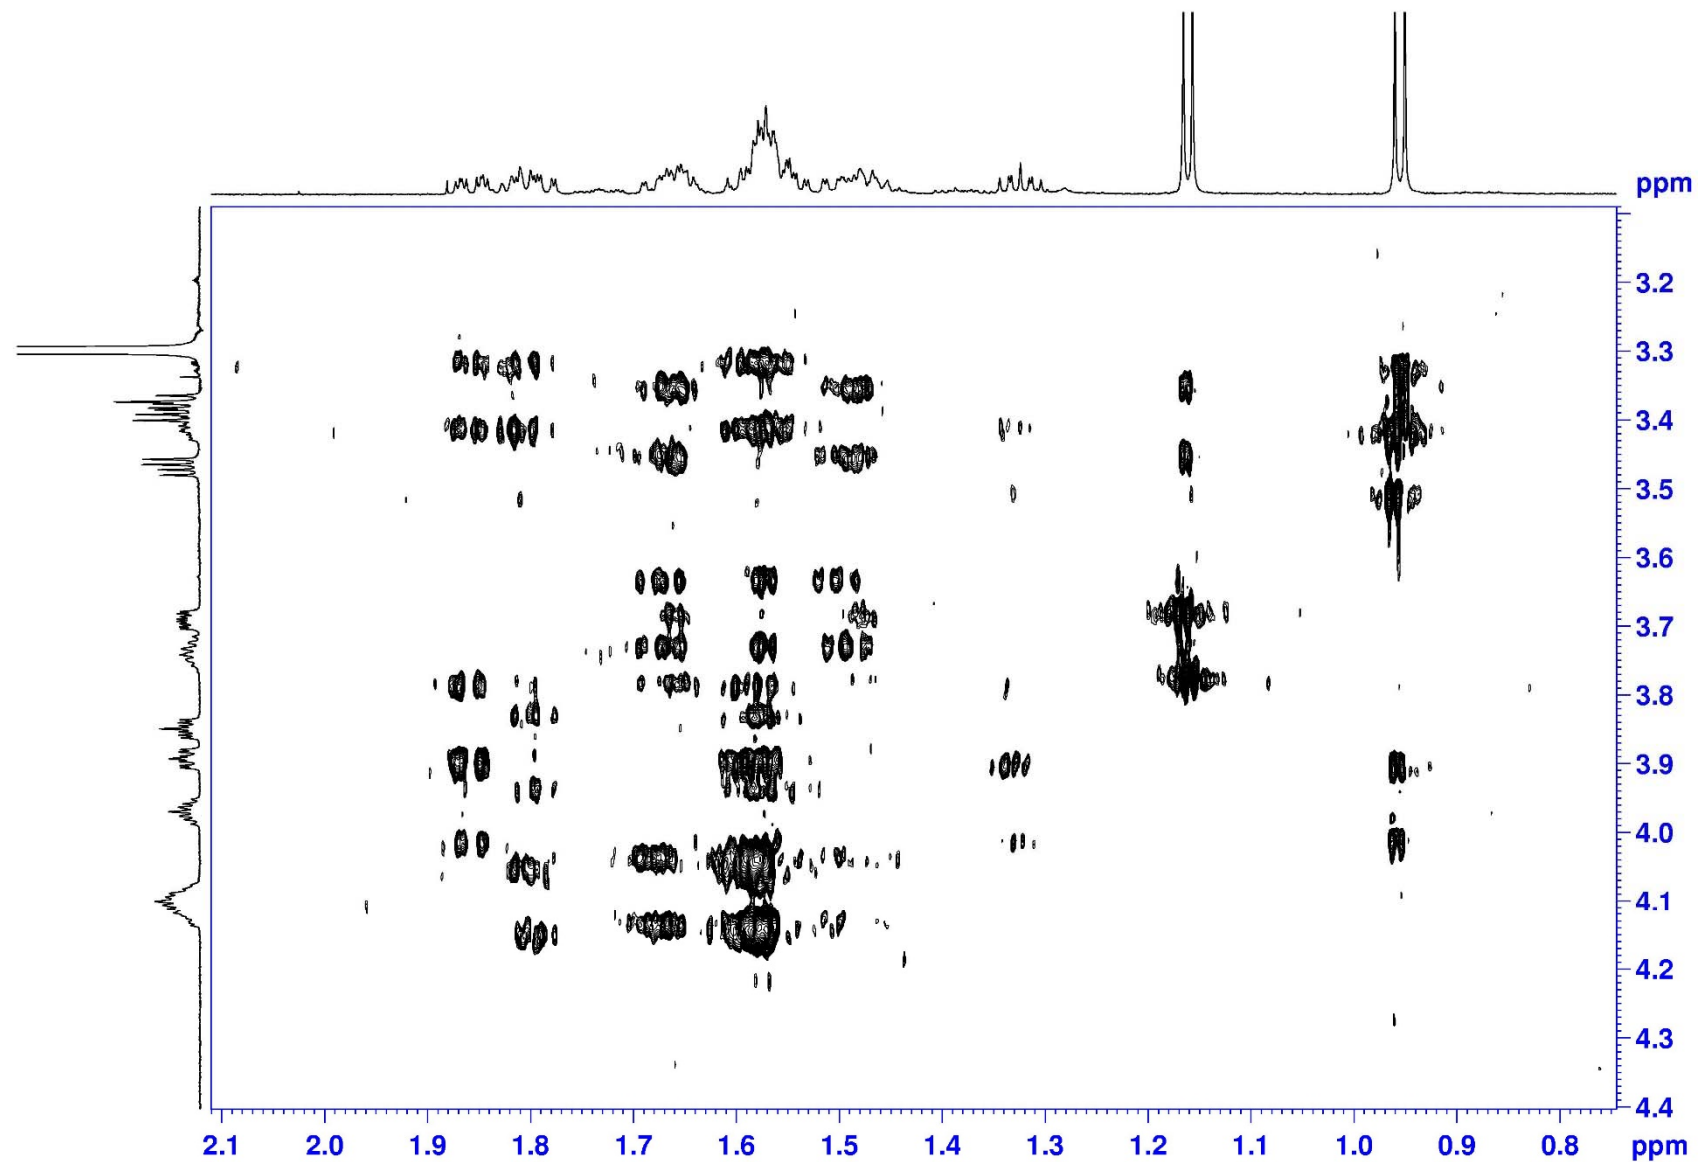

HETLOC (700 MHz) spectrum of the fragment **1b** in CD<sub>3</sub>OD

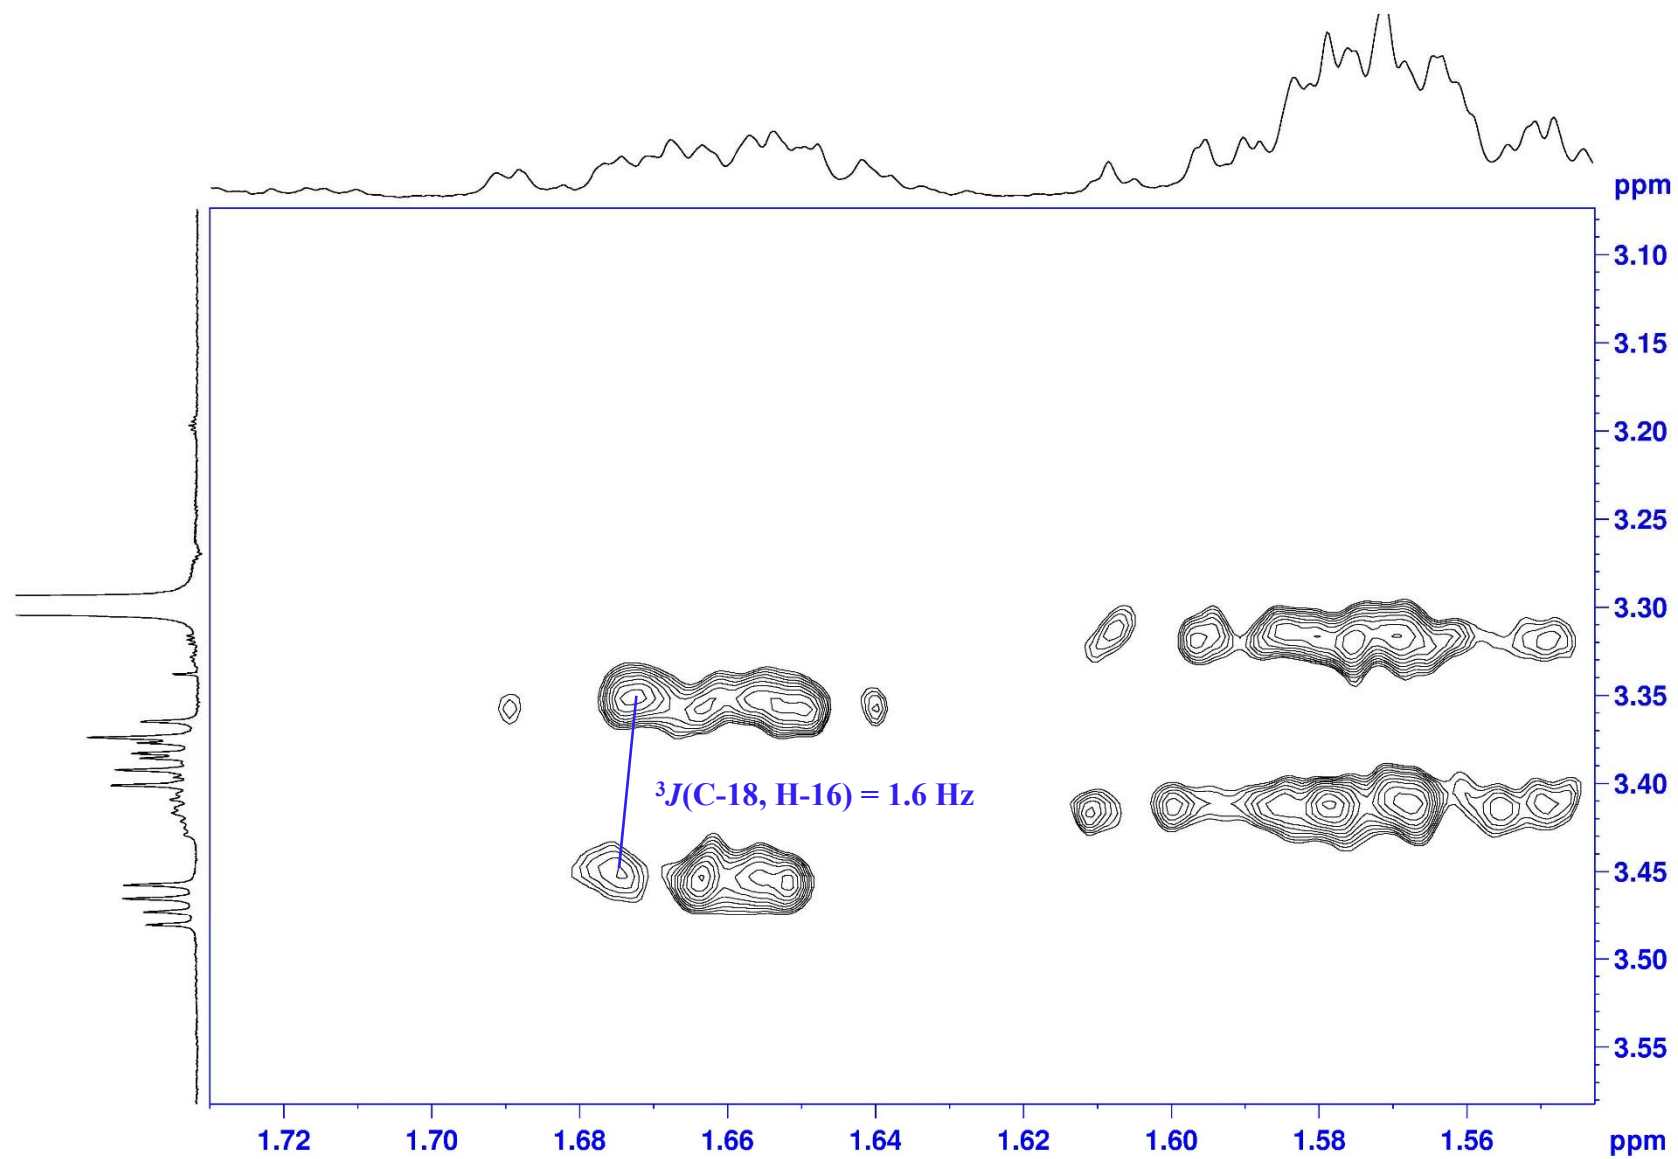

HETLOC (700 MHz) spectrum of the fragment **1b** in CD<sub>3</sub>OD

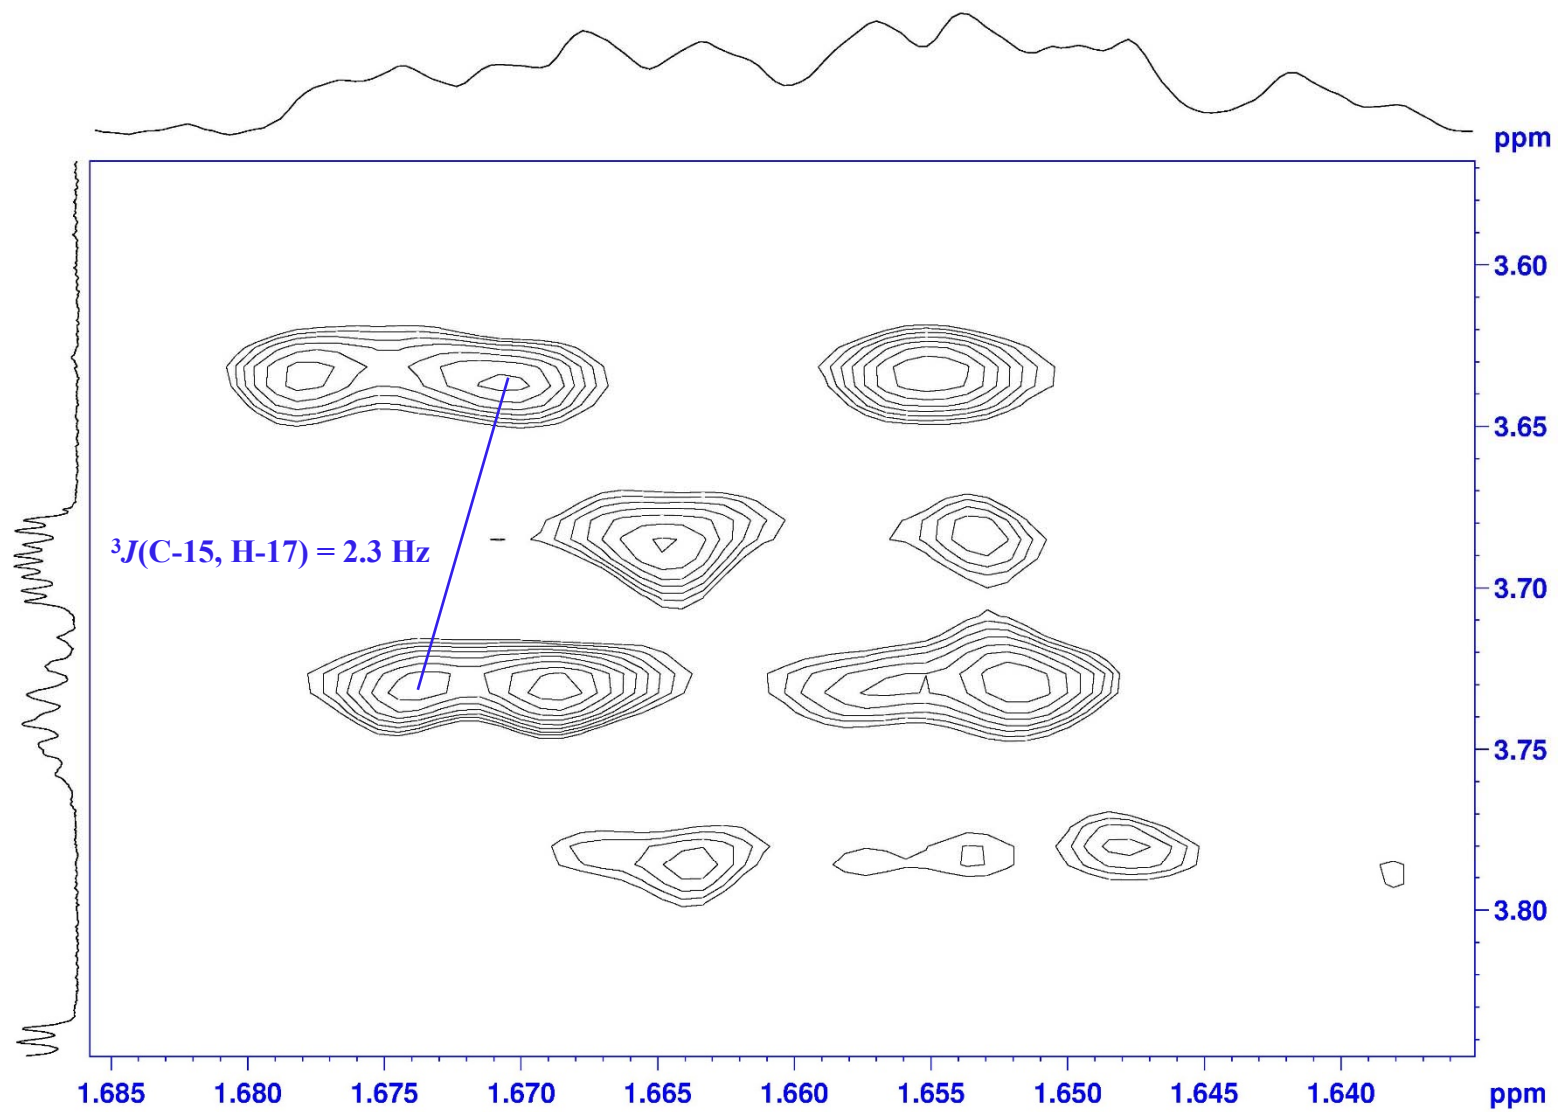

HETLOC (700 MHz) spectrum of the fragment **1b** in CD<sub>3</sub>OD

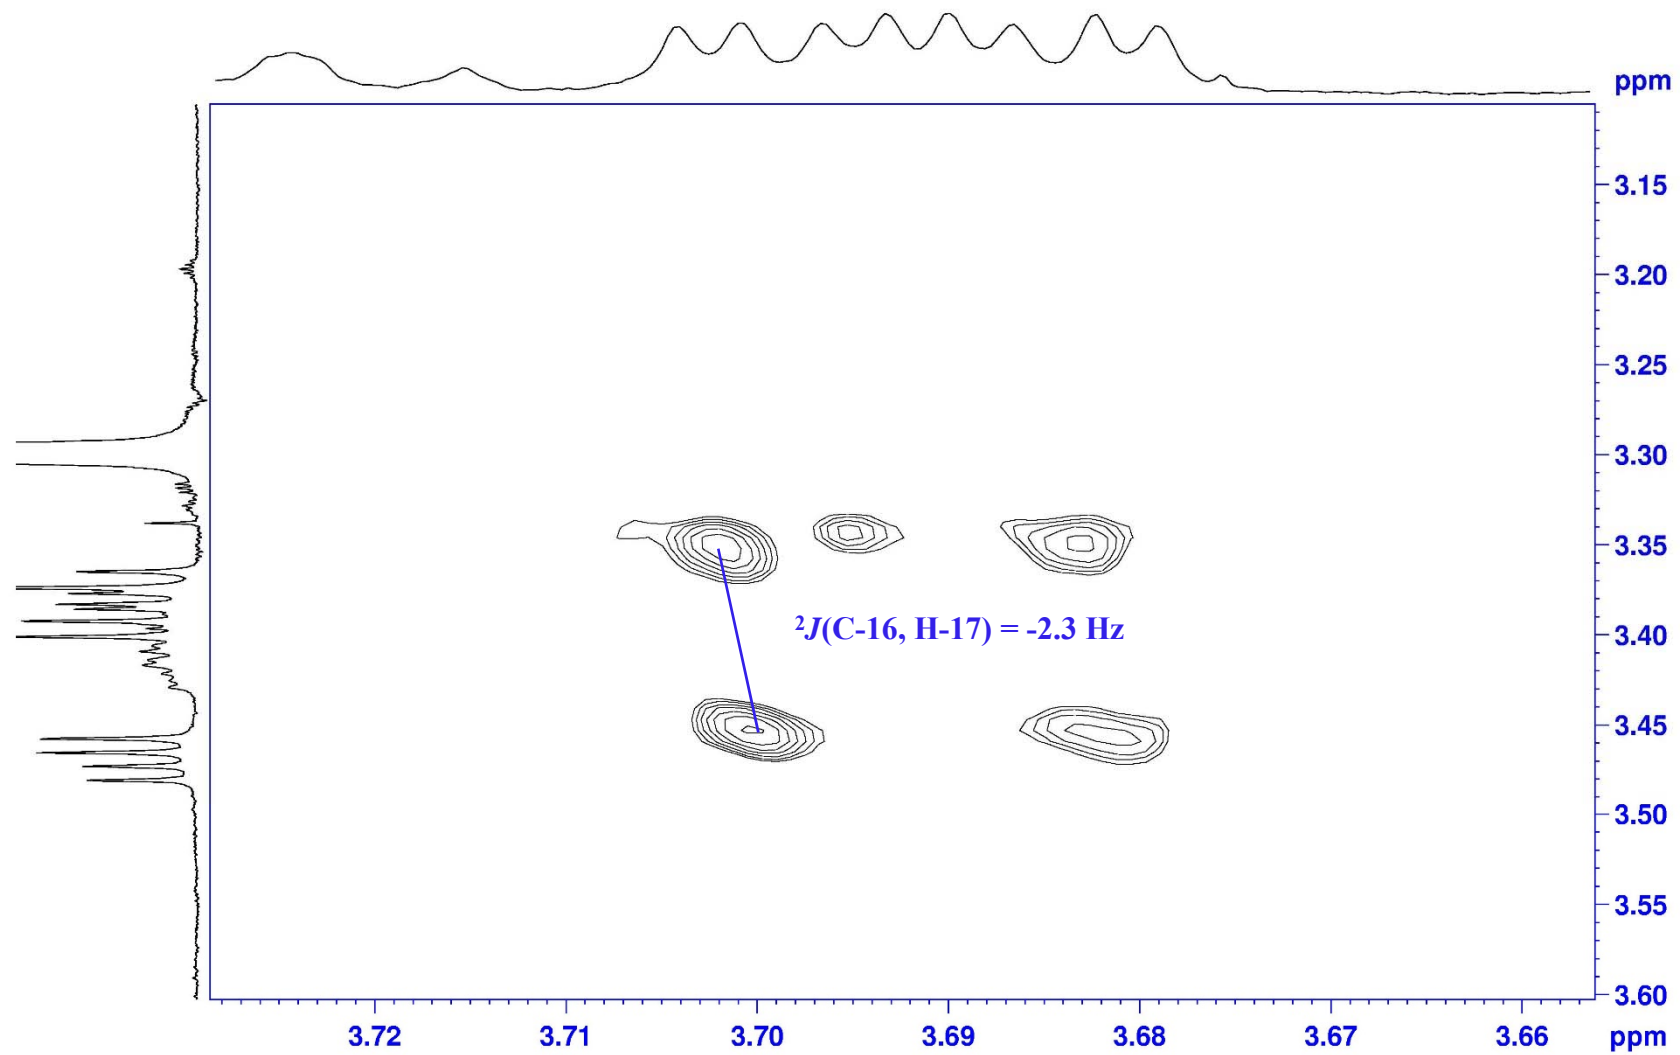

HETLOC (700 MHz) spectrum of the fragment **1b** in CD<sub>3</sub>OD

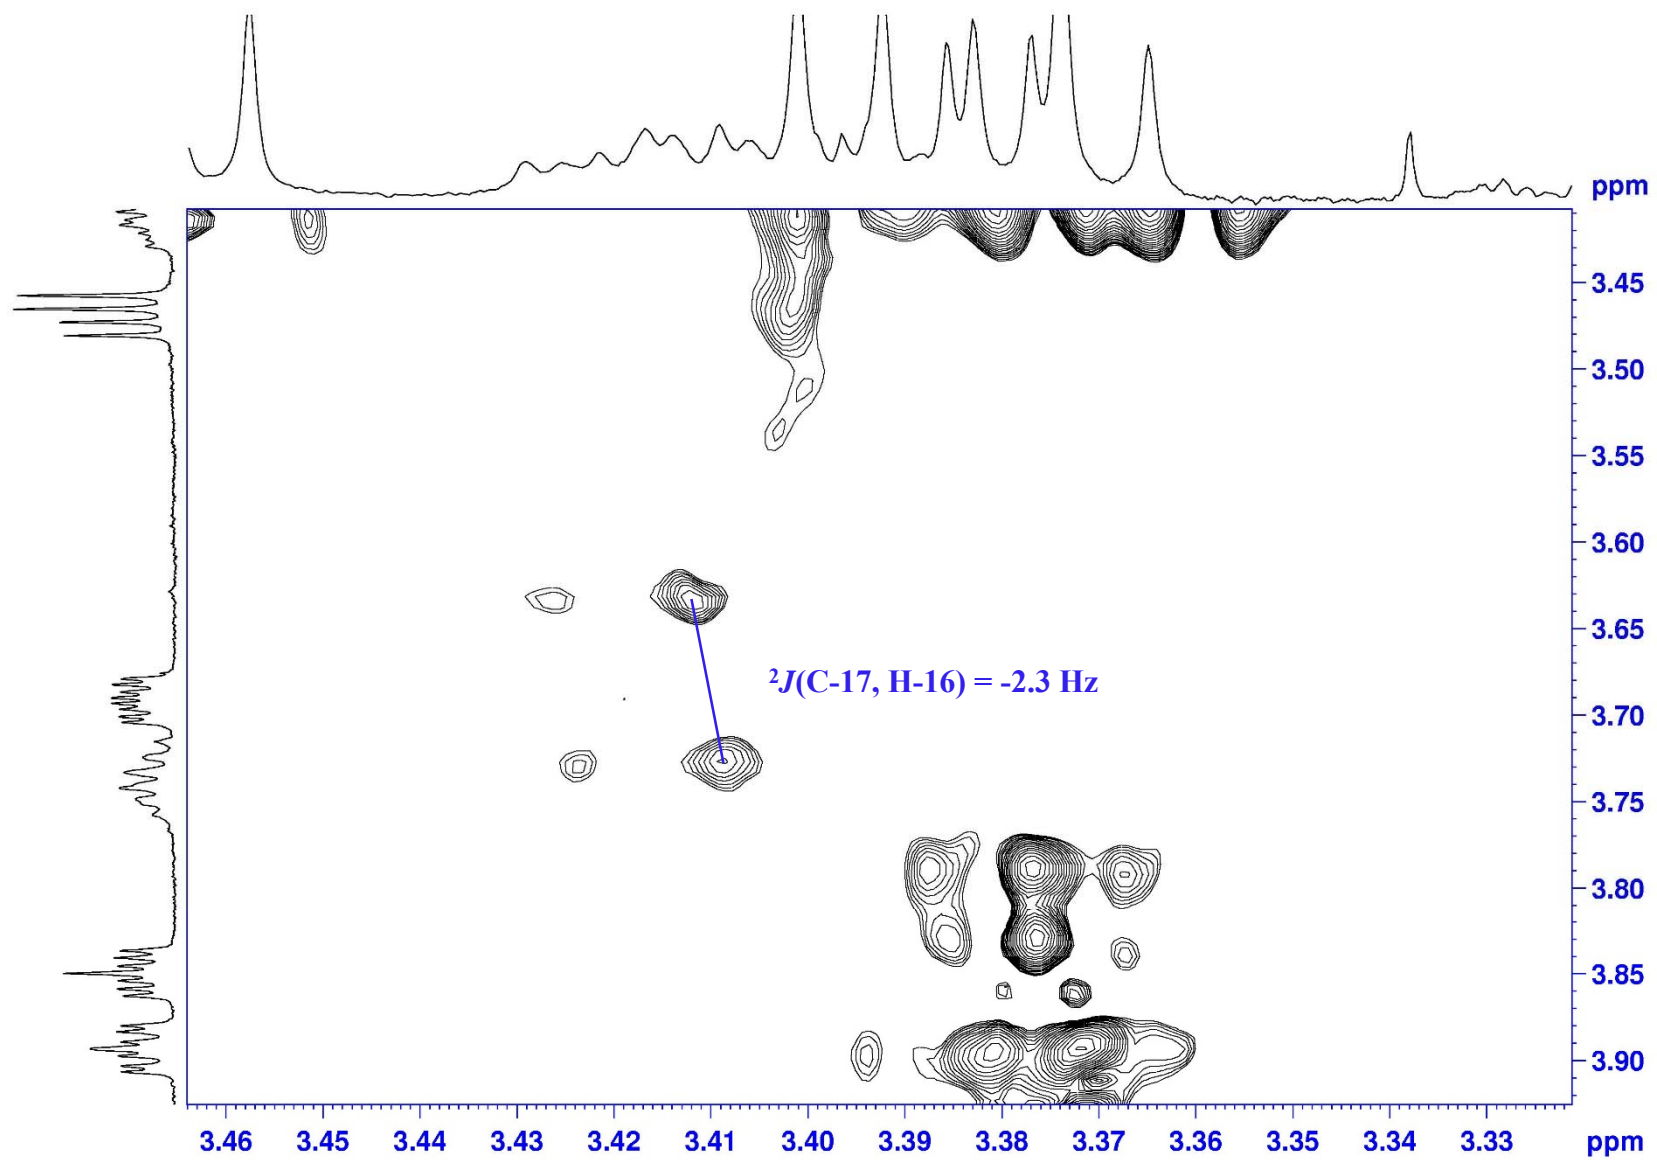



# LR-ESI-MS for the fragment **1c**

## Generic Display Report

### Analysis Info

Analysis Name     D:\Data\amaZon SL\MS\data\202007\jiangzhongping\_40-2-2-O3-3\_67\_01\_1957.d     Acquisition Date     2020-07-13 15:56:49  
Method            1957.m     Operator            bruker  
Sample Name       jiangzhongping\_40-2-2-O3-3     Instrument           amaZon SL  
Comment

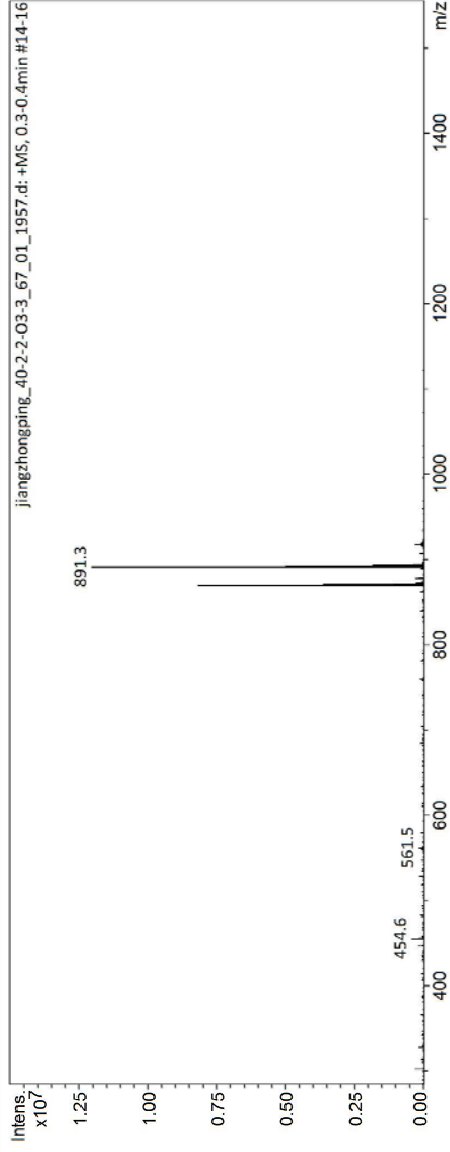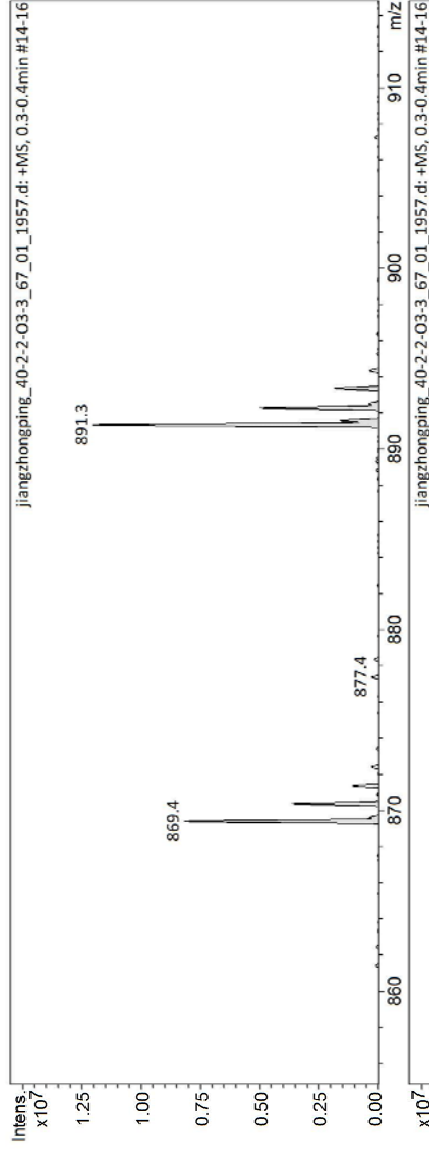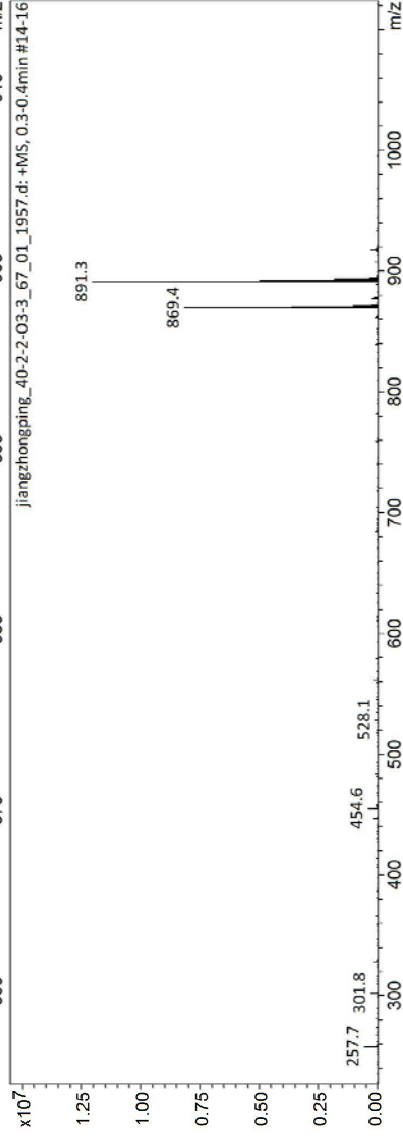

$^1\text{H}$  (700 MHz) NMR spectrum of the fragment **1c** in  $\text{CD}_3\text{OD}$

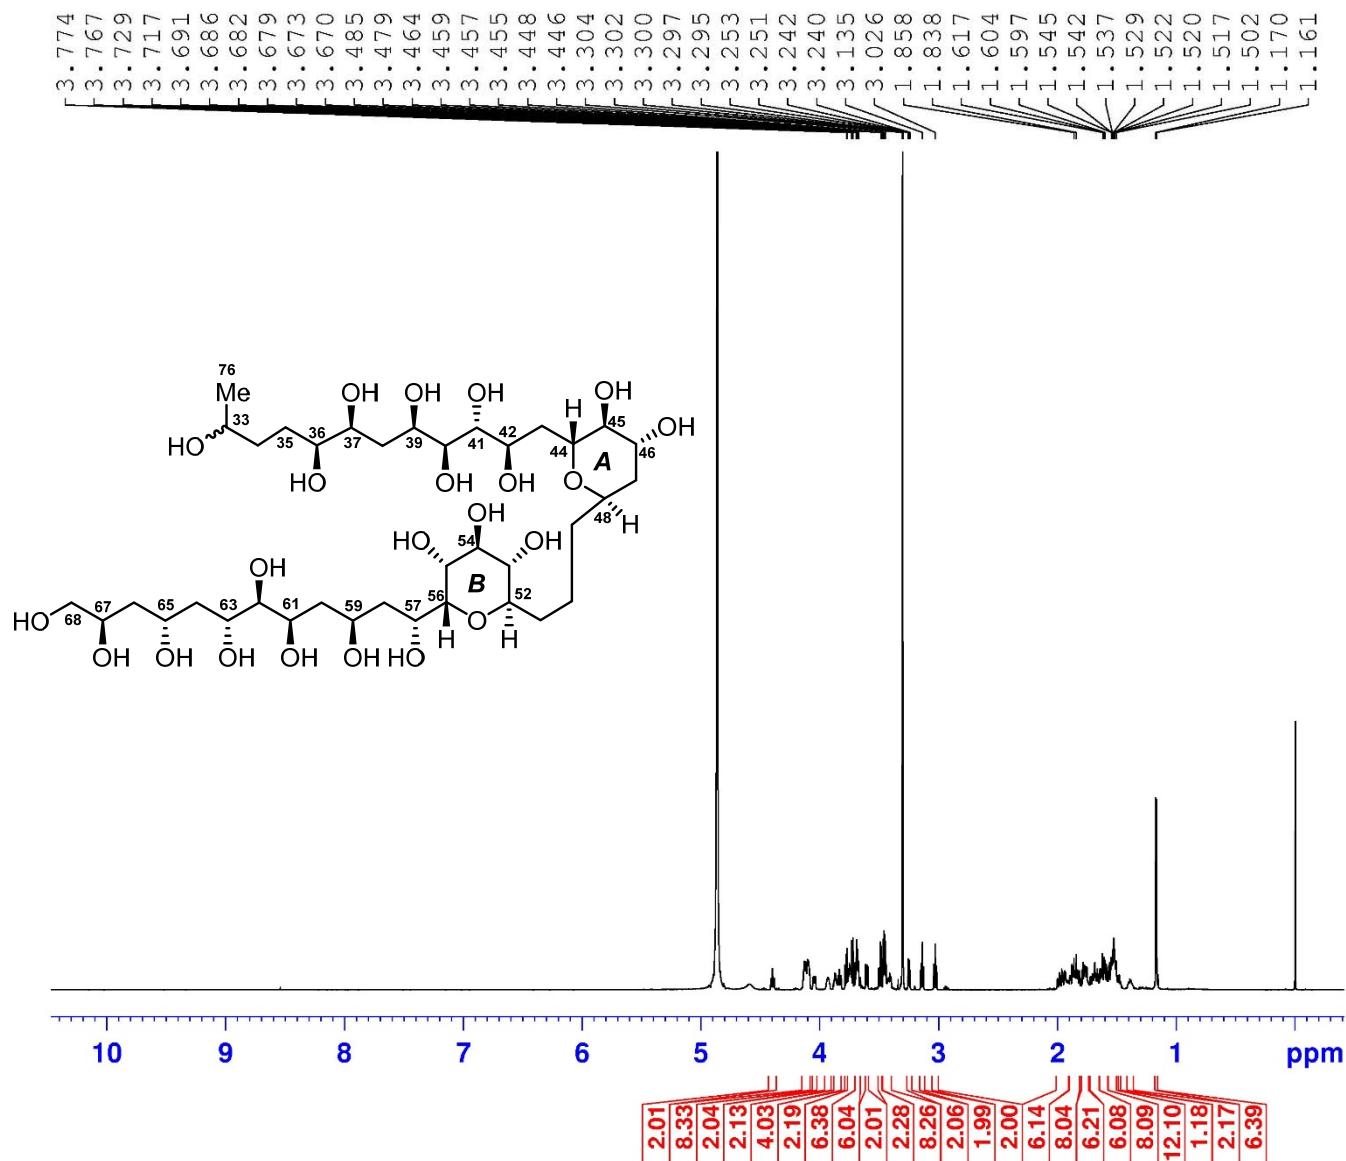

```

NAME      liwanshan-40-2-2-03-
EXPNO     12
PROCNO    1
Date_     20200321
Time      14.57 h
INSTRUM   spect
PROBHD    z120187_0028 (
PULPROG   zg30
TD         65536
SOLVENT   MeOD
NS         32
DS         2
SWH        14097.744 Hz
FIDRES     0.430229 Hz
AQ         2.3243935 sec
RG         4.29
DW         35.467 usec
DE         10.00 usec
TE         298.0 K
D1         1.50000000 sec
TD0        1
SF01       700.1843236 MHz
NUC1       1H
P1         7.55 usec
SI         65536
SF         700.1800209 MHz
WDW        EM
SSB        0
LB         0.30 Hz
GB         0
PC         1.00
    
```

$^1\text{H}$  (700 MHz) NMR spectrum of the fragment **1c** in  $\text{CD}_3\text{OD}$

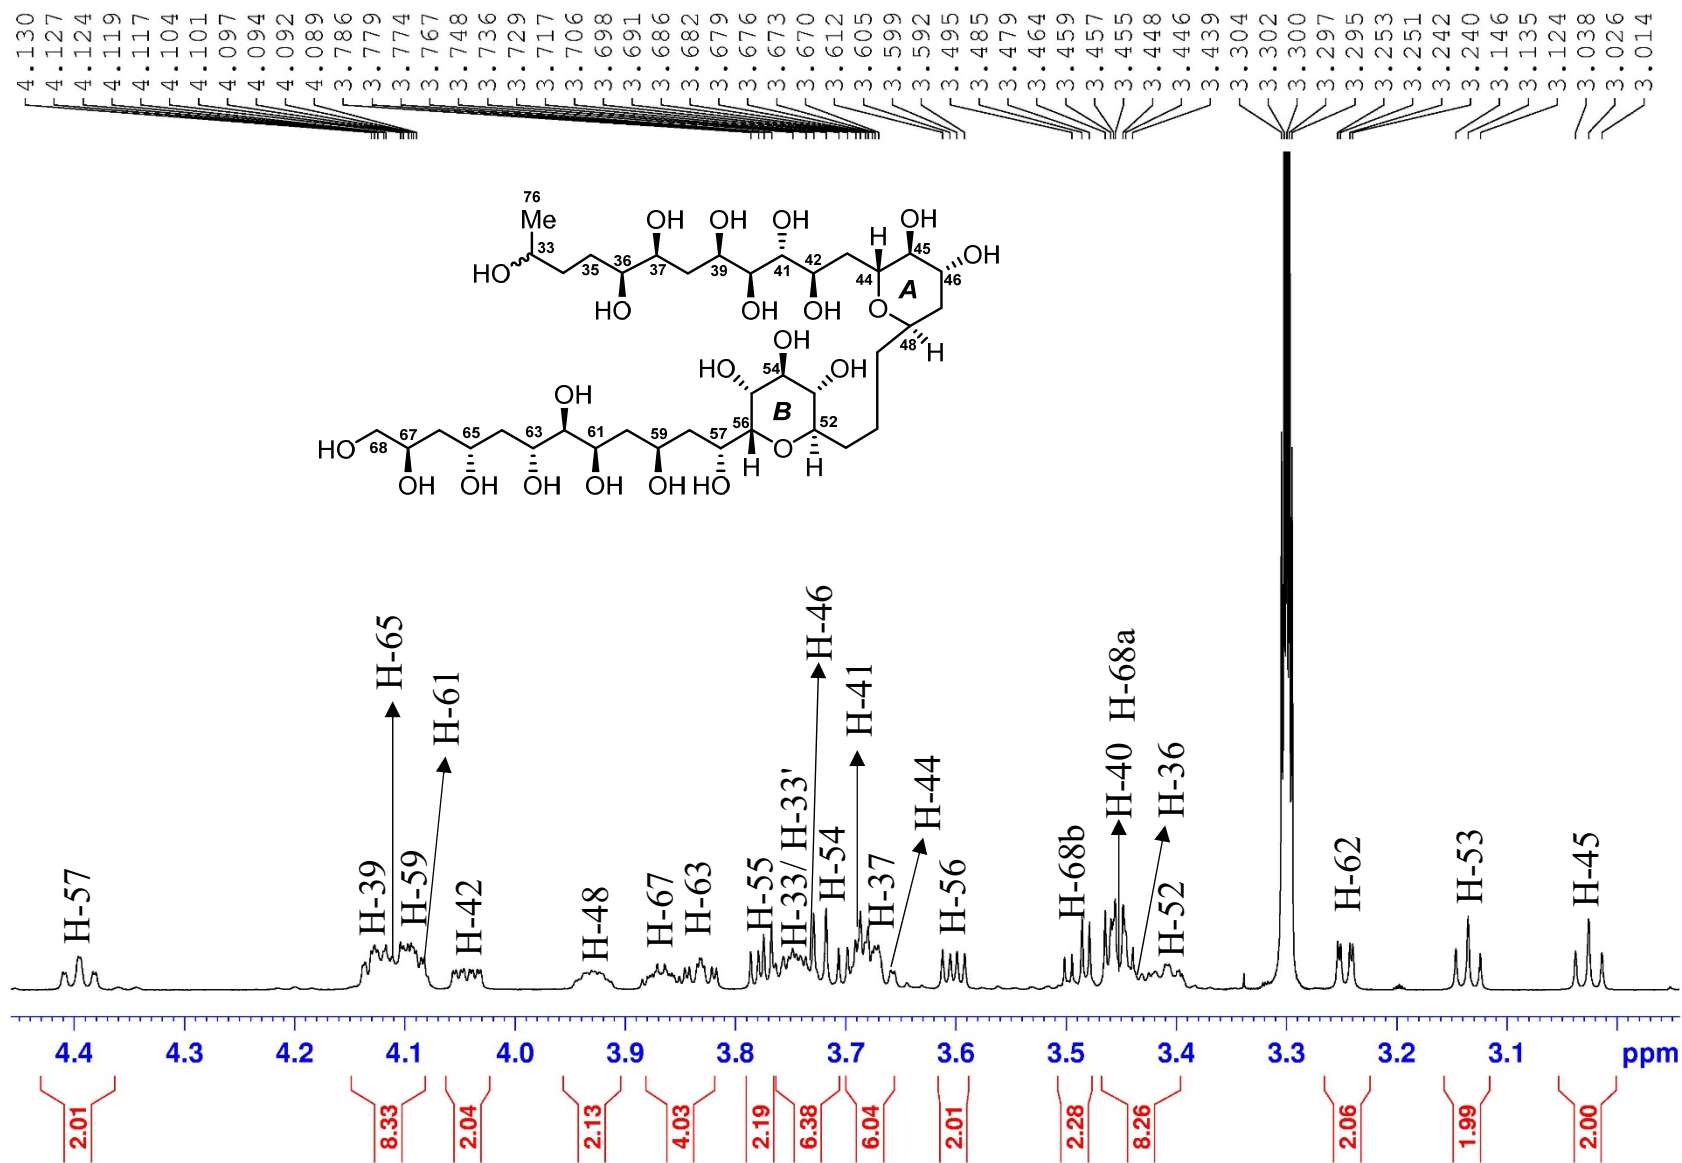

$^1\text{H}$  (700 MHz) NMR spectrum of the fragment **1c** in  $\text{CD}_3\text{OD}$

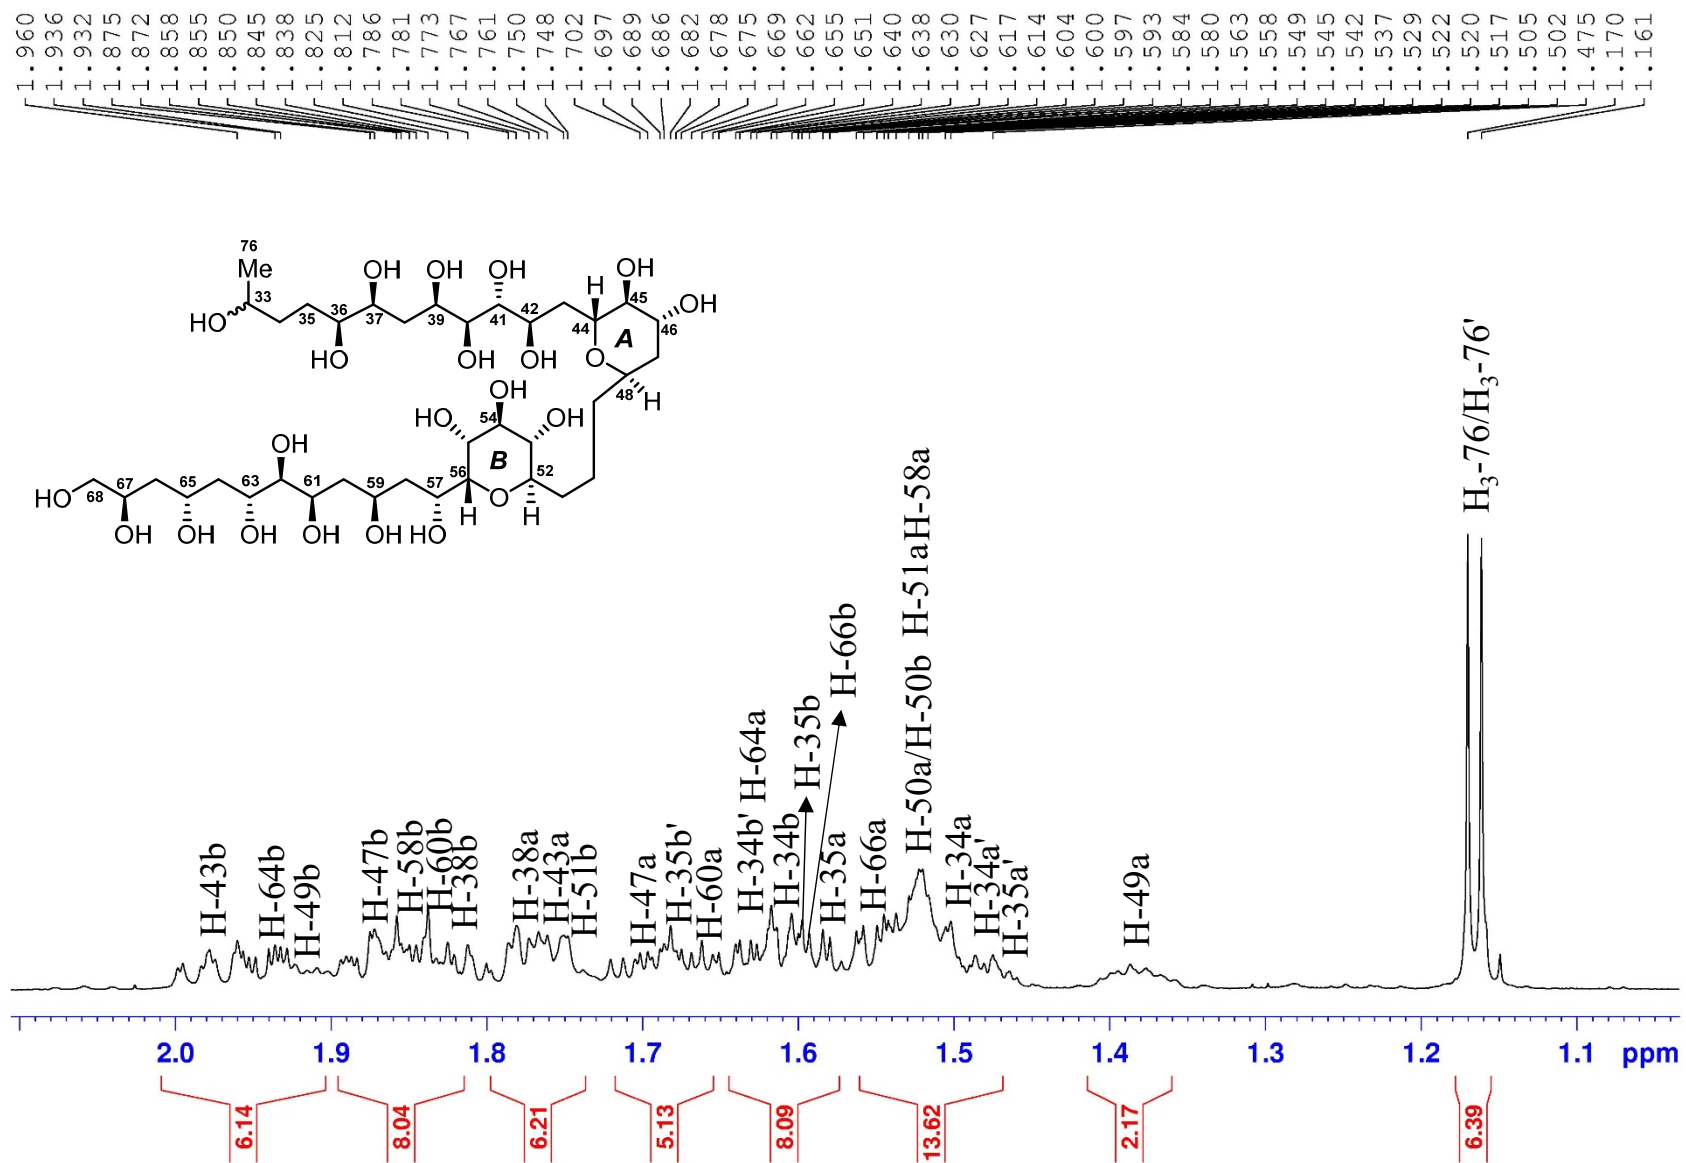

$^{13}\text{C}$  (175 MHz) NMR spectrum of the fragment **1c** in  $\text{CD}_3\text{OD}$

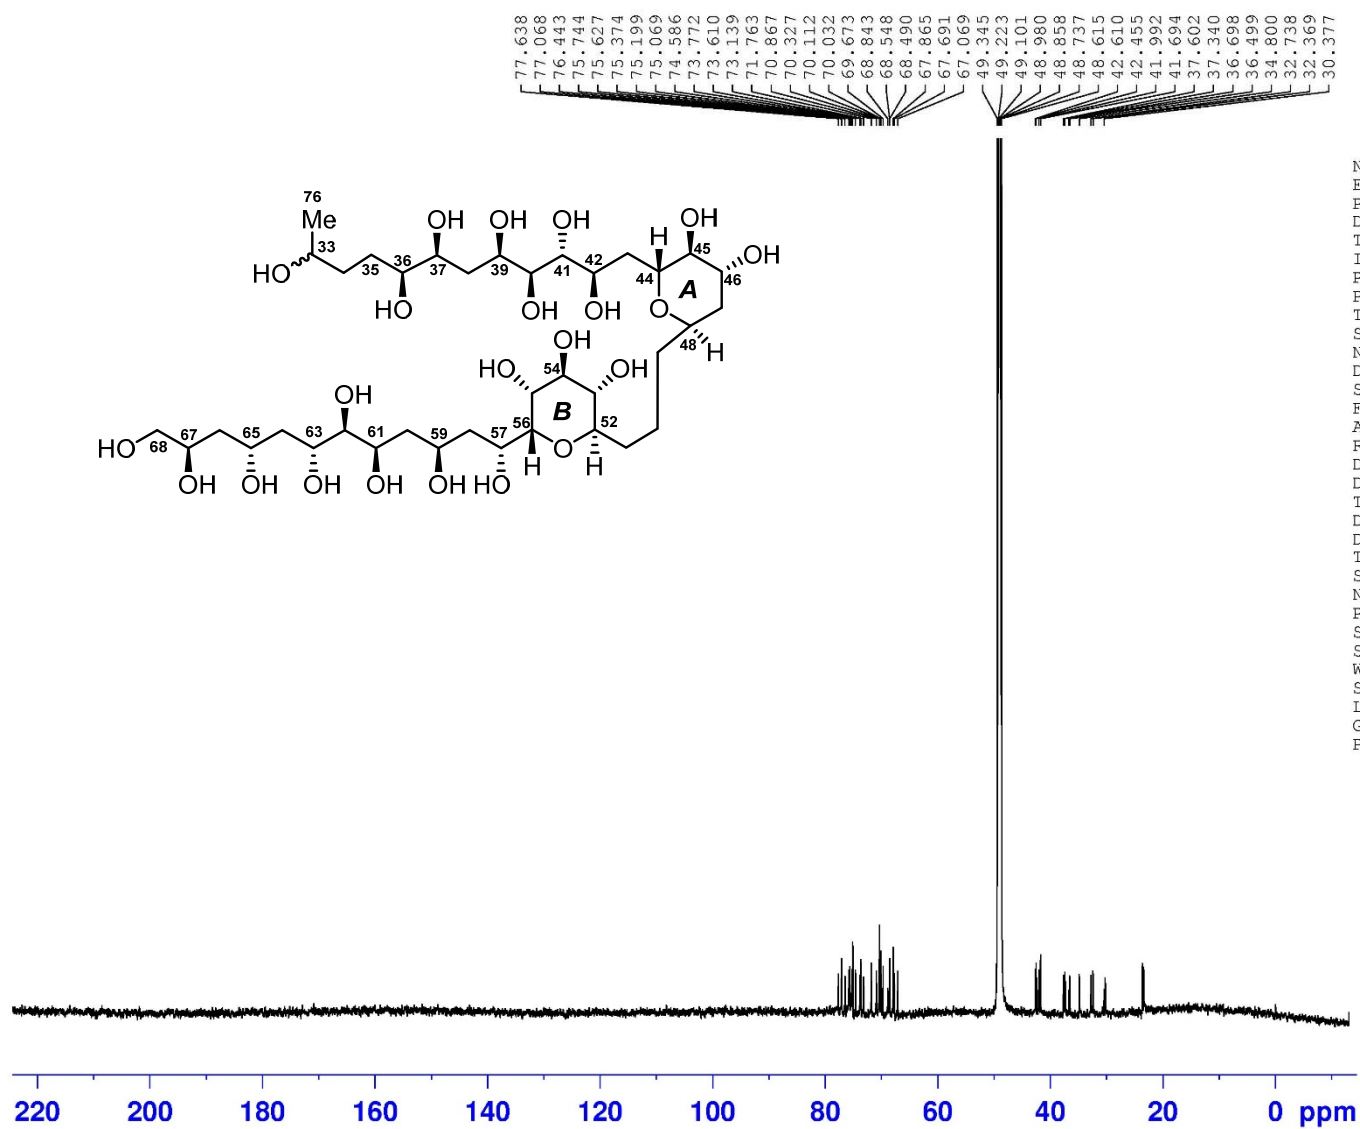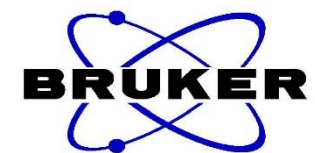

```

NAME      liwanshan-40-2-2-03-3
EXPNO     13
PROCNO    1
Date_     20200321
Time      18.58 h
INSTRUM   spect
PROBHD    Z120187_0028 (
PULPROG   zgpg30
TD         32768
SOLVENT   MeOD
NS         10000
DS         8
SWH        43859.648 Hz
FIDRES     2.676980 Hz
AQ         0.3736052 sec
RG         181.26
DW         11.400 usec
DE         18.00 usec
TE         298.0 K
D1         1.00000000 sec
D11        0.03000000 sec
TD0        1
SF01       176.0797677 MHz
NUC1       13C
P1         11.90 usec
SI         32768
SF         176.0601577 MHz
WDW        EM
SSB        0
LB         5.00 Hz
GB         0
PC         1.40
    
```

$^{13}\text{C}$  (175 MHz) NMR spectrum of the fragment **1c** in  $\text{CD}_3\text{OD}$

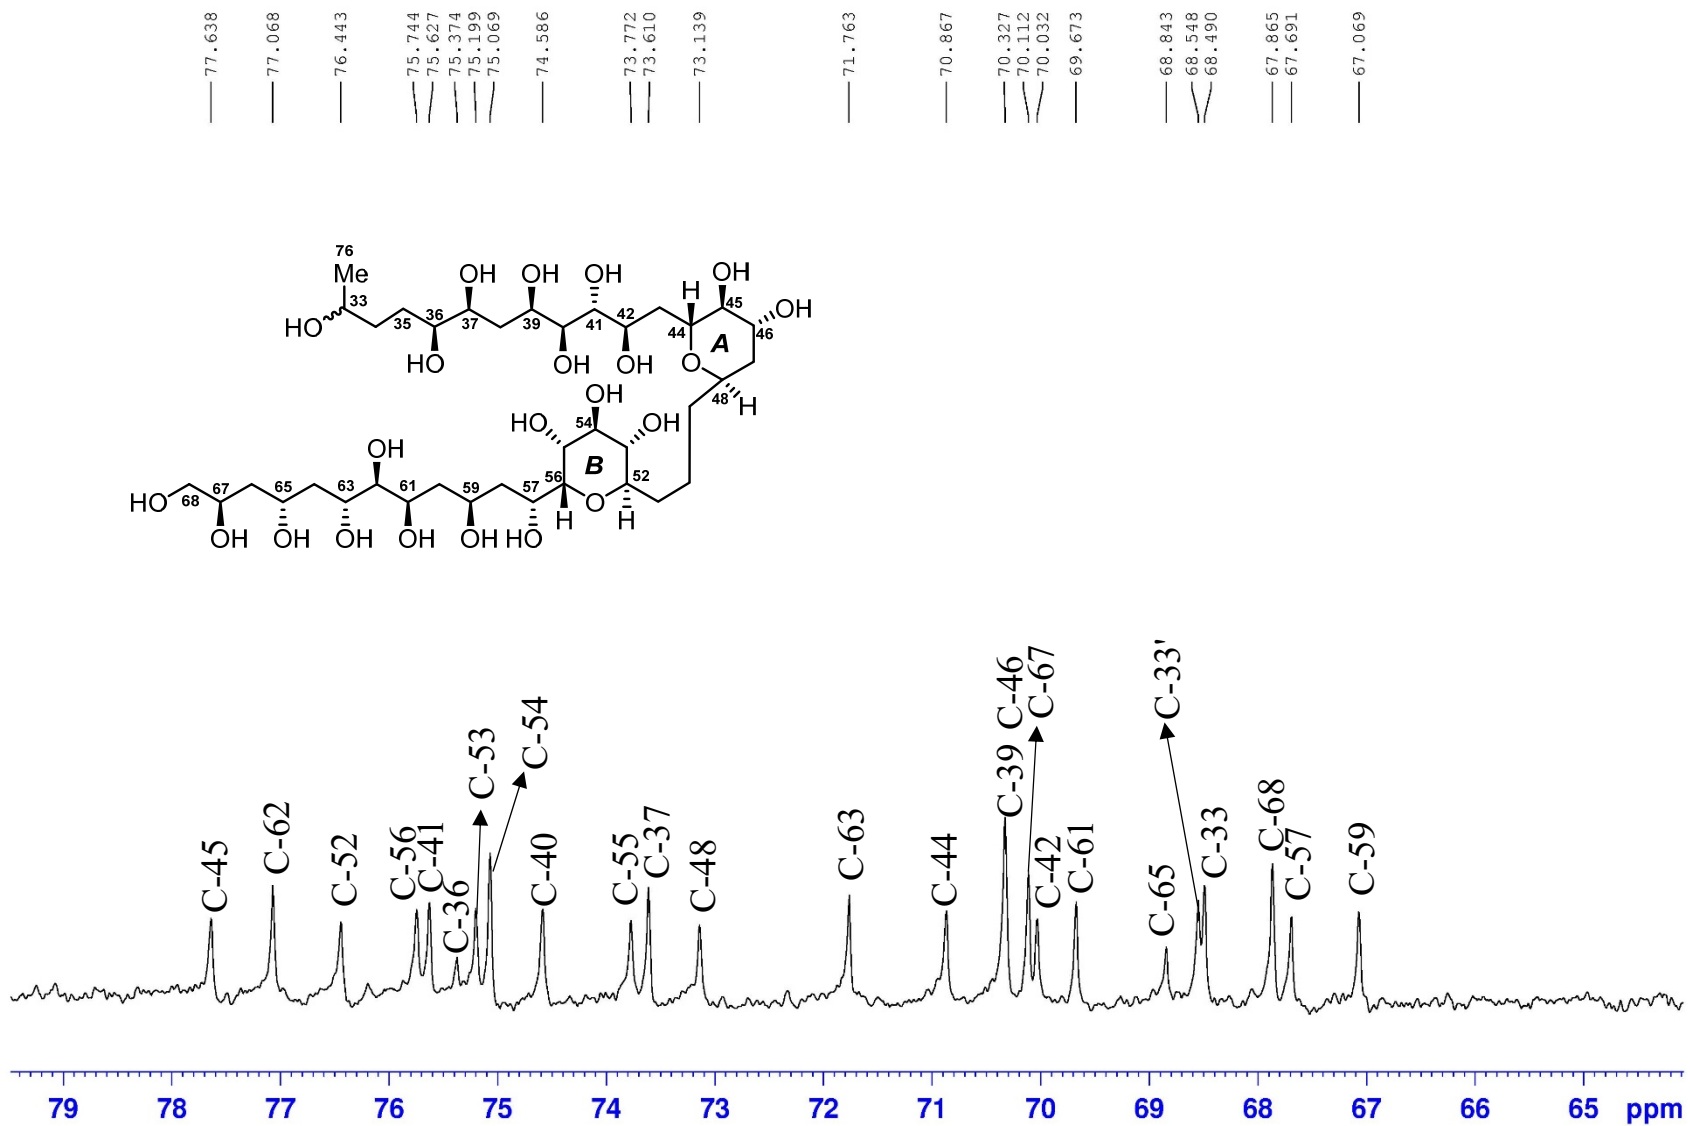

$^{13}\text{C}$  (175 MHz) NMR spectrum of the fragment **1c** in  $\text{CD}_3\text{OD}$

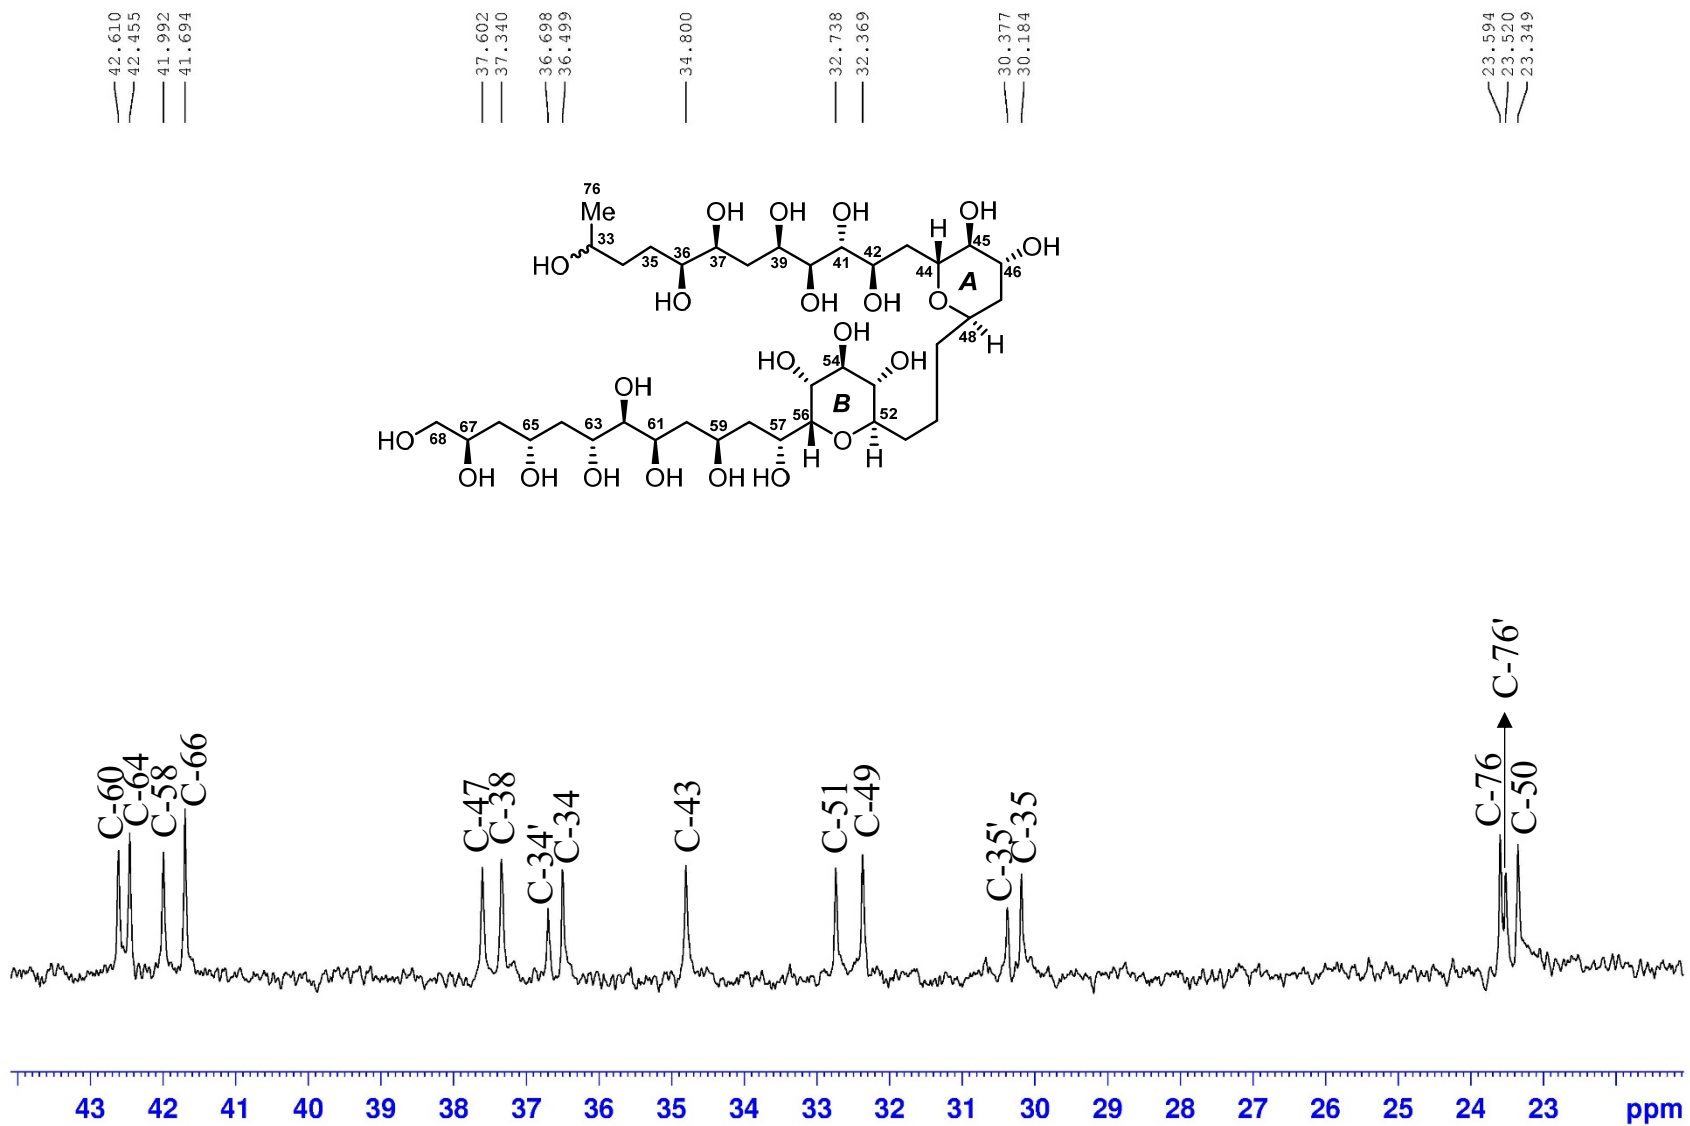

# DEPT135 (175 MHz) spectrum of the fragment **1c** in CD<sub>3</sub>OD

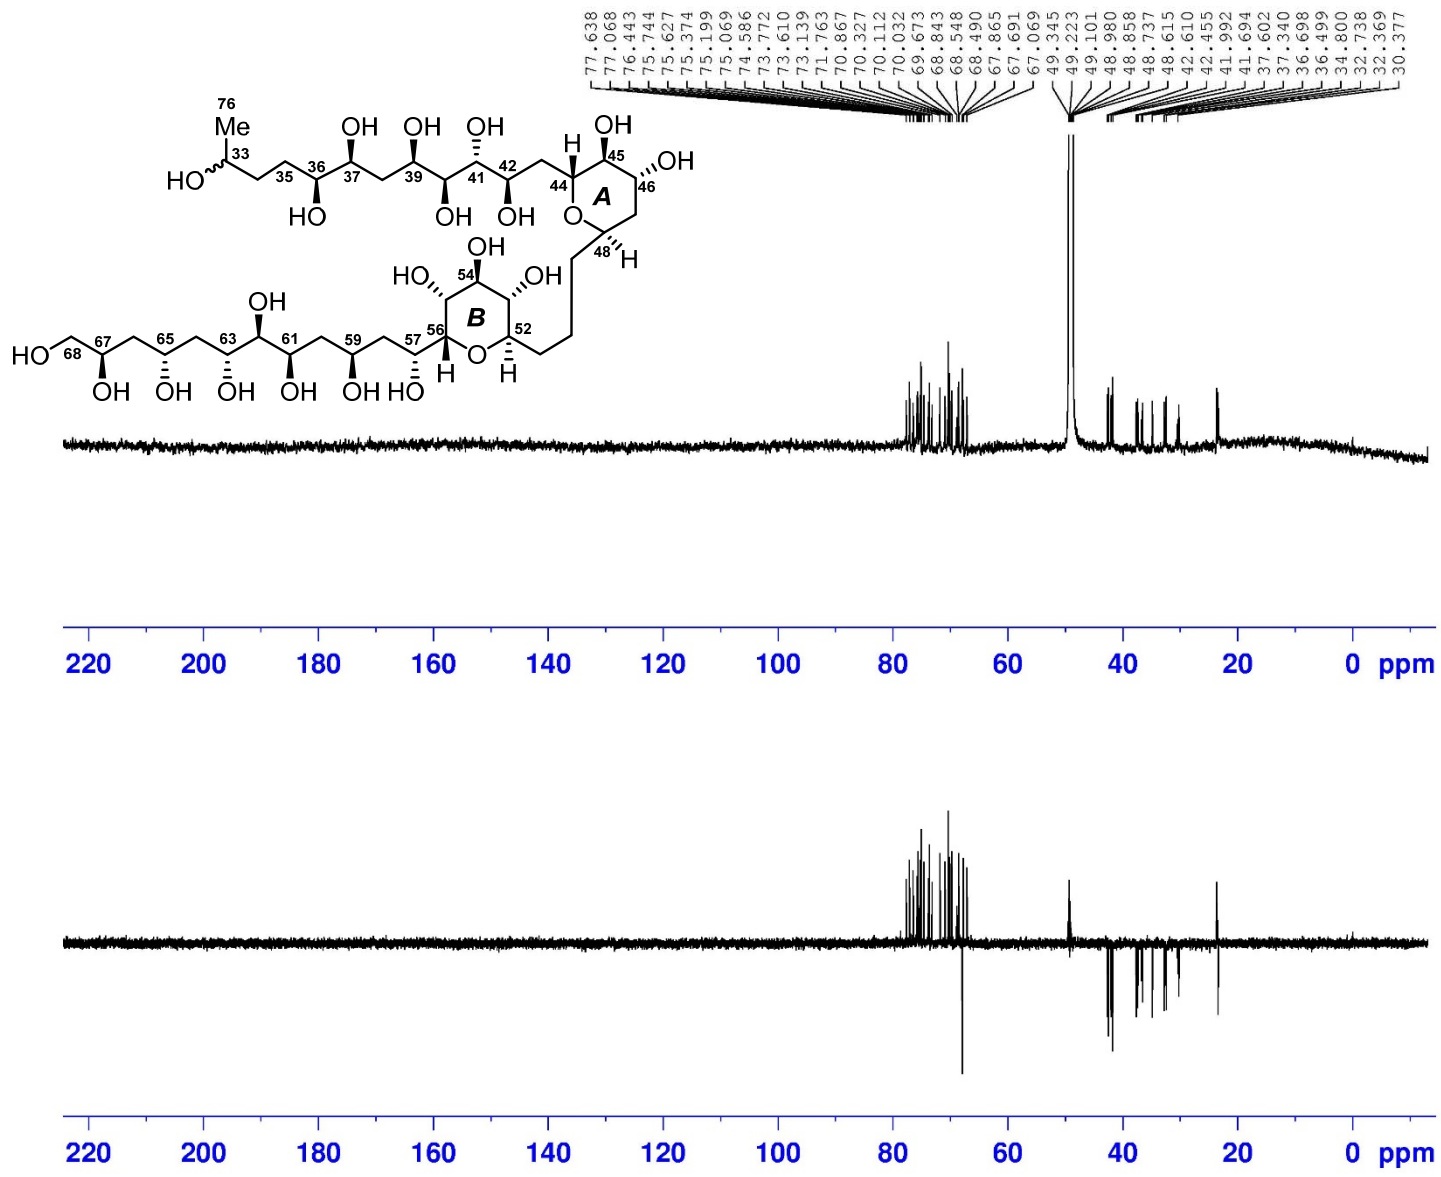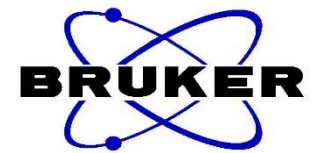

```

NAME      liwanshan-40-2-2-03-3
EXPNO     14
PROCNO    1
Date_     20200321
Time      20.33 h
INSTRUM   spect
PROBHD    Z120187_0028 (
PULPROG   depts135
TD        32768
SOLVENT   MeOD
NS        4000
DS        8
SWH        43859.648 Hz
FIDRES    2.676980 Hz
AQ         0.3736052 sec
RG         181.26
DW         11.400 usec
DE         18.00 usec
TE         298.0 K
CNST2     145.0000000
D1         1.00000000 sec
D2         0.00344828 sec
D12        0.00002000 sec
TD0        1
SFO1      176.0797677 MHz
NUC1       13C
P1         11.90 usec
P13        2000.00 usec
SI         32768
SF         176.0601605 MHz
WDW        EM
SSB        0
LB         1.00 Hz
GB         0
PC         1.40
    
```



# DEPT135 (175 MHz) spectrum of the fragment **1c** in CD<sub>3</sub>OD

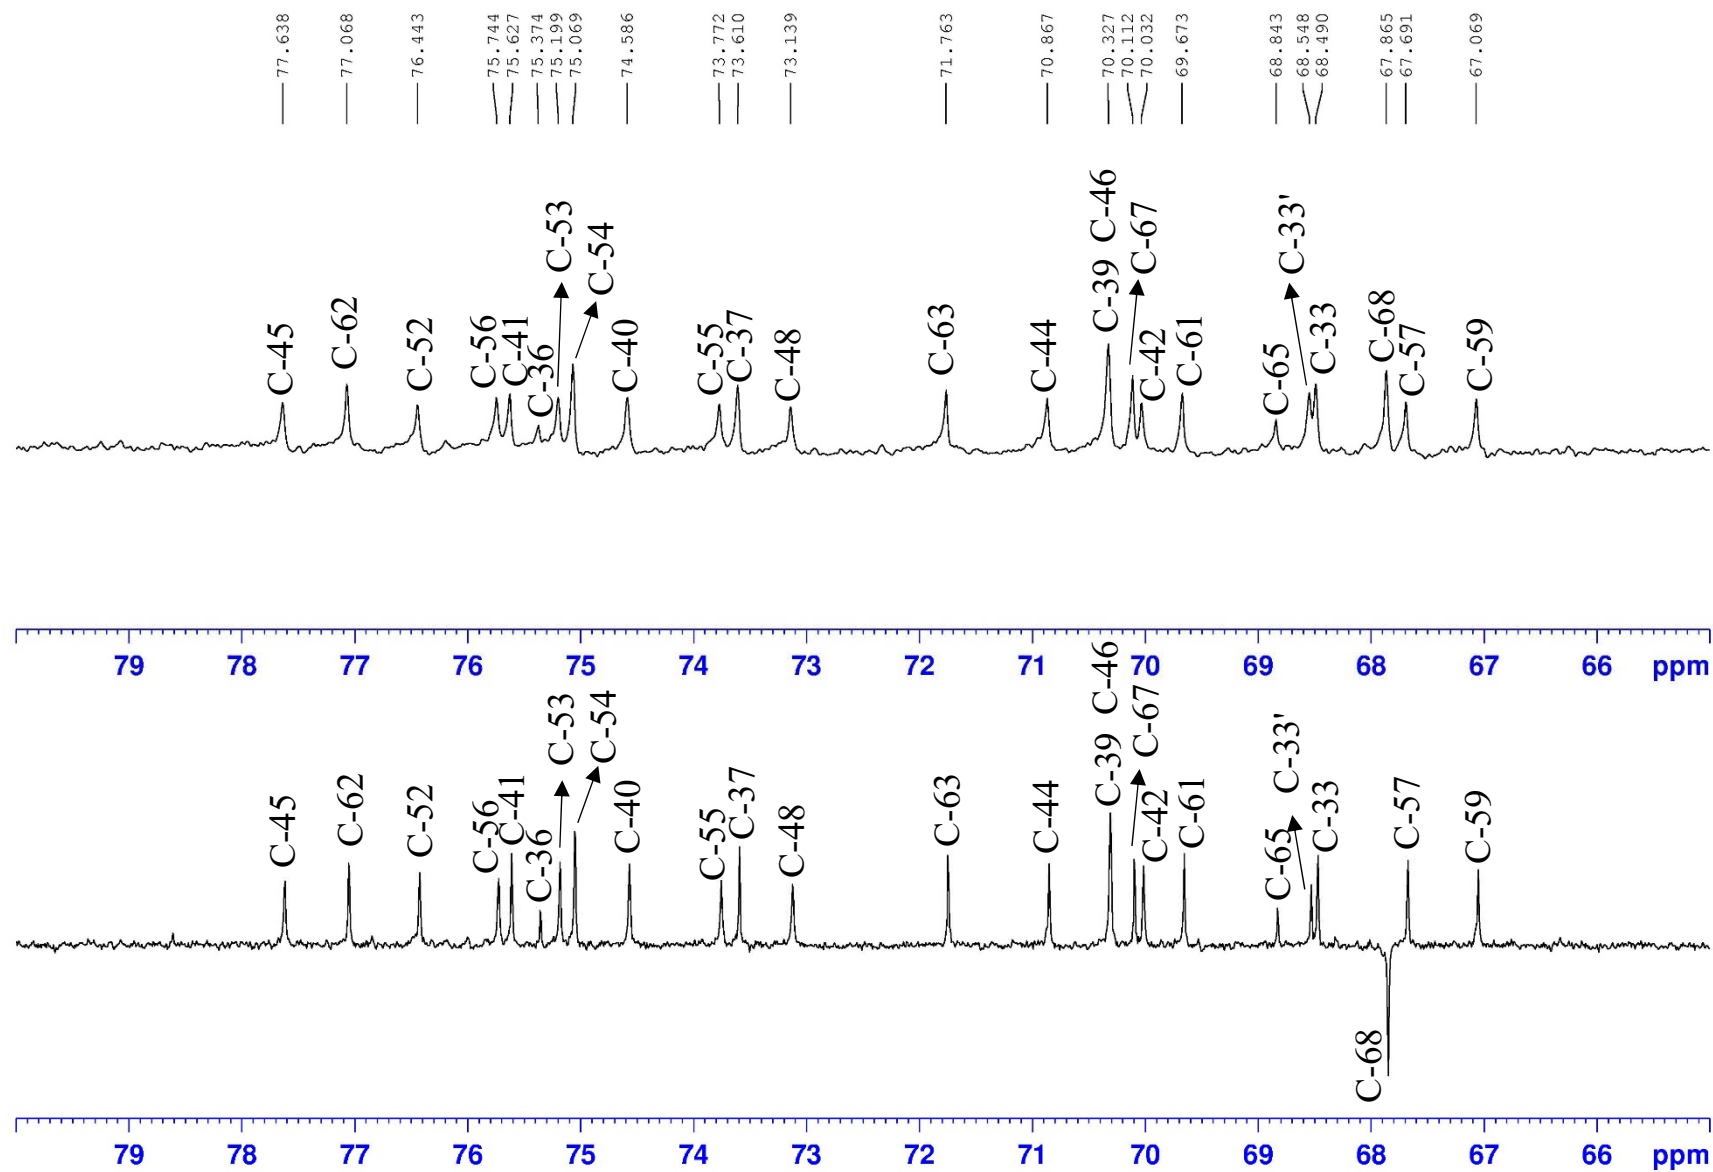

# DEPT135 (175 MHz) spectrum of the fragment **1c** in CD<sub>3</sub>OD

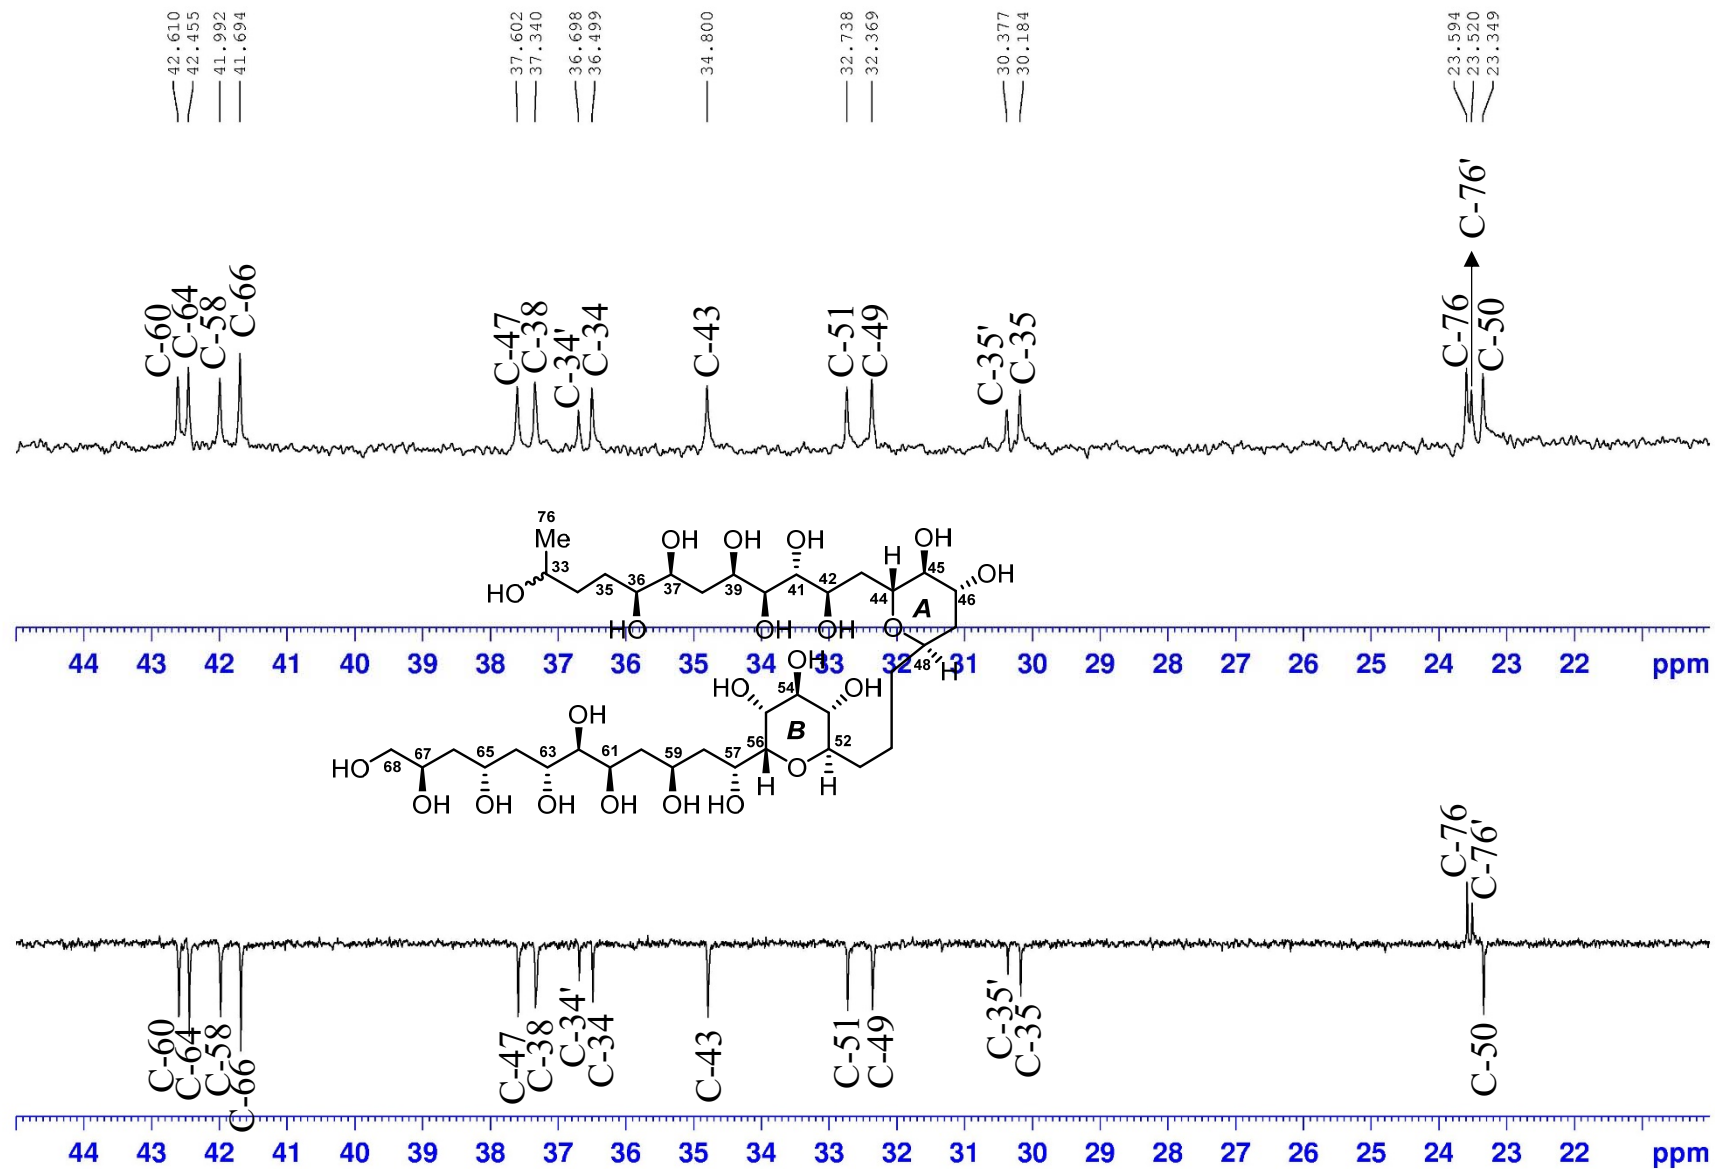

# $^1\text{H}$ - $^1\text{H}$ COSY (700 MHz) spectrum of the fragment **1c** in $\text{CD}_3\text{OD}$

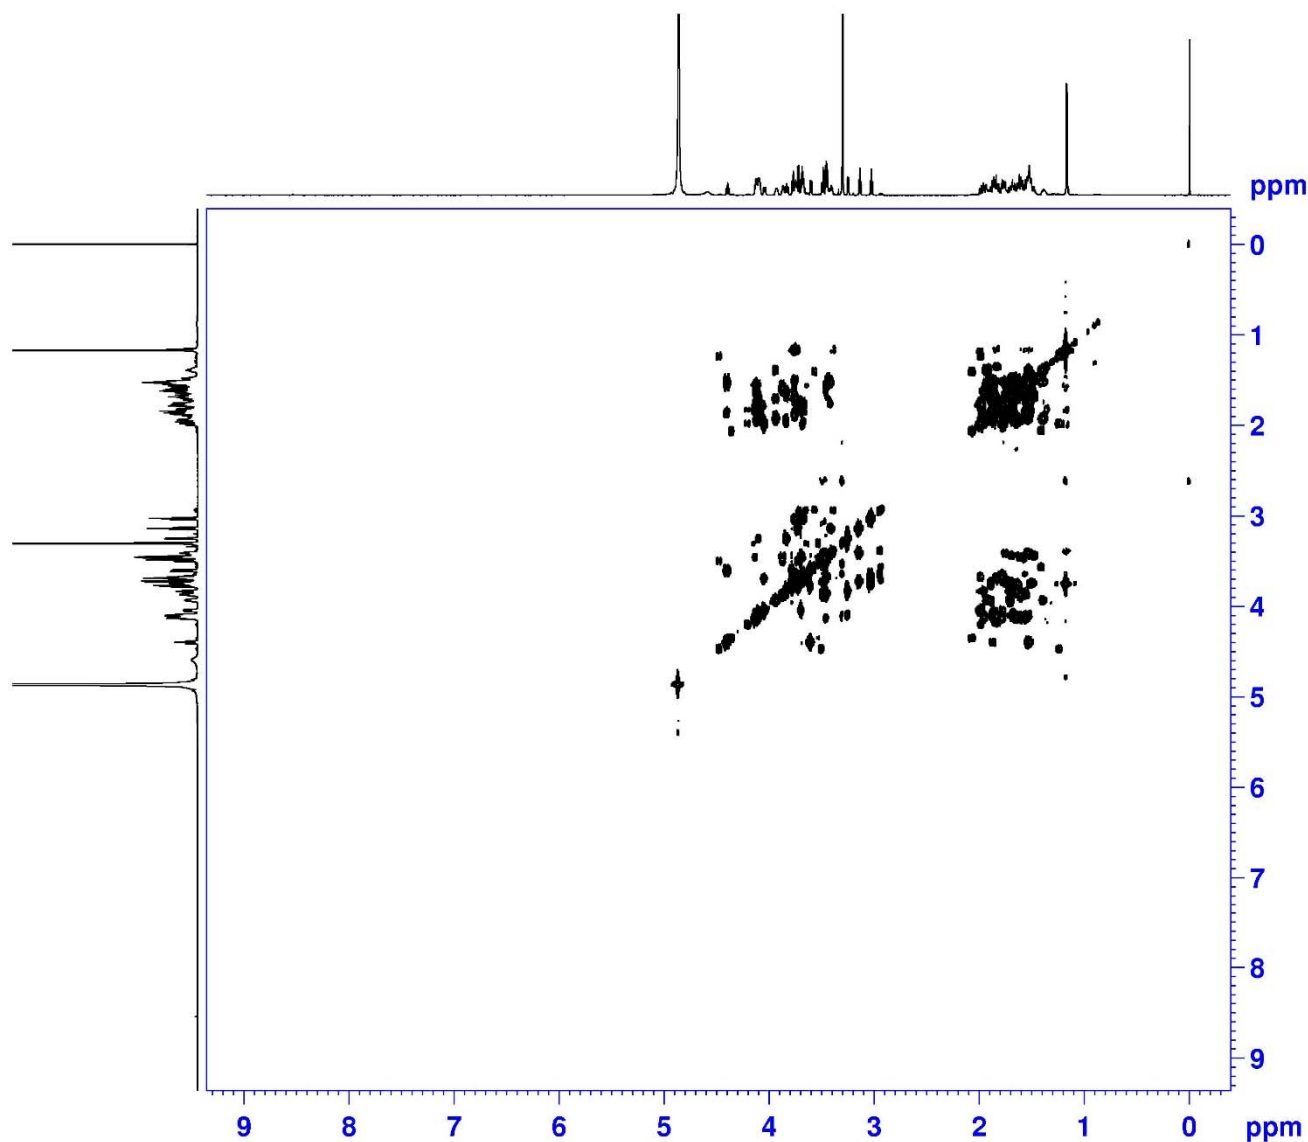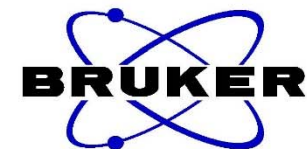

```
NAME      liwanshan-40-2-2-03-3
EXPNO     15
PROCNO    1
Date_     20200321
Time      20.35 h
INSTRUM   spect
PROBHD    z120187_0028 (
PULPROG   cosygpmfzf
TD         2048
SOLVENT   MeOD
NS         32
DS         16
SWH        4347.826 Hz
FIDRES     4.245924 Hz
AQ         0.2355700 sec
RG         181.26
DW         115.000 usec
DE         10.00 usec
TE         298.0 K
D0         0.00000300 sec
D1         1.00000000 sec
D13        0.00000400 sec
D16        0.00020000 sec
IN0        0.00023000 sec
ND0        1
TD         128
SFO1      700.1819 MHz
FIDRES     33.967392 Hz
SW         6.210 ppm
FnMODE     QF
SI         1024
SF         700.1800209 MHz
WDW        SINE
SSB        0
LB         0.00 Hz
GB         0
PC         1.40
ST         1024
MC2        QF
SF         700.1800209 MHz
WDW        SINE
SSB        0
LB         0.00 Hz
GB         0
```

$^1\text{H}$ - $^1\text{H}$  COSY (700 MHz) spectrum of the fragment **1c** in  $\text{CD}_3\text{OD}$

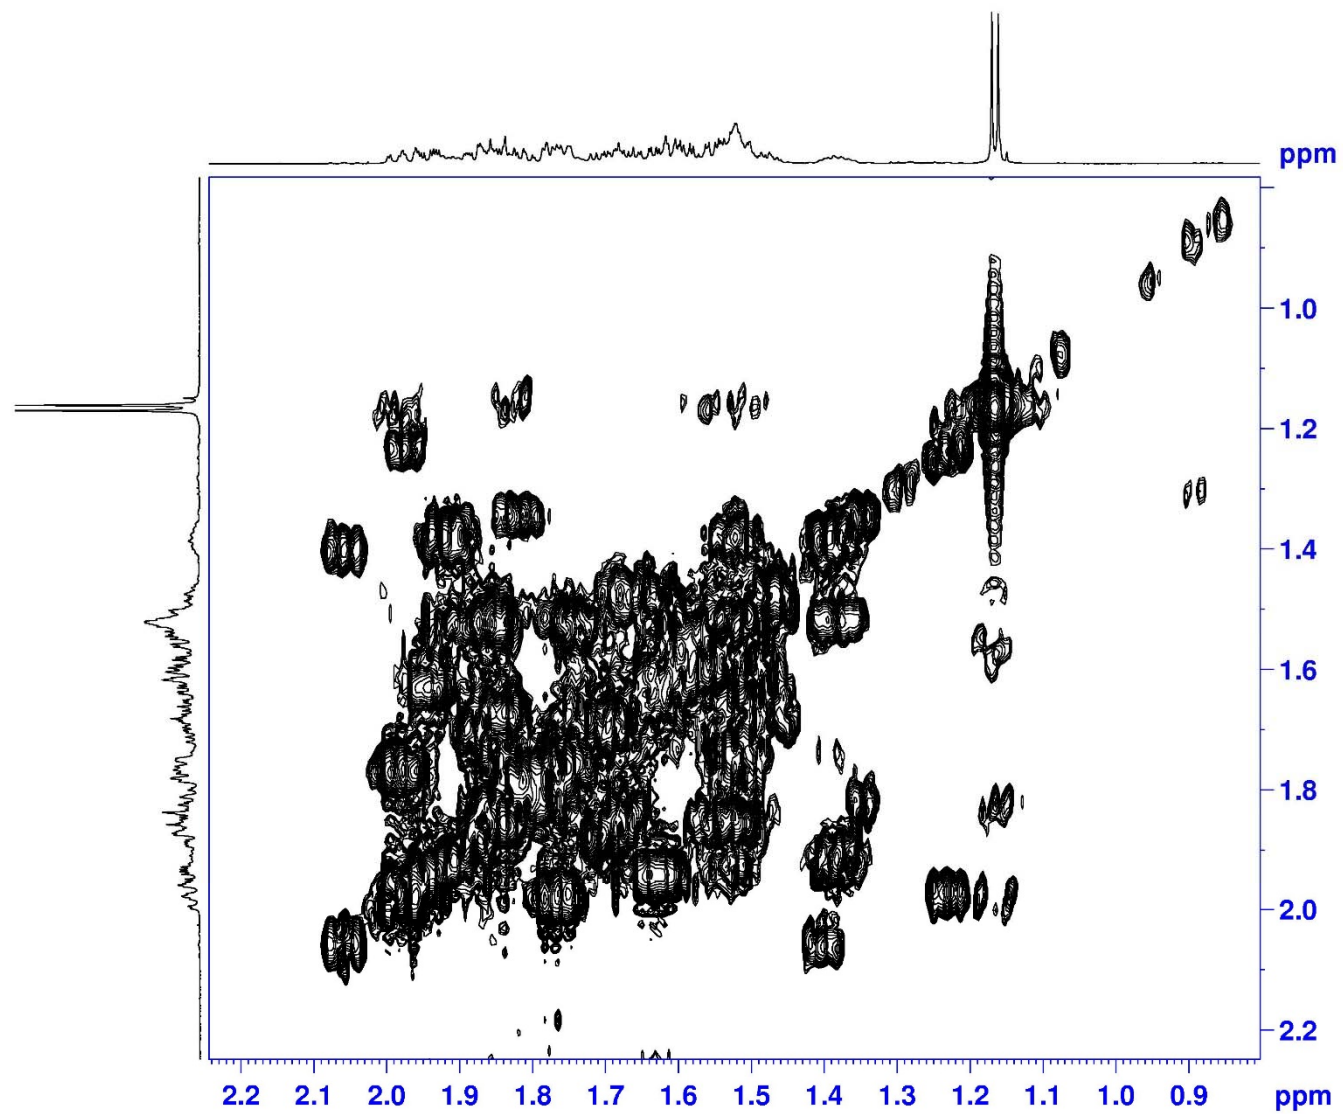

$^1\text{H}$ - $^1\text{H}$  COSY (700 MHz) spectrum of the fragment **1c** in  $\text{CD}_3\text{OD}$

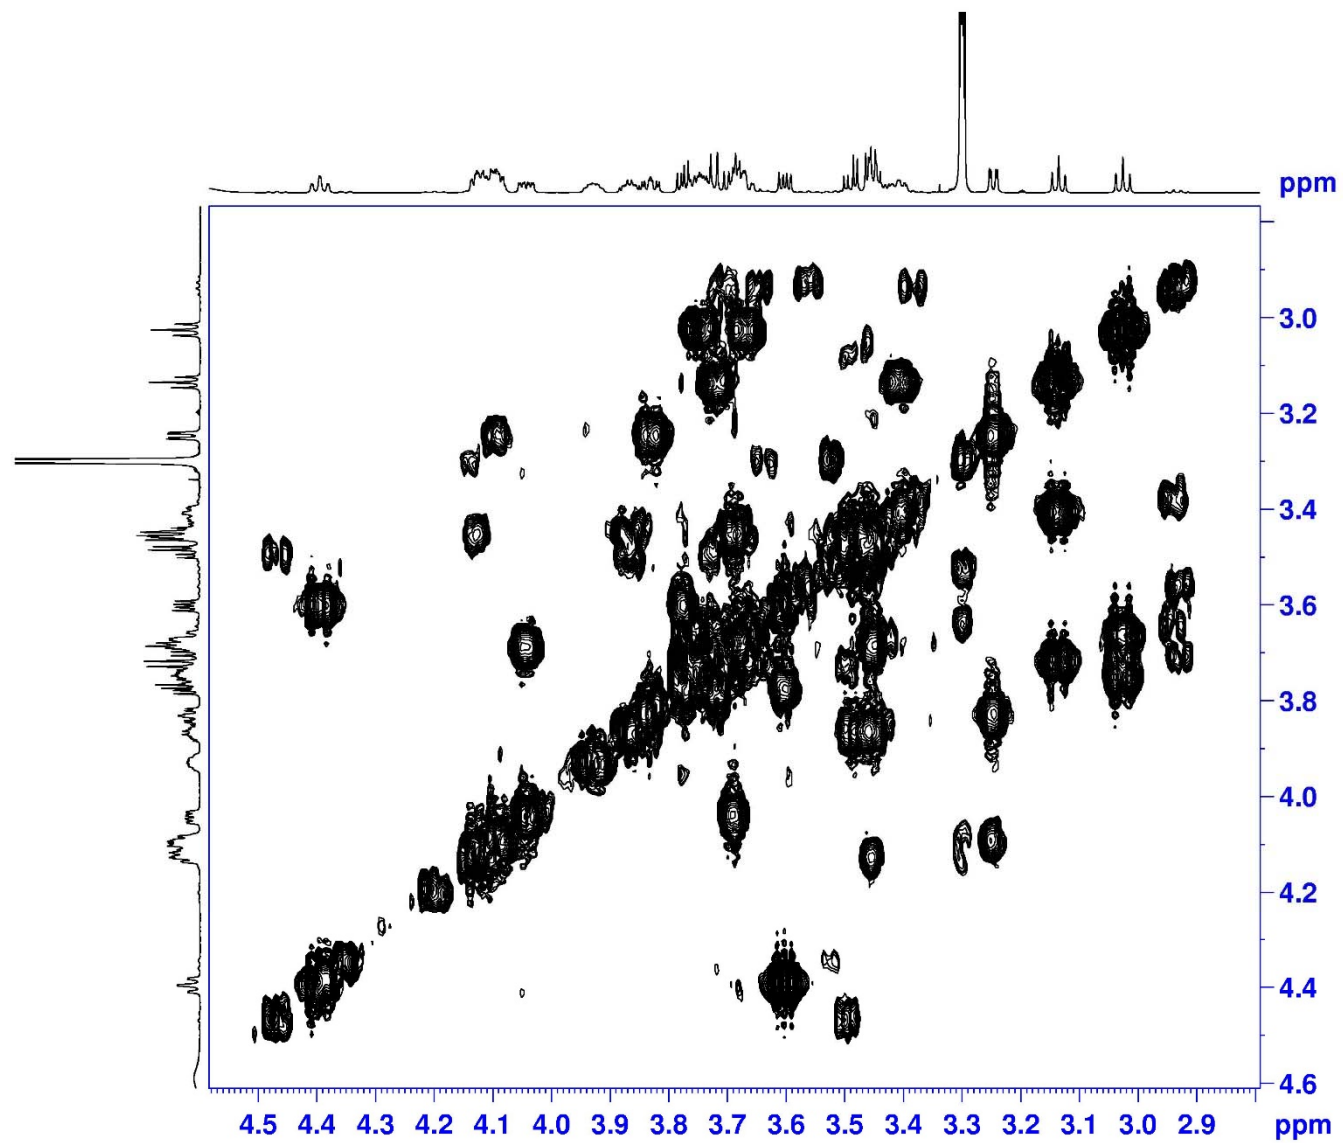

$^1\text{H}$ - $^1\text{H}$  COSY (700 MHz) spectrum of the fragment **1c** in  $\text{CD}_3\text{OD}$

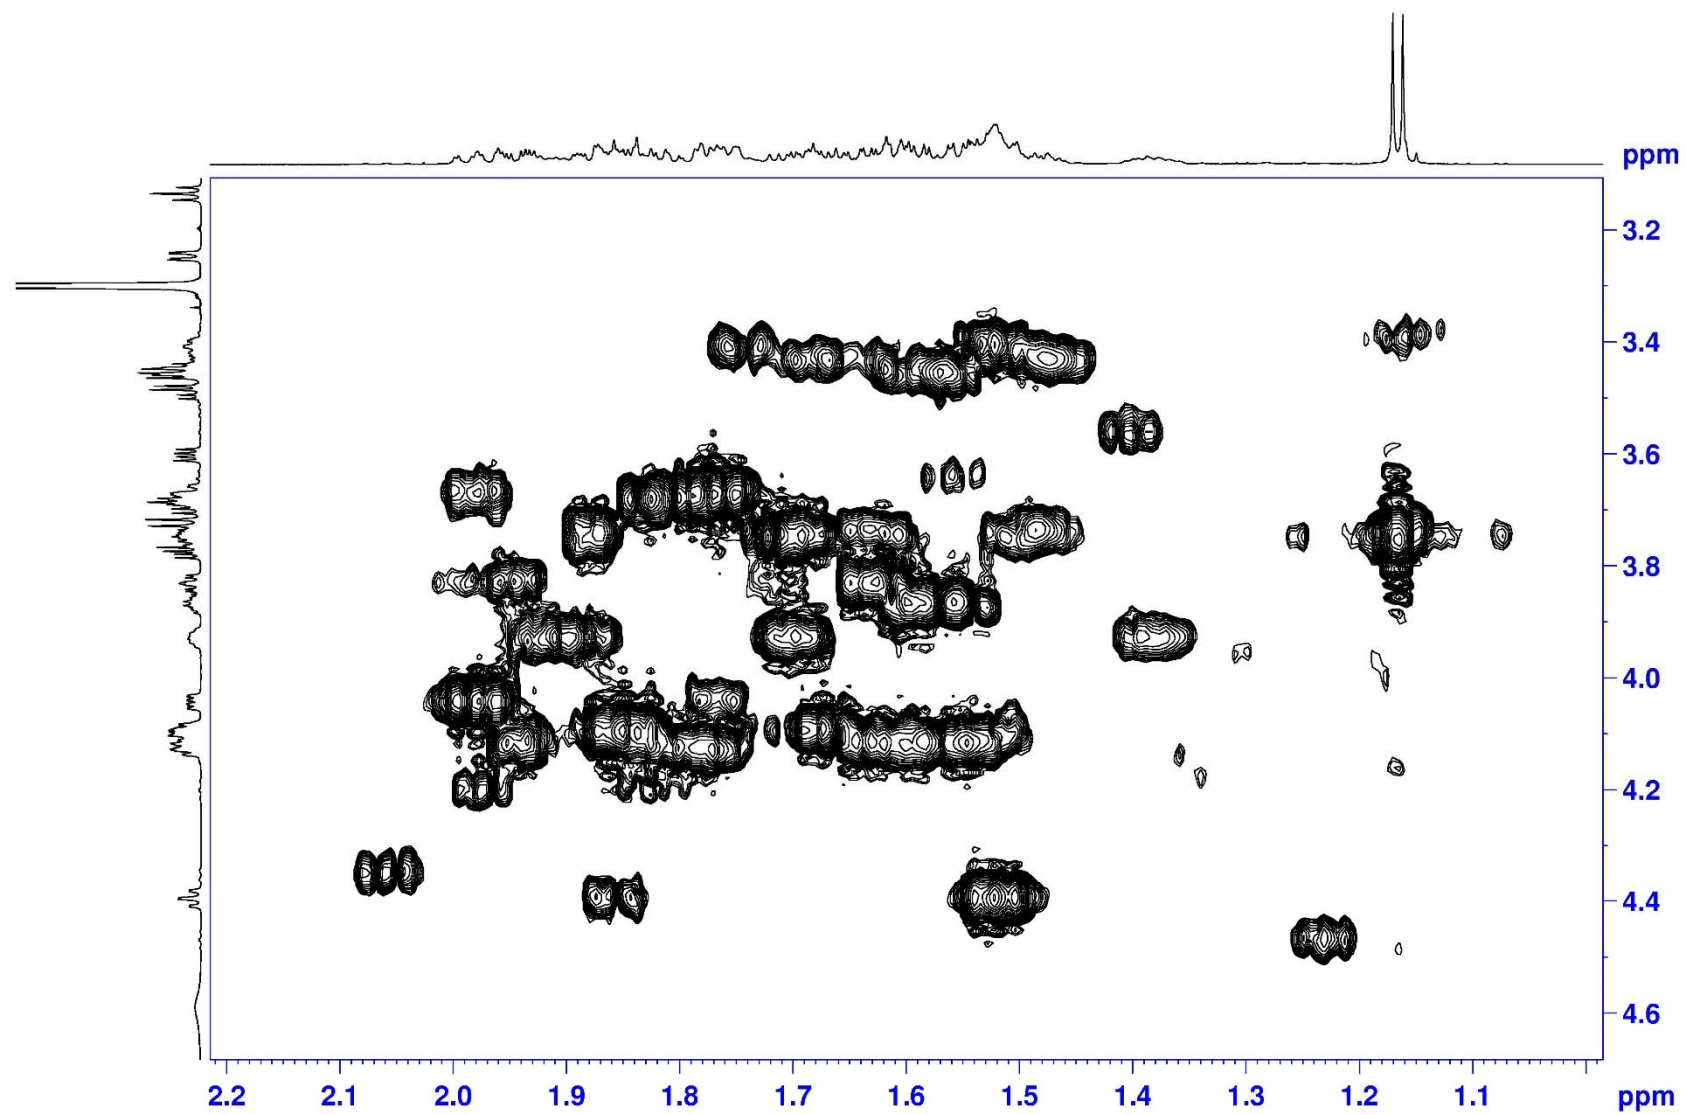

# HSQC (700 MHz) spectrum of the fragment **1c** in CD<sub>3</sub>OD

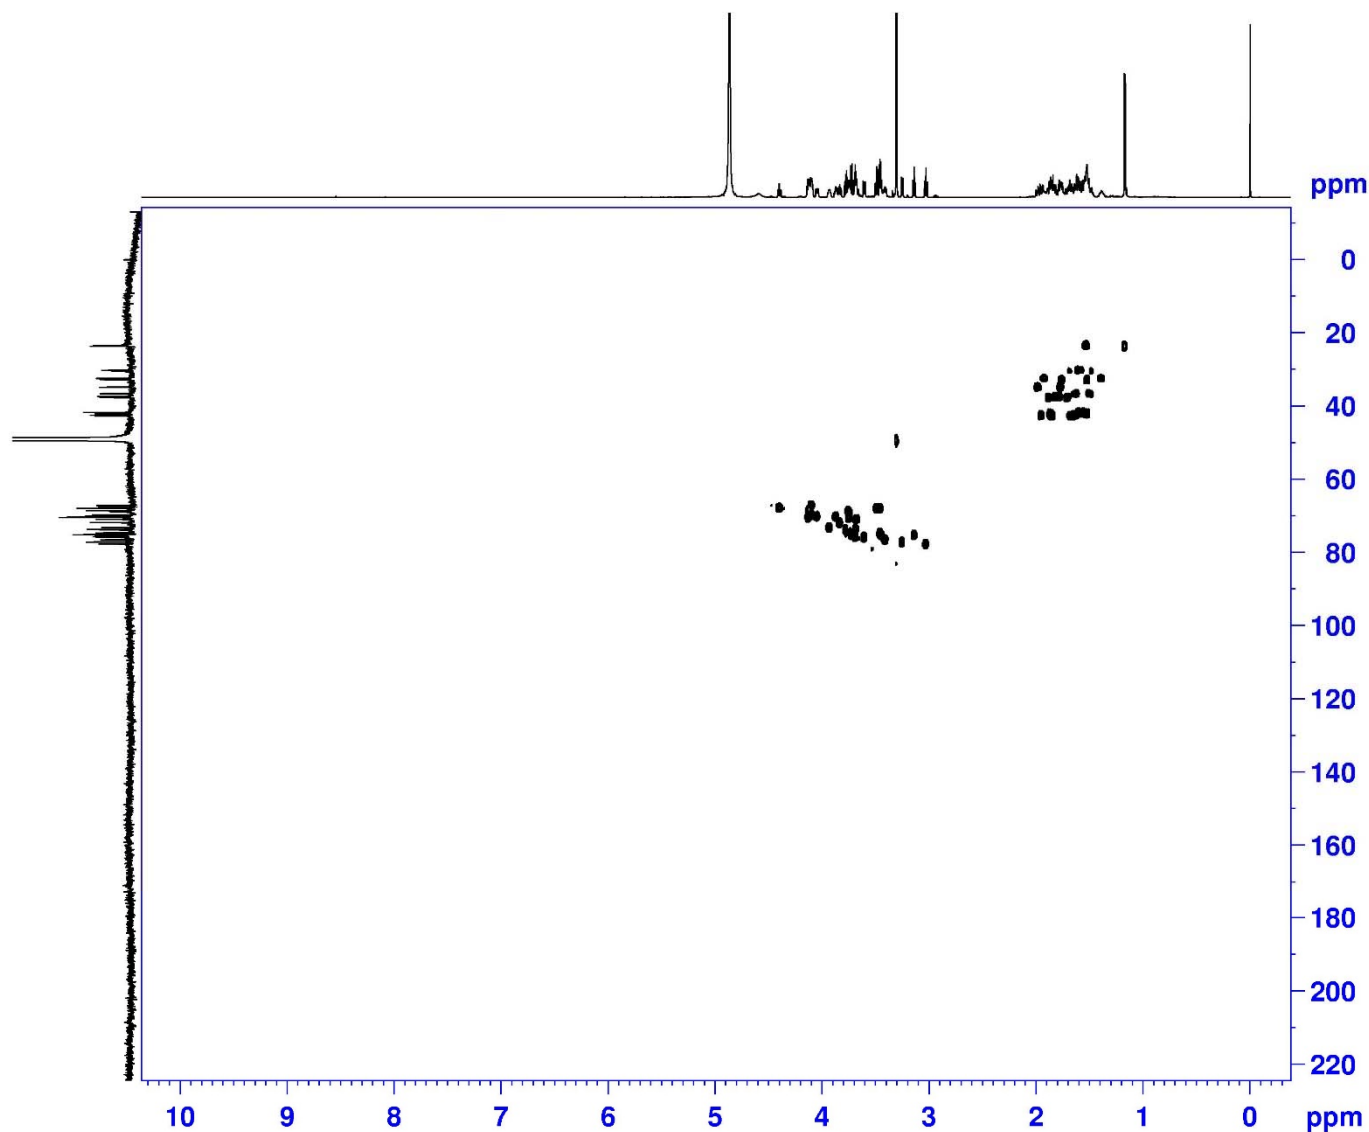

|         |                   |
|---------|-------------------|
| NAME    | liwanshan-40-2-2- |
| EXPNO   | 16                |
| PROCNO  | 1                 |
| Date_   | 20200321          |
| Time    | 22.03 h           |
| INSTRUM | spect             |
| PROBHD  | Z120187_0028 (    |
| PULPROG | hsqcetgp          |
| TD      | 2048              |
| SOLVENT | MeOD              |
| NS      | 48                |
| DS      | 16                |
| SWH     | 5122.951 Hz       |
| FIDRES  | 5.002882 Hz       |
| AQ      | 0.1999348 se      |
| RG      | 181.26            |
| DW      | 97.600 us         |
| DE      | 10.00 us          |
| TE      | 298.0 K           |
| CNST2   | 145.0000000       |
| D0      | 0.00000300 se     |
| D1      | 1.50000000 se     |
| D4      | 0.00172414 se     |
| D11     | 0.03000000 se     |
| D16     | 0.00020000 se     |
| IN0     | 0.00001630 se     |
| ND0     | 2                 |
| TD      | 128               |
| SFO1    | 176.0746 MH       |
| FIDRES  | 239.647232 Hz     |
| SW      | 174.215 pp        |
| FnMODE  | Echo-Antiecho     |
| SI      | 2048              |
| SF      | 700.1800209 MH    |
| WDW     | QSINE             |
| SSB     | 2                 |
| LB      | 0.00 Hz           |
| GB      | 0                 |
| PC      | 1.40              |
| SI      | 2048              |
| MC2     | echo-antiecho     |
| SF      | 176.0601577 MH    |
| WDW     | QSINE             |
| SSB     | 2                 |
| LB      | 0.00 Hz           |
| GB      | 0                 |

HSQC (700 MHz) spectrum of the fragment **1c** in CD<sub>3</sub>OD

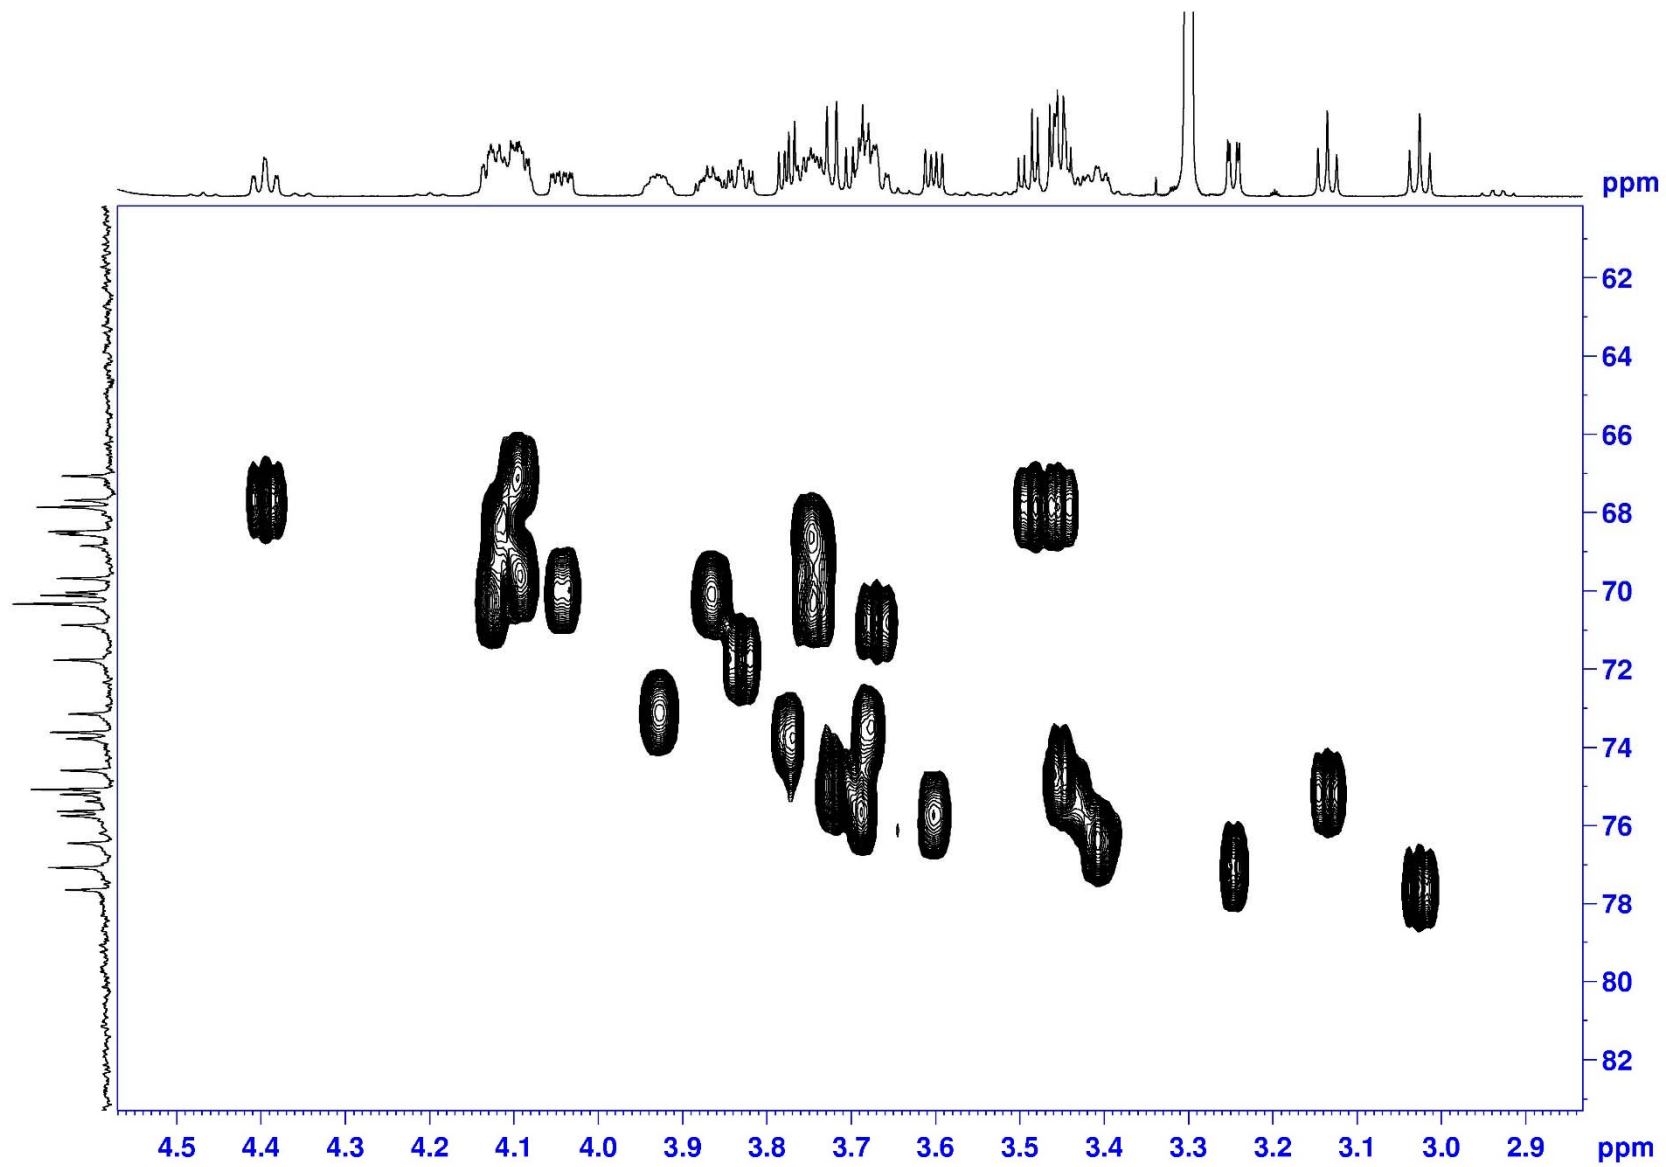



HSQC (700 MHz) spectrum of the fragment **1c** in CD<sub>3</sub>OD

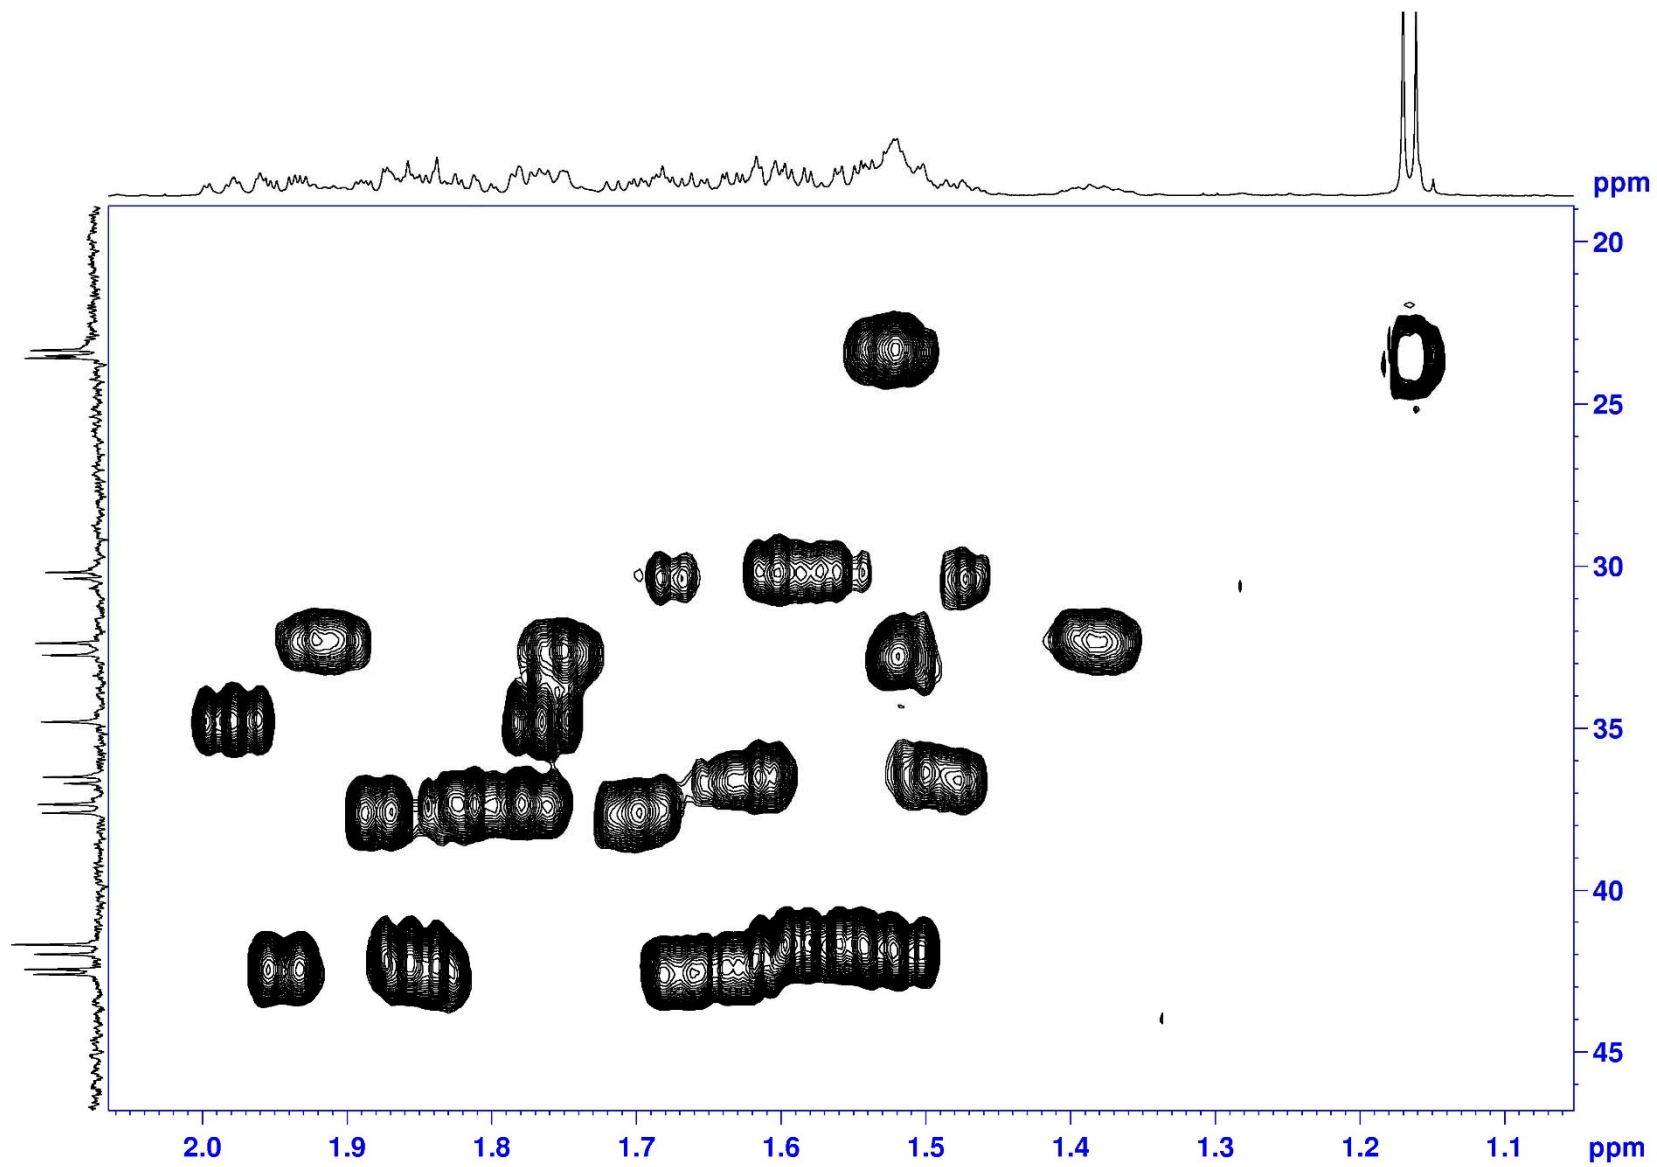

# HMBC (700 MHz) spectrum of the fragment **1c** in CD<sub>3</sub>OD

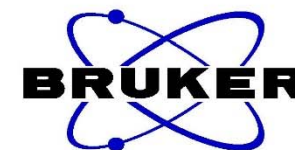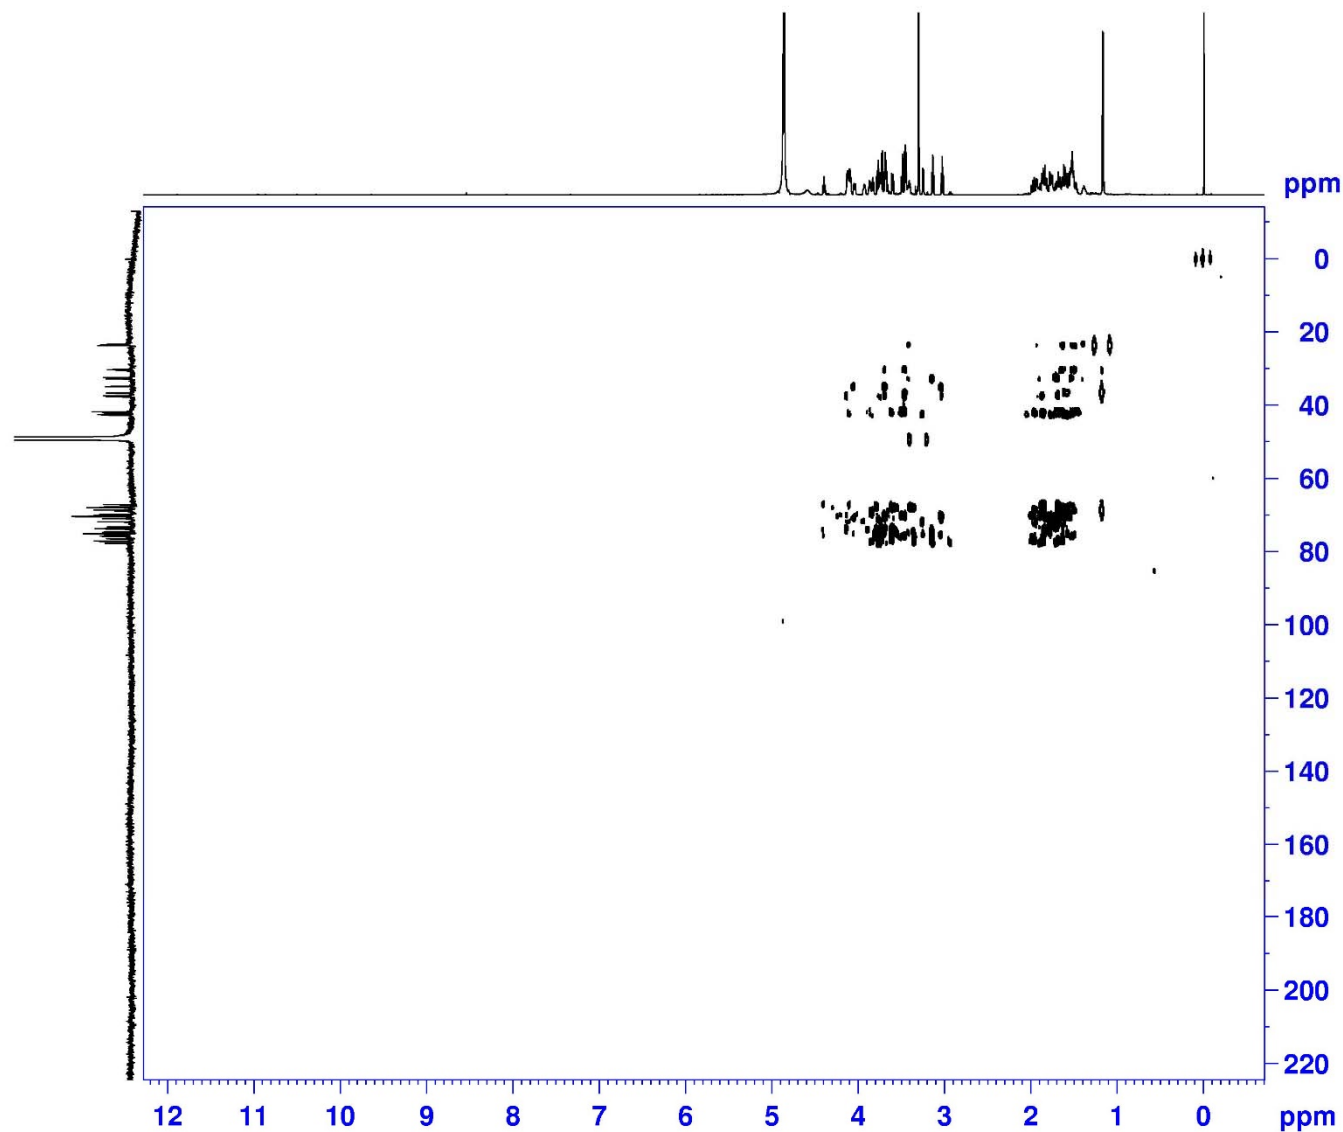

|         |                       |
|---------|-----------------------|
| NAME    | liwanshan-40-2-2-03-3 |
| EXPNO   | 17                    |
| PROCNO  | 1                     |
| Date_   | 20200322              |
| Time    | 1.00 h                |
| INSTRUM | spect                 |
| PROBHD  | Z120187_0028 (        |
| PULPROG | hmbcgpndqf            |
| TD      | 4096                  |
| SOLVENT | MeOD                  |
| NS      | 56                    |
| DS      | 16                    |
| SWH     | 4288.165 Hz           |
| FIDRES  | 2.093830 Hz           |
| AQ      | 0.4776436 sec         |
| RG      | 181.26                |
| DW      | 116.600 usec          |
| DE      | 10.00 usec            |
| TE      | 298.0 K               |
| CNST13  | 8.0000000             |
| DO      | 0.00000300 sec        |
| D1      | 1.00000000 sec        |
| D6      | 0.06250000 sec        |
| D16     | 0.00020000 sec        |
| IN0     | 0.00001720 sec        |
| ND0     | 2                     |
| TD      | 128                   |
| SFO1    | 176.0741 MHz          |
| FIDRES  | 227.107559 Hz         |
| SW      | 165.100 ppm           |
| FnMODE  | QF                    |
| SI      | 4096                  |
| SF      | 700.1800230 MHz       |
| WDW     | SINE                  |
| SSB     | 0                     |
| LB      | 0.00 Hz               |
| GB      | 0                     |
| PC      | 1.40                  |
| SI      | 2048                  |
| MC2     | QF                    |
| SF      | 176.0601577 MHz       |
| WDW     | SINE                  |
| SSB     | 0                     |
| LB      | 0.00 Hz               |
| GB      | 0                     |

HMBC (700 MHz) spectrum of the fragment **1c** in CD<sub>3</sub>OD

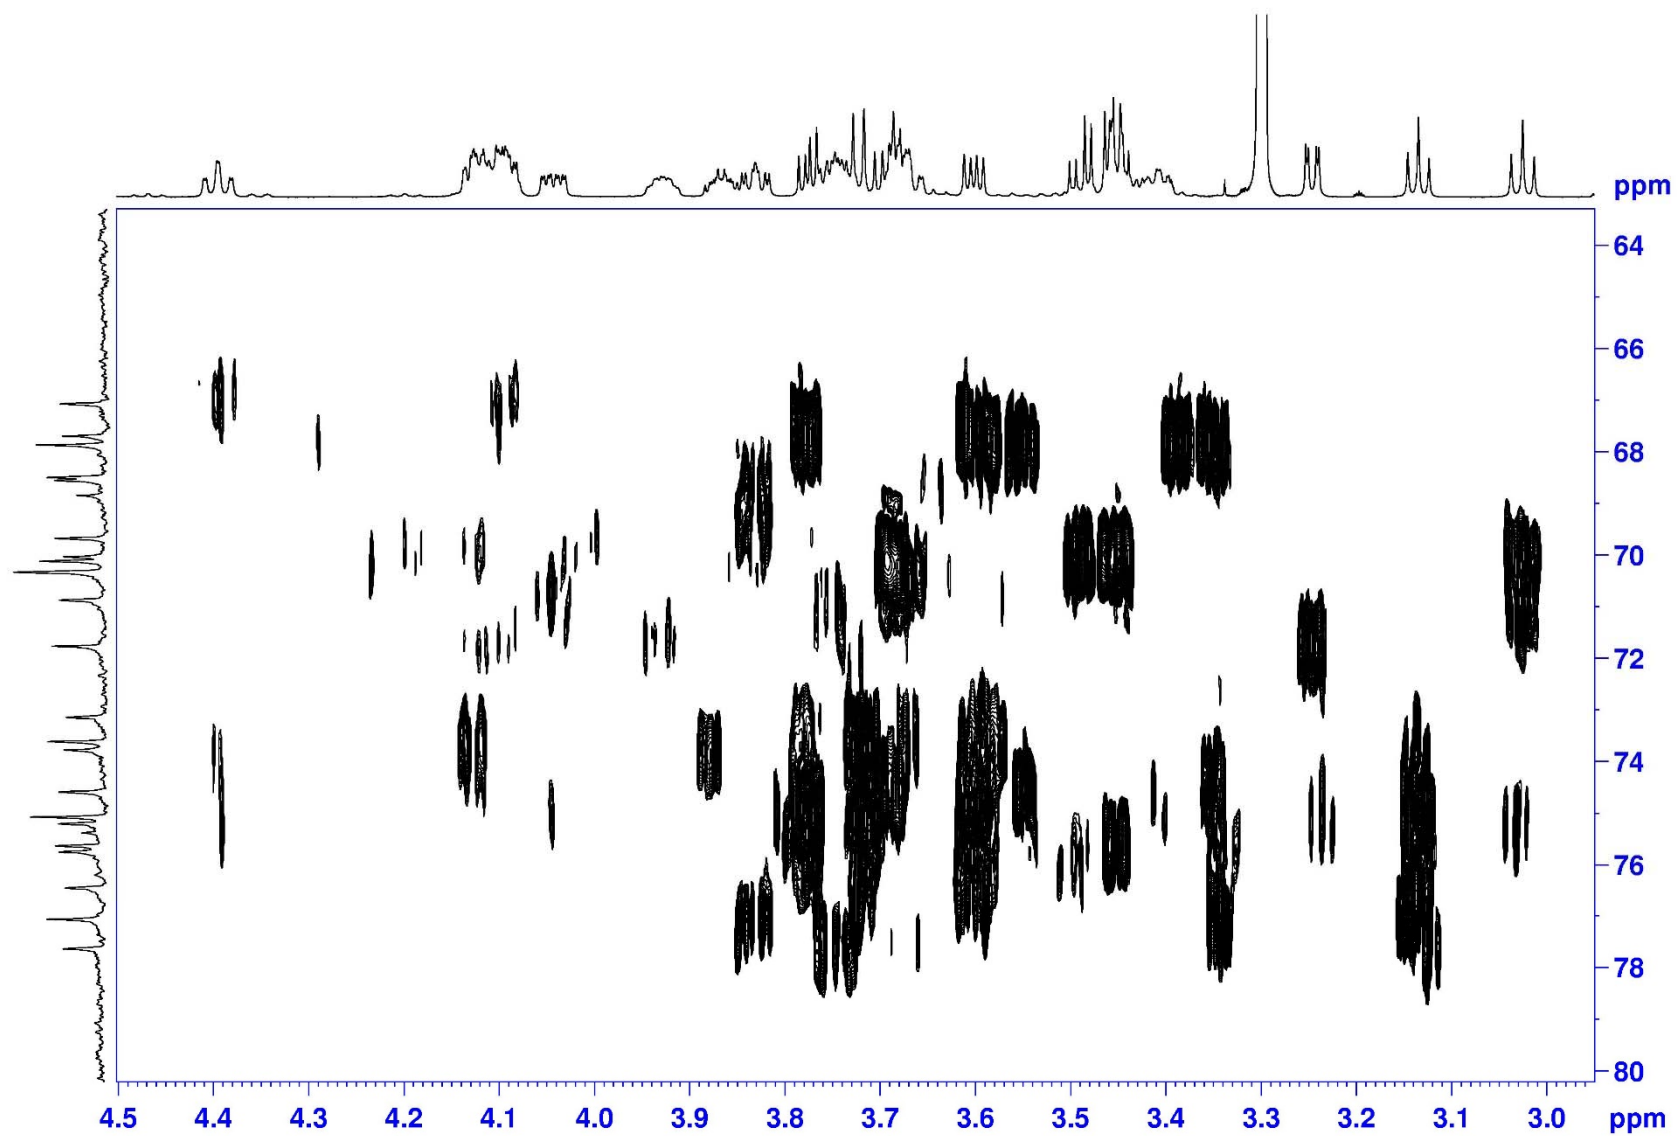

HMBC (700 MHz) spectrum of the fragment **1c** in CD<sub>3</sub>OD

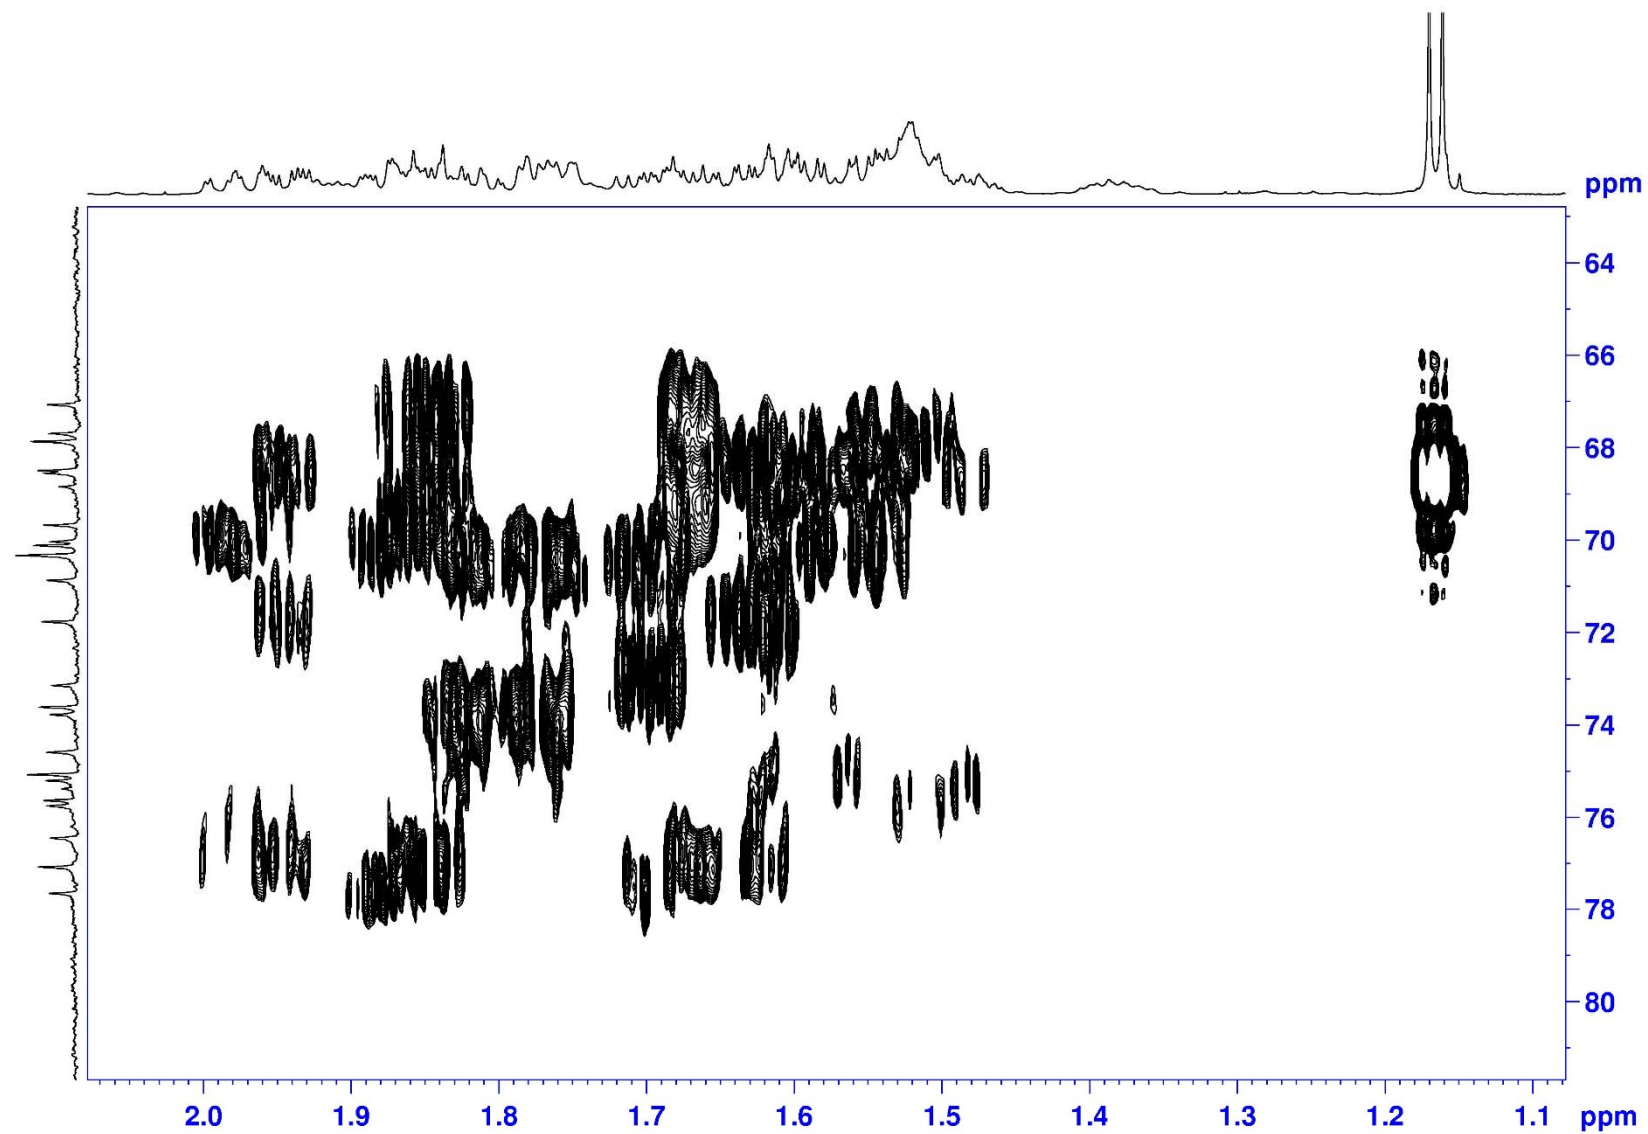

HMBC (700 MHz) spectrum of the fragment **1c** in CD<sub>3</sub>OD

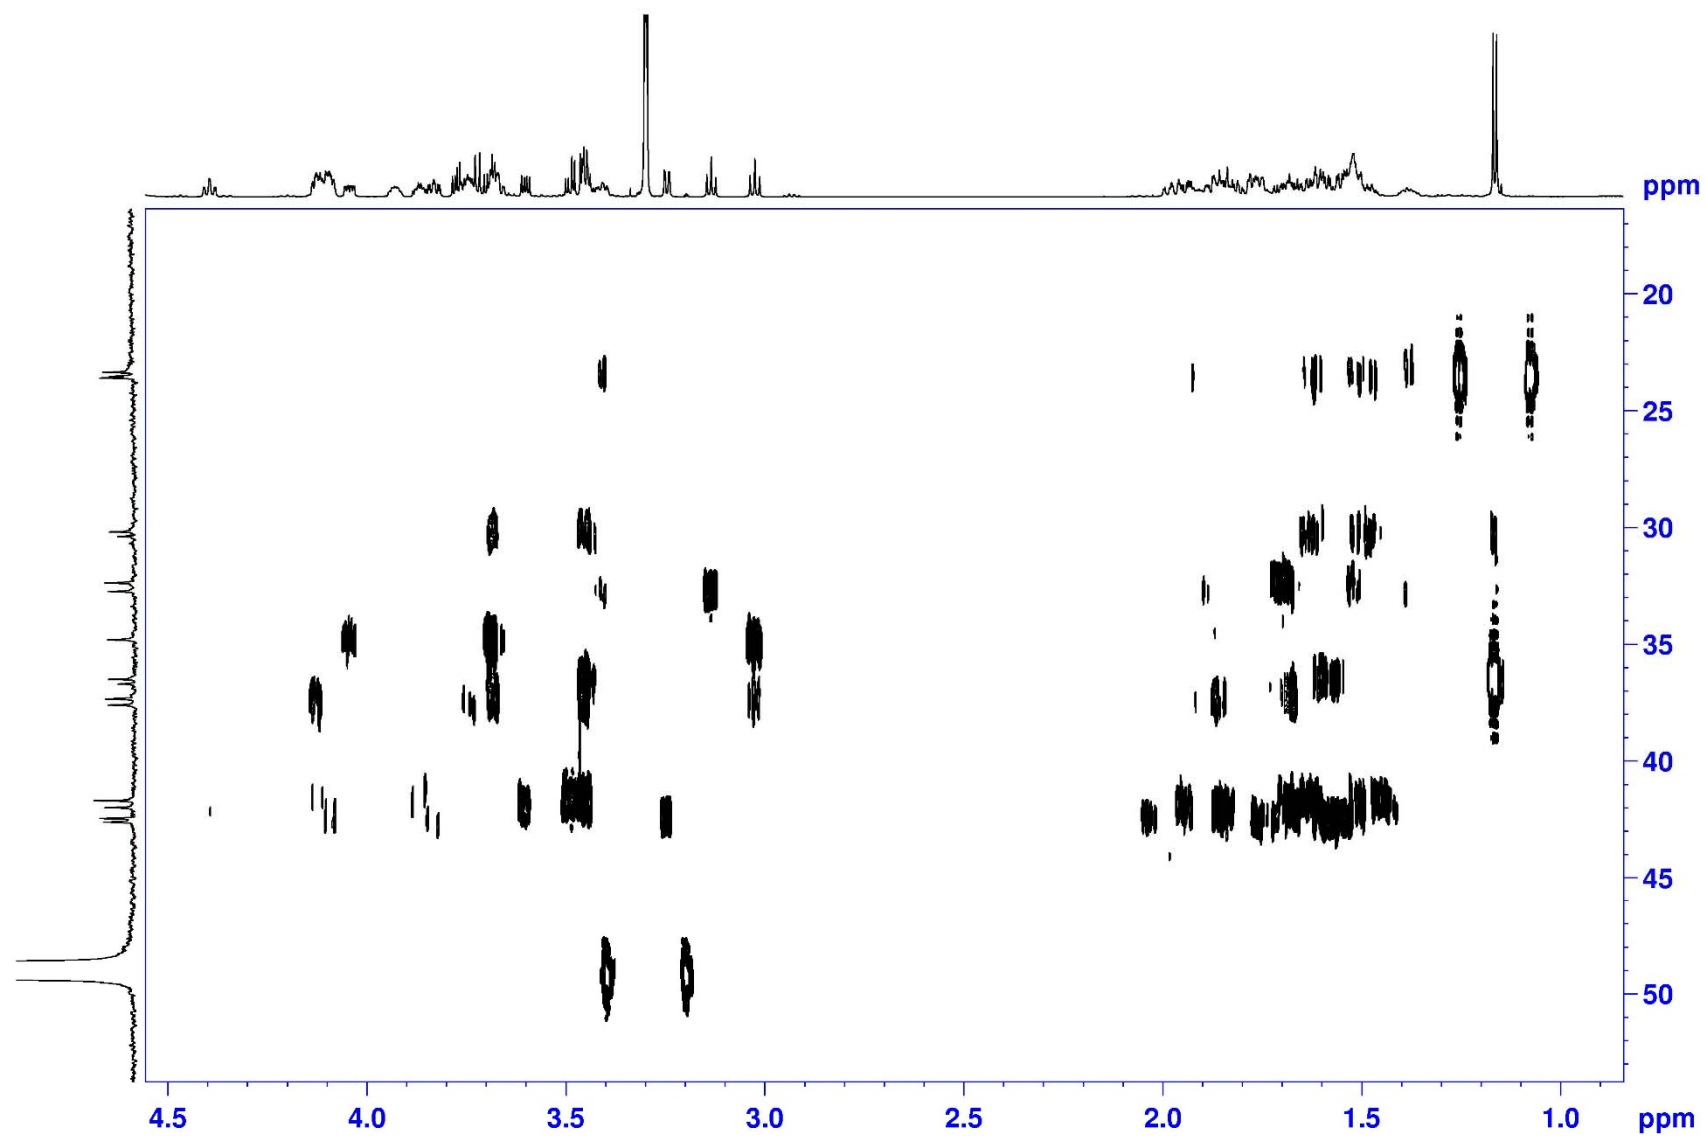

# NOESY (700 MHz) spectrum of the fragment **1c** in CD<sub>3</sub>OD

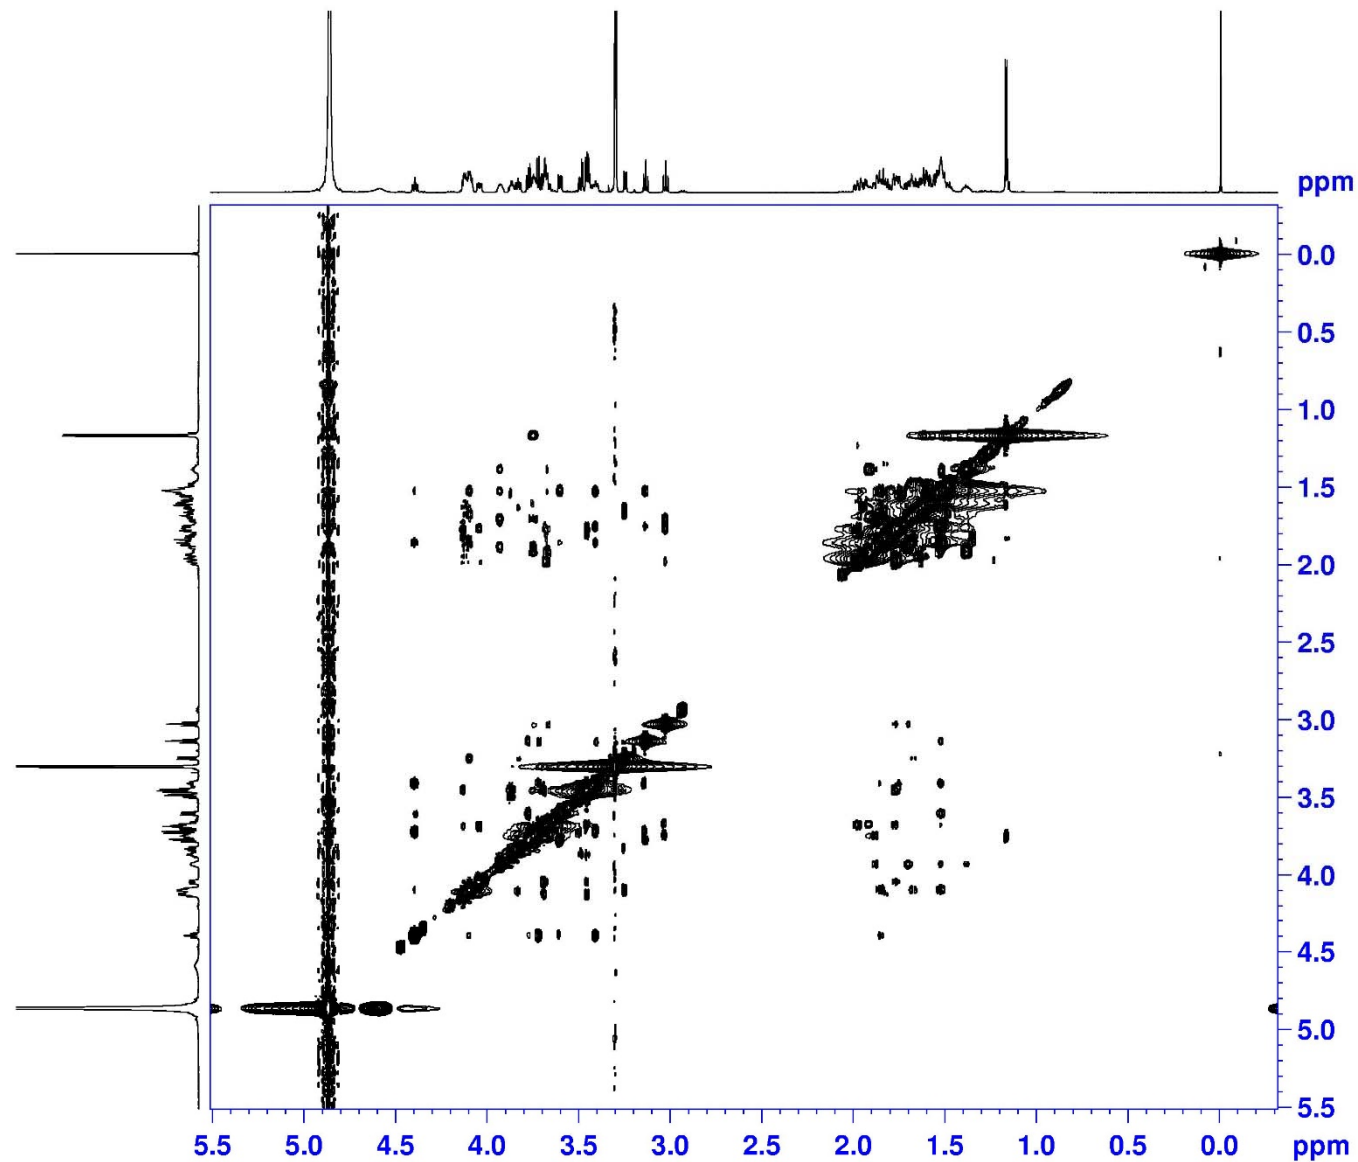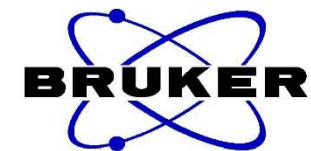

|         |                      |
|---------|----------------------|
| NAME    | liwanshan-40-2-2-03- |
| EXPNO   | 23                   |
| PROCNO  | 1                    |
| Date_   | 20200330             |
| Time    | 18.43 h              |
| INSTRUM | spect                |
| PROBHD  | z120187_0028 (       |
| PULPROG | noesygp              |
| TD      | 2048                 |
| SOLVENT | MeOD                 |
| NS      | 24                   |
| DS      | 16                   |
| SWH     | 4084.967 Hz          |
| FIDRES  | 3.989226 Hz          |
| AQ      | 0.2507252 sec        |
| RG      | 15.56                |
| DW      | 122.400 usec         |
| DE      | 10.00 usec           |
| TE      | 298.0 K              |
| D0      | 0.00011279 sec       |
| D1      | 1.50000000 sec       |
| D8      | 0.60000002 sec       |
| D16     | 0.00020000 sec       |
| IN0     | 0.00024480 sec       |
| ND0     | 1                    |
| TD      | 256                  |
| SFO1    | 700.1818 MHz         |
| FIDRES  | 15.956903 Hz         |
| SW      | 5.834 ppm            |
| EnMODE  | TPPI                 |
| SI      | 2048                 |
| SF      | 700.1800209 MHz      |
| WDW     | QSINE                |
| SSB     | 2                    |
| LB      | 0.00 Hz              |
| GB      | 0                    |
| PC      | 1.00                 |
| SI      | 2048                 |
| MC2     | TPPI                 |
| SF      | 700.1800209 MHz      |
| WDW     | QSINE                |
| SSB     | 2                    |
| LB      | 0.00 Hz              |
| GB      | 0                    |

NOESY (700 MHz) spectrum of the fragment **1c** in CD<sub>3</sub>OD

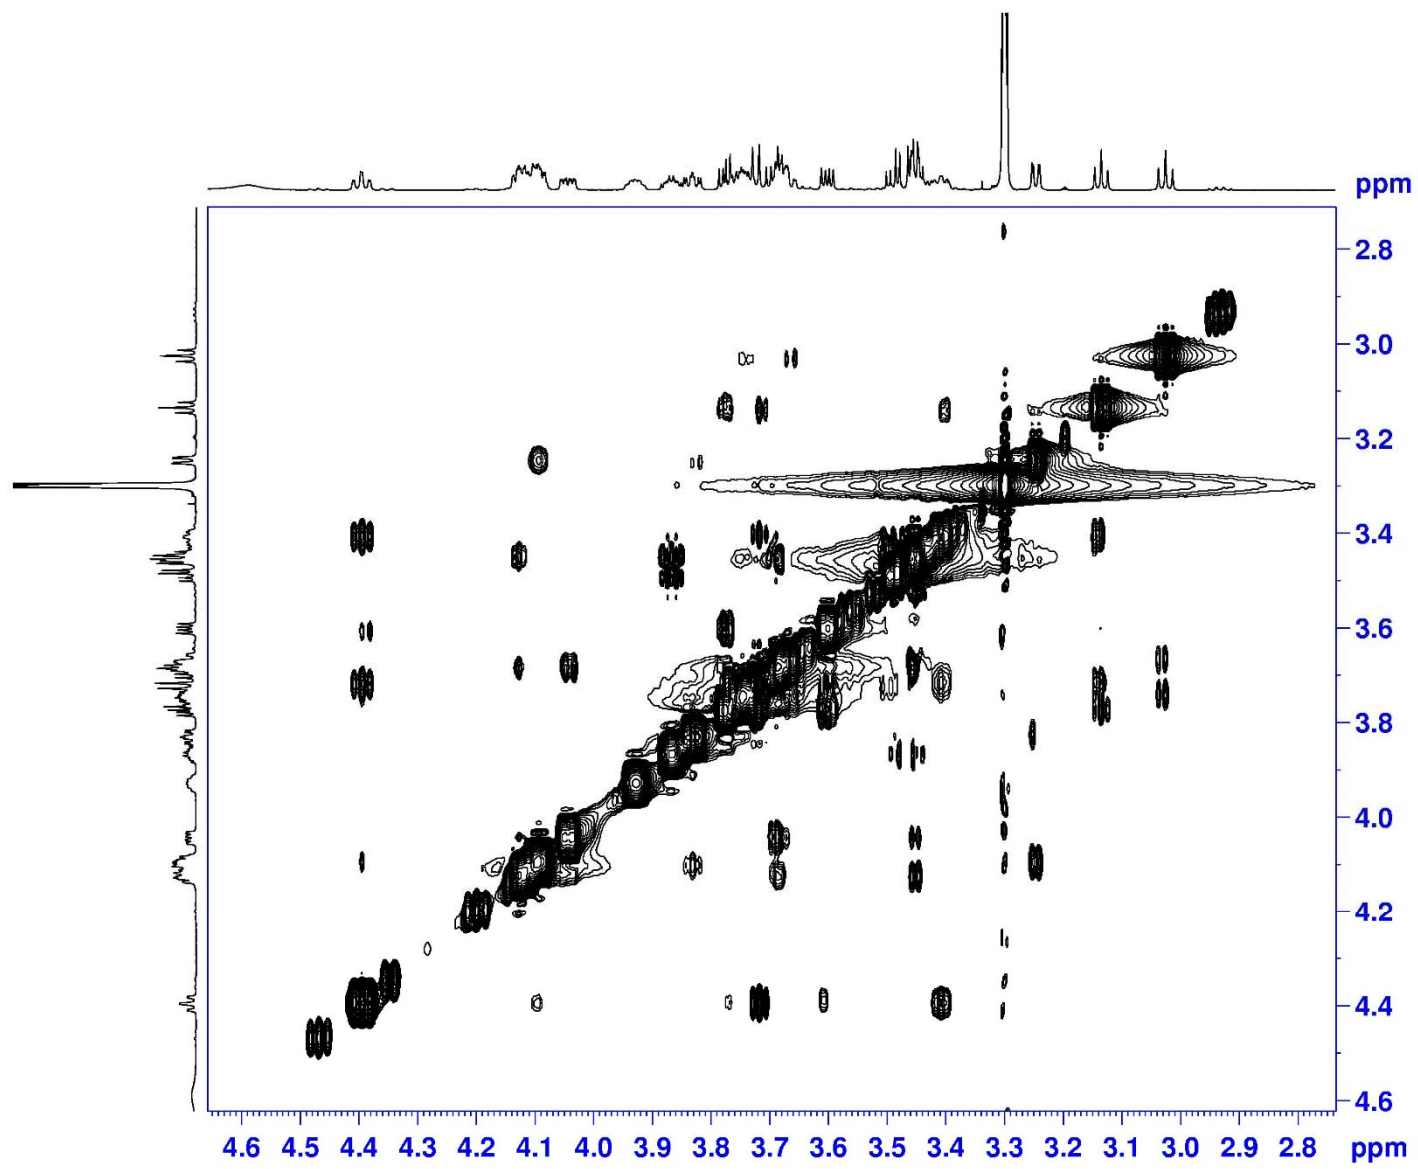

NOESY (700 MHz) spectrum of the fragment **1c** in CD<sub>3</sub>OD

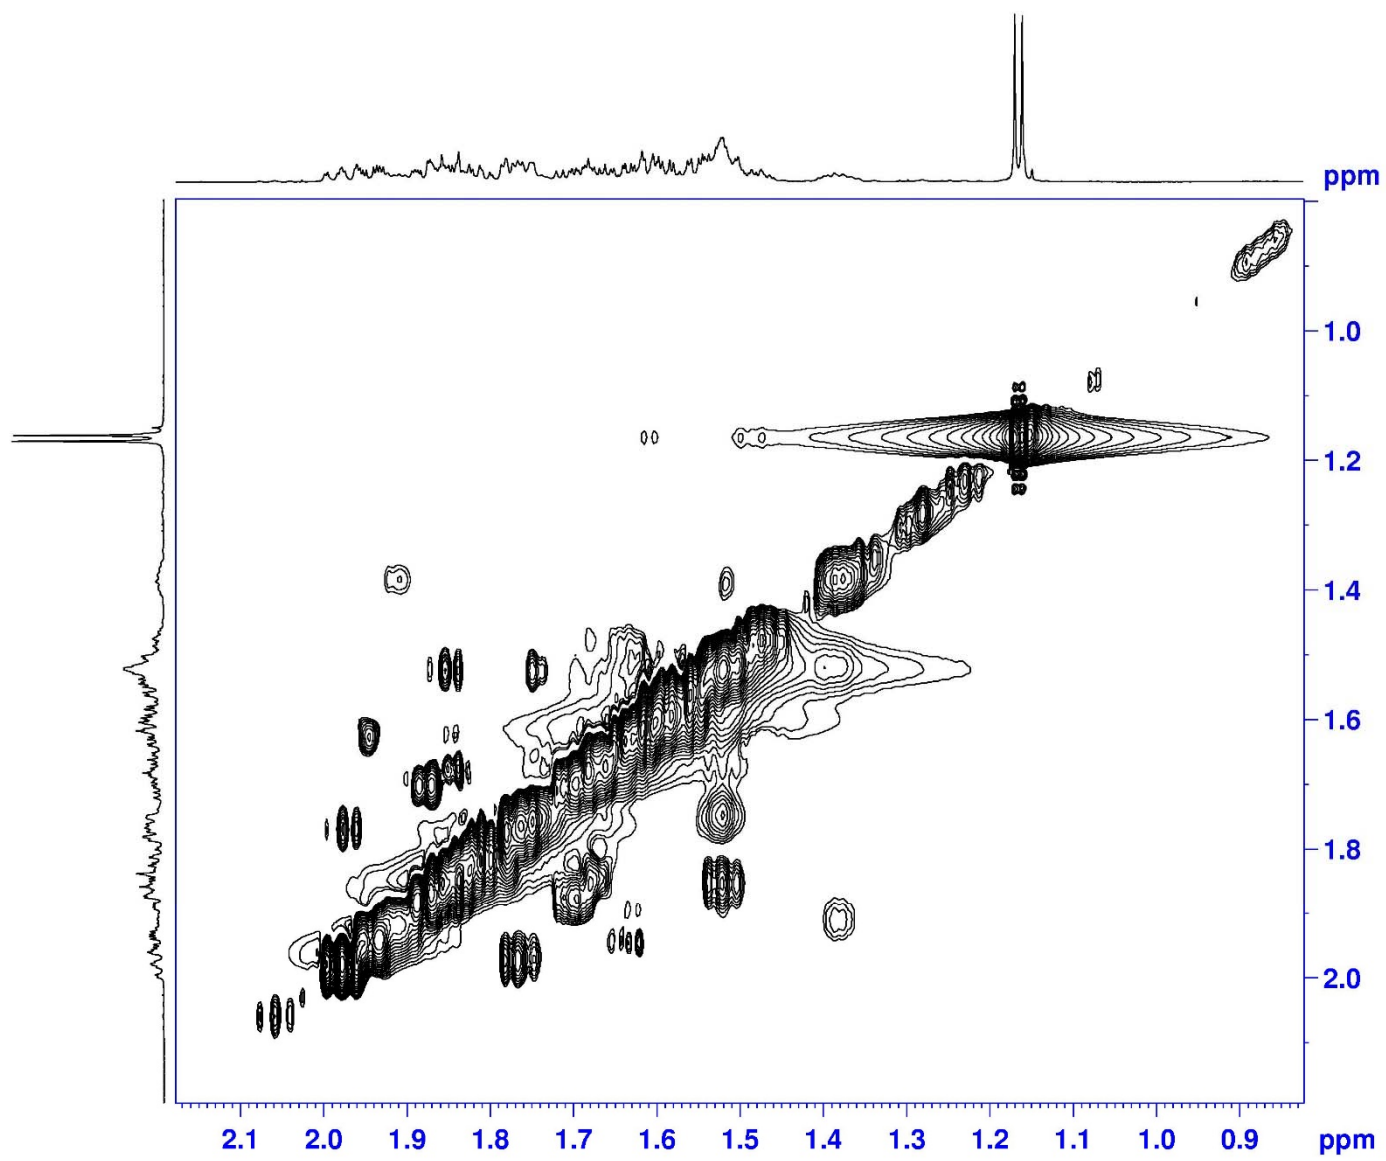



NOESY (700 MHz) spectrum of the fragment **1c** in CD<sub>3</sub>OD

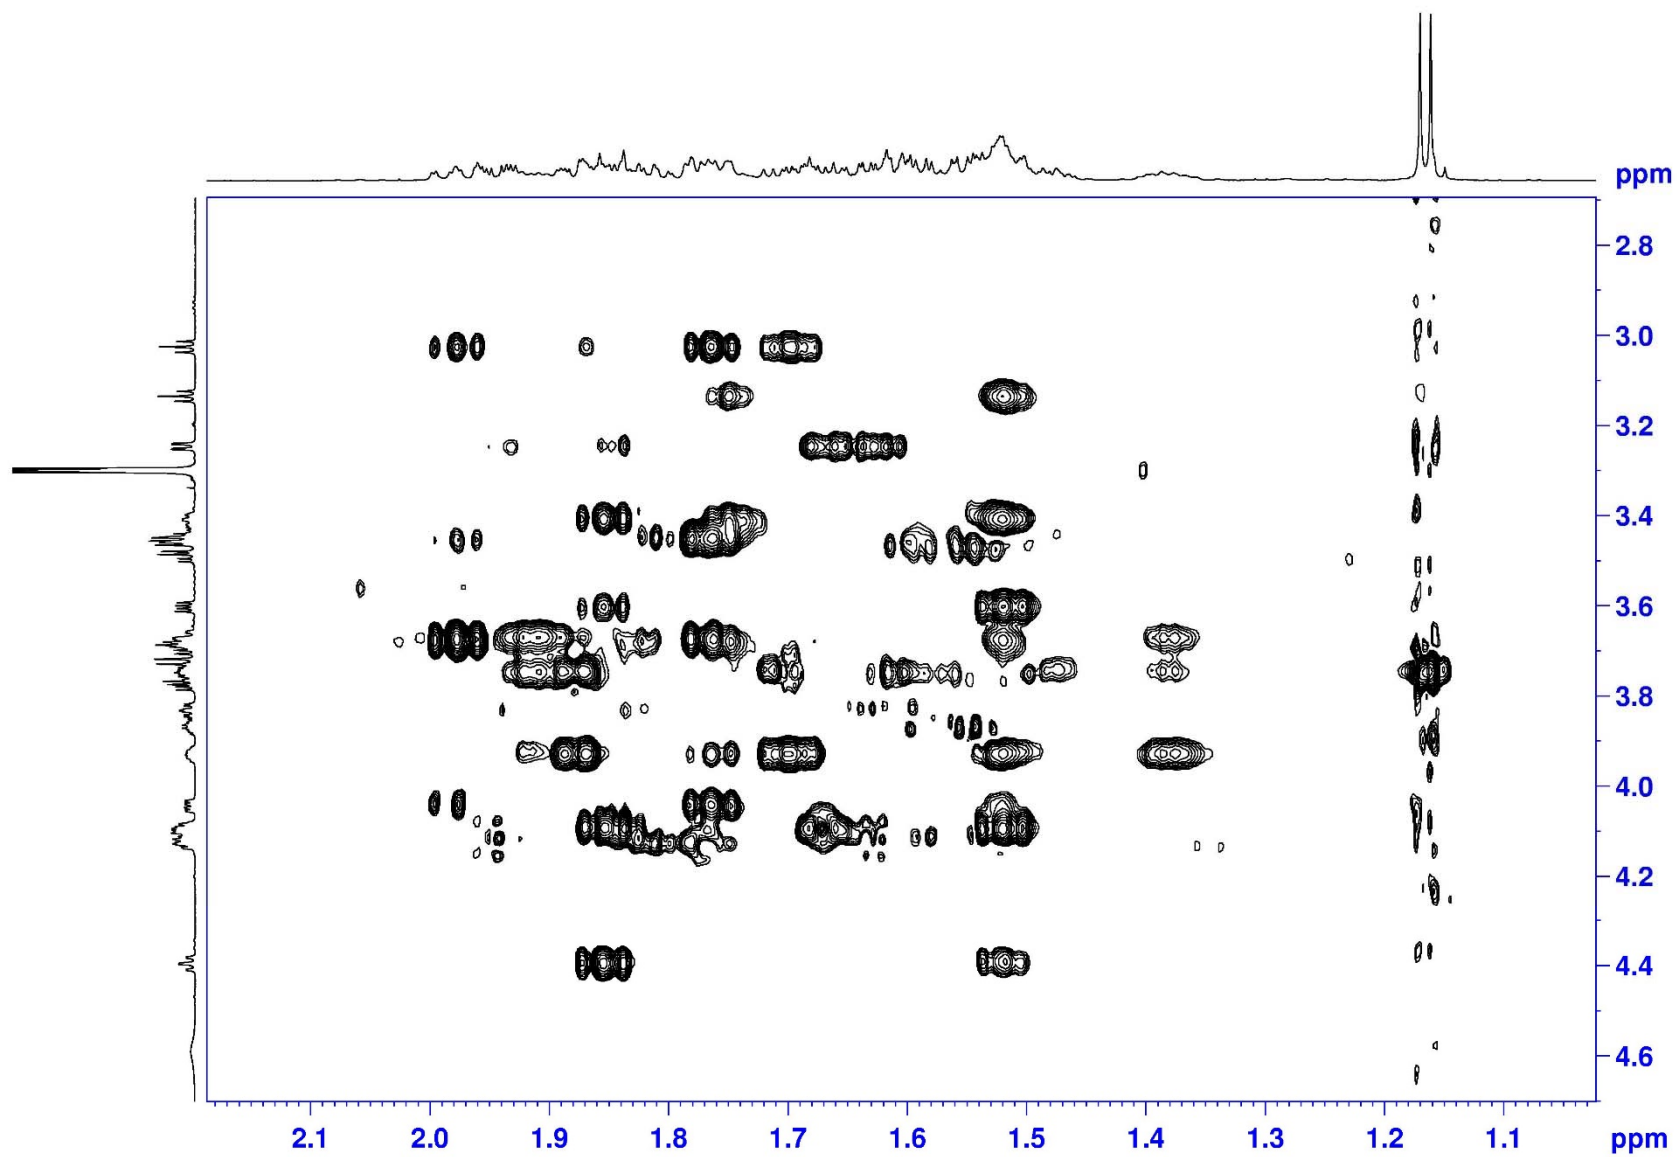

# 2D JRES (700 MHz) spectrum of the fragment **1c** in CD<sub>3</sub>OD

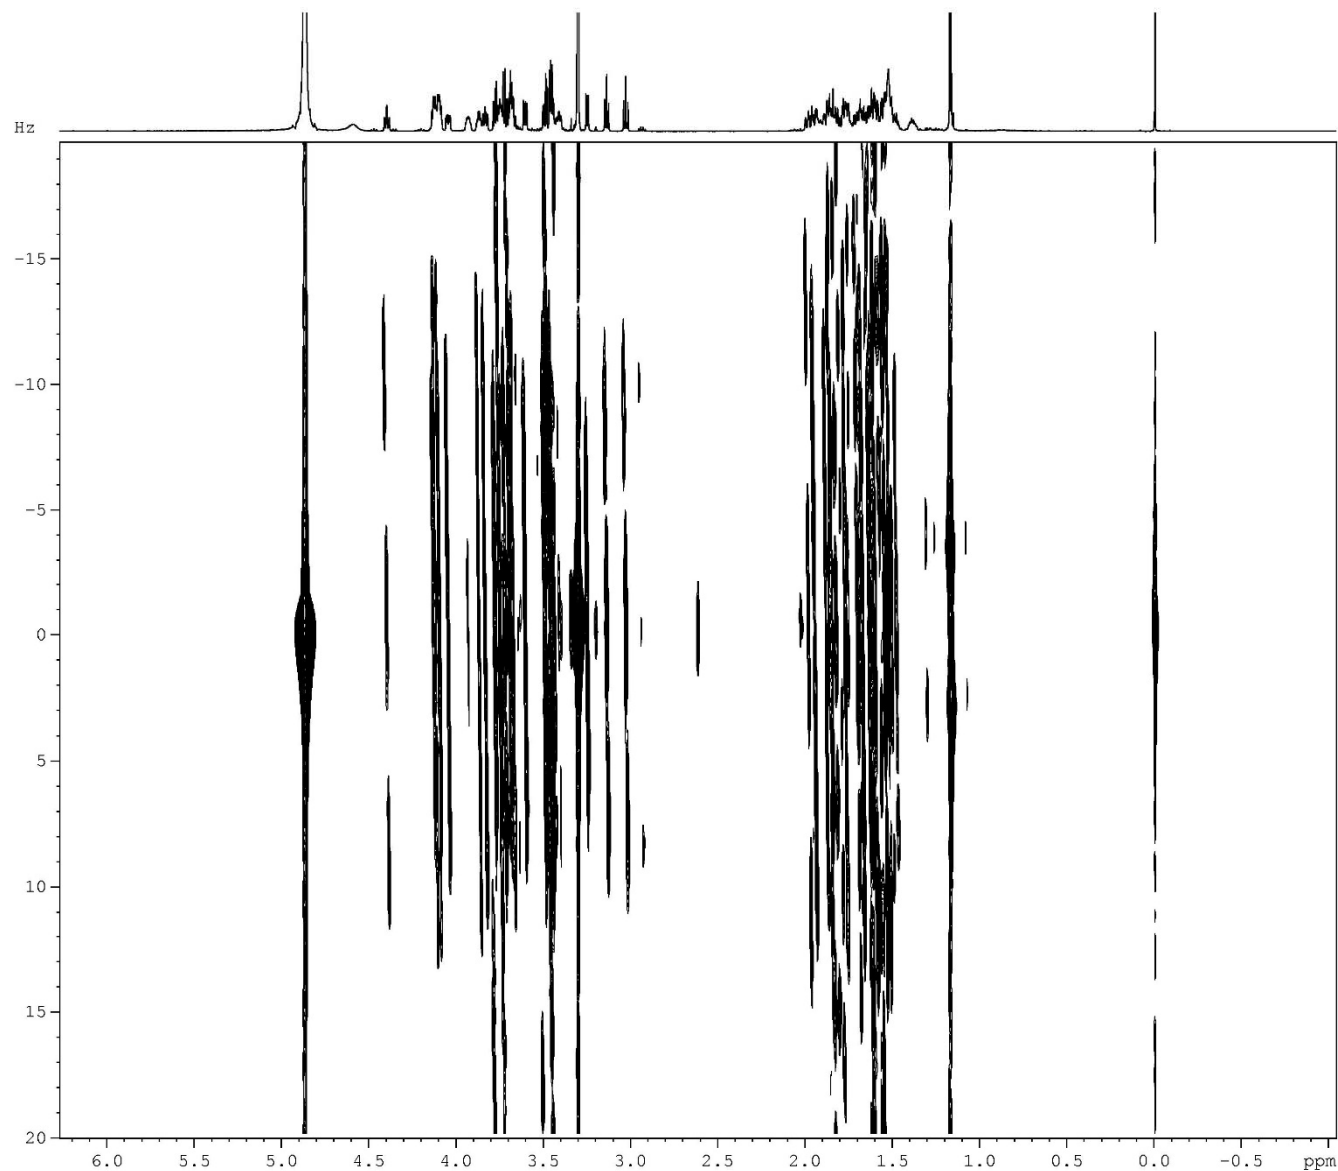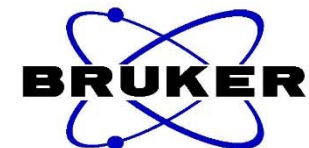

```
NAME      liwanshan-40-2-2-0:
EXPNO     22
PROCNO    1
Date_     20200330
Time      15.26 h
INSTRUM   spect
PROBHD    z120187_0028 (
PULPROG   jresgprqf
TD         8192
SOLVENT   MeOD
NS         128
DS         16
SWH        5122.951 Hz
FIDRES     1.250720 Hz
AQ         0.7995892 sec
RG         136.72
DW         97.600 usec
DE         10.00 usec
TE         298.0 K
D0         0.00000300 sec
D1         1.00000000 sec
D11        0.03000000 sec
D12        0.00002000 sec
D16        0.00020000 sec
IN0        0.01250000 sec
ND0        2
TD         40
SF01      700.1819 MHz
FIDRES     1.000000 Hz
SW         0.057 ppm
FnMODE     QF
SI         16384
SF         700.1800232 MHz
WDW        SINE
SSB        0
LB         0.00 Hz
GB         0
PC         1.00
SI         128
MC2        QF
SF         700.1818520 MHz
WDW        SINE
SSB        0
LB         0.00 Hz
GB         0
```

2D *J*RES (700 MHz) spectrum of the fragment **1c** in CD<sub>3</sub>OD

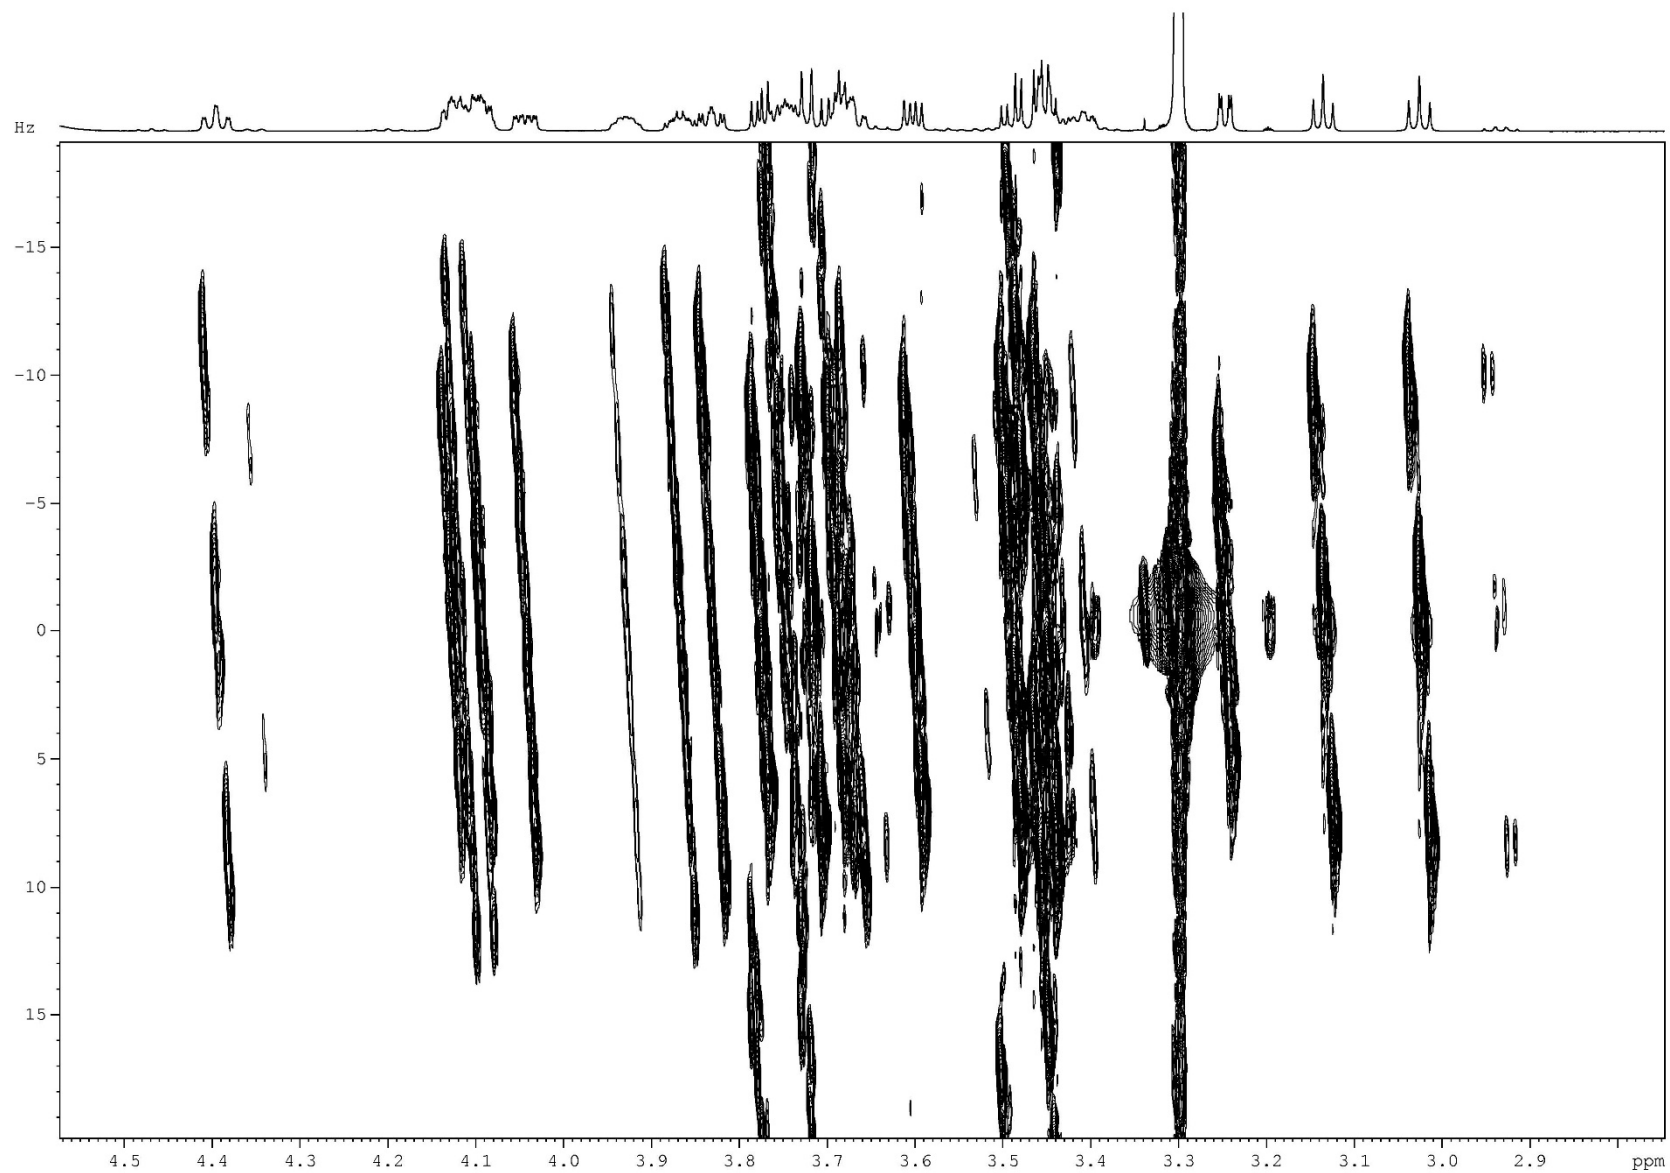

2D JRES (700 MHz) spectrum of the fragment **1c** in CD<sub>3</sub>OD

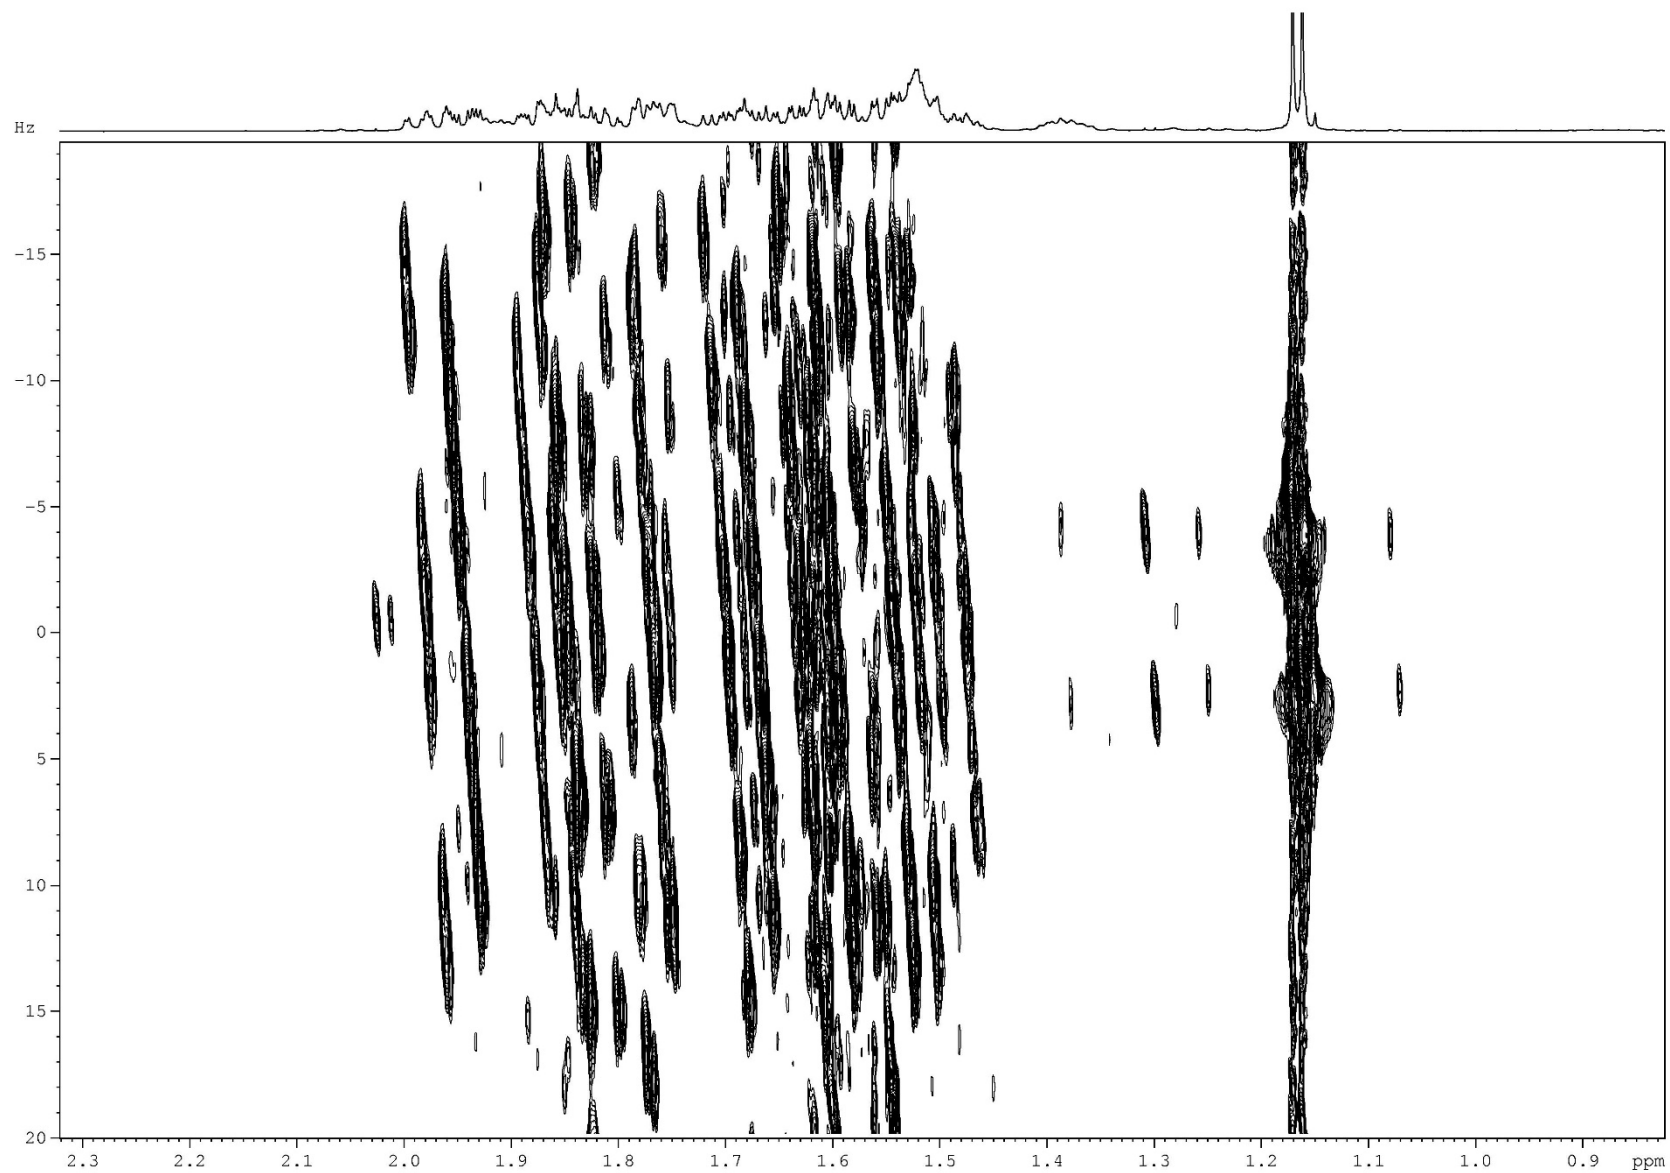

# HECADE (700 MHz) spectrum of the fragment **1c** in CD<sub>3</sub>OD

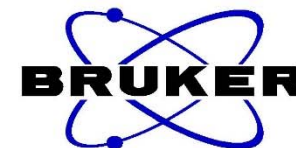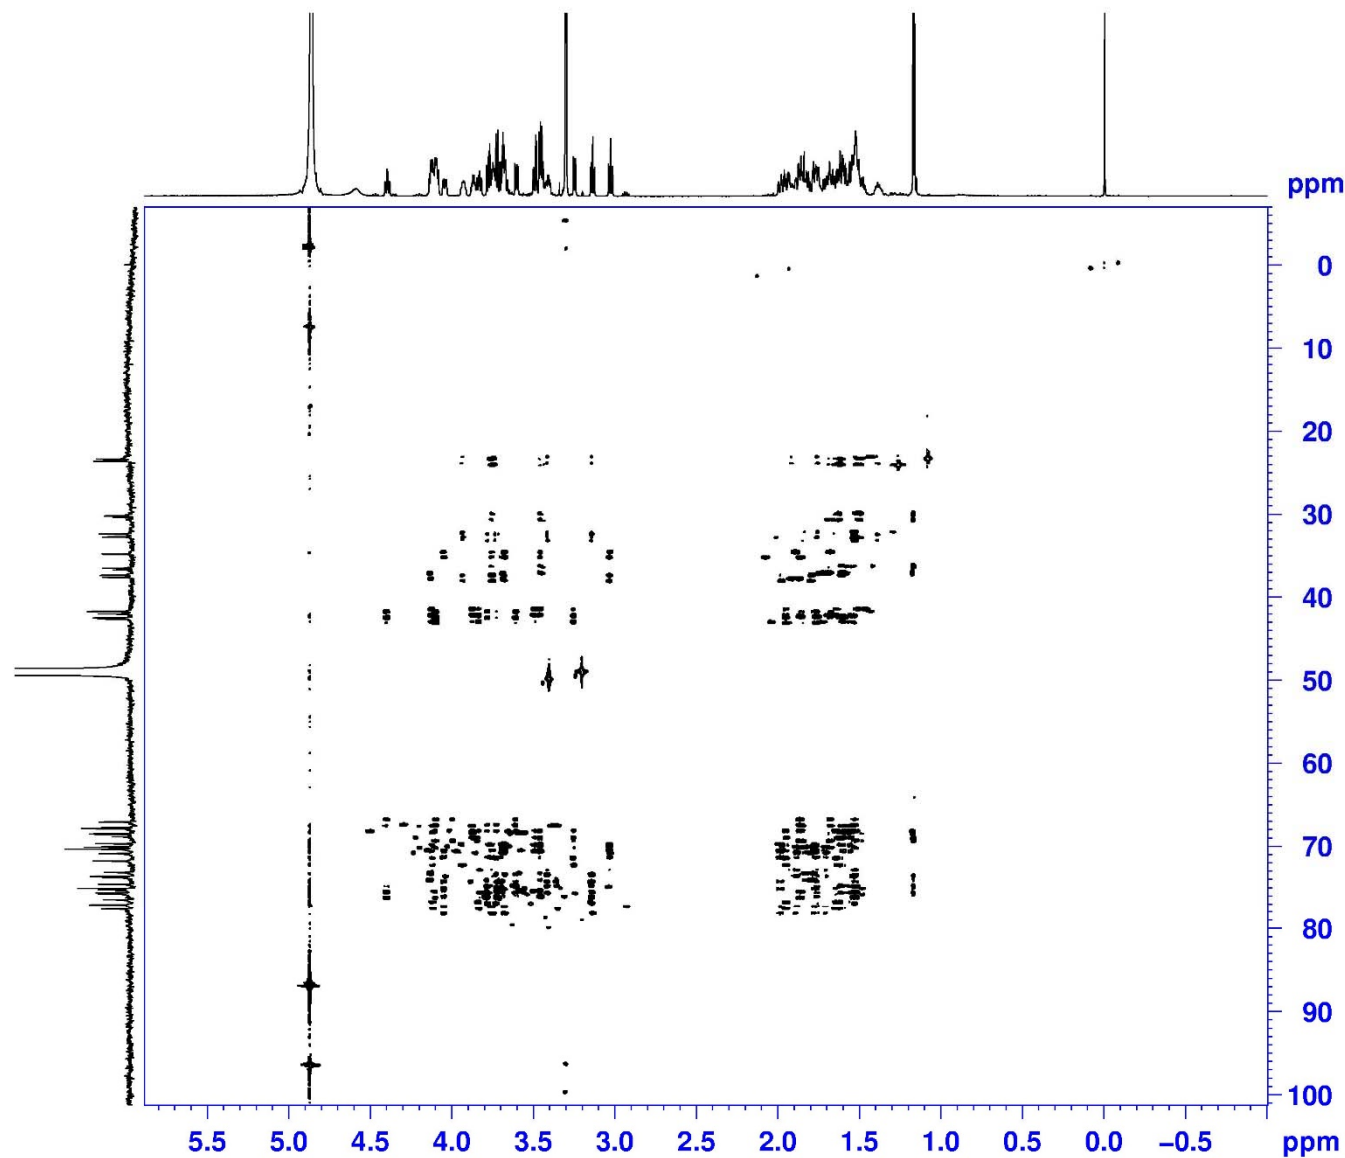

|         |                       |
|---------|-----------------------|
| NAME    | liwanshan-40-2-2-03-3 |
| EXPNO   | 25                    |
| PROCNO  | 1                     |
| Date_   | 20200820              |
| Time    | 2.37 h                |
| INSTRUM | spect                 |
| PROBHD  | Z120187_0028 (        |
| PULPROG | hsqc dietgppjncdsisp  |
| TD      | 4096                  |
| SOLVENT | MeOD                  |
| NS      | 56                    |
| DS      | 16                    |
| SWH     | 4826.255 Hz           |
| FIDRES  | 2.356570 Hz           |
| AQ      | 0.4243956 sec         |
| RG      | 181.26                |
| DW      | 103.600 usec          |
| DE      | 10.00 usec            |
| TE      | 298.0 K               |
| CNST2   | 145.0000000           |
| CNST16  | 1.0000000             |
| CNST17  | -0.5000000            |
| D0      | 0.00000300 sec        |
| D1      | 1.00000000 sec        |
| D2      | 0.00344828 sec        |
| D4      | 0.00172414 sec        |
| D9      | 0.08000000 sec        |
| D16     | 0.00020000 sec        |
| D20     | 0.00000300 sec        |
| D24     | 0.00089000 sec        |
| IN0     | 0.00002620 sec        |
| IN20    | 0.00002620 sec        |
| L0      | 1                     |
| L1      | 28                    |
| ND0     | 2                     |
| TD      | 512                   |
| SF01    | 176.0684 MHz          |
| FIDRES  | 37.273376 Hz          |
| SW      | 108.389 ppm           |
| FnMODE  | Echo-Antiecho         |
| SI      | 8192                  |
| SF      | 700.1800200 MHz       |
| WDW     | QSINE                 |
| SSB     | 2                     |
| LB      | 0.00 Hz               |
| GB      | 0                     |
| PC      | 1.40                  |
| SI      | 1024                  |
| MC2     | echo-antiecho         |
| SF      | 176.0601510 MHz       |
| WDW     | QSINE                 |
| SSB     | 2                     |
| LR      | 0 00 Hz               |

HECADE (700 MHz) spectrum of the fragment **1c** in CD<sub>3</sub>OD

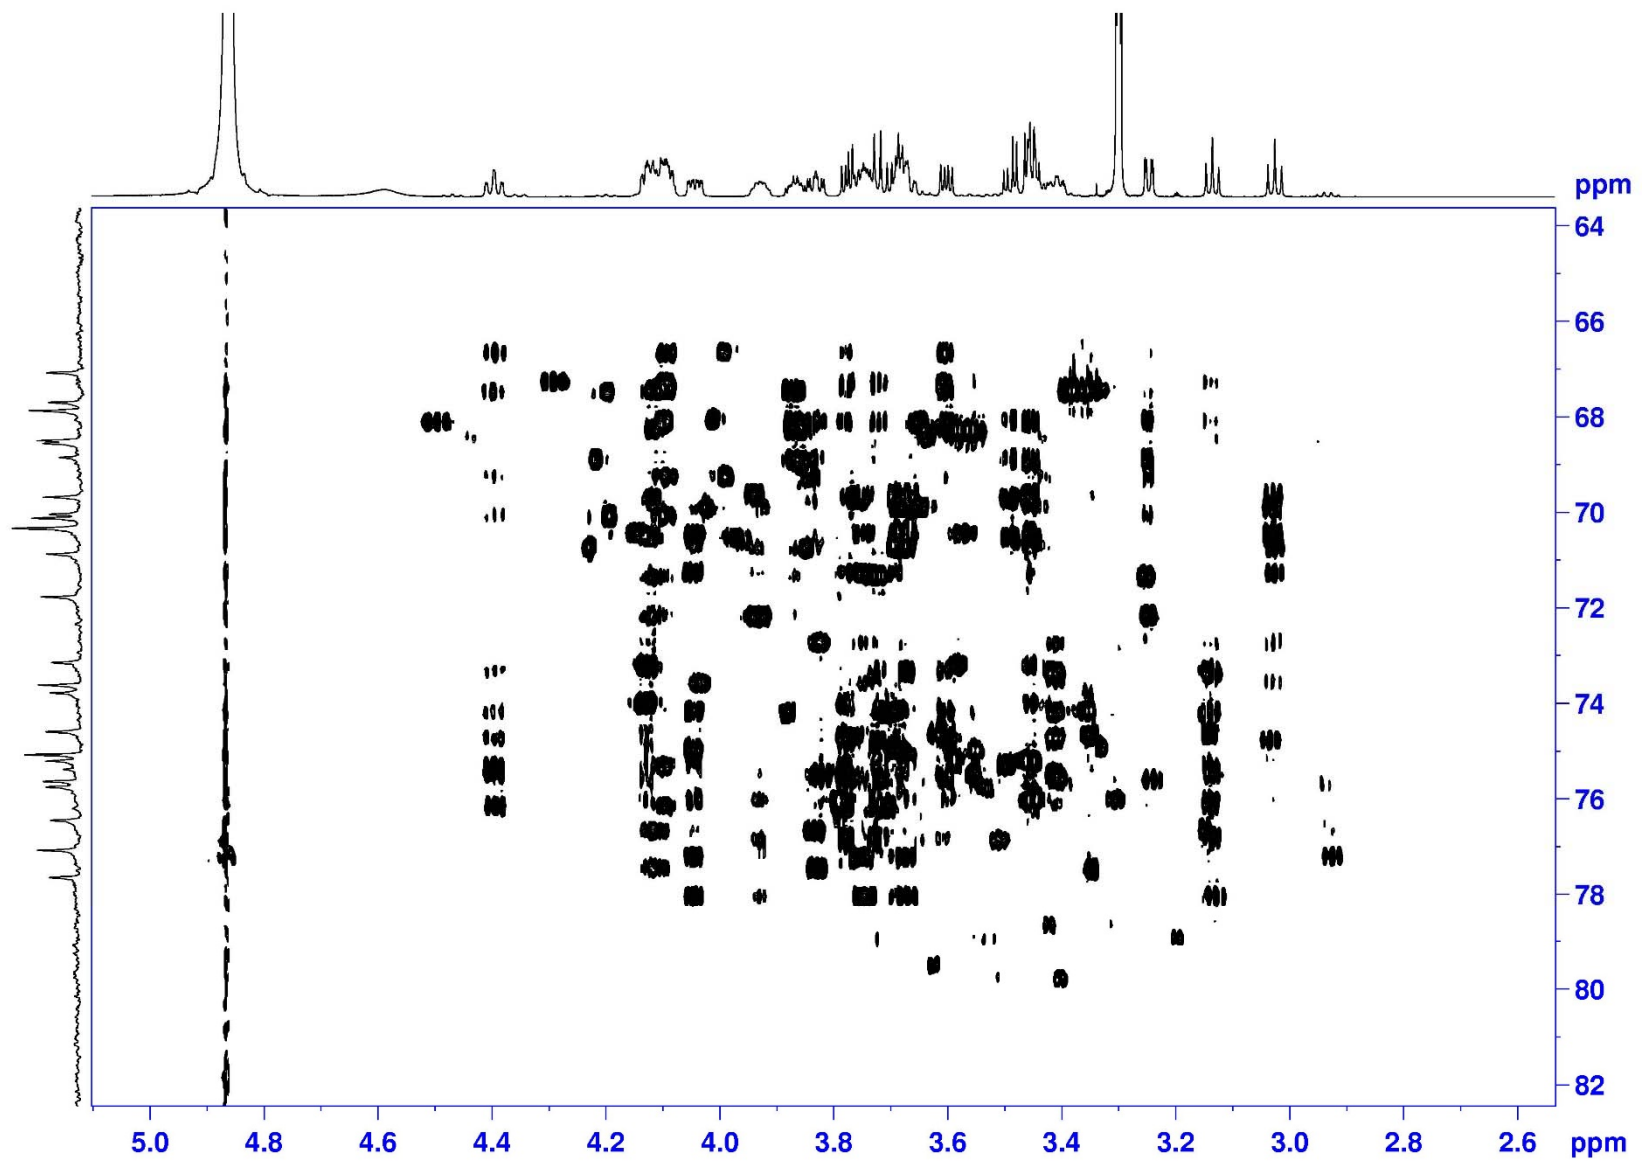

HECADE (700 MHz) spectrum of the fragment **1c** in CD<sub>3</sub>OD

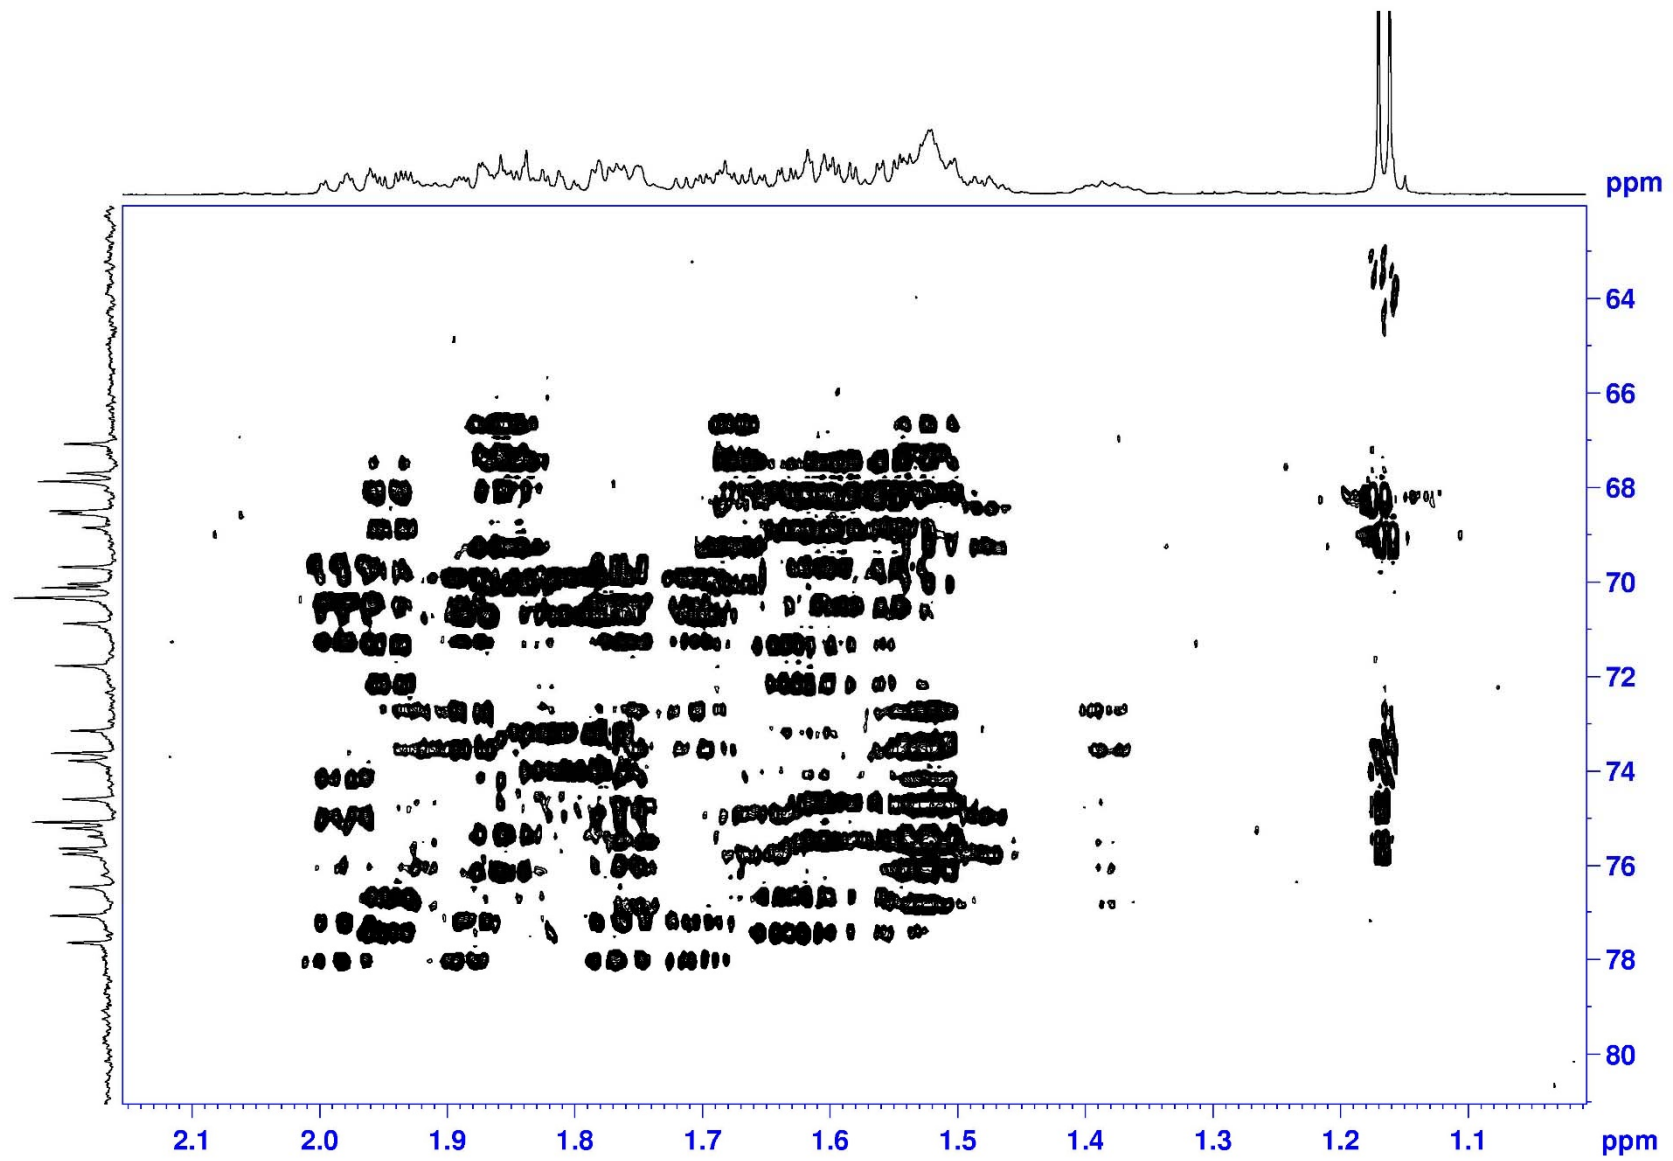

HECADE (700 MHz) spectrum of the fragment **1c** in CD<sub>3</sub>OD

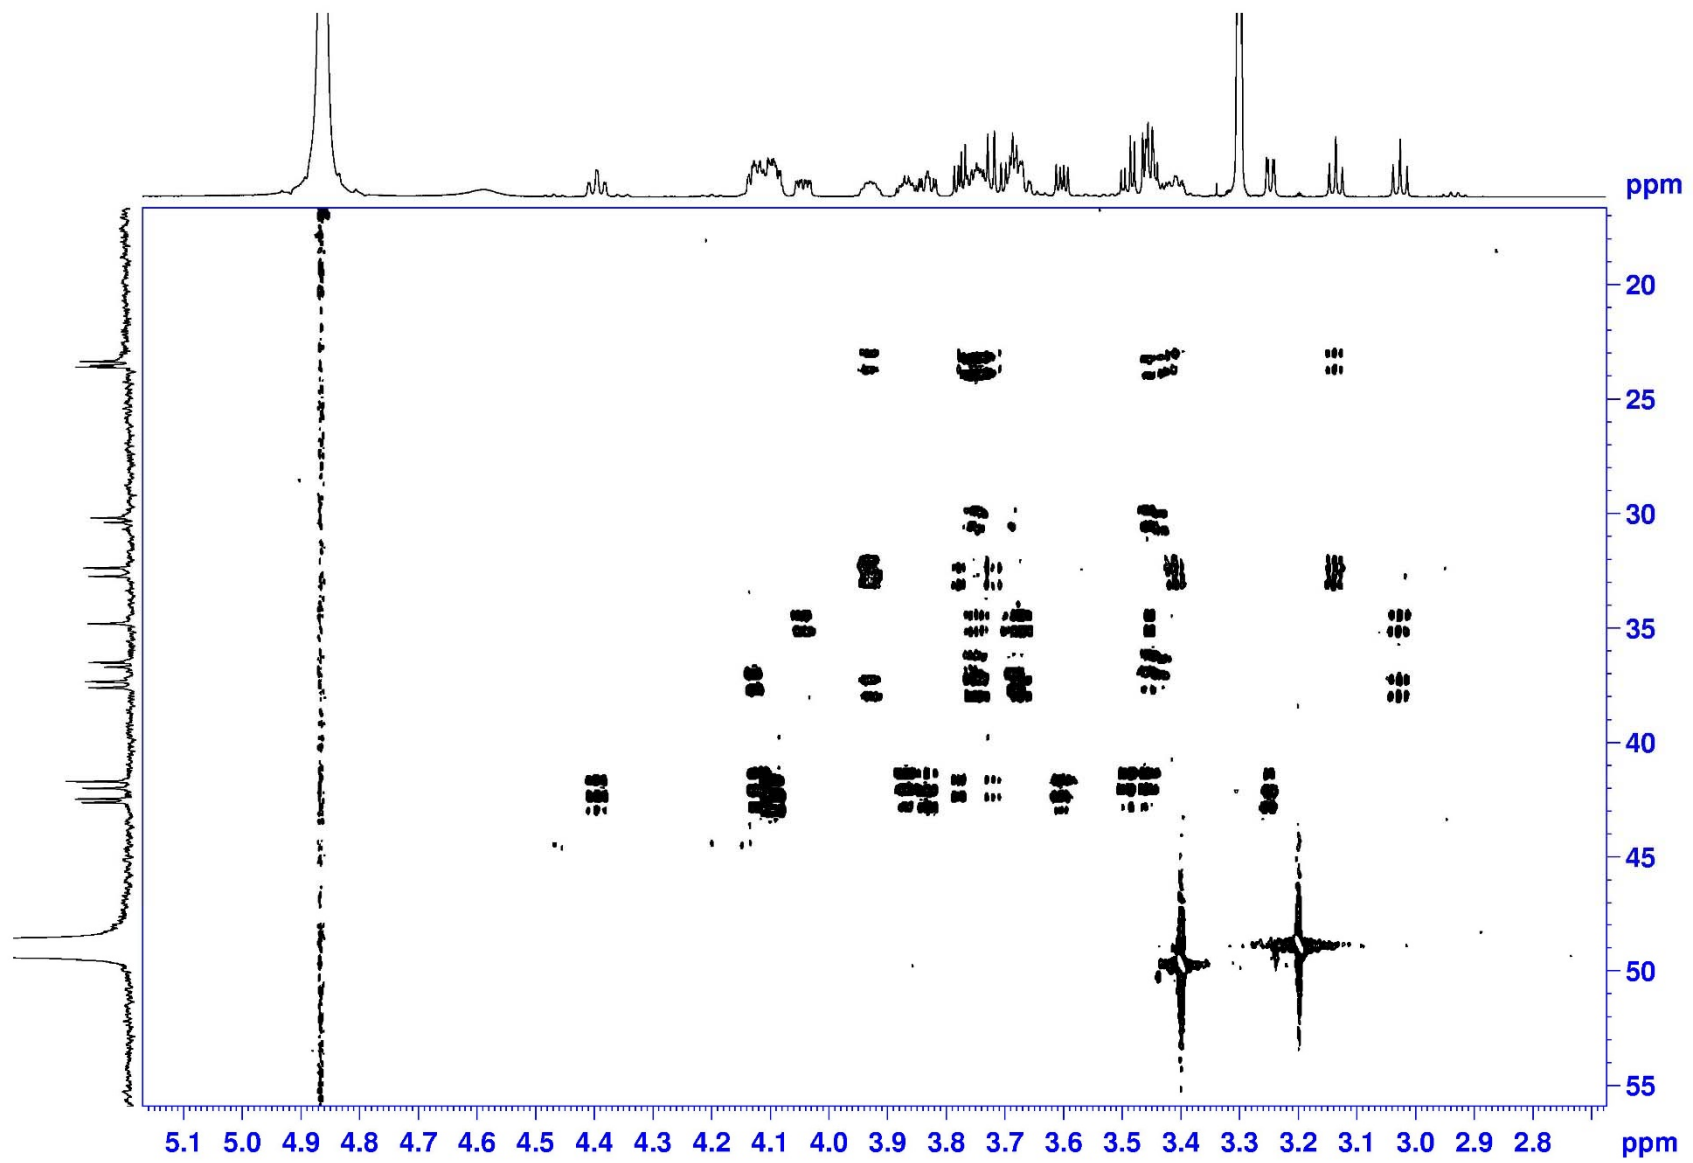



HECADE (700 MHz) spectrum of the fragment **1c** in CD<sub>3</sub>OD

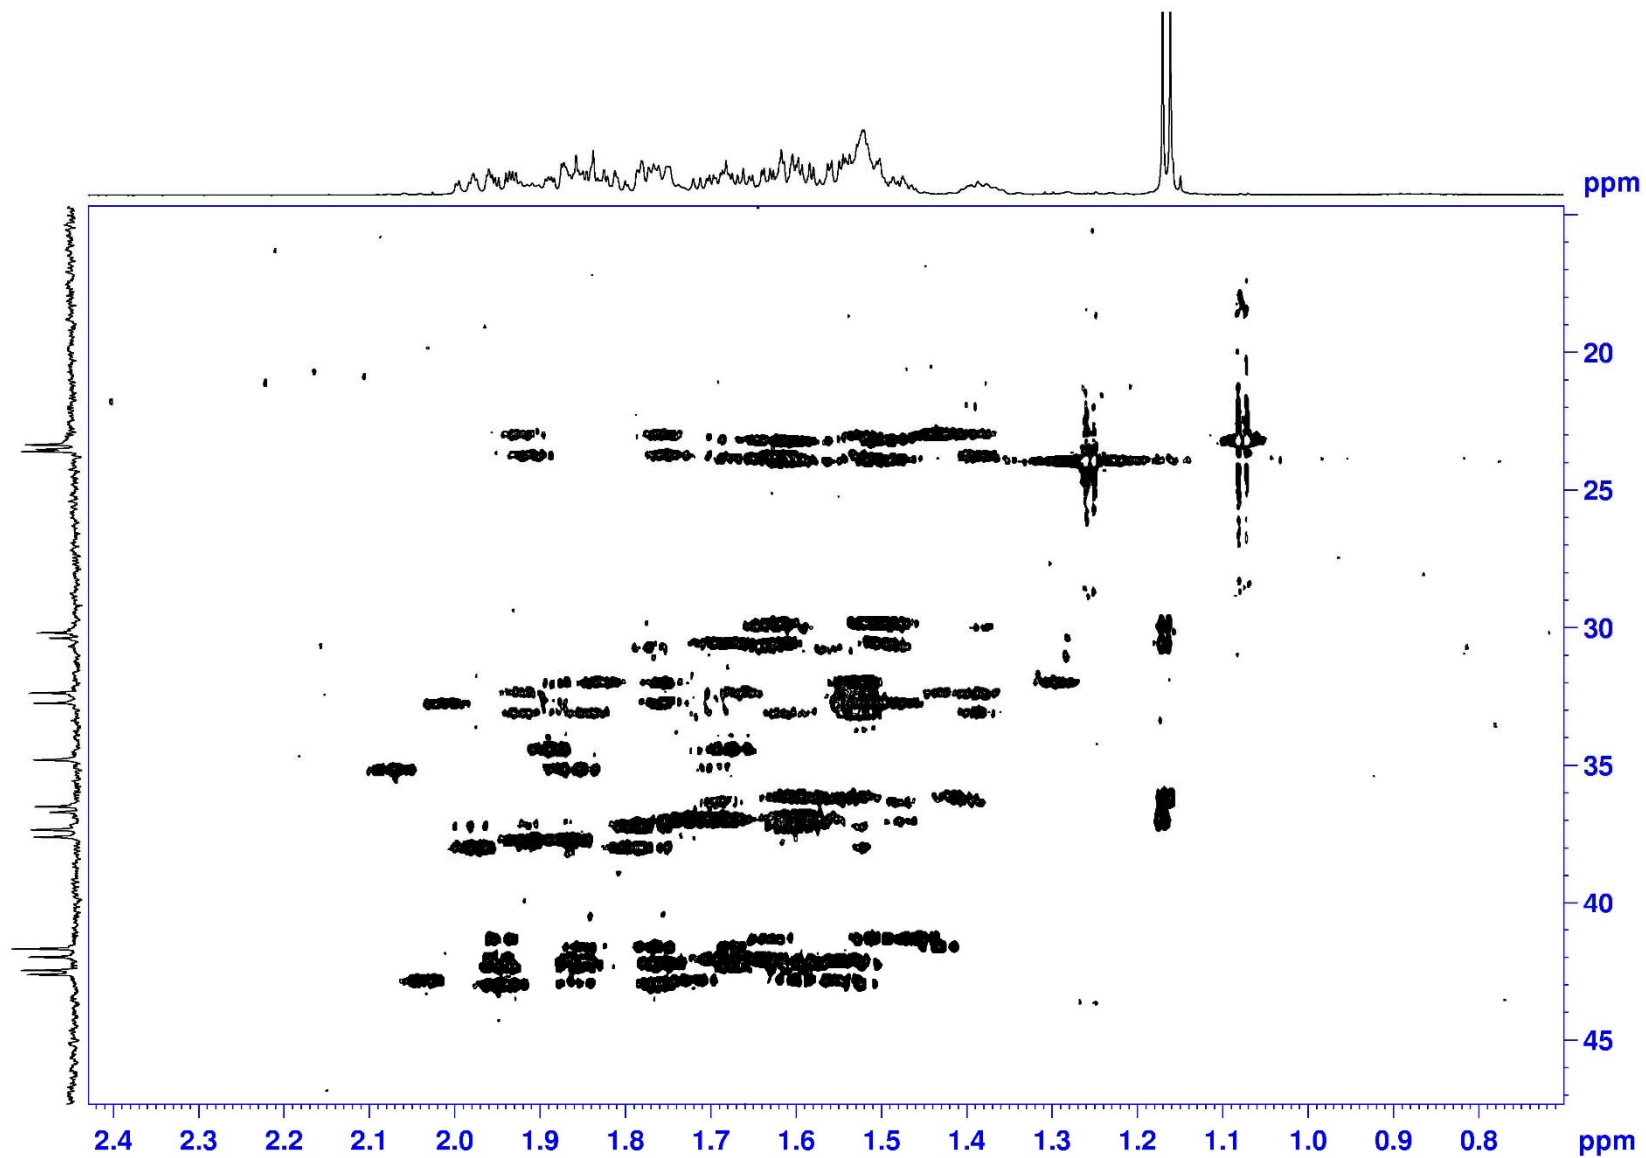

# LR-ESI-MS for the fragment **1as**

## Generic Display Report

### Analysis Info

Analysis Name D:\Data\amaZon SL\MS\data\202008\liwanshan\_40-2-2-03-1-R-Cl\_34\_01\_2059.d  
Method 2059.m  
Sample Name liwanshan\_40-2-2-03-1-R-Cl  
Comment

Acquisition Date 2020-08-21 16:35:57  
Operator bruker  
Instrument amaZon SL

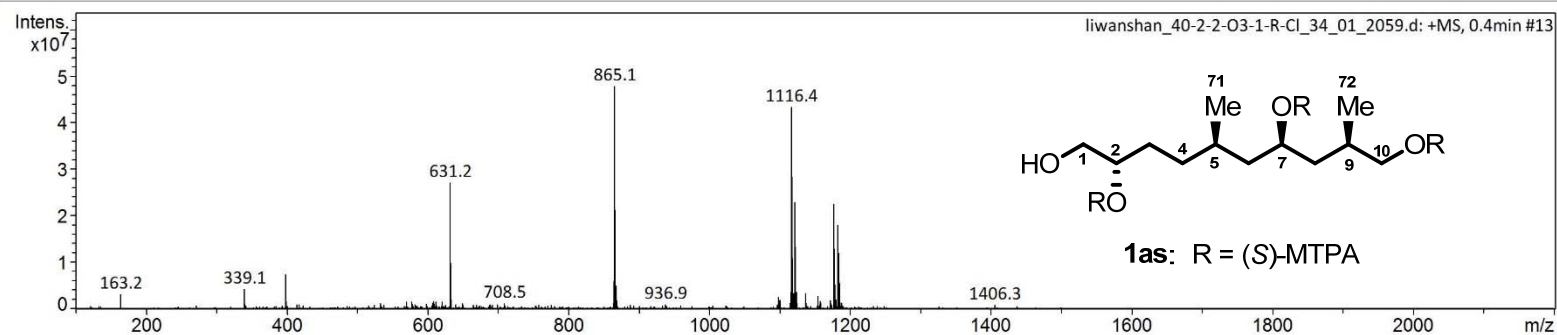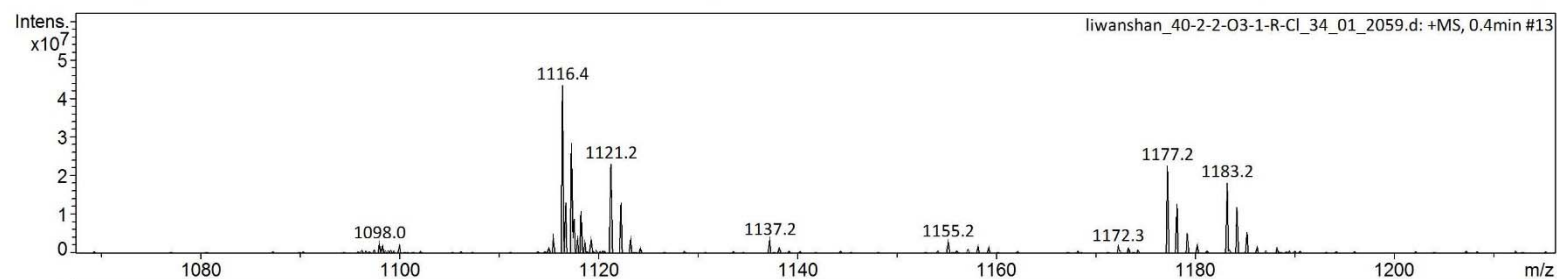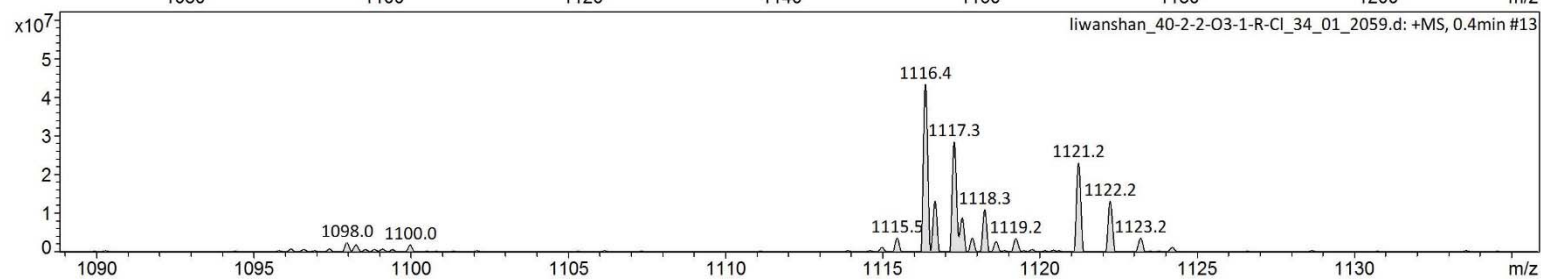

# $^1\text{H}$ (400 MHz) NMR spectrum of the fragment **1as** in $\text{CD}_3\text{OD}$

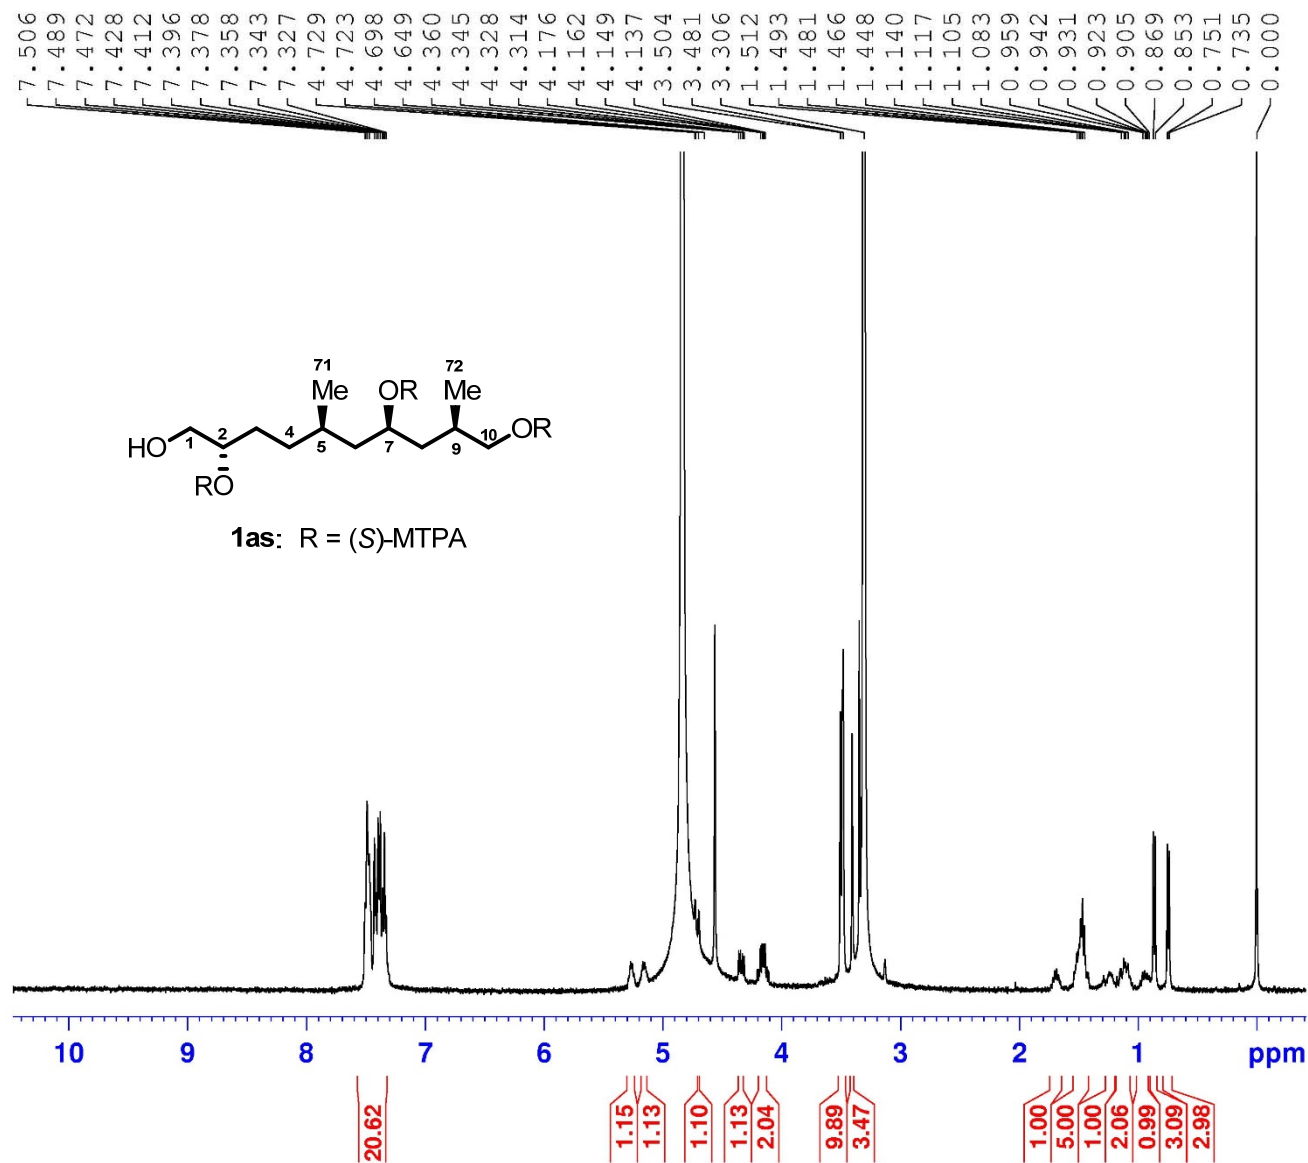

```

NAME      40-2-2-03-1-R-C1
EXPNO     1
PROCNO    1
Date_     20200425
Time      10.26
INSTRUM   spect
PROBHD    5 mm PABBO BB/
PULPROG   zg30
TD         65536
SOLVENT   MeOD
NS         32
DS         2
SWH       8012.820 Hz
FIDRES    0.122266 Hz
AQ         4.0894966 sec
RG         177.07
DW         62.400 usec
DE         6.50 usec
TE         300.0 K
D1         1.00000000 sec
TD0        1
    
```

```

===== CHANNEL f1 =====
SFO1     400.1324710 MHz
NUC1      1H
P1        9.73 usec
SI        65536
SF        400.1300091 MHz
WDW       EM
SSB       0
LB        0.30 Hz
GB         0
PC         1.00
    
```

$^1\text{H}$  (400 MHz) NMR spectrum of the fragment **1as** in  $\text{CD}_3\text{OD}$

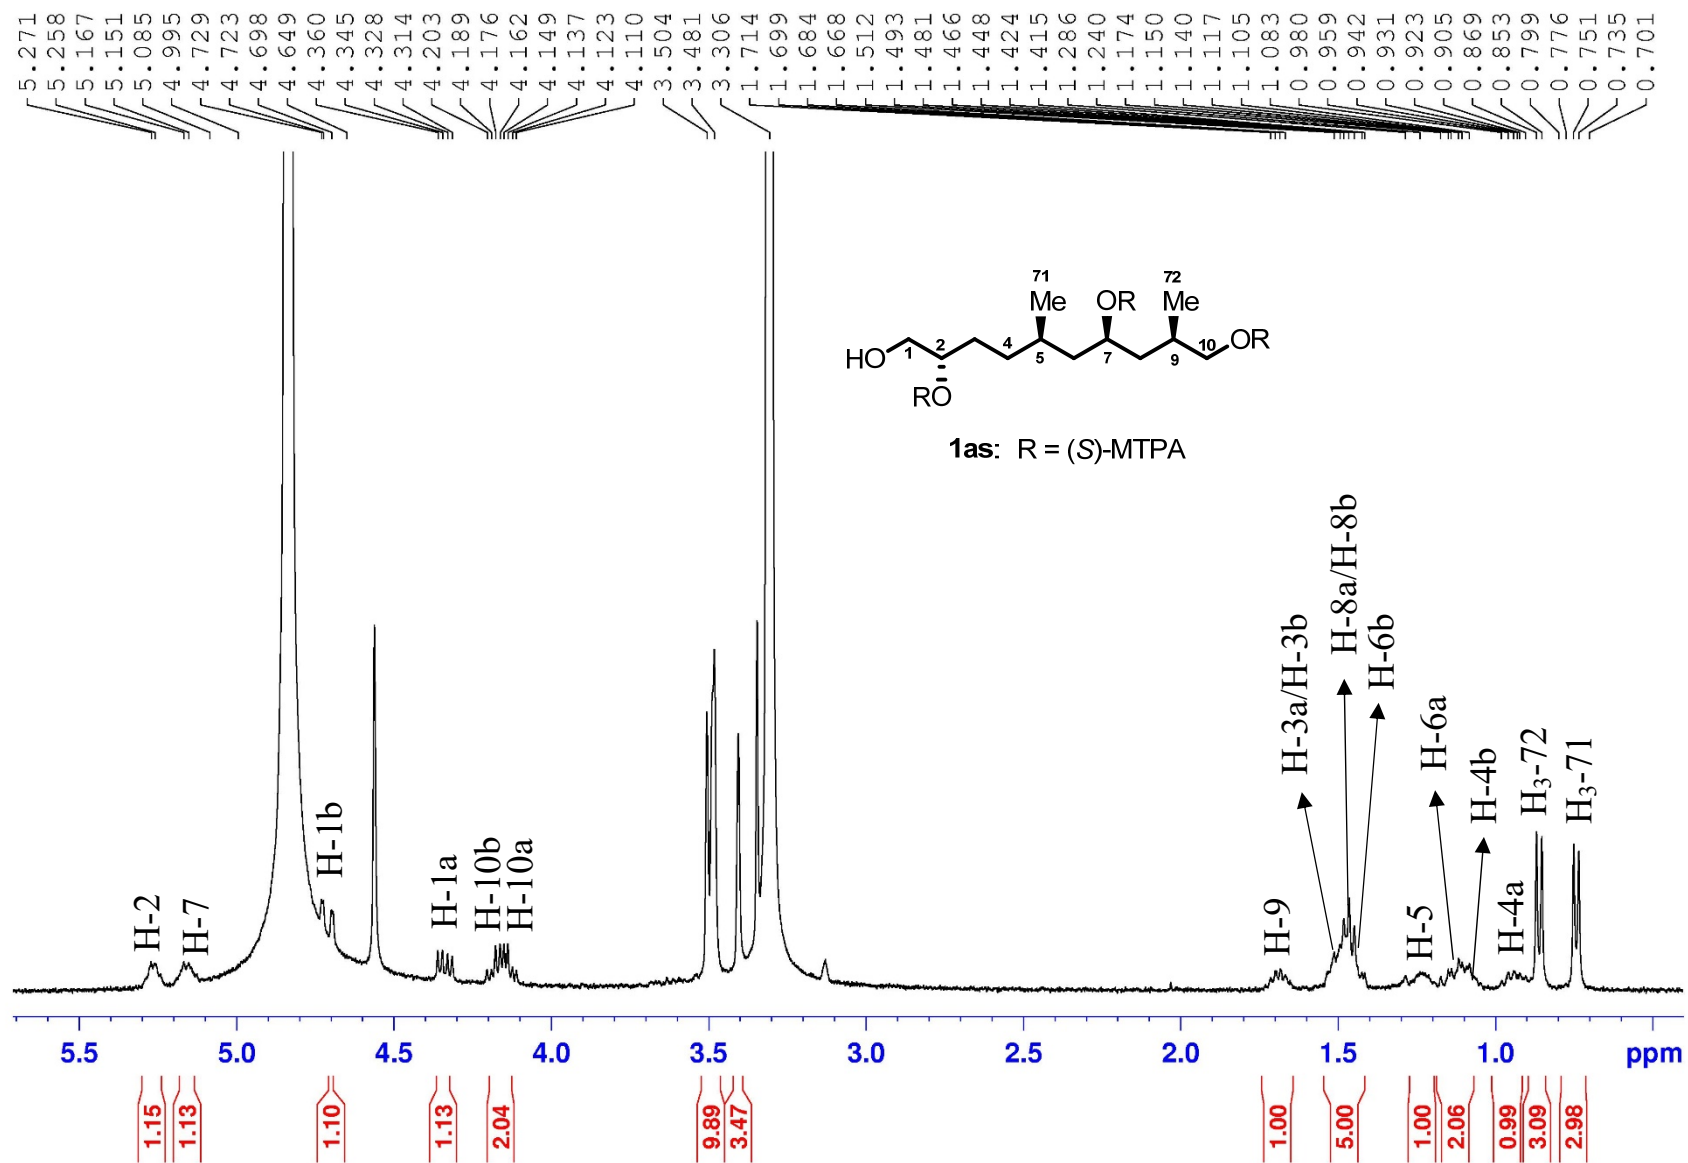

$^1\text{H}$  (400 MHz) NMR spectrum of the fragment **1as** in  $\text{CD}_3\text{OD}$

— 4.203  
— 4.189  
— 4.176  
— 4.162  
— 4.149  
— 4.137  
— 4.123  
— 4.110

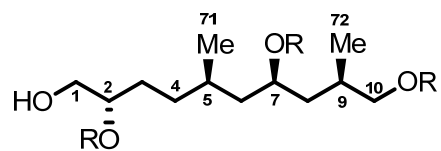

**1as**: R = (S)-MTPA

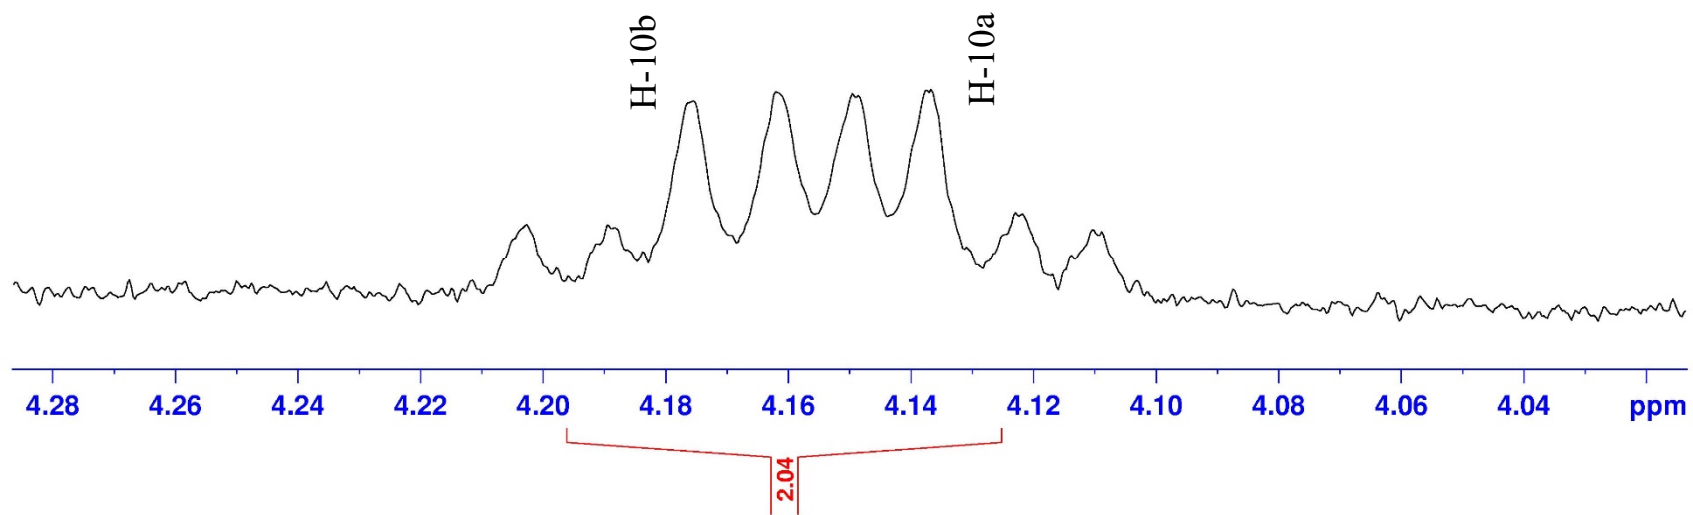

# $^1\text{H}$ - $^1\text{H}$ COSY (400 MHz) spectrum of the fragment **1as** in $\text{CD}_3\text{OD}$

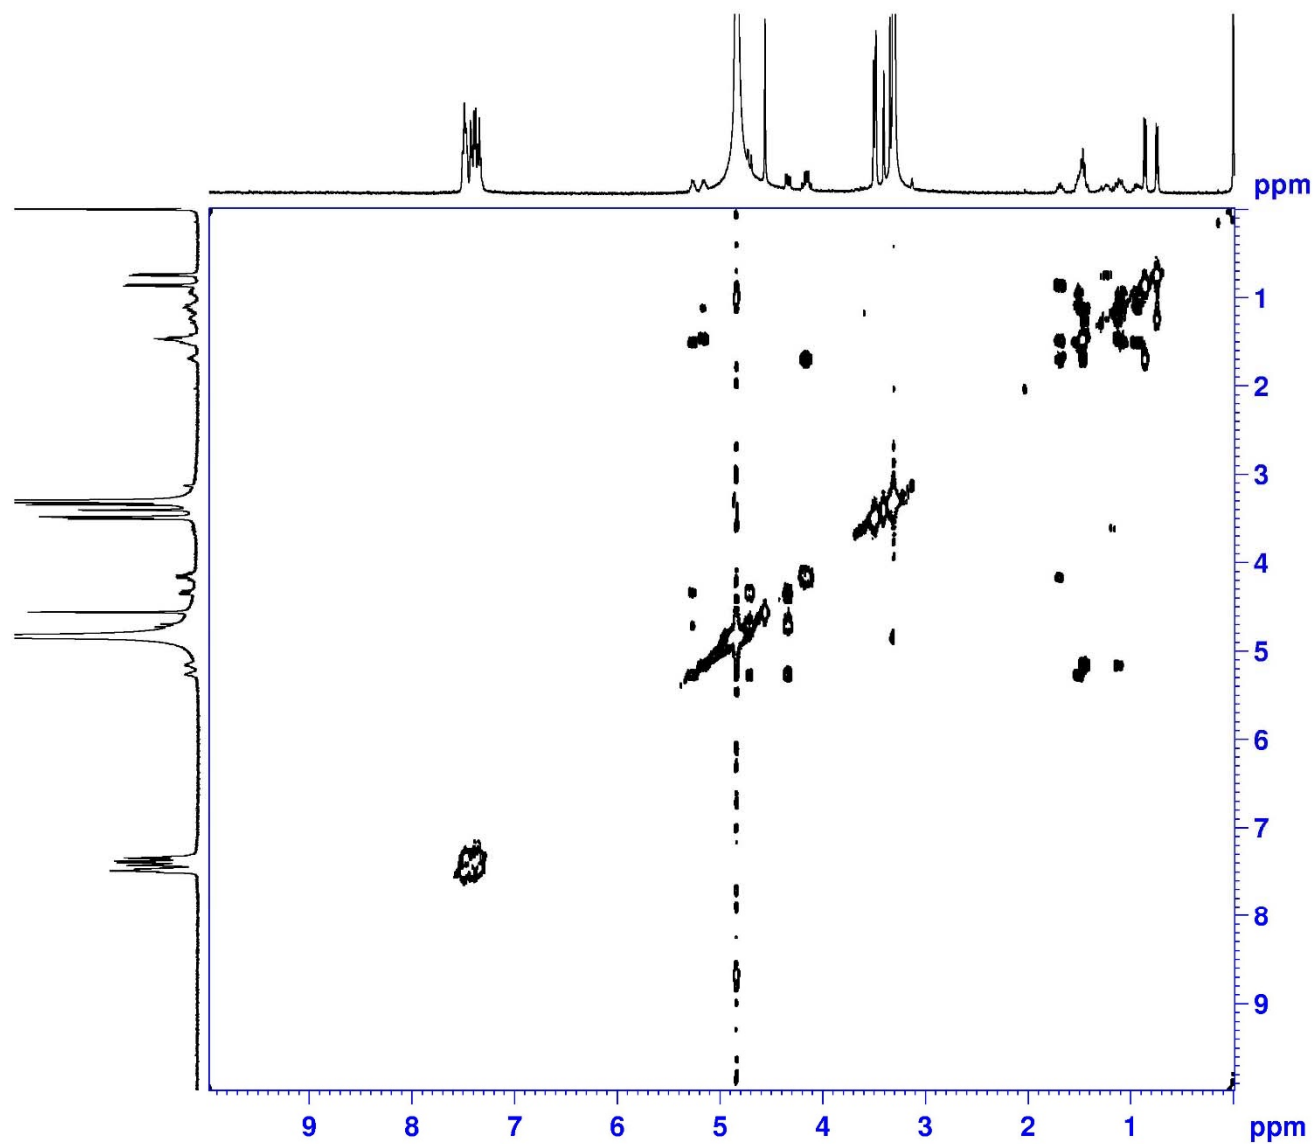

```
NAME      40-2-2-03-1-R-C1
EXPNO     2
PROCNO    1
Date_     20200425
Time      10.34
INSTRUM   spect
PROBHD    5 mm PABBO BB/
PULPROG   cosygpgf
TD        2048
SOLVENT   MeOD
NS        100
DS        8
SWH       4000.000 Hz
FIDRES    1.953125 Hz
AQ        0.2560500 sec
RG        202.1
DW        125.000 usec
DE        6.50 usec
TE        300.0 K
D0        0.00000300 sec
D1        2.00000000 sec
D13       0.00000400 sec
D16       0.00020000 sec
IN0       0.00025000 sec
```

```
===== CHANNEL f1 =====
SFO1     400.1320007 MHz
NUC1     1H
P0       9.73 usec
P1       9.73 usec
ND0      1
TD       128
SFO1     400.132 MHz
FIDRES   31.250000 Hz
SW       9.997 ppm
FnMODE   QF
SI       1024
SF       400.1300091 MHz
WDW      QSINE
SSB      0
LB       0.00 Hz
GB       0
PC       1.40
SI       1024
MC2     QF
SF       400.1300091 MHz
WDW      QSINE
SSB      0
LB       0.00 Hz
```

$^1\text{H}$ - $^1\text{H}$  COSY (400 MHz) spectrum of the fragment **1as** in  $\text{CD}_3\text{OD}$

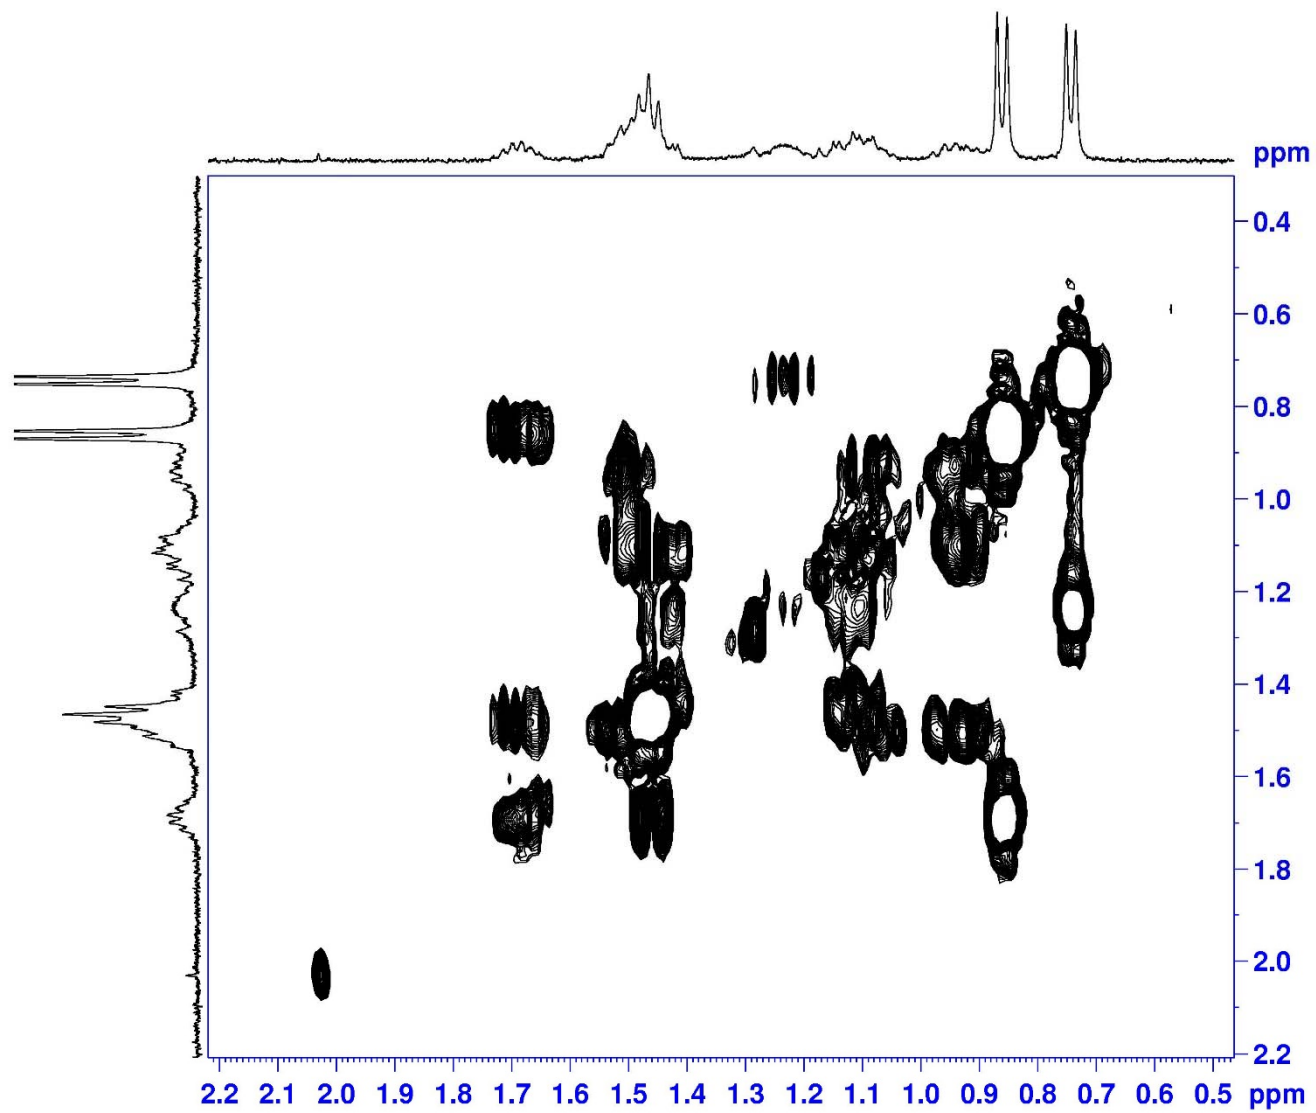

$^1\text{H}$ - $^1\text{H}$  COSY (400 MHz) spectrum of the fragment **1as** in  $\text{CD}_3\text{OD}$

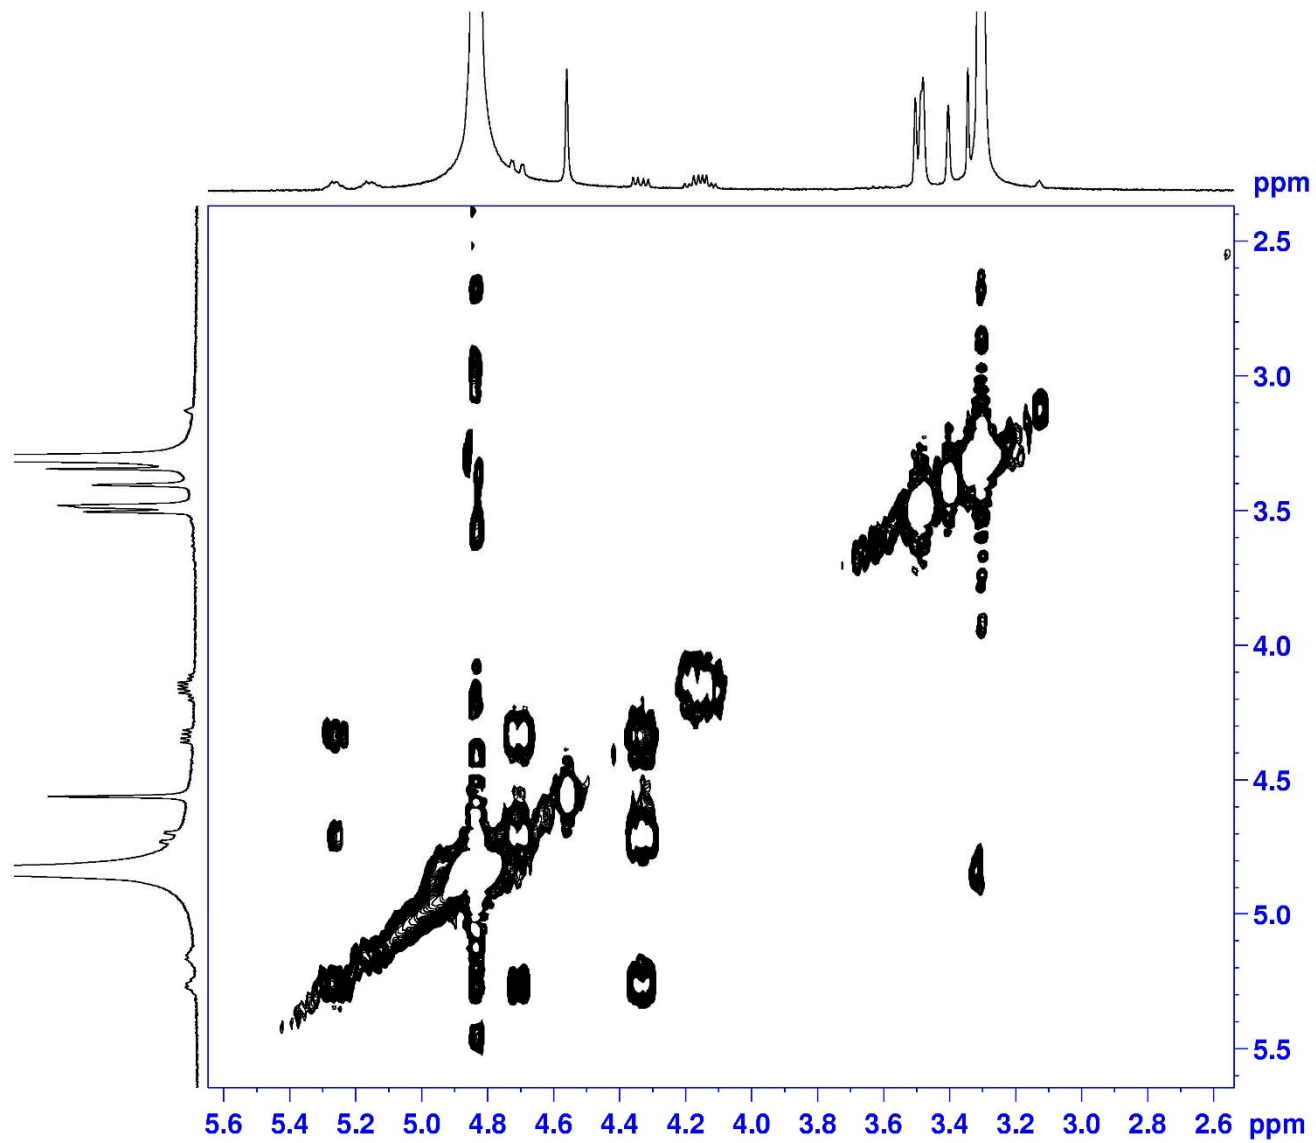



$^1\text{H}$ - $^1\text{H}$  COSY (400 MHz) spectrum of the fragment **1as** in  $\text{CD}_3\text{OD}$

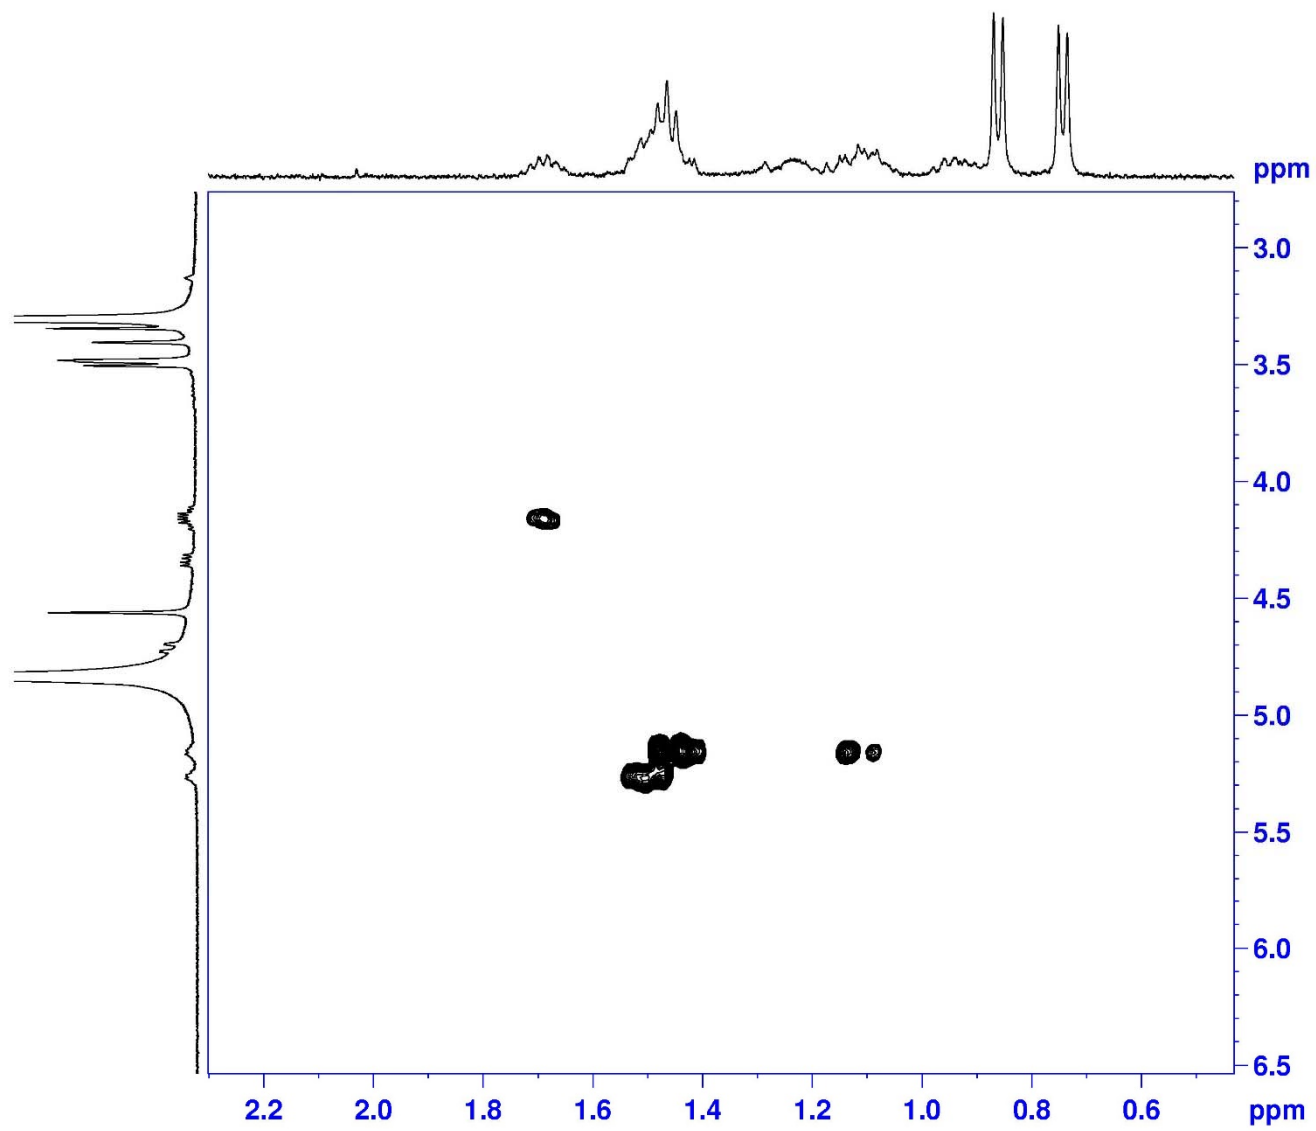

# LR-ESI-MS for the fragment **1ar**

## Generic Display Report

### Analysis Info

Analysis Name D:\Data\amaZon SL\MS\data\202008\liwanshan\_40-2-2-03-1-S-Cl\_33\_01\_2060.d  
Method 2060.m  
Sample Name liwanshan\_40-2-2-03-1-S-Cl  
Comment

Acquisition Date 2020-08-21 16:38:24  
Operator bruker  
Instrument amaZon SL

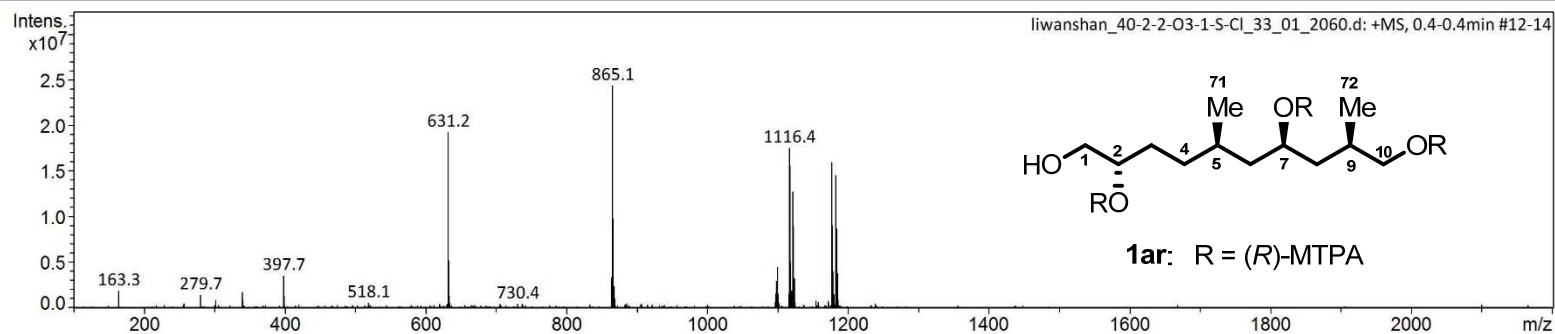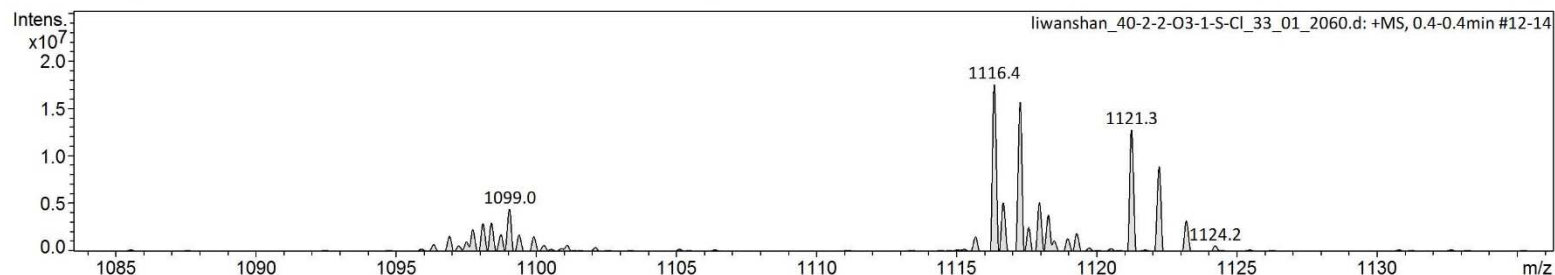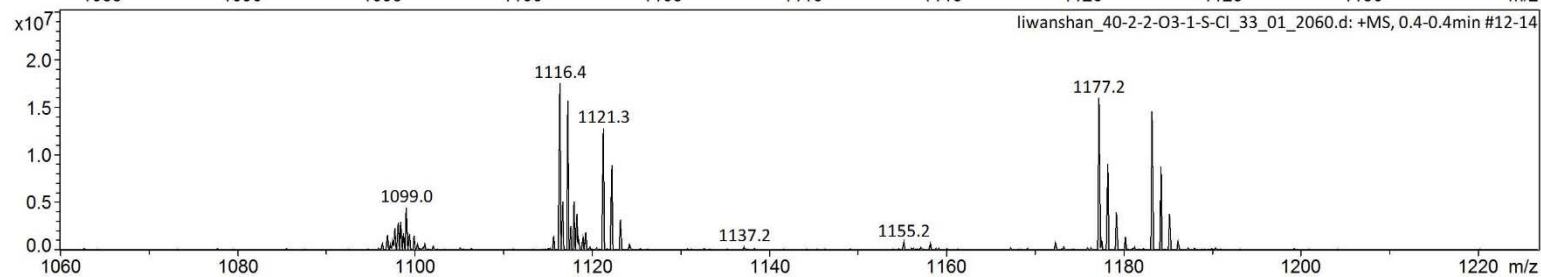

$^1\text{H}$  (400 MHz) NMR spectrum of the fragment **1ar** in  $\text{CD}_3\text{OD}$

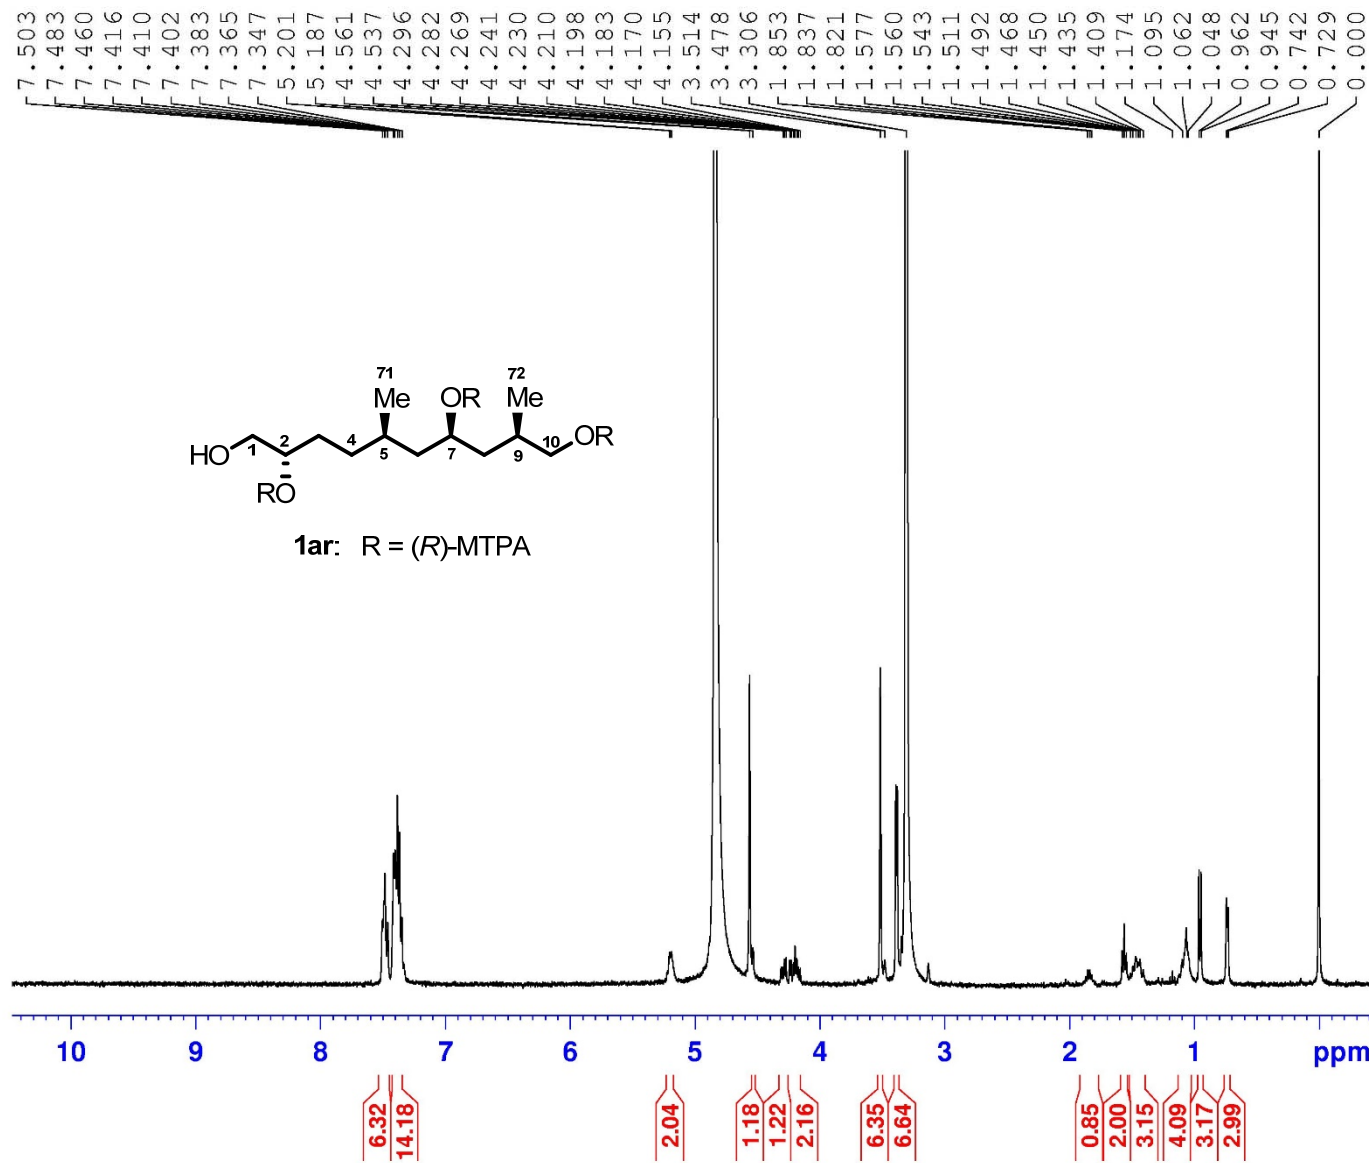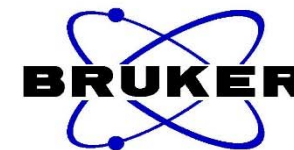

NAME 40-2-2-03-1-S-C1  
 EXPNO 1  
 PROCNO 1  
 Date\_ 20200426  
 Time 11.52  
 INSTRUM spect  
 PROBHD 5 mm PABBO BB/  
 PULPROG zg30  
 TD 65536  
 SOLVENT MeOD  
 NS 32  
 DS 2  
 SWH 8012.820 Hz  
 FIDRES 0.122266 Hz  
 AQ 4.0894966 sec  
 RG 31.02  
 DW 62.400 usec  
 DE 6.50 usec  
 TE 300.0 K  
 D1 1.00000000 sec  
 TD0 1

==== CHANNEL f1 =====  
 SF01 400.1324710 MHz  
 NUC1 1H  
 P1 9.73 usec  
 SI 65536  
 SF 400.1300092 MHz  
 WDW EM  
 SSB 0  
 LB 0.30 Hz  
 GB 0  
 PC 1.00

$^1\text{H}$  (400 MHz) NMR spectrum of the fragment **1ar** in  $\text{CD}_3\text{OD}$

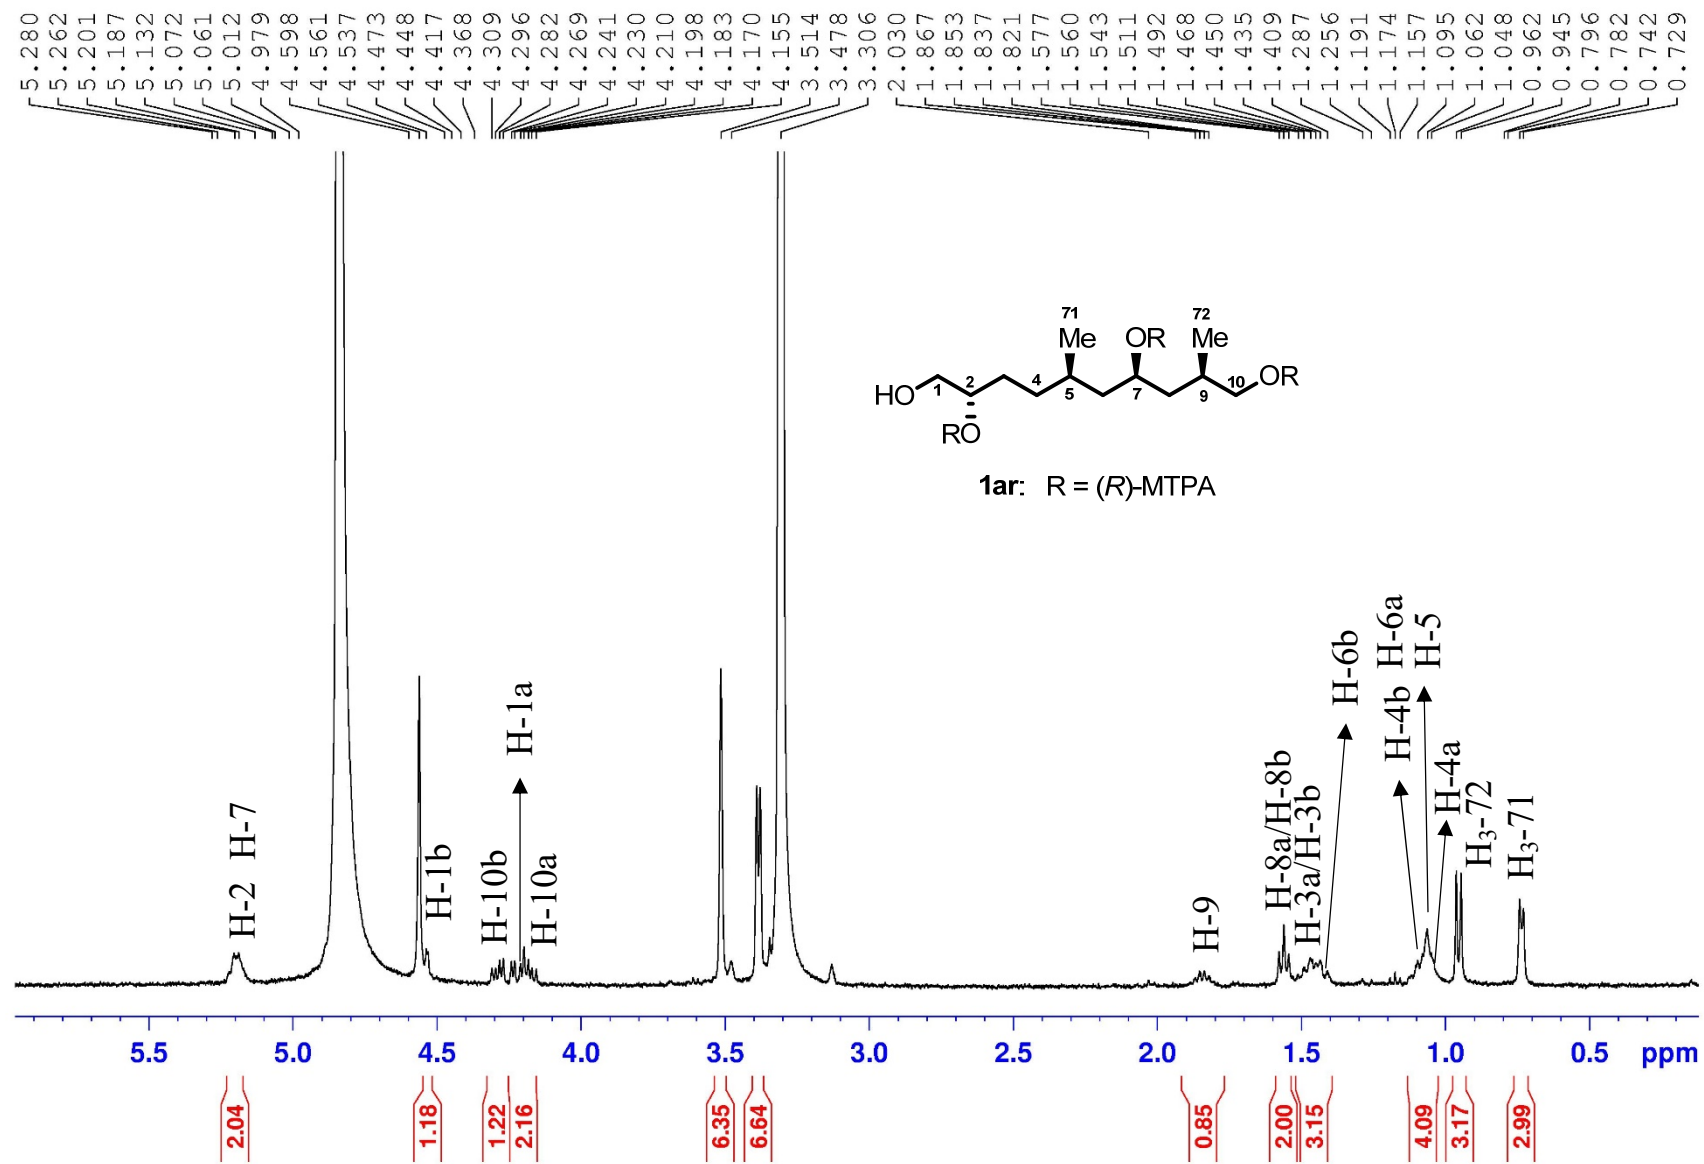

$^1\text{H}$  (400 MHz) NMR spectrum of the fragment **1ar** in  $\text{CD}_3\text{OD}$

— 4.368  
— 4.309  
— 4.296  
— 4.282  
— 4.269  
— 4.241  
— 4.230  
— 4.210  
— 4.198  
— 4.183  
— 4.170  
— 4.155

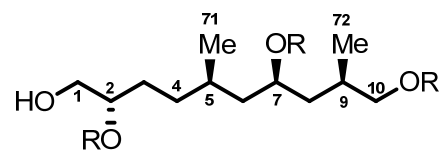

**1ar**: R = (*R*)-MTPA

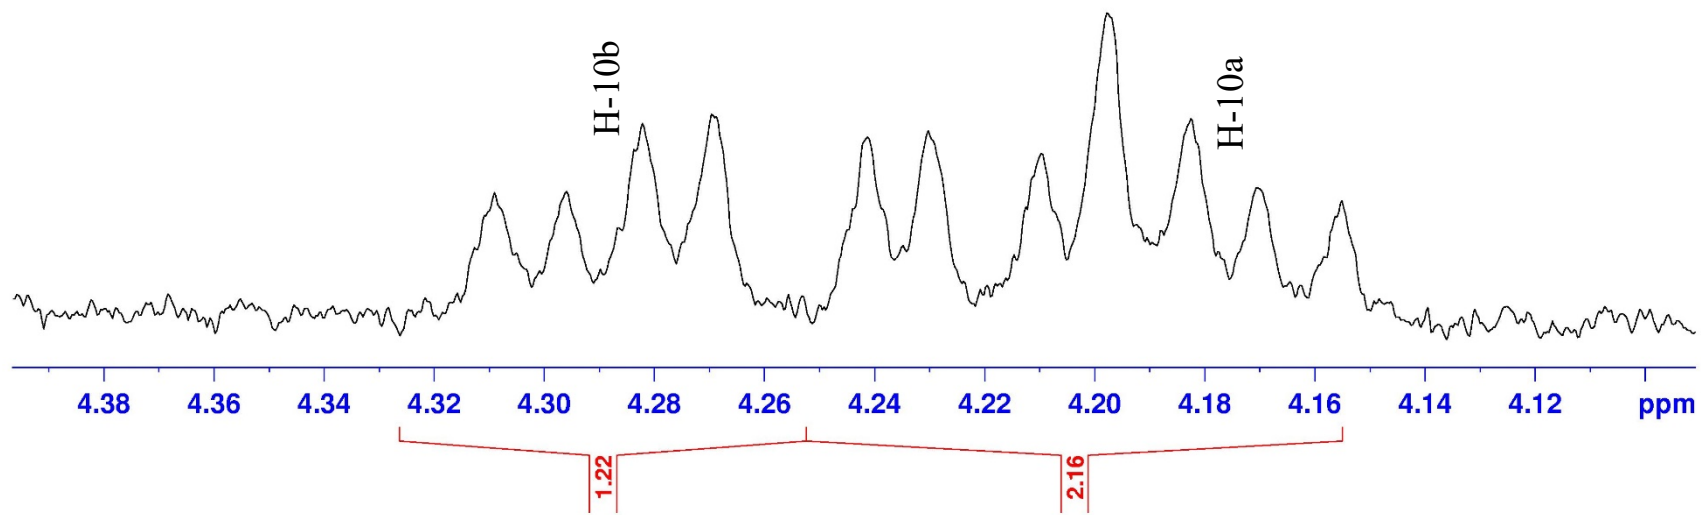

$^1\text{H}$ - $^1\text{H}$  COSY (400 MHz) spectrum of the fragment **1ar** in  $\text{CD}_3\text{OD}$

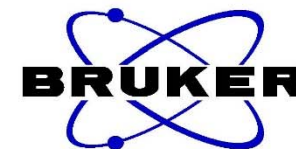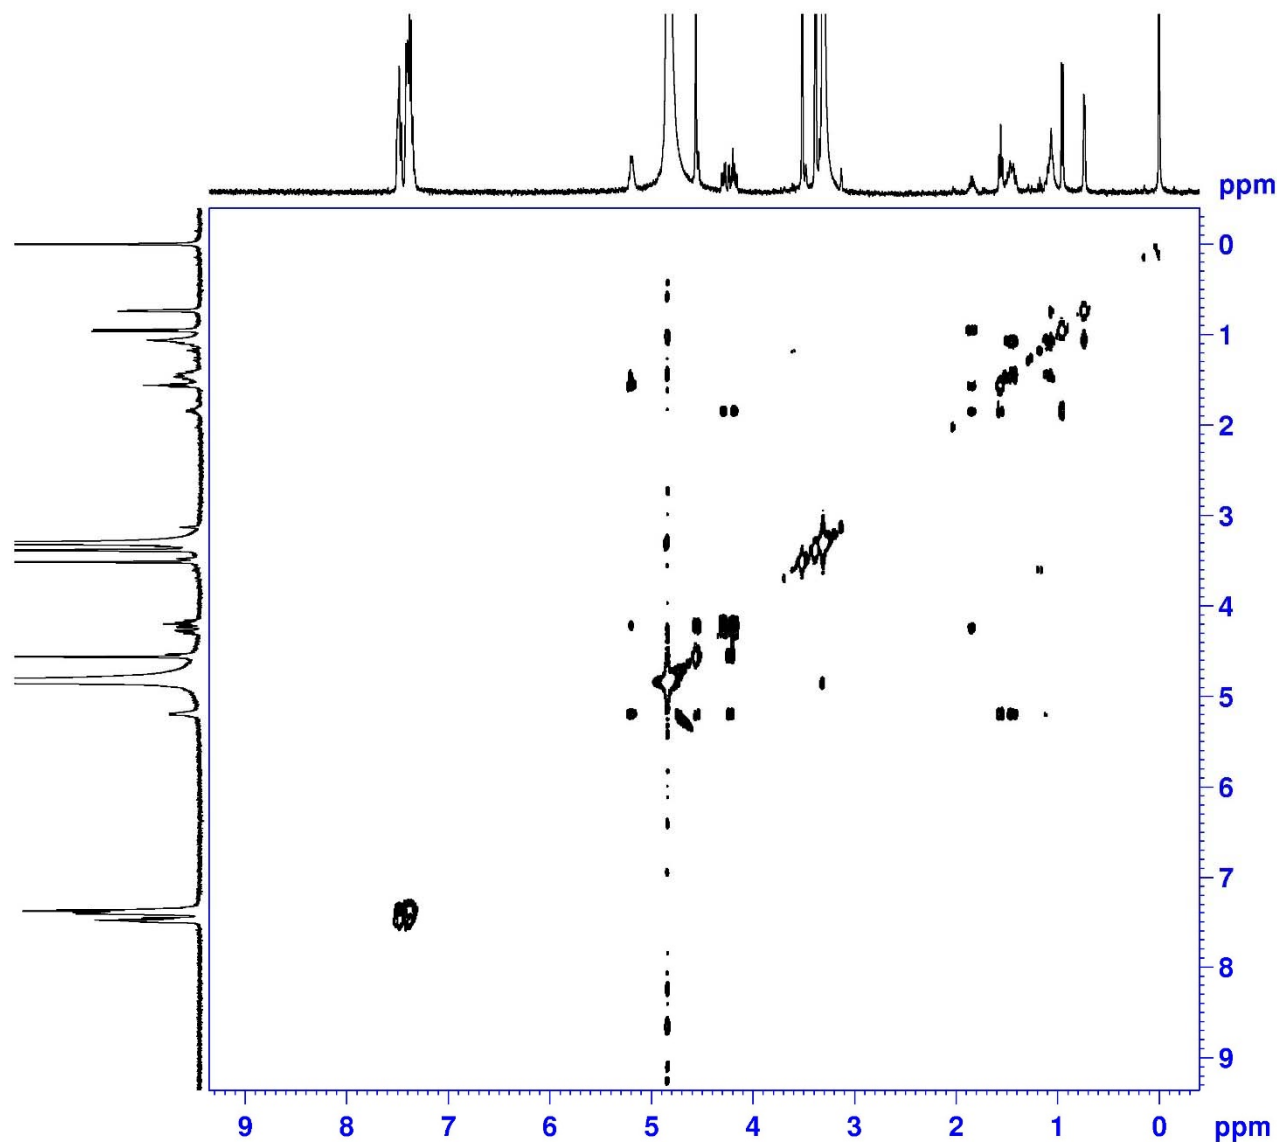

```
NAME      40-2-2-03-1-S-C1
EXPNO     2
PROCNO    1
Date_     20200426
Time      12.00
INSTRUM   spect
PROBHD    5 mm PABBO BB/
PULPROG   cosygpgf
TD        2048
SOLVENT   MeOD
NS        100
DS         8
SWH       4000.000 Hz
FIDRES    1.953125 Hz
AQ        0.2560500 sec
RG        202.1
DW        125.000 usec
DE        6.50 usec
TE        300.0 K
D0        0.00000300 sec
D1        2.00000000 sec
D13       0.00000400 sec
D16       0.00020000 sec
IN0       0.00025000 sec
```

```
===== CHANNEL f1 =====
SFO1     400.1320007 MHz
NUC1     1H
P0       9.73 usec
P1       9.73 usec
ND0      1
TD       128
SFO1     400.132 MHz
FIDRES   31.250000 Hz
SW       9.997 ppm
FnmODE   QF
SI       1024
SF       400.1300092 MHz
WDW      QSINE
SSB      0
LB       0.00 Hz
GB       0
PC       1.40
SI       1024
MC2     QF
SF       400.1300092 MHz
WDW      QSINE
SSB      0
LB       0.00 Hz
```



$^1\text{H}$ - $^1\text{H}$  COSY (400 MHz) spectrum of the fragment **1ar** in  $\text{CD}_3\text{OD}$

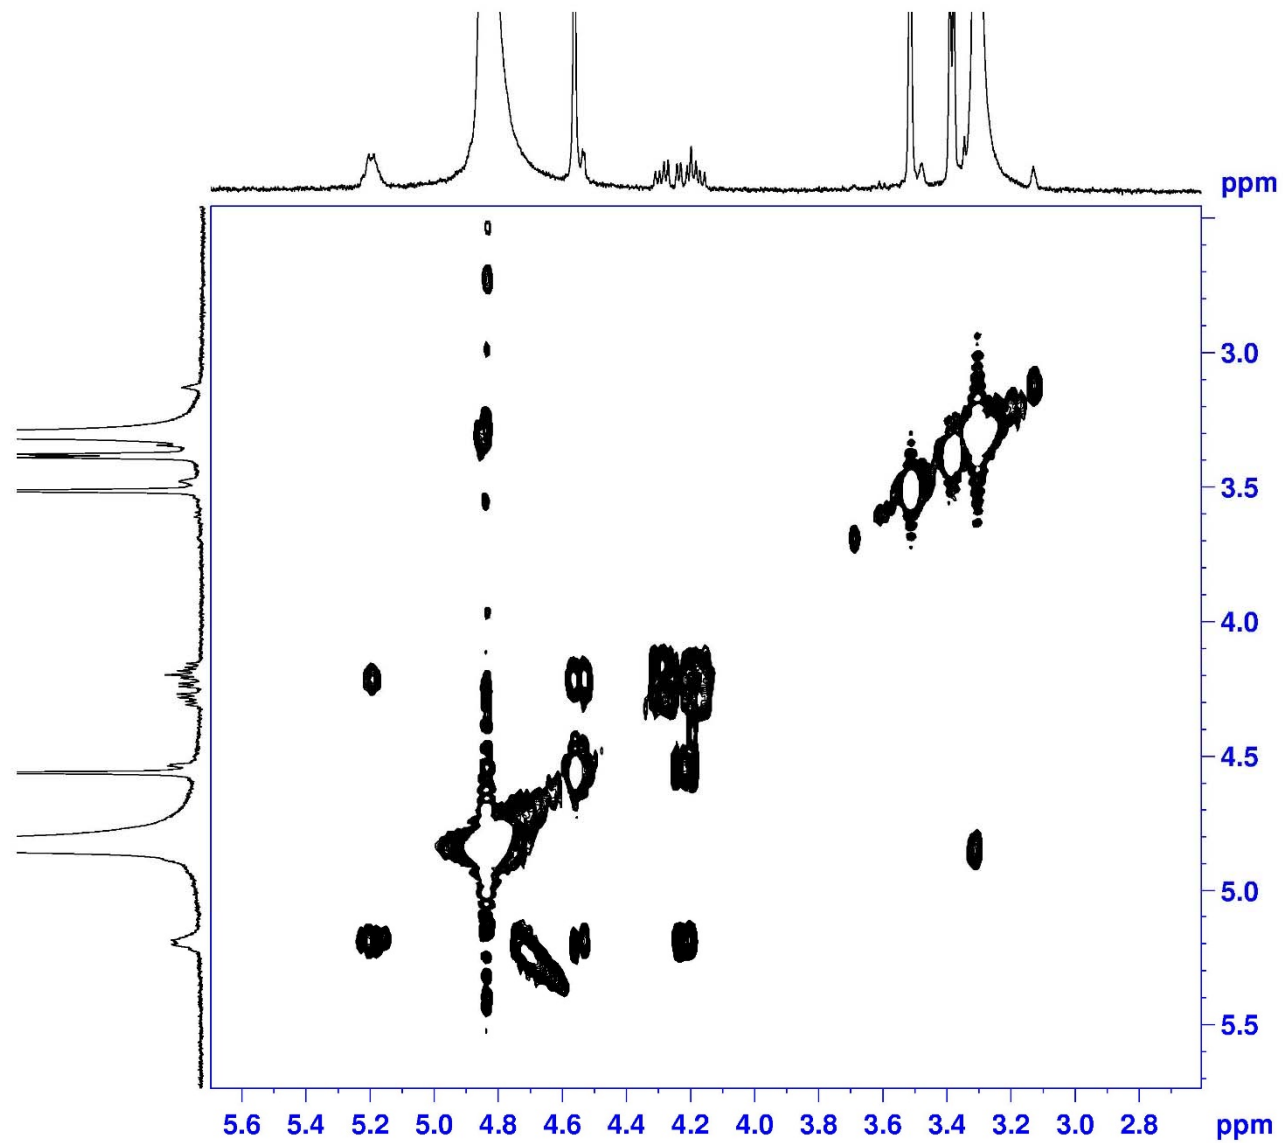



$^1\text{H}$ - $^1\text{H}$  COSY (400 MHz) spectrum of the fragment **1ar** in  $\text{CD}_3\text{OD}$

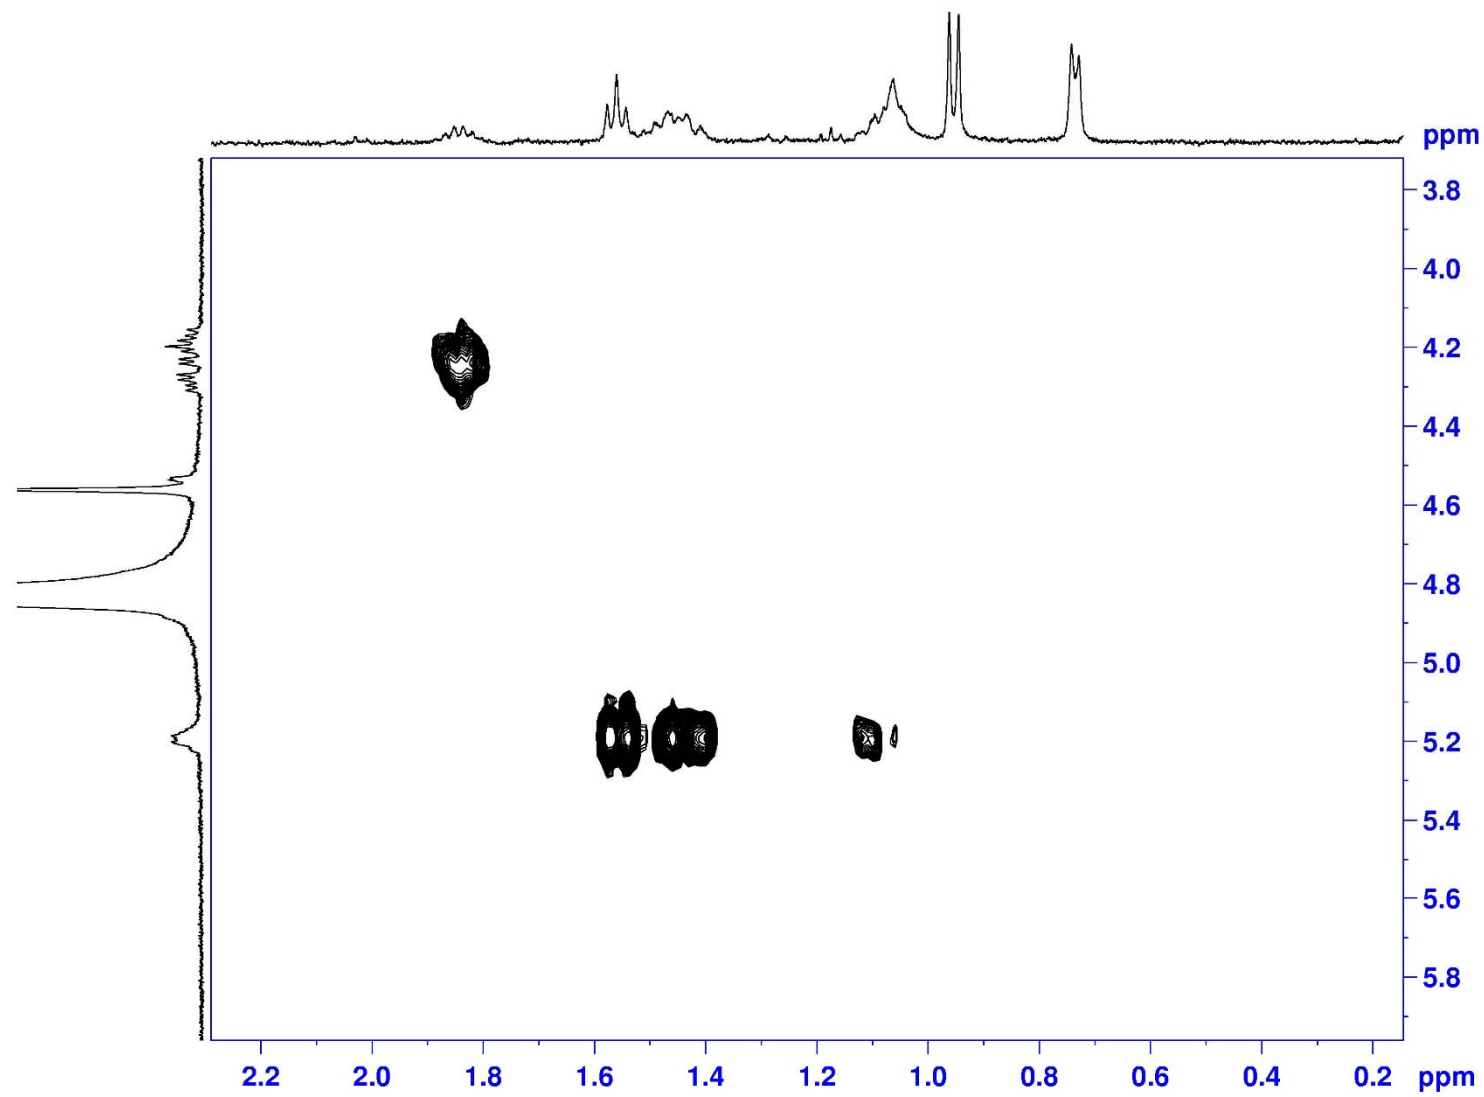

Supplement: marinedrugs-18-00590-s001.pdf [file marinedrugs-18-00590-s001.pdf]
